# Supplementary material for: Kinase Suppressor of RAS 1 (KSR1) Maintains the Transformed Phenotype of BRAFV600E Mutant Human Melanoma Cells
Source: MDPI journal article supplement (doi:10.3390/ijms241411821), 2023-07-23
Supplement: s1 [file s1]

|                           |            |                           |             |
|---------------------------|------------|---------------------------|-------------|
| <b>Client Sample Name</b> | SK-MEL-239 | <b>Client Sample Name</b> | KO1         |
| <b>Sample Code</b>        | CL00000490 | <b>Sample Code</b>        | CL00000491v |
| D8S1179                   | 13,14      | D8S1179                   | 13,14       |
| D21S11                    | 29,31.2    | D21S11                    | 29,31.2     |
| D7S820                    | 8,10       | D7S820                    | 8,10        |
| CSF1PO                    | 12,12      | CSF1PO                    | 12,12       |
| D3S1358                   | 17,17      | D3S1358                   | 17,17       |
| TH01                      | 7,9.3      | TH01                      | 7,9.3       |
| D13S317                   | 12,13      | D13S317                   | 12,13       |
| D16S539                   | 11,12      | D16S539                   | 11,12       |
| D2S1338                   | 20,20      | D2S1338                   | 20,20       |
| D19S433                   | 13,13      | D19S433                   | 13,13       |
| vWA                       | 16,17      | vWA                       | 16,17       |
| TPOX                      | 9,11       | TPOX                      | 9,11        |
| D18S51                    | 15,18      | D18S51                    | 15,18       |
| AMEL                      | X,X        | AMEL                      | X,X         |
| D5S818                    | 11,13      | D5S818                    | 11,13       |
| FGA                       | 20,21,22   | FGA                       | 20,21,22    |
| <b>Database Name</b>      | No Hit     | <b>Database Name</b>      | No Hit      |

  

|                           |            |                           |            |
|---------------------------|------------|---------------------------|------------|
| <b>Client Sample Name</b> | KO2        | <b>Client Sample Name</b> | KO3        |
| <b>Sample Code</b>        | CL00000493 | <b>Sample Code</b>        | CL00000494 |
| D8S1179                   | 13,14      | D8S1179                   | 13,14      |
| D21S11                    | 29,31.2    | D21S11                    | 29,31.2    |
| D7S820                    | 8,10       | D7S820                    | 8,10       |
| CSF1PO                    | 12,12      | CSF1PO                    | 12,12      |
| D3S1358                   | 17,17      | D3S1358                   | 17,17      |
| TH01                      | 7,9.3      | TH01                      | 7,9.3      |
| D13S317                   | 12,13      | D13S317                   | 12,13      |
| D16S539                   | 11,12      | D16S539                   | 11,12      |
| D2S1338                   | 20,20      | D2S1338                   | 20,20      |
| D19S433                   | 13,13      | D19S433                   | 13,13      |
| vWA                       | 16,17      | vWA                       | 16,17      |
| TPOX                      | 9,11       | TPOX                      | 9,11       |
| D18S51                    | 15,18      | D18S51                    | 15,18      |
| AMEL                      | X,X        | AMEL                      | X,X        |
| D5S818                    | 11,13      | D5S818                    | 11,13      |
| FGA                       | 20,21,22   | FGA                       | 20,22      |
| <b>Database Name</b>      | No Hit     | <b>Database Name</b>      | No Hit     |

**Supplementary Table S2. Genotypes of SK-MEL-239 cells and KSR1<sup>-/-</sup> clones.** Genetic lineage analysis of parental SK-MEL-239 and KSR1<sup>-/-</sup> single cell clones (KO1-3). Genetic characteristics were determined by PCR-single-locus-technology using the Thermo Fisher, AmpFISTR® Identifiler® Plus PCR Amplification Kit. In parallel, positive and negative controls were carried out yielding correct results.
