# Supplementary material for: Kinase Suppressor of RAS 1 (KSR1) Maintains the Transformed Phenotype of BRAFV600E Mutant Human Melanoma Cells
Source: Int J Mol Sci. 2023 Jul 23;24(14):11821. doi: 10.3390/ijms241411821 (PMC10380721; doi:10.3390/ijms241411821)
Supplement: Supplementary file 1 [file ijms-24-11821-s001.zip]

Archive with 9 entries (9 files):
- Suppl Table S2.pdf
- Suppl Table S3.xlsx
- Suppl Table S4.xlsx
- Suppl. Fig. S1.tiff
- Suppl. Fig. S2.tiff
- Suppl. Fig. S3.tiff
- Suppl. Fig. S4.tiff
- Suppl. Fig. S5.tiff
- Supplementary Data_May2023.docx
