# Supplementary material for: Kinase Suppressor of RAS 1 (KSR1) Maintains the Transformed Phenotype of BRAFV600E Mutant Human Melanoma Cells
Source: Int J Mol Sci. 2023 Jul 23;24(14):11821. doi: 10.3390/ijms241411821 (PMC10380721; doi:10.3390/ijms241411821)
Supplement: Supplementary file 1 [file ijms-24-11821-s001.zip › Suppl Table S4.xlsx]

## Sheet: Significant up- and downreg.
DOWNREGULATED in KSR1-/- vs PARENTAL SK-MEL-239											UPREGULATED in KSR1-/- vs PARENTAL SK-MEL-239
KO1			KO2			KO3			common in KO1-3		KO1			KO2			KO3			common in KO1-3
Gene Name	foldchange	P value	Gene Name	foldchange	P value	Gene Name	foldchange	P value	Gene Name		Gene Name	foldchange	P value	Gene Name	foldchange	P value	Gene Name	foldchange	P value	Gene Name
STARD7	0.504617	0.00110137	TP53RK	0.505187	0.00959973	GOLGA2	0.502878	0.00424122	CETN2		TUBGCP5	8.99528e+09	2.85403e-14	VRK2	1047960000	5.50039e-10	EPG5	5.27948e+09	0.0168859	VRK2
TOR1AIP1	0.503321	0.0110215	SCYL2	0.504785	0.0240246	GNAO1	0.502341	9.45372e-05	MT2A		NDUFA3	1.46155e+09	0.0496784	EPG5	5.5689e+09	0.00684274	NDUFA3	1.74095e+09	0.0118052	PDCD4
MIF	0.503145	0.0182102	SLTM	0.504119	0.0460169	TCOF1	0.494753	0.0001999	NUDT16		VRK2	1.35982e+09	1.37006e-12	TMEM263	2.19995e+09	0.00646531	LCP1	1.48631e+09	0.000102082	LCP1
NES	0.502949	4.84388e-06	TJP1	0.502275	0.024021	AASS	0.494279	0.000968423	TYMS		SETDB1	1.24673e+09	1.63619e-07	LCP1	1808500000	0.00123047	RXRG	1257230000	0.000219413	CDKN2A
RPL18	0.498667	0.0177829	HSPB1	0.499826	0.000536124	EIF4G3	0.49	0.0127363	NDUFAF2		PDCD4	1148540000	0.000333966	PDCD4	723847500	2.05559e-05	TMEM263	1.14361e+09	0.0209335	DDX28
CCDC137	0.49829	0.00735401	POLDIP2	0.496746	0.048393	SLC16A1	0.489343	0.0482182	MTR		RXRG	7.80633e+08	0.00286932	LPXN	545217500	3.18636e-06	PDCD4	9.35572e+08	1.15145e-07	ADO
L1CAM	0.4972	0.000188008	KIAA1524	0.494991	0.00694886	EMD	0.487131	0.000896206	CKB		SMTN	7.39292e+08	0.00129889	NDUFB11	4.90118e+08	0.0122339	EPT1	794861667	0.0200365	ENPP4
CETN2	0.494013	0.0038219	DNAJC2	0.492696	0.00731487	SERPINB6	0.485665	0.000817336	SYNM		NR4A3	561375000	4.54946e-10	EHD3	3.98483e+08	0.00729672	SLC39A7	7.82893e+08	0.00224228	IGFBP7
MT2A;MT1G	0.483255	0.000248569	EMC7	0.490284	0.0164013	SRPK1	0.480217	0.0070461	SORBS2		MED8	4.9755e+08	0.011348	ENPP4	262047500	2.20637e-07	NGFR	7.01763e+08	0.0010149	MTMR2
DDX19A	0.482533	0.0318267	GAPVD1	0.486353	0.000176052	ITPKB	0.476614	0.0258651	GNG11		PITPNM1	4.712e+08	0.00369427	TRPV4	242140000	7.71748e-10	VAMP2	6.4544e+08	0.0270465	SELO
DPY30	0.482125	0.019436	NELFB	0.482335	0.000789503	GAPVD1	0.476512	8.78662e-06	PDLIM4		FAM195A	4.4958e+08	0.00067906	EMILIN2	2.2543e+08	0.0194398	SLC30A7	6.35892e+08	0.00367596	BAP18
FBXO7	0.481789	0.0233183	C19orf43	0.481472	0.000402129	PYCR2	0.474796	0.0457156	C5orf24		LCP1	4.24753e+08	4.8235e-08	CDKN2A	221952500	0.000141071	LPXN	6.20063e+08	9.49044e-08	RMND5A
NUDT16	0.481632	0.00150971	NAB2	0.48086	0.00208483	NUDT16	0.471259	0.00346043	MAP1B		LRRC8D	422625000	7.05627e-05	DDX28	199272000	0.000422157	GALNT7	608551667	0.0116064	DAXX
CDYL	0.478084	0.0172583	UHRF1	0.475934	0.00602706	NDUFA2	0.469692	0.0435672	CRYAB		TMEM165	4.05203e+08	2.26822e-06	PMM1	1.98473e+08	0.0116078	ELOVL1	5.60212e+08	0.00265023	SEC11C
PSMB6	0.47749	0.0148598	EMD	0.461171	0.00421676	MT2A;MT1G	0.468858	3.62009e-05	TYRP1		WHSC1L1	3.87658e+08	0.000808739	INTS2	1.77038e+08	0.00674032	VRK2	4.94363e+08	0.0171737	ADPRH
TALDO1	0.475669	0.00863559	PHF6	0.460424	0.0386088	STARD7	0.466845	0.00294092	CAPG		POLR2H	381825000	1.34192e-06	FDX1	1.59245e+08	0.01253	SMTN	3.79397e+08	0.00923317	HSPA2
CLTA	0.473604	0.00295335	CETN2	0.455567	0.0315747	CBS	0.466216	0.0154177	SKA2		SP1	3.75507e+08	0.000605258	IGFBP7	1.52746e+08	0.019699	EMILIN2	369970000	0.000139291	SLC27A1
TYMS	0.472546	7.44955e-11	NAPRT	0.452868	0.0222968	MMGT1	0.46483	0.0121652	DNAJA4		HUS1	3.74868e+08	0.000794911	RBMXL1	1.4144e+08	0.00601773	TRPV4	3.41918e+08	1.54014e-06	LRCH1
SPCS1	0.471823	0.00175354	FAM213A	0.445786	0.000289089	TBCD	0.463489	0.0148416	CRIP2		SLC33A1	3.56362e+08	3.14186e-13	ADO	1.01075e+08	0.0478785	TCN1	3.40898e+08	4.39437e-05	DHRS1
EXOSC2	0.470141	0.0109525	TYMS	0.444669	8.67031e-08	GOSR1	0.461665	0.00144217	DAPK3		VPS41	3.50588e+08	0.0199216	IFI35	16.064	0.0208065	TMEM165	3.31358e+08	1.06423e-05	NAGA
DCAF7	0.469073	0.00069205	SENP3	0.443639	0.029867	FMR1	0.460442	0.0175467	PHF10		PEG10	3.17288e+08	6.03562e-10	ATG4B	14.6922	0.0100153	APOBEC3C	326610000	9.50803e-06	VPS53
GLB1	0.467514	0.0080276	CD97	0.443492	0.0421577	ANKRD52	0.460084	0.00304232			CDKN2A	3.15358e+08	2.09163e-08	FUCA1	14.5591	0.00138602	KHDRBS3	2.94552e+08	0.00506611	ECM1
NDUFAF2	0.46079	0.0143796	YES1	0.441778	0.033158	ARL6IP4	0.459907	0.00299572			HMGA2	3.08807e+08	0.000826765	MTMR2	14.0091	0.00115135	EYA4	2.794e+08	0.034474	DAK
NGDN	0.458675	0.012306	RCL1	0.43849	0.0339706	SLC27A3	0.455619	9.88084e-05			DDX28	3.04883e+08	2.65531e-07	FLAD1	12.9567	2.20336e-05	DDX28	268585000	1.8686e-07	CNPY3
HGH1	0.458052	0.0143195	ANKRD52	0.436182	0.0269781	PDRG1	0.454015	0.0187516			MTIF3	3.04582e+08	1.01675e-07	F11R	12.3139	2.14073e-05	SYTL2	2.47598e+08	1.55039e-06	DOCK9
HPRT1	0.454009	0.000654045	REXO4	0.429198	0.0199599	TYMS	0.453985	1.44907e-09			METTL2A	3.03917e+08	8.80441e-12	ADPRH	8.34406	0.000277634	ENPP4	243105000	5.85012e-07	CEACAM1
EEF1D	0.451986	0.020753	SAAL1	0.428893	0.0301235	PAG1	0.449831	0.00588535			E2F3	2.85568e+08	0.000627069	APOD	8.02712	0.0011371	FDX1	2.26282e+08	0.00121799	TST
HIST1H2BM;HIST1H2BL;HIST1H2BN;HIST1H2BH;HIST2H2BF;HIST1H2BC;HIST1H2BD;HIST1H2BK;H2BFS	0.449885	0.013579	ANXA1	0.425699	6.99295e-06	ADAM10	0.449398	0.0112452			NEFH	2.81742e+08	1.29551e-11	RMND5A	7.61089	0.0289626	PLAUR	2.24622e+08	2.0339e-05	MRPS12
GPX1	0.449524	0.000544597	SELH	0.423696	0.0145621	PCK2	0.448836	6.10307e-08			SDHAF3	2.71717e+08	0.00151729	DAXX	7.57251	0.00189008	ALDH1A3	2.24015e+08	0.000954156	FCRLA
ARMC10	0.448409	0.032933	NEDD8	0.423059	0.00981118	UBQLN2	0.443957	0.000846375			DOCK1	2.65648e+08	0.0104089	PLS1	7.56976	9.44443e-05	ABCB6	2.05567e+08	0.00592432	PANX1
POGZ	0.448226	0.00804655	KNTC1	0.422474	0.0221935	SUGP2	0.439768	0.016516			WDR59	239686667	0.0189831	BAP18	7.27271	0.0315423	INTS2	205095000	2.59091e-07	KIAA1598
FAHD1	0.446716	0.0343066	SUMO2	0.422305	0.044934	NELFB	0.437817	4.53488e-05			OSGEPL1	2.36618e+08	8.54651e-08	AIFM2	6.94017	0.0284525	GDAP1	1.97358e+08	0.0124465	PLIN2
H1F0	0.445987	0.0390628	CWC22	0.421257	0.043217	SET	0.434777	0.00930646			TIAL1	2.32478e+08	6.03676e-05	ENDOD1	6.28518	0.03715	TSC22D1	1.92868e+08	0.000947281	NT5E
RRP1B	0.438782	0.00264363	FAM129A	0.418592	0.00605776	DUS3L	0.431994	0.030449			MBNL2	2.30495e+08	0.00138002	SELO	6.11898	0.0444621	CDKN2A	1.90973e+08	0.00291868	SPRYD7
S100A11	0.424083	0.017968	ATAD3B	0.412097	0.000173341	SEC16A	0.430804	0.00303016			VPS39	2.29782e+08	1.41449e-08	LSR	6.00335	0.0103463	PUS1	185530000	0.00036372	CMC2
AK4	0.423763	0.000274068	SS18	0.408027	0.0462183	ATAD2	0.423093	0.00450521			ALG1;ALG1L	2.13868e+08	0.0101812	NAGA	5.95082	0.000668008	SSH3	1.82143e+08	0.00437665	MVP
UHRF1	0.41802	1.47819e-05	C7orf50	0.399815	0.0190897	TBC1D16	0.421288	0.0242042			CCDC175	2.08028e+08	0.00066444	SEC11C	5.9442	0.00151241	SP1	180446667	0.0166903
JMJD6	0.417836	8.06067e-06	SIN3A	0.399374	0.0135416	TRIP10	0.420506	0.00184066			CKMT1A	204335000	8.68721e-08	KLHDC8A	5.84165	0.0440984	SLC33A1	1.68253e+08	0.0129709
SLC1A5	0.396419	0.0119832	CYP20A1	0.397043	0.0244874	MRPS23	0.418931	0.00551872			TRAPPC11	1.98952e+08	9.30104e-07	GATC	5.65448	0.0139595	FAM175B	1.65343e+08	0.00144305
MYCBP	0.393153	0.00566012	PEX14	0.396838	0.0272896	MYO9B	0.417452	0.00152037			HLA-B	1.97717e+08	0.000660446	HSPA2	5.64556	0.000285623	MOCS3	1.64753e+08	0.0102674
SBNO1	0.393001	0.0437421	DNAJA3	0.396764	0.020011	CETN2	0.41476	0.00444228			TRAF2	197346667	0.0130172	ACAD8	5.60209	0.0203538	LRP8	162341667	0.017604
HIST1H1A	0.392741	0.0154656	SNX27	0.388681	0.0215647	INTS3	0.412944	0.0295388			SNUPN	1.94415e+08	0.000704115	CD63	5.27006	0.0284134	DEGS1	1.56105e+08	0.0495166
SNRPF	0.391977	0.0101075	ATF7	0.38351	0.0189825	PPP2R4	0.41249	0.0107453			FAM21A	1.83523e+08	0.000860986	FCRLA	5.05094	2.56499e-08	MBOAT7	1.54892e+08	0.0502851
RBM28	0.386134	2.78614e-06	GTF3C3	0.381543	0.00423566	REEP4	0.409957	0.00589128			SYTL2	179490000	2.24684e-10	VPS53	4.70604	0.00400496	HABP4	1.54175e+08	0.000892487
APOL2	0.384931	0.046221	DAG1	0.375889	0.0185737	SMAD5	0.40876	0.025334			HABP4	1.73297e+08	0.000681969	CDK9	4.52745	0.00660608	DPYSL3	1.53763e+08	0.000768927
RFC2	0.377456	0.0329635		0.368202	0.0120318	SNX27	0.406291	0.00410602			NABP2	1.72867e+08	0.0107225	NT5E	4.1065	0.000413425	LENG8	1.47022e+08	0.00597777
MTR	0.374624	0.0147718	KIAA0101	0.365244	0.0335969	NDUFAF2	0.400186	0.0310178			SSH3	172401667	0.0102615	SLC27A1	3.96964	0.00421282	SLC25A10	145641667	0.0105501
IRF2BPL	0.367063	0.000733548	KANK2	0.362108	0.0219693	GSS	0.39882	0.0134254			NFX1	1.70767e+08	0.00101676	UBASH3B	3.89614	0.00794761	CRYL1	144406667	0.0249427
TEAD1;TEAD4;TEAD2;TEAD3	0.356568	0.0187955	RABL6	0.36188	0.00822403	PLGRKT	0.393766	0.00272005			OARD1	1.70238e+08	0.000660309	RAP2A	3.87635	0.00729242	PEG10	137941667	0.0107448
RPL34	0.355734	0.0171144	PPP1R11	0.348129	0.0212651	PTMS	0.387594	0.047334			LENG8	169206667	0.0115226	DOCK9	3.84006	1.41256e-05	ZWILCH	1.37735e+08	0.0125544
MBP	0.352043	0.00442959	DNAJB6	0.341576	0.0246255	TEAD1;TEAD4;TEAD2;TEAD3	0.387098	0.0211482			METTL14	165455000	1.0162e-07	DHRS1	3.82137	0.0145725	IGFBP7	1.30733e+08	0.00153019
HIST2H3A;HIST1H3A;H3F3A;HIST3H3;H3F3C	0.343985	0.0217591	SRXN1	0.340378	0.0346408	ATF7	0.384355	0.00659196			BECN1	1.64003e+08	0.00131414	CHMP4A	3.78428	0.0412379	TLN2	1.2913e+08	0.0253995
PQBP1	0.342151	0.00229481	MT2A;MT1G	0.328212	0.000186149	MOCOS	0.383923	3.28456e-05			ADO	158170000	6.56605e-10	MFI2	3.49732	0.00474536	LIPA	1.26557e+08	0.050102
CAMSAP2	0.337336	0.0456572	NUDT16	0.320452	0.00502791	GALK1	0.382705	0.00079216			FBXO18	156890000	3.78202e-08	APOBEC3B	3.3905	0.0407078	TIAL1	1.26332e+08	0.0111064
TAX1BP3	0.327649	0.00613373	MMGT1	0.317522	0.0058005	NEK7	0.380424	0.0396444			C3orf17	1.5575e+08	0.000892432	NCOR1	3.32527	0.00427917	PCYOX1L	1.19375e+08	0.000619398
ACTG1	0.326466	0.0111037	SYF2	0.310577	0.0207677	AFF4	0.372935	0.0302104			TMEM57	1.54257e+08	2.58591e-09	NBAS	3.2759	0.0155589	FAM118A	1.15622e+08	0.0110677
UBE2T	0.326192	0.000891769	MYCBP	0.304158	0.00495279	MAP1B	0.354021	0.00110951			MIF4GD	1.51807e+08	2.90218e-11	DAK	3.08975	0.0144029	SIRT5	1.10887e+08	0.0124143
CPT1A	0.323524	0.00935927	SLC27A3	0.299714	0.000263043	HIST2H2BE;HIST1H2BB;HIST1H2BO;HIST1H2BJ;HIST3H2BB	0.352962	0.019526			C21orf59	1.46408e+08	0.0104821	RFTN1	3.08152	0.00693312	OSGEPL1	1.10088e+08	0.0132782
STX7	0.323502	0.0137644	GOSR1	0.283752	0.00250487	SUN1	0.344504	0.00328648			PARP14	1.41167e+08	0.000907361	MOCS2	3.02795	0.00529005	TP53BP2	1.0874e+08	0.0501767
TMA7	0.321041	0.030621	UBE2T	0.264409	0.00932939	APOE	0.331025	0.00588132			SETD9	1.39881e+08	4.2005e-08	TGFBR1	2.87294	0.00241628	BBS1	1.0816e+08	0.0109411
HIST2H2BE;HIST1H2BB;HIST1H2BO;HIST1H2BJ;HIST3H2BB	0.31439	0.014111	LIN7C	0.259092	0.00203468	NUDCD3	0.324829	0.0419854			ZFP36L2	1.32085e+08	0.000914186	ECM1	2.80148	0.0227408	TRAF2	1.06631e+08	0.0321269
H1FX	0.313039	0.0214696	FMR1	0.249837	0.0108266	PFDN6	0.324594	0.00968424			TADA3	1.30115e+08	0.000555081	PLIN2	2.72813	0.0185401	TGOLN2	106336667	0.0154923
RPL29	0.298848	0.0120924	MAP1B	0.249758	0.00127663	MLIP	0.318544	0.000626337			CCDC9	1.29677e+08	0.0504076	PANX1	2.72617	0.0399947	C3orf17	104641667	0.0173373
ZRANB2	0.294183	0.0486567	MTR	0.234838	0.0159651	C9orf78	0.314384	1.55023e-06			COX19	1.27572e+08	0.0104441	MRPL20	2.71128	0.0385743	ANKRD40	1.04438e+08	0.0125173
MOCOS	0.282742	9.0731e-06	ATAD2	0.204771	0.0042461	RBBP6	0.313085	0.0322103			NME3	1.24848e+08	0.0494811	TST	2.69147	0.00942785	SLC35A4	1.04155e+08	0.00189283
CKB	0.272749	0.00847811	C9orf78	0.196004	0.000120939	SORBS2	0.312586	0.0130682			TP53BP2	1.15513e+08	0.0499129	TRPT1	2.65121	0.0384261	CCNL1	9.98167e+07	0.0496909
MRPS23	0.27258	0.0011596	PPP2R4	0.191761	0.00485006	MTR	0.304244	0.0165254			ALG13	1.15492e+08	0.000633996	ASNS	2.62361	0.000577864	ECT2	9.84383e+07	0.000556694
MARCKSL1	0.270924	0.0143995	LMNA	0.189779	0.00465956	TJP1	0.293917	0.000381574			PIK3CA	1.14267e+08	0.000572223	CEACAM1	2.61431	0.00701955	TRAFD1	8.95983e+07	0.0232536
SUMO2	0.258938	0.00149536	ARL6IP4	0.185188	0.000239616	GET4	0.276169	0.00744266			TRAFD1	1.07833e+08	0.0103724	LRCH1	2.58365	0.0327967	PIK3CA	8.73283e+07	0.0119371
PSMC3IP	0.247875	0.00327932	PTGR2	0.180424	0.0460956	C7orf50	0.270524	0.00713378			NUP210	1.06707e+08	0.000667278	SECISBP2L	2.56012	0.0283998	METTL14	8.53688e+07	0.0164542
NDUFB1	0.241831	0.0472825	NDUFAF2	0.175328	0.0123748	L2HGDH	0.264987	0.000643625			PACSIN3	1.06147e+08	0.000584808	GLRX	2.55311	0.00623484	WDR41	84398667	0.021703
ANXA1	0.233711	5.54769e-09	SORBS2	0.164469	0.0183942	RABL6	0.23992	0.00103696			PDE8A	1.0251e+08	0.0103427	PCCB	2.51177	0.0278806	ORC3	8.152e+07	0.0204458
DUT	0.232561	0.00978867	DNAJB4	0.134693	0.0476498	DNAJA4	0.237329	0.0430763			FAM172A	1.0163e+08	0.000575504	SPRYD7	2.49418	0.0161355	SETD9	7.79533e+07	0.0110768
SYNM	0.209248	0.000312166	IMPDH1	0.0767376	0.0260227	ALDH6A1	0.232984	0.00313157			ENPP4	1.00413e+08	3.58919e-07	CMC2	2.48769	0.0220599	ZFYVE1	6.57408e+07	0.0126046
L2HGDH	0.201816	0.000489753	CRYAB	0.0651766	9.01133e-10	WFDC1	0.226969	0.0372006			SP100	9.38183e+07	0.0500091	CNPY3	2.46899	0.00934288	ATXN3	5.90282e+07	0.0112974
RPL31	0.193464	0.0210185	PDLIM4	0.0530748	0.00186432	MLH1	0.225617	0.00440815			LCLAT1	91416667	0.010614	MRPS12	2.42355	0.0353678	ADO	5.48e+07	0.0501433
BTF3	0.192493	0.0143604	MLIP	0.0499171	0.000321752	ALDH16A1	0.2226	0.00158381			ANKRD16	9.07682e+07	1.23337e-09	COG3	2.33982	0.00654676	NME3	5.36268e+07	0.0389015
CHMP1A	0.186797	0.0241621	CKB	0.0246665	0.00795855	QTRT1	0.215628	0.00349305			RPP38	9.01533e+07	0.0102584	MFGE8	2.33861	0.00172286	ASL	4.94278e+07	0.0117302
SORBS2	0.184471	0.00376941	CAPG	0.00881382	0.000664367	FAM213A	0.214069	5.98491e-08			ZFYVE1	8.6569e+07	0.00303259	GRAMD4	2.31664	0.0394883	EXD2	97.1022	0.020306
SPAG7	0.17648	0.0392803	AKT2	1.02248e-08	0.0409336	BMP2K	0.210702	0.000925308			GSDMD	8.62167e+07	0.0494407	RIC8A	2.3102	0.0497572	IFI35	29.2041	0.00301457
GNG11	0.1736	0.000161775	NECAP1	9.91391e-09	0.0456032	ACSF2	0.201436	0.0418654			PRAF2	82776667	0.0104132	HDHD3	2.30581	0.00511992	ATG4B	20.115	0.00422989
NTPCR	0.171492	0.00102043	SKA2	8.49065e-09	0.0401977	DNAJB4	0.200457	0.0252922			SLC20A1	7.7825e+07	0.0137689	ABHD14B	2.29144	9.43549e-06	APOD	18.1054	6.01101e-07
MRPS28	0.166271	0.0478511	GLRX2	6.79002e-09	0.0452775	GPD1L	0.180148	0.043645			BPTF	7.768e+07	0.0102715	CTH	2.2647	0.00076441	IBA57	16.9587	0.000415549
CBX4	0.164241	0.0433513	MPHOSPH6	6.73129e-09	0.0393858	RAPH1	0.173566	0.00789372			KATNB1	7.62512e+07	0.00112901	NRAS	2.2562	0.0191236	AIFM2	15.7697	6.66709e-06
C5orf51	0.162159	0.045961	CASC3	5.38006e-09	0.019824	CLASRP	0.173417	0.019079			TMEM134	74293167	0.0138558	DCT	2.14725	1.56241e-05	TNFRSF14	15.5019	0.00072457
PAK1IP1	0.152703	0.0405268	C5orf24	4.93791e-09	0.00137112	FAM129A	0.153894	4.19256e-05			TTC5	7.11738e+07	0.0119608	PSAP	2.11148	0.0254735	ARSB	11.5964	0.00295272
TMCO1	0.152509	0.000534576	PTRHD1	4.32383e-09	0.019558	PYCR1	0.149257	0.00643143			FARP2	6.75e+07	0.0496765	KIAA1598	2.10689	0.00347621	FUCA1	11.0154	0.000157209
AIM1	0.131703	0.00081622	DNAJA4	3.90793e-09	0.00803414	TMEM106B	0.142772	0.0373354			LRP8	6.68667e+07	0.049865	AMDHD2	2.09887	1.50587e-05	RABL3	10.6323	0.0438168
UCK2	0.125949	0.0341776	HSF1	3.73697e-09	0.037887	ANO10	0.138553	0.0373565			LOH12CR1	5.85313e+07	0.0110278	TM9SF3	2.09771	0.0214325	MTMR2	9.8608	0.00272513
PDLIM4	0.124348	0.000681209	GNG11	3.45226e-09	0.000384531	NUMB	0.133378	0.0418354			KIAA1191	5.61105e+07	0.0121205	FOXRED1	2.09315	0.0279708	ENDOD1	9.55928	0.0366662
SNRPE	0.113613	0.0218608	UBL4A	3.33017e-09	0.0457761	SCD	0.124947	0.0323564			MGRN1	5.46605e+07	0.0102087	MME	2.09065	0.00672848	FLAD1	9.40337	0.00390907
PSMG2	0.107074	0.0113149	SYNM	3.25147e-09	0.000100902	HOMER3	0.114963	0.0279002			CASP7	5.45883e+07	0.0500876	MYO1D	2.072	0.000738447	ANK3	9.3069	0.000349188
C5orf24	0.102264	0.00100313	BRAT1	3.00559e-09	0.0398882	C5orf24	0.11414	0.00137785			GMEB2	5.2995e+07	0.0495713	MVP	2.07149	0.00448756	DPY19L1	9.27367	0.000119249
CALD1	0.101156	0.0390588	PFDN4	2.35456e-09	0.0481798	STX11	0.113479	0.029504			ARNT	5.18683e+07	0.049965	MPI	2.05711	6.81784e-05	GATC	8.8368	0.00538452
PFDN4	0.0898868	0.0261272	CRIP2	1.94837e-09	0.000678933	SYNM	0.0893991	8.49399e-05			IGFBP7	5.10735e+07	0.0198039	COL4A2	2.02864	0.00036752	F11R	8.82553	0.0308982
PTRHD1	0.0771803	0.00897703	PYCR1	1.90659e-09	0.00820681	KANK2	0.0567217	0.000258969			TRUB1	4.03223e+07	0.0501595	ACAT2	2.0189	0.000240929	HERC4	8.80463	0.0269318
DDX51	0.0697837	0.0221517	DAPK3	1.53101e-09	0.0355113	CRYAB	0.0295791	1.34962e-12			DCP1B	18.1867	3.83076e-08	IGF2BP2	2.01008	0.0352066	BAP18	8.5149	0.000372243
MAP1B	0.0669938	4.08871e-05	TYRP1	1.19906e-09	0.000294089	CKB	0.0139956	0.00126221			TNFAIP3	15.6459	0.000332201				AMPH	8.24359	0.000419832
AGPAT5	0.0648379	0.00565	PHF10	4.02676e-10	0.0363849	CALD1	0.00630237	0.0253894			BNIP3L	14.2973	0.00212532				FRMD4A	7.39021	0.00201947
TMEM109	0.0644511	0.00915467				CAPG	0.000955421	4.89265e-05			ABCC2	12.4606	4.1715e-05				GTF2H2C;GTF2H2	6.99289	0.00137788
TUBB2A	0.0588947	0.0158537				RREB1	1.22367e-08	0.0110296			CD63	11.9818	2.66137e-08				DAXX	6.78295	0.00271711
MRPL41	0.0471267	0.0124794				ITGA7	1.06479e-08	0.0500289			HERC4	11.7305	0.0124346				SLC2A14;SLC2A3	6.71099	0.0420853
TXNDC17	0.0423085	0.0126894				SPECC1	1.00363e-08	0.0113057			DPY19L1	11.7119	1.07504e-06				NT5E	6.56916	1.61569e-07
CRYAB	0.0340416	5.65247e-13				SYNJ1	9.51565e-09	0.0493801			ZMYM2	10.4736	3.68386e-06				SELO	6.52868	0.0113686
TYRP1	0.0177464	2.30204e-05				POLRMT	9.21578e-09	0.0385651			TECPR2	10.4231	1.80188e-05				AGPAT9	6.50656	0.000228343
S100A1	0.0173192	0.00121421				ZNF598	8.65801e-09	0.0189098			IRAK4	10.2371	0.000416913				LSR	6.3635	0.000930294
NDUFAF3	0.0156801	0.00606337				SKA2	8.49065e-09	0.0121005			JAG1	10.1332	5.99631e-05				MED23	6.27237	0.000669513
CAPG	0.0137713	5.45346e-05				TBC1D13	8.43834e-09	0.0499151			TNFRSF14	9.87385	0.00851573				PIK3CB	6.18646	0.00955983
RPL39P5;RPL39	0.01102	0.00657731				CNNM3	8.28489e-09	0.0182917			MTMR2	9.64059	0.0028302				ADPRH	6.14485	0.000206966
ITGA7	1.06479e-08	0.0500289				KIAA1143	7.31021e-09	0.0494397			SELO	9.60353	0.00620963				CPT1A	6.14021	5.23442e-05
SYNJ1	9.51565e-09	0.0493801				CTSL	6.37701e-09	0.0470323			PTBP2	9.16743	0.0240669				HSPA2	5.92604	1.07864e-07
POLRMT	9.21578e-09	0.0385651				SNAP25	6.3358e-09	0.0112558			TMEM55A	9.1483	6.27437e-05				TXN2	5.70312	0.0379593
PCCB	8.99583e-09	0.0186603				CLYBL	5.89113e-09	0.0103397			CDKN1B	9.06503	0.0278316				NFKBIB	5.66212	0.0385458
SKA2	8.49065e-09	0.0121005				SSNA1	5.39297e-09	0.0212908			NUDT12	8.83912	2.214e-05				SEC11C	5.6606	0.000353092
KIAA1143	7.31021e-09	0.0494397				WDR62	3.63751e-09	0.0106346			FAM118B	8.51705	0.000180705				PLIN2	5.597	0.00069974
LRRC58	6.46649e-09	0.0175554				GNG11	3.45226e-09	2.57866e-05			PAN3	8.42212	3.17757e-05				ANKRD54	5.56147	0.0247144
SLC35B2	6.03786e-09	0.0135624				VAMP7	3.30167e-09	0.0168723			ACAD8	8.3246	0.00335341				TMEM126A	5.50437	0.0147154
PURA	5.61756e-09	0.0233266				CRIP2	1.94837e-09	5.3775e-05			FRMD4A	8.26191	5.74237e-05				SLC39A14	5.4391	0.0172363
PPT2	5.2783e-09	0.0395175				DAPK3	1.53101e-09	0.010216			BAP18	8.24456	4.53628e-05				GALNT1	5.37058	0.00713964
IMPDH1	4.88938e-09	0.00377882				PDLIM4	1.46981e-09	0.00011005			TMEM126A	8.16321	5.48098e-05				RMND5A	5.33068	0.0188106
DCTN5	4.7716e-09	0.0504192				NUBP2	1.23442e-09	0.0493524			VLDLR	8.12339	0.00445141				BSDC1	5.28007	0.0416792
SF3B4	4.36027e-09	0.0250391				TYRP1	1.19906e-09	1.82529e-05			FAM76A	8.05739	8.10915e-05				LPCAT1	5.27348	0.00259299
TIA1	4.29793e-09	0.0155914				PHF10	4.02676e-10	0.0105605			RMND5A	7.82976	7.58168e-05				UBASH3B	5.11643	0.000451724
DNAJA4	3.90793e-09	0.00137792									IBA57	7.81245	0.0393126				SPTLC2	5.11542	0.0330819
HSF1	3.73697e-09	0.0111602									LMBRD1	7.75996	0.00010504				NAGA	4.93044	0.000203865
C9orf114	3.57809e-09	0.0106693									CHCHD6	7.62249	6.27343e-05				UGCG	4.8972	0.0206757
BRAT1	3.00559e-09	0.0119733									NFKBIB	7.33243	0.000189958				PPIL2	4.89471	0.0306652
RAB39A	2.10142e-09	0.0227701									SUV420H1	7.22029	0.00604144				DHRS1	4.77963	0.00139204
CRIP2	1.94837e-09	5.3775e-05									ASMTL	6.98921	0.00101783				MORC2	4.65327	0.00639726
DAPK3	1.53101e-09	0.010216									DAXX	6.78518	0.00670543				MPC2	4.64845	0.011393
RIOK1	9.63871e-10	0.0389217									PHYH	6.76265	0.000188127				APOBEC3B	4.32873	0.020824
PHF10	4.02676e-10	0.0105605									RALBP1	6.73891	5.34297e-06				NF1	4.19935	0.001028
											UBR1	6.55441	0.00783857				CHCHD2;CHCHD2P9	4.12621	0.00746912
											TRMT10A	6.37899	0.0152637				RAP2A	4.12134	0.000980001
											MAPT	6.23489	0.00111225				RRP7A	3.94654	0.00770808
											CABIN1	6.20706	0.00874591				LIG4	3.90227	0.0181429
											MICALL1	6.09626	0.0122087				VPS53	3.85616	0.00389012
											HMGN3	5.95988	0.00985165				PDDC1	3.78532	0.000444945
											TDP2	5.92781	0.000288983				WDR37	3.73079	0.00215764
											SEC11C	5.91006	3.03551e-05				SERPINB8	3.66992	0.00768037
											TTC17	5.79749	0.00173164				MGAT1	3.58068	0.0061582
											ZAK	5.69747	0.0126858				CLNS1A	3.56846	0.000478872
											GALNT1	5.66872	4.1547e-05				TMEM161A	3.55673	0.0262422
											COG6	5.61928	0.00165222				FAM160B1	3.50913	0.00121921
											KIF3A	5.60619	0.0127567				ITPR1	3.49763	0.0429524
											STBD1	5.53669	0.000148326				CD109	3.47181	0.00898684
											BOLA3	5.52871	0.00116456				PVR	3.45204	0.038481
											NAV1	5.5202	0.00767501				MINPP1	3.43702	0.00383527
											MORC2	5.48636	0.00286231				ARMC9	3.41775	0.0342385
											GDAP2	5.42197	0.0142529				SLC27A1	3.38457	0.00739926
											CHEK2	5.33534	0.00192602				PRKACB	3.3693	0.0371613
											ANK3	5.25241	0.0168482				SPCS3	3.36111	0.0137153
											SEC14L2	5.21107	0.000106359				BCL10	3.1421	0.0238984
											HEATR5A	5.11019	0.00431365				TFDP1	3.14158	0.0227772
											BNIP2	5.10761	0.0418162				MFI2	3.13312	0.000106824
											PTCD1	5.05492	0.0232166				HSBP1	3.12499	0.00460522
											SS18L1	5.02889	1.76398e-05				CADM1	3.11974	0.000964403
											PLEKHM2	5.00022	0.0199939				ACTR10	3.06299	0.0091759
											BID	4.96081	8.7948e-06				MOCS2	3.04124	0.00029962
											DHRS7	4.91941	0.000431876				FAM210A	3.01306	0.005679
											ARFGEF1	4.80547	0.000289047				MSH3	3.01149	0.0294975
											NRBF2	4.78199	0.0264749				ACTR1B	2.99753	0.0454757
											PVR	4.71437	0.00171839				FN1	2.98532	0.000312444
											AVL9	4.61544	0.0256351				LAMTOR2	2.97758	0.0429174
											TCIRG1	4.56806	8.24789e-05				KIAA2013	2.94795	0.000329177
											GFM2	4.55886	0.0318601				MINK1	2.92746	0.0143033
											LIG4	4.51903	0.0171435				TCIRG1	2.91028	0.01347
											MED7	4.51873	0.00388217				ARMCX3	2.89729	0.0233594
											CHKA	4.49415	0.0312817				PIGK	2.8965	0.00981861
											KDM1B	4.4907	0.0296121				SDSL	2.88591	0.0145795
											FOXJ3	4.44346	0.0383519				DCUN1D1	2.85779	0.00129994
											GMPR2	4.42337	0.00115958				HNRNPK	2.84352	0.00215997
											ADPRH	4.36047	0.00186232				DOCK9	2.83344	6.34378e-05
											PRKACB	4.33136	0.000803294				EXOSC6	2.80427	0.0192626
											SERPINB8	4.3215	0.0148246				PANX1	2.79932	0.0248895
											RAB6B	4.25231	0.000477014				MRPS12	2.77709	0.00393551
											TTF2	4.23458	0.0186914				LRCH1	2.76069	0.0156844
											FUCA2	4.20254	0.000694792				FCRLA	2.71475	4.25706e-05
											SMG8	4.19556	0.000606406				FAM103A1	2.70627	0.00460032
											RYBP	4.15268	0.000727297				STAT6	2.68179	0.0229557
											HSPA2	4.11396	0.000270627				TIMM8B	2.63797	0.0302818
											ATP6V0D2	4.09227	0.00183818				SNAPIN	2.62465	0.00903296
											SLC27A1	4.0541	0.00058925				MVP	2.61659	8.5666e-06
											CCND1	4.04467	0.00120545				RBFOX2	2.60357	0.0163394
											COQ6	4.01653	0.0144319				CEACAM1	2.57518	0.00107653
											ANKRD27	3.9868	0.00485854				PSAP	2.5712	0.000693883
											CHTF18	3.94213	0.00321083				SPRYD7	2.55387	0.0223457
											FN3K	3.9121	0.00101871				NKAP	2.49414	0.0256491
											SOS1	3.85446	0.0277458				TNC	2.46671	2.01867e-08
											PLS1	3.84183	0.0198148				CCDC132	2.45663	0.00357684
											NF1	3.79638	0.0185121				DAK	2.43998	0.00329657
											KLC4	3.78805	0.0269361				MPDU1	2.41894	0.0075166
											DBN1	3.78076	0.00125012				GRN	2.41844	0.00466025
											CPSF4	3.74919	0.00216907				ITGA2	2.41832	0.040554
											MINK1	3.73651	0.00176469				IGF2BP2	2.36737	0.000108946
											HSPA4L	3.67933	0.00681088				MME	2.36401	0.000823121
											LRCH1	3.66272	0.000546025				ECM1	2.36363	0.0127273
											ABR	3.64381	0.00275496				SPNS1	2.36108	0.0487008
											TBC1D2B	3.64325	0.00284691				SNIP1	2.35588	0.0287875
											DHRS1	3.63969	0.0161967				ASRGL1	2.34893	4.06644e-05
											ITSN2	3.63221	0.00931556				ZNF512	2.3368	0.0454106
											RPP40	3.63203	0.0069302				MRPS21	2.33158	0.0224681
											SMYD5	3.58724	0.00239533				LIMD1	2.32119	0.00105852
											NAGA	3.52988	0.00273869				RFTN1	2.31413	0.00449446
											VPS53	3.49527	0.00798227				SHCBP1	2.29645	0.0168775
											IRS2	3.49095	0.00405197				TEX264	2.29501	0.0208815
											NOTCH2	3.48309	0.00386808				TST	2.27893	0.00807492
											HMGA1	3.48007	0.0321639				CD9	2.2727	0.0484527
											H6PD	3.46106	0.00398824				COL4A1	2.26865	0.00597201
											ELOF1	3.46044	0.000901397				PUM2	2.2604	0.0250774
											DYNLT3	3.44018	0.00403982				CNPY3	2.2598	0.00420191
											MSH3	3.43705	0.00533217				GYG1	2.24513	0.0214709
											AKAP17A	3.43091	0.00377784				COL4A2	2.24416	0.000338675
											EXOC6B	3.39401	0.00470988				CMC2	2.24007	0.00897736
											ANK2	3.37137	0.00530805				AGPAT1	2.23272	0.00927257
											CEP97	3.36976	0.00120835				NBAS	2.22859	0.0438274
											ARHGAP21	3.36018	0.0124109				GRAMD4	2.21303	0.0170837
											FOSL2	3.34864	0.00700686				C19orf52	2.21243	0.0132824
											STAT6	3.31786	0.00128188				BRE	2.2063	0.026995
											KIF16B	3.30886	0.0104829				ALG9	2.19299	0.0145791
											NUDT8	3.30492	0.0371929				TGFBR1	2.16836	0.00952848
											EIF4ENIF1	3.30208	0.00111189				MRPL2	2.16459	0.000843159
											ASCC1	3.29712	0.000964831				VIMP	2.16423	0.0433557
											RASSF3	3.29501	0.00839894				RELA	2.1604	0.000806223
											RB1CC1	3.29116	0.00519931				MFGE8	2.15398	0.000874459
											MAP3K7	3.28195	0.00287846				PDK3	2.10659	0.0024625
											TOP3B	3.27592	0.0016198				SPR	2.10511	0.0135468
											EGLN1	3.22987	0.0123476				KIAA1598	2.09752	0.000133786
											CHCHD5	3.21403	0.0388092				DCT	2.08525	7.37829e-05
											NCOR1	3.21374	0.0133937				NCDN	2.07384	2.8365e-05
											NR3C1	3.21088	0.00710825				SEL1L	2.07293	0.0160121
											LRRC8A	3.20613	0.00626018				ATOX1	2.07163	9.18716e-08
											COG5	3.20385	0.0118678				LAMP2	2.06674	0.00402815
											PJA2	3.18755	0.00111176				DAGLB	2.0608	0.00320618
											WDR37	3.18581	0.00173372				HMOX1	2.05814	0.00510914
											ERCC3	3.17693	0.00793636				PLBD2	2.03147	0.000298769
											MDP1	3.16746	0.0066599				TLE3	2.02289	0.0248169
											ANKRD44	3.1563	0.00430383				SLC25A1	2.01525	0.0250402
											HNMT	3.15233	0.00766001				LMAN2	2.01417	0.000702152
											RSF1	3.14989	0.00145801				TBC1D22A	2.01399	0.00345397
											MXRA7	3.14007	0.00470388				SLC5A4	2.00312	0.0127709
											CD9	3.13399	0.00201113
											BCL10	3.1284	0.00842137
											ECM1	3.12569	0.00022963
											APPL2	3.12081	0.00308375
											BCAS3	3.11818	0.0115796
											C6orf120	3.11783	0.00770837
											ZNF512	3.11622	0.00184704
											C6orf203	3.09864	0.010348
											GRN	3.0893	0.000300262
											CERS1	3.08147	0.0123167
											COQ5	3.07451	0.0145946
											TERF2	3.06597	0.013435
											DGCR8	3.05831	0.0111321
											POMGNT1	3.03695	0.0440076
											RAB3IL1	3.03337	0.0183093
											MBLAC2	3.0275	0.0351574
											RBBP9	3.02551	0.0100086
											ZNF143	3.02255	0.0107828
											FNBP4	3.00201	0.013191
											MGAT1	2.96606	0.0277762
											UNC93B1	2.95034	0.00389057
											STX18	2.93567	0.0123662
											CLCC1	2.92415	0.0159754
											CCNK	2.91954	0.0182578
											FNDC3A	2.91744	0.0219394
											DAK	2.91047	0.000748136
											ATRX	2.89955	0.0145894
											XYLB	2.89749	0.00178166
											SARM1	2.87505	0.00398166
											GJB1	2.86198	0.0165798
											LPIN1	2.84337	0.000158755
											TRAK2	2.80475	0.0159444
											SLC26A6	2.80132	0.0242205
											DCTN4	2.77729	0.000397873
											SECISBP2L	2.7755	0.00330775
											LRIF1	2.77453	0.0307607
											LAMA1	2.76693	0.0226611
											CNPY3	2.76576	0.000431775
											ASAP2	2.76537	0.00493431
											UNK	2.76164	0.0305
											DOCK9	2.75891	9.6102e-06
											N4BP1	2.7563	0.00467517
											SPNS1	2.74991	0.00495142
											SFSWAP	2.74598	0.0225858
											ZNF703;ZNF503	2.73767	0.0236442
											DAAM2	2.73114	0.00516071
											TOPBP1	2.72676	0.0291711
											CEACAM1	2.71664	1.83608e-05
											NFXL1	2.70914	0.0120535
											ERI3	2.70166	0.0285048
											MEGF9	2.69357	0.0322248
											FRYL	2.67744	0.00608718
											DNASE2	2.67618	0.0136598
											NKAP	2.66799	0.00959882
											RASSF2	2.65636	0.0297052
											DTX3L	2.65283	0.018772
											MARCKS	2.64571	6.82272e-05
											CLK3	2.63409	0.0285925
											TST	2.62733	0.00552269
											PPM1H	2.62721	0.0157011
											MAP3K2	2.62047	0.0337002
											NAP1L5	2.61671	0.000944449
											SHOC2	2.61492	0.037823
											TAOK1	2.60114	0.0321449
											MRPS12	2.59738	0.00831869
											FCRLA	2.59379	1.33248e-05
											PAIP2	2.59022	0.025608
											SCAMP1	2.56833	0.00012072
											KDM4B	2.56428	0.0460623
											SDF2L1	2.53997	7.75997e-05
											WDR89	2.53075	0.0370053
											FAM210A	2.52981	0.00356387
											PANX1	2.50476	0.0245011
											CHD8	2.49198	0.0445671
											ASF1A	2.48598	0.0110199
											CAPN1	2.48006	8.70476e-06
											FDX1L	2.47744	0.0017598
											CD59	2.46612	0.00303797
											AKAP12	2.4632	0.00300358
											NFU1	2.4616	0.0165376
											RABEP2	2.4564	0.00472246
											MSTO1	2.44766	0.0101057
											KIAA1598	2.43398	9.51285e-06
											GIT2	2.41582	0.00308496
											NUBP1	2.41127	0.0274406
											DHX40	2.40595	0.0191821
											MIPEP	2.39349	0.0012671
											MRPS24	2.38931	0.0100114
											GLRX	2.37765	0.000288607
											QPCT	2.36862	0.00377724
											MYO10	2.36578	0.0249801
											PCCA	2.35845	4.89989e-06
											TRAPPC12	2.35551	0.0180951
											FIS1	2.34848	0.00729349
											UBE2Q1	2.34624	0.00634966
											SNX18	2.34332	0.00810126
											INPPL1	2.34136	0.000816323
											EML2	2.32758	0.018173
											DDT;DDTL	2.31754	2.19573e-05
											LRRFIP1	2.3162	3.57016e-05
											PHF3	2.31175	0.00411549
											MRPL18	2.31043	0.0469521
											MINPP1	2.3007	0.0387957
											ASAP1	2.30007	0.0105344
											HMGN5	2.29303	0.00465756
											SLC5A4	2.28187	0.00434836
											TFDP1	2.26976	0.03088
											PLIN2	2.24962	0.01712
											NDUFS5	2.24895	0.0101426
											AMDHD2	2.24276	3.25611e-06
											NT5E	2.23814	5.28674e-05
											GPRIN1	2.2325	0.00728065
											FAM160B1	2.22597	0.027543
											MLPH	2.21696	2.101e-06
											CCDC88A	2.21676	0.00719369
											TNS1	2.20931	1.67641e-06
											RAB27A	2.20202	2.56674e-05
											ACAT2	2.19461	5.47269e-06
											ELMO2	2.18574	0.046328
											MRPL33	2.17939	0.0278507
											STK38	2.17872	0.000207156
											MOSPD2	2.17453	0.0227965
											OTUD7B	2.17383	0.0262019
											MYCBP2	2.1667	0.000479571
											STK39	2.16662	0.00666331
											PPP6R1	2.16469	0.0108973
											LIMD1	2.1611	0.0036551
											ITGA2	2.15893	0.0398361
											SMAP	2.15848	0.00416157
											SCD	2.15251	0.0116638
											SPRYD7	2.14626	0.0181264
											ZFPL1	2.14386	7.34692e-05
											KNOP1	2.13951	0.0443067
											EIF1AD	2.13538	0.0349369
											RELA	2.13505	0.00213887
											TBC1D4	2.13325	0.00624158
											WIBG	2.1302	0.0195482
											PPP1R21	2.12683	0.0485972
											EN2	2.11558	0.0431687
											ASRGL1	2.11375	4.82951e-06
											ASCC3	2.11157	0.00921717
											EYA3	2.11001	0.00638907
											COX17	2.08902	0.0115057
											CMC2	2.08836	0.0222486
											MED29	2.08726	0.0308397
											THNSL1	2.07954	3.996e-05
											UBE2L3	2.07676	2.77687e-05
											MAVS	2.07575	0.00161027
											MVP	2.06251	0.000366004
											TBC1D13	2.05983	0.0432978
											CLIP2	2.05779	0.00956446
											FAM136A	2.04108	0.0149489
											ALG9	2.03882	0.0180414
											NFKB2	2.03533	0.00484913
											VMP1	2.03368	0.0230516
											GLE1	2.03256	0.0373085
											MARK2	2.0325	0.00263319
											TANGO2	2.02972	0.00418112
											DENR	2.0278	0.00327494
											ATOX1	2.01937	2.95201e-07
											SRPR	2.01881	0.000222601
											RNF214	2.01207	0.0129225
											BSG	2.01021	0.00222913
											ARHGAP17	2.00962	0.00465732
											MYO18A	2.00707	0.0230584
											VPS36	2.00173	0.00363755
											CLASP2	2.00154	0.000468967

## Sheet: proteinGroups
Protein IDs	Majority protein IDs	Peptide counts (all)	Peptide counts (razor+unique)	Peptide counts (unique)	Protein names	Gene names	Fasta headers	Number of proteins	Peptides	Razor + unique peptides	Unique peptides	Peptides 1_20_1_Slot1-10_1_2218	Peptides 1_20_1_Slot1-10_2_2219	Peptides 1_20_2_Slot1-11_1_2220	Peptides 1_20_3_Slot1-12_2_2223	Peptides 1_5_1_Slot1-4_1_2202	Peptides 1_5_1_Slot1-4_2_2203	Peptides 1_5_2_Slot1-5_1_2204	Peptides 1_5_2_Slot1-5_2_2205	Peptides 1_5_3_Slot1-6_1_2206	Peptides 1_5_3_Slot1-6_2_2207	Peptides 2_5_1_Slot1-7_1_2210	Peptides 2_5_1_Slot1-7_2_2211	Peptides 2_5_2_Slot1-8_1_2212	Peptides 2_5_2_Slot1-8_2_2213	Peptides 2_5_3_Slot1-9_1_2214	Peptides 2_5_3_Slot1-9_2_2215	Peptides WT1_Slot1-1_1_2195	Peptides WT1_Slot1-1_1_2196	Peptides WT2_Slot1-2_1_2197	Peptides WT2_Slot1-2_2_2198	Peptides WT3_Slot1-3_1_2199	Peptides WT3_Slot1-3_1_2200	Razor + unique peptides 1_20_1_Slot1-10_1_2218	Razor + unique peptides 1_20_1_Slot1-10_2_2219	Razor + unique peptides 1_20_2_Slot1-11_1_2220	Razor + unique peptides 1_20_3_Slot1-12_2_2223	Razor + unique peptides 1_5_1_Slot1-4_1_2202	Razor + unique peptides 1_5_1_Slot1-4_2_2203	Razor + unique peptides 1_5_2_Slot1-5_1_2204	Razor + unique peptides 1_5_2_Slot1-5_2_2205	Razor + unique peptides 1_5_3_Slot1-6_1_2206	Razor + unique peptides 1_5_3_Slot1-6_2_2207	Razor + unique peptides 2_5_1_Slot1-7_1_2210	Razor + unique peptides 2_5_1_Slot1-7_2_2211	Razor + unique peptides 2_5_2_Slot1-8_1_2212	Razor + unique peptides 2_5_2_Slot1-8_2_2213	Razor + unique peptides 2_5_3_Slot1-9_1_2214	Razor + unique peptides 2_5_3_Slot1-9_2_2215
P0DPI2;A0A0B4J2D5;P0DPI2-2;A0A0B4J2D5-2	P0DPI2;A0A0B4J2D5;P0DPI2-2;A0A0B4J2D5-2	10;10;7;7	10;10;7;7	10;10;7;7			sp|P0DPI2|GAL3A_HUMAN Glutamine amidotransferase-like class 1 domain-containing protein 3A, mitochondrial OS=Homo sapiens OX=9606 GN=GATD3A PE=1 SV=1;sp|A0A0B4J2D5|GAL3B_HUMAN Glutamine amidotransferase-like class 1 domain-containing protein 3B, mitochondr	4	10	10	10	9	8	10	10	10	10	10	9	10	10	9	9	10	10	9	8	9	10	10	10	7	6	9	8	10	10	10	10	10	9	10	10	9	9	10	10	9	8
A0A0U1RRE5	A0A0U1RRE5	1	1	1			sp|A0A0U1RRE5|NBDY_HUMAN Negative regulator of P-body association OS=Homo sapiens OX=9606 GN=NBDY PE=1 SV=1	1	1	1	1	0	0	0	1	1	1	1	1	1	1	0	0	0	0	0	0	0	0	0	0	1	0	0	0	0	1	1	1	1	1	1	1	0	0	0	0	0	0
A0A0U1RRL7	A0A0U1RRL7	2	2	2			sp|A0A0U1RRL7|MMPOS_HUMAN Protein MMP24OS OS=Homo sapiens OX=9606 GN=MMP24OS PE=1 SV=1	1	2	2	2	0	0	0	1	1	1	1	1	1	1	0	0	0	0	0	0	0	0	1	1	0	0	0	0	0	1	1	1	1	1	1	1	0	0	0	0	0	0
A0AVT1;A0AVT1-2;A0AVT1-3;A0AVT1-4	A0AVT1;A0AVT1-2	22;17;5;4	22;17;5;4	21;17;4;3	Ubiquitin-like modifier-activating enzyme 6	UBA6	sp|A0AVT1|UBA6_HUMAN Ubiquitin-like modifier-activating enzyme 6 OS=Homo sapiens OX=9606 GN=UBA6 PE=1 SV=1;sp|A0AVT1-2|UBA6_HUMAN Isoform 2 of Ubiquitin-like modifier-activating enzyme 6 OS=Homo sapiens OX=9606 GN=UBA6	4	22	22	21	8	6	13	13	12	13	9	11	10	11	15	9	10	8	11	9	9	10	12	10	7	9	8	6	13	13	12	13	9	11	10	11	15	9	10	8	11	9
A0FGR8-2;A0FGR8;A0FGR8-6;A0FGR8-4;A0FGR8-5	A0FGR8-2;A0FGR8;A0FGR8-6;A0FGR8-4	32;31;31;18;12	32;31;31;18;12	32;31;31;18;12	Extended synaptotagmin-2	ESYT2	sp|A0FGR8-2|ESYT2_HUMAN Isoform 2 of Extended synaptotagmin-2 OS=Homo sapiens OX=9606 GN=ESYT2;sp|A0FGR8|ESYT2_HUMAN Extended synaptotagmin-2 OS=Homo sapiens OX=9606 GN=ESYT2 PE=1 SV=1;sp|A0FGR8-6|ESYT2_HUMAN Isoform 6 of Extended synaptotagmin-2 OS=Homo s	5	32	32	32	12	11	16	13	17	17	16	16	13	15	20	20	15	14	14	12	22	18	16	16	19	15	12	11	16	13	17	17	16	16	13	15	20	20	15	14	14	12
A0JLT2-2;A0JLT2	A0JLT2-2;A0JLT2	2;2	2;2	2;2	Mediator of RNA polymerase II transcription subunit 19	MED19	sp|A0JLT2-2|MED19_HUMAN Isoform 2 of Mediator of RNA polymerase II transcription subunit 19 OS=Homo sapiens OX=9606 GN=MED19;sp|A0JLT2|MED19_HUMAN Mediator of RNA polymerase II transcription subunit 19 OS=Homo sapiens OX=9606 GN=MED19 PE=1 SV=2	2	2	2	2	0	0	1	1	1	1	1	1	1	2	1	2	2	1	1	1	0	0	1	1	1	1	0	0	1	1	1	1	1	1	1	2	1	2	2	1	1	1
A0MZ66-6;A0MZ66;A0MZ66-3;A0MZ66-5;A0MZ66-4;A0MZ66-8;A0MZ66-2;A0MZ66-7	A0MZ66-6;A0MZ66;A0MZ66-3;A0MZ66-5;A0MZ66-4;A0MZ66-8;A0MZ66-2	29;29;29;28;27;26;22;8	29;29;29;28;27;26;22;8	29;29;29;28;27;26;22;8	Shootin-1	KIAA1598	sp|A0MZ66-6|SHOT1_HUMAN Isoform 6 of Shootin-1 OS=Homo sapiens OX=9606 GN=SHTN1;sp|A0MZ66|SHOT1_HUMAN Shootin-1 OS=Homo sapiens OX=9606 GN=SHTN1 PE=1 SV=4;sp|A0MZ66-3|SHOT1_HUMAN Isoform 3 of Shootin-1 OS=Homo sapiens OX=9606 GN=SHTN1;sp|A0MZ66-5|SHOT1_HUM	8	29	29	29	14	14	19	19	17	18	16	14	17	15	22	24	20	18	23	19	4	8	10	14	12	11	14	14	19	19	17	18	16	14	17	15	22	24	20	18	23	19
A1KXE4-2;A1KXE4	A1KXE4-2;A1KXE4	1;1	1;1	1;1	Myelin-associated neurite-outgrowth inhibitor	FAM168B	sp|A1KXE4-2|F168B_HUMAN Isoform 2 of Myelin-associated neurite-outgrowth inhibitor OS=Homo sapiens OX=9606 GN=FAM168B;sp|A1KXE4|F168B_HUMAN Myelin-associated neurite-outgrowth inhibitor OS=Homo sapiens OX=9606 GN=FAM168B PE=1 SV=1	2	1	1	1	1	1	1	1	1	1	1	1	1	1	1	1	1	1	1	1	1	1	1	1	1	0	1	1	1	1	1	1	1	1	1	1	1	1	1	1	1	1
A1L0T0	A1L0T0	17	17	17	Acetolactate synthase-like protein	ILVBL	sp|A1L0T0|HACL2_HUMAN 2-hydroxyacyl-CoA lyase 2 OS=Homo sapiens OX=9606 GN=ILVBL PE=1 SV=2	1	17	17	17	9	9	14	14	15	14	12	14	10	12	13	11	13	13	11	12	12	12	10	12	12	11	9	9	14	14	15	14	12	14	10	12	13	11	13	13	11	12
A1L188	A1L188	1	1	1	Uncharacterized protein C17orf89	C17orf89	sp|A1L188|NDUF8_HUMAN NADH dehydrogenase [ubiquinone] 1 alpha subcomplex assembly factor 8 OS=Homo sapiens OX=9606 GN=NDUFAF8 PE=1 SV=1	1	1	1	1	0	0	0	0	0	0	0	0	1	0	0	0	0	0	0	0	1	1	0	0	0	0	0	0	0	0	0	0	0	0	1	0	0	0	0	0	0	0
A1X283;Q5TCZ1-3;Q5TCZ1;Q5TCZ1-2	A1X283	41;2;2;1	41;2;2;1	41;2;2;1	SH3 and PX domain-containing protein 2B	SH3PXD2B	sp|A1X283|SPD2B_HUMAN SH3 and PX domain-containing protein 2B OS=Homo sapiens OX=9606 GN=SH3PXD2B PE=1 SV=3	4	41	41	41	26	25	30	28	29	29	28	29	25	26	27	26	25	22	27	25	23	20	23	25	24	23	26	25	30	28	29	29	28	29	25	26	27	26	25	22	27	25
A2A3N6	A2A3N6	6	2	1	Putative PIP5K1A and PSMD4-like protein	PIPSL	sp|A2A3N6|PIPSL_HUMAN Putative PIP5K1A and PSMD4-like protein OS=Homo sapiens OX=9606 GN=PIPSL PE=5 SV=1	1	6	2	1	2	3	4	3	3	4	3	3	2	2	5	5	3	4	5	3	2	3	2	3	5	4	0	1	1	1	1	1	1	1	1	1	1	1	2	2	1	0
A2RRP1;A2RRP1-2	A2RRP1;A2RRP1-2	11;9	11;9	11;9	Neuroblastoma-amplified sequence	NBAS	sp|A2RRP1|NBAS_HUMAN Neuroblastoma-amplified sequence OS=Homo sapiens OX=9606 GN=NBAS PE=1 SV=2;sp|A2RRP1-2|NBAS_HUMAN Isoform 2 of Neuroblastoma-amplified sequence OS=Homo sapiens OX=9606 GN=NBAS	2	11	11	11	4	4	8	7	7	6	5	5	7	7	9	9	8	6	5	4	0	1	1	5	3	5	4	4	8	7	7	6	5	5	7	7	9	9	8	6	5	4
A3KMH1-2;A3KMH1-3;A3KMH1	A3KMH1-2;A3KMH1-3;A3KMH1	8;8;8	8;8;8	8;8;8	von Willebrand factor A domain-containing protein 8	VWA8	sp|A3KMH1-2|VWA8_HUMAN Isoform 2 of von Willebrand factor A domain-containing protein 8 OS=Homo sapiens OX=9606 GN=VWA8;sp|A3KMH1-3|VWA8_HUMAN Isoform 3 of von Willebrand factor A domain-containing protein 8 OS=Homo sapiens OX=9606 GN=VWA8;sp|A3KMH1|VWA8_H	3	8	8	8	2	2	6	7	7	7	6	7	5	6	4	4	2	1	3	0	0	2	3	5	4	3	2	2	6	7	7	7	6	7	5	6	4	4	2	1	3	0
A3KN83-3;A3KN83-2;A3KN83;A3KN83-4;Q9Y2G9-3;Q9Y2G9	A3KN83-3;A3KN83-2;A3KN83;A3KN83-4	13;13;13;7;4;4	13;13;13;7;4;4	13;13;13;7;4;4	Protein strawberry notch homolog 1	SBNO1	sp|A3KN83-3|SBNO1_HUMAN Isoform 3 of Protein strawberry notch homolog 1 OS=Homo sapiens OX=9606 GN=SBNO1;sp|A3KN83-2|SBNO1_HUMAN Isoform 2 of Protein strawberry notch homolog 1 OS=Homo sapiens OX=9606 GN=SBNO1;sp|A3KN83|SBNO1_HUMAN Protein strawberry notch	6	13	13	13	2	3	4	5	5	5	6	5	3	3	6	9	7	5	1	6	4	6	4	3	4	3	2	3	4	5	5	5	6	5	3	3	6	9	7	5	1	6
A4D1E9;A4D1E9-2;A4D1E9-3	A4D1E9;A4D1E9-2	8;7;1	8;7;1	8;7;1	GTP-binding protein 10	GTPBP10	sp|A4D1E9|GTPBA_HUMAN GTP-binding protein 10 OS=Homo sapiens OX=9606 GN=GTPBP10 PE=1 SV=1;sp|A4D1E9-2|GTPBA_HUMAN Isoform 2 of GTP-binding protein 10 OS=Homo sapiens OX=9606 GN=GTPBP10	3	8	8	8	4	2	4	5	6	4	5	4	5	5	5	4	6	5	3	3	1	3	6	5	1	3	4	2	4	5	6	4	5	4	5	5	5	4	6	5	3	3
A4D1P6;A4D1P6-2;A4D1P6-3	A4D1P6;A4D1P6-2;A4D1P6-3	13;11;7	13;11;7	13;11;7	WD repeat-containing protein 91	WDR91	sp|A4D1P6|WDR91_HUMAN WD repeat-containing protein 91 OS=Homo sapiens OX=9606 GN=WDR91 PE=1 SV=2;sp|A4D1P6-2|WDR91_HUMAN Isoform 2 of WD repeat-containing protein 91 OS=Homo sapiens OX=9606 GN=WDR91;sp|A4D1P6-3|WDR91_HUMAN Isoform 3 of WD repeat-containing	3	13	13	13	4	4	5	8	8	9	6	7	7	6	9	6	5	5	5	5	4	4	6	6	5	2	4	4	5	8	8	9	6	7	7	6	9	6	5	5	5	5
A5D8V6	A5D8V6	2	2	2	Vacuolar protein sorting-associated protein 37C	VPS37C	sp|A5D8V6|VP37C_HUMAN Vacuolar protein sorting-associated protein 37C OS=Homo sapiens OX=9606 GN=VPS37C PE=1 SV=2	1	2	2	2	1	1	1	0	1	1	1	0	1	1	1	1	0	0	1	1	0	0	0	0	0	1	1	1	1	0	1	1	1	0	1	1	1	1	0	0	1	1
A5PKW4-2;A5PKW4	A5PKW4-2;A5PKW4	1;1	1;1	1;1	PH and SEC7 domain-containing protein 1	PSD	sp|A5PKW4-2|PSD1_HUMAN Isoform 2 of PH and SEC7 domain-containing protein 1 OS=Homo sapiens OX=9606 GN=PSD;sp|A5PKW4|PSD1_HUMAN PH and SEC7 domain-containing protein 1 OS=Homo sapiens OX=9606 GN=PSD PE=1 SV=2	2	1	1	1	0	0	1	1	1	1	1	1	1	1	0	1	1	0	0	0	0	0	1	1	0	0	0	0	1	1	1	1	1	1	1	1	0	1	1	0	0	0
A5PLL7-2;A5PLL7	A5PLL7-2;A5PLL7	1;1	1;1	1;1	Transmembrane protein 189	TMEM189	sp|A5PLL7-2|TM189_HUMAN Isoform 2 of Plasmanylethanolamine desaturase OS=Homo sapiens OX=9606 GN=TMEM189;sp|A5PLL7|TM189_HUMAN Plasmanylethanolamine desaturase OS=Homo sapiens OX=9606 GN=TMEM189 PE=1 SV=3	2	1	1	1	0	0	1	1	1	1	1	1	1	1	1	1	1	1	1	0	0	0	1	1	0	0	0	0	1	1	1	1	1	1	1	1	1	1	1	1	1	0
A5PLN9-2;A5PLN9-4;A5PLN9;A5PLN9-5;A5PLN9-7	A5PLN9-2;A5PLN9-4;A5PLN9;A5PLN9-5;A5PLN9-7	2;2;2;2;1	2;2;2;2;1	2;2;2;2;1	Trafficking protein particle complex subunit 13	TRAPPC13	sp|A5PLN9-2|TPC13_HUMAN Isoform 2 of Trafficking protein particle complex subunit 13 OS=Homo sapiens OX=9606 GN=TRAPPC13;sp|A5PLN9-4|TPC13_HUMAN Isoform 3 of Trafficking protein particle complex subunit 13 OS=Homo sapiens OX=9606 GN=TRAPPC13;sp|A5PLN9|TPC1	5	2	2	2	1	0	1	1	1	1	1	0	0	0	1	1	1	0	0	2	1	1	0	0	0	0	1	0	1	1	1	1	1	0	0	0	1	1	1	0	0	2
A5YKK6;A5YKK6-2;A5YKK6-3;A5YKK6-4	A5YKK6;A5YKK6-2;A5YKK6-3;A5YKK6-4	26;25;23;19	26;25;23;19	26;25;23;19	CCR4-NOT transcription complex subunit 1	CNOT1	sp|A5YKK6|CNOT1_HUMAN CCR4-NOT transcription complex subunit 1 OS=Homo sapiens OX=9606 GN=CNOT1 PE=1 SV=2;sp|A5YKK6-2|CNOT1_HUMAN Isoform 2 of CCR4-NOT transcription complex subunit 1 OS=Homo sapiens OX=9606 GN=CNOT1;sp|A5YKK6-3|CNOT1_HUMAN Isoform 3 of CC	4	26	26	26	12	7	15	19	16	16	16	15	14	16	20	21	16	18	17	14	12	16	16	16	15	14	12	7	15	19	16	16	16	15	14	16	20	21	16	18	17	14
Q9GZQ8;A6NCE7;Q9H492;Q9H492-2	Q9GZQ8;A6NCE7	6;6;1;1	6;6;1;1	6;6;1;1	Microtubule-associated proteins 1A/1B light chain 3B;Microtubule-associated proteins 1A/1B light chain 3 beta 2	MAP1LC3B;MAP1LC3B2	sp|Q9GZQ8|MLP3B_HUMAN Microtubule-associated proteins 1A/1B light chain 3B OS=Homo sapiens OX=9606 GN=MAP1LC3B PE=1 SV=3;sp|A6NCE7|MP3B2_HUMAN Microtubule-associated proteins 1A/1B light chain 3 beta 2 OS=Homo sapiens OX=9606 GN=MAP1LC3B2 PE=2 SV=1	4	6	6	6	5	4	3	5	4	4	4	4	5	4	5	4	4	4	4	4	5	4	5	5	5	5	5	4	3	5	4	4	4	4	5	4	5	4	4	4	4	4
A6NDG6	A6NDG6	5	5	5	Phosphoglycolate phosphatase	PGP	sp|A6NDG6|PGP_HUMAN Glycerol-3-phosphate phosphatase OS=Homo sapiens OX=9606 GN=PGP PE=1 SV=1	1	5	5	5	2	2	2	2	2	2	1	1	1	2	2	3	2	2	2	2	3	3	1	2	1	1	2	2	2	2	2	2	1	1	1	2	2	3	2	2	2	2
A6NDU8	A6NDU8	3	3	3	UPF0600 protein C5orf51	C5orf51	sp|A6NDU8|CE051_HUMAN UPF0600 protein C5orf51 OS=Homo sapiens OX=9606 GN=C5orf51 PE=1 SV=1	1	3	3	3	3	2	2	1	2	1	1	1	1	1	3	3	3	2	3	2	3	3	1	1	2	3	3	2	2	1	2	1	1	1	1	1	3	3	3	2	3	2
A6NED2	A6NED2	1	1	1	RCC1 domain-containing protein 1	RCCD1	sp|A6NED2|RCCD1_HUMAN RCC1 domain-containing protein 1 OS=Homo sapiens OX=9606 GN=RCCD1 PE=1 SV=1	1	1	1	1	0	0	1	1	1	1	1	1	1	1	1	1	1	1	0	0	0	0	1	1	1	1	0	0	1	1	1	1	1	1	1	1	1	1	1	1	0	0
A6NGB9	A6NGB9	1	1	1	WAS/WASL-interacting protein family member 3	WIPF3	sp|A6NGB9|WIPF3_HUMAN WAS/WASL-interacting protein family member 3 OS=Homo sapiens OX=9606 GN=WIPF3 PE=1 SV=4	1	1	1	1	0	0	0	0	1	1	1	1	1	0	0	0	0	0	0	0	0	0	0	0	0	1	0	0	0	0	1	1	1	1	1	0	0	0	0	0	0	0
A6NHR9;A6NHR9-2;A6NHR9-3	A6NHR9;A6NHR9-2	33;33;13	33;33;13	33;33;13	Structural maintenance of chromosomes flexible hinge domain-containing protein 1	SMCHD1	sp|A6NHR9|SMHD1_HUMAN Structural maintenance of chromosomes flexible hinge domain-containing protein 1 OS=Homo sapiens OX=9606 GN=SMCHD1 PE=1 SV=2;sp|A6NHR9-2|SMHD1_HUMAN Isoform 2 of Structural maintenance of chromosomes flexible hinge domain-containing p	3	33	33	33	12	13	16	16	16	16	22	15	16	15	16	19	16	17	14	15	15	18	13	14	14	17	12	13	16	16	16	16	22	15	16	15	16	19	16	17	14	15
A6NIH7;Q13432-2;Q13432	A6NIH7	3;1;1	3;1;1	3;1;1	Protein unc-119 homolog B	UNC119B	sp|A6NIH7|U119B_HUMAN Protein unc-119 homolog B OS=Homo sapiens OX=9606 GN=UNC119B PE=1 SV=1	3	3	3	3	1	2	1	1	1	1	1	1	1	1	1	0	0	0	1	1	0	0	1	2	0	0	1	2	1	1	1	1	1	1	1	1	1	0	0	0	1	1
A6NJ78-2;A6NJ78-4;A6NJ78;A6NJ78-3;P0C7V9	A6NJ78-2;A6NJ78-4;A6NJ78;A6NJ78-3;P0C7V9	2;2;2;1;1	2;2;2;1;1	2;2;2;1;1	Probable methyltransferase-like protein 15;Putative methyltransferase-like protein 15P1	METTL15;METTL15P1	sp|A6NJ78-2|MET15_HUMAN Isoform 2 of 12S rRNA N4-methylcytidine (m4C) methyltransferase OS=Homo sapiens OX=9606 GN=METTL15;sp|A6NJ78-4|MET15_HUMAN Isoform 4 of 12S rRNA N4-methylcytidine (m4C) methyltransferase OS=Homo sapiens OX=9606 GN=METTL15;sp|A6NJ78|	5	2	2	2	1	1	1	1	0	0	0	0	0	0	2	1	0	1	2	1	1	1	0	0	0	1	1	1	1	1	0	0	0	0	0	0	2	1	0	1	2	1
A6NKT7	A6NKT7	19	1	0	RanBP2-like and GRIP domain-containing protein 3	RGPD3	sp|A6NKT7|RGPD3_HUMAN RanBP2-like and GRIP domain-containing protein 3 OS=Homo sapiens OX=9606 GN=RGPD3 PE=3 SV=2	1	19	1	0	11	8	14	10	13	12	10	9	12	11	14	14	11	10	12	10	11	11	12	11	9	10	1	1	1	1	0	0	0	0	0	0	1	1	0	1	1	1
Q17RB0;A6ZKI3	Q17RB0;A6ZKI3	1;1	1;1	1;1	Protein FAM127C;Protein FAM127A	FAM127C;FAM127A	sp|Q17RB0|RTL8B_HUMAN Retrotransposon Gag-like protein 8B OS=Homo sapiens OX=9606 GN=RTL8B PE=1 SV=1;sp|A6ZKI3|RTL8C_HUMAN Retrotransposon Gag-like protein 8C OS=Homo sapiens OX=9606 GN=RTL8C PE=1 SV=1	2	1	1	1	0	0	0	0	1	1	0	0	1	0	0	1	1	0	0	0	1	1	1	1	1	1	0	0	0	0	1	1	0	0	1	0	0	1	1	0	0	0
A7E2V4-5;A7E2V4;A7E2V4-3;A7E2V4-4;A7E2V4-2	A7E2V4-5;A7E2V4;A7E2V4-3;A7E2V4-4;A7E2V4-2	2;2;2;2;2	2;2;2;2;2	2;2;2;2;2	Zinc finger SWIM domain-containing protein 8	ZSWIM8	sp|A7E2V4-5|ZSWM8_HUMAN Isoform 5 of Zinc finger SWIM domain-containing protein 8 OS=Homo sapiens OX=9606 GN=ZSWIM8;sp|A7E2V4|ZSWM8_HUMAN Zinc finger SWIM domain-containing protein 8 OS=Homo sapiens OX=9606 GN=ZSWIM8 PE=1 SV=1;sp|A7E2V4-3|ZSWM8_HUMAN Isofo	5	2	2	2	0	0	1	2	1	2	2	1	2	2	1	2	1	1	1	0	0	0	1	1	1	1	0	0	1	2	1	2	2	1	2	2	1	2	1	1	1	0
A8CG34;A8CG34-2;Q6PJE2-5;Q6PJE2;A6NF01	A8CG34;A8CG34-2	6;5;1;1;1	6;5;1;1;1	2;1;0;0;0	Nuclear envelope pore membrane protein POM 121C	POM121C	sp|A8CG34|P121C_HUMAN Nuclear envelope pore membrane protein POM 121C OS=Homo sapiens OX=9606 GN=POM121C PE=1 SV=3;sp|A8CG34-2|P121C_HUMAN Isoform 2 of Nuclear envelope pore membrane protein POM 121C OS=Homo sapiens OX=9606 GN=POM121C	5	6	6	2	0	0	2	6	5	6	5	5	1	4	3	2	2	1	1	1	1	1	3	4	2	2	0	0	2	6	5	6	5	5	1	4	3	2	2	1	1	1
P62308;A8MWD9	P62308;A8MWD9	3;3	3;3	3;3	Small nuclear ribonucleoprotein G;Putative small nuclear ribonucleoprotein G-like protein 15	SNRPG;SNRPGP15	sp|P62308|RUXG_HUMAN Small nuclear ribonucleoprotein G OS=Homo sapiens OX=9606 GN=SNRPG PE=1 SV=1;sp|A8MWD9|RUXGL_HUMAN Putative small nuclear ribonucleoprotein G-like protein 15 OS=Homo sapiens OX=9606 GN=SNRPGP15 PE=5 SV=2	2	3	3	3	2	2	1	1	1	1	1	1	2	2	2	1	1	2	2	2	3	2	2	1	1	2	2	2	1	1	1	1	1	1	2	2	2	1	1	2	2	2
A8MXV4	A8MXV4	6	6	5	Nucleoside diphosphate-linked moiety X motif 19, mitochondrial	NUDT19	sp|A8MXV4|NUD19_HUMAN Nucleoside diphosphate-linked moiety X motif 19 OS=Homo sapiens OX=9606 GN=NUDT19 PE=1 SV=1	1	6	6	5	3	2	2	2	4	4	2	3	2	2	4	5	4	3	2	2	2	2	3	3	2	4	3	2	2	2	4	4	2	3	2	2	4	5	4	3	2	2
A9UHW6;A9UHW6-2;A9UHW6-3	A9UHW6;A9UHW6-2;A9UHW6-3	2;2;2	2;2;2	2;2;2	MIF4G domain-containing protein	MIF4GD	sp|A9UHW6|MI4GD_HUMAN MIF4G domain-containing protein OS=Homo sapiens OX=9606 GN=MIF4GD PE=1 SV=1;sp|A9UHW6-2|MI4GD_HUMAN Isoform 2 of MIF4G domain-containing protein OS=Homo sapiens OX=9606 GN=MIF4GD;sp|A9UHW6-3|MI4GD_HUMAN Isoform 3 of MIF4G domain-conta	3	2	2	2	0	0	2	2	2	2	2	2	2	2	2	2	2	1	0	0	0	0	1	1	0	0	0	0	2	2	2	2	2	2	2	2	2	2	2	1	0	0
C4AMC7;Q6VEQ5;A8K0Z3;A8MWX3	C4AMC7;Q6VEQ5;A8K0Z3	5;5;4;2	5;5;4;2	2;2;1;0	Putative WAS protein family homolog 3;WAS protein family homolog 2;WAS protein family homolog 1	WASH3P;WASH2P;WASH1	sp|C4AMC7|WASH3_HUMAN Putative WAS protein family homolog 3 OS=Homo sapiens OX=9606 GN=WASH3P PE=1 SV=2;sp|Q6VEQ5|WASH2_HUMAN WAS protein family homolog 2 OS=Homo sapiens OX=9606 GN=WASH2P PE=2 SV=2;sp|A8K0Z3|WASH1_HUMAN WASH complex subunit 1 OS=Homo sapi	4	5	5	2	1	1	3	2	2	3	3	3	2	3	3	2	2	3	1	2	1	1	3	1	2	3	1	1	3	2	2	3	3	3	2	3	3	2	2	3	1	2
C9JLW8	C9JLW8	5	5	5	Protein FAM195B	FAM195B	sp|C9JLW8|MCRI1_HUMAN Mapk-regulated corepressor-interacting protein 1 OS=Homo sapiens OX=9606 GN=MCRIP1 PE=1 SV=1	1	5	5	5	2	3	3	2	3	4	4	3	4	4	3	2	3	4	3	2	3	2	4	4	4	4	2	3	3	2	3	4	4	3	4	4	3	2	3	4	3	2
CON__ENSEMBL:ENSBTAP00000007350	CON__ENSEMBL:ENSBTAP00000007350	2	2	1				1	2	2	1	0	0	1	1	2	1	2	1	2	1	2	2	2	2	0	0	0	0	1	1	1	0	0	0	1	1	2	1	2	1	2	1	2	2	2	2	0	0
CON__ENSEMBL:ENSBTAP00000018229;CON__Q3MHN5	CON__ENSEMBL:ENSBTAP00000018229;CON__Q3MHN5	6;5	6;5	6;5			;	2	6	6	6	1	1	2	4	2	2	3	2	3	3	3	3	1	2	1	2	1	3	4	4	0	1	1	1	2	4	2	2	3	2	3	3	3	3	1	2	1	2
CON__ENSEMBL:ENSBTAP00000024146;P20742	CON__ENSEMBL:ENSBTAP00000024146	23;2	23;2	21;1				2	23	23	21	6	5	11	14	12	8	9	11	8	10	16	16	15	16	10	10	7	13	12	11	9	8	6	5	11	14	12	8	9	11	8	10	16	16	15	16	10	10
CON__ENSEMBL:ENSBTAP00000034412	CON__ENSEMBL:ENSBTAP00000034412	5	5	5				1	5	5	5	1	1	3	2	3	3	3	1	1	2	5	4	4	2	3	2	0	0	1	1	1	0	1	1	3	2	3	3	3	1	1	2	5	4	4	2	3	2
CON__P00735	CON__P00735	6	6	6				1	6	6	6	0	1	3	4	3	2	2	2	2	2	5	5	3	3	5	4	1	0	2	2	2	2	0	1	3	4	3	2	2	2	2	2	5	5	3	3	5	4
CON__P00761	CON__P00761	10	10	10				1	10	10	10	7	9	7	6	5	5	5	5	4	6	9	9	6	6	9	9	8	8	4	4	7	5	7	9	7	6	5	5	5	5	4	6	9	9	6	6	9	9
CON__P01045-1;CON__P01044-1;CON__Q2KJ62	CON__P01045-1;CON__P01044-1;CON__Q2KJ62	2;2;1	2;2;1	2;2;1			;;	3	2	2	2	1	1	1	2	1	2	1	1	1	1	2	2	2	2	2	1	1	1	0	1	0	1	1	1	1	2	1	2	1	1	1	1	2	2	2	2	2	1
CON__P01966	CON__P01966	7	7	4				1	7	7	4	4	4	5	5	5	5	5	4	4	5	6	6	6	5	4	4	3	4	4	4	5	5	4	4	5	5	5	5	5	4	4	5	6	6	6	5	4	4
CON__P02662	CON__P02662	2	2	2				1	2	2	2	0	0	1	0	2	2	1	1	0	0	1	1	0	0	0	0	0	0	0	1	1	0	0	0	1	0	2	2	1	1	0	0	1	1	0	0	0	0
CON__P02769;CON__P02768-1;P02768;P02768-2;P02768-3	CON__P02769	66;5;5;3;2	66;5;5;3;2	66;5;5;3;2				5	66	66	66	51	47	50	56	48	54	53	50	51	50	57	57	52	52	50	52	49	51	51	54	40	38	51	47	50	56	48	54	53	50	51	50	57	57	52	52	50	52
CON__P02777	CON__P02777	3	3	3				1	3	3	3	1	1	3	3	3	3	3	3	3	3	2	3	2	1	1	1	2	3	3	3	2	2	1	1	3	3	3	3	3	3	3	3	2	3	2	1	1	1
CON__P04264;P04264	CON__P04264;P04264	9;9	9;9	5;5	Keratin, type II cytoskeletal 1	KRT1	;sp|P04264|K2C1_HUMAN Keratin, type II cytoskeletal 1 OS=Homo sapiens OX=9606 GN=KRT1 PE=1 SV=6	2	9	9	5	1	2	5	9	1	2	2	3	6	5	1	0	2	3	4	3	1	2	5	5	0	0	1	2	5	9	1	2	2	3	6	5	1	0	2	3	4	3
CON__P06868;P00747	CON__P06868	17;2	17;2	17;2				2	17	17	17	8	4	8	11	13	15	13	13	11	12	15	13	15	13	13	9	3	2	6	7	2	2	8	4	8	11	13	15	13	13	11	12	15	13	15	13	13	9
CON__P12763;P02765	CON__P12763	17;4	17;4	17;4				2	17	17	17	16	16	14	15	15	15	16	14	13	14	16	15	15	13	14	11	14	14	16	16	14	16	16	16	14	15	15	15	16	14	13	14	16	15	15	13	14	11
CON__P13645;P13645;CON__P02535-1;CON__P08730-1;CON__ENSEMBL:ENSP00000377550;CON__Q99456;CON__P08779;CON__P02533;CON__P13646-1;CON__P19012;CON__A2A4G1;CON__Q9QWL7;CON__Q04695;CON__P19001;CON__P08727;P19012;Q04695;P08727;P13646;P02533;P08779;P13646-3;Q99456;P13646-2	CON__P13645;P13645	9;9;2;2;1;1;1;1;1;1;1;1;1;1;1;1;1;1;1;1;1;1;1;1	9;9;2;2;1;1;1;1;1;1;1;1;1;1;1;1;1;1;1;1;1;1;1;1	9;9;2;2;1;1;1;1;1;1;1;1;1;1;1;1;1;1;1;1;1;1;1;1	Keratin, type I cytoskeletal 10	KRT10	;sp|P13645|K1C10_HUMAN Keratin, type I cytoskeletal 10 OS=Homo sapiens OX=9606 GN=KRT10 PE=1 SV=6	24	9	9	9	0	0	3	9	1	1	2	1	4	4	0	1	1	1	3	2	2	1	3	4	1	2	0	0	3	9	1	1	2	1	4	4	0	1	1	1	3	2
CON__P15497	CON__P15497	11	11	11				1	11	11	11	4	3	6	6	6	6	5	6	5	5	5	6	6	5	5	2	5	6	6	7	5	7	4	3	6	6	6	6	5	6	5	5	5	6	6	5	5	2
CON__P17690;P02749	CON__P17690	13;1	13;1	13;1				2	13	13	13	11	9	10	10	8	9	8	8	6	7	10	10	10	9	11	10	3	5	5	6	3	3	11	9	10	10	8	9	8	8	6	7	10	10	10	9	11	10
CON__P17697	CON__P17697	1	1	1				1	1	1	1	0	0	0	0	0	0	0	1	0	0	1	1	0	1	0	0	0	0	0	0	0	0	0	0	0	0	0	0	0	1	0	0	1	1	0	1	0	0
CON__P34955	CON__P34955	16	16	16				1	16	16	16	9	11	9	10	9	10	9	10	8	9	13	13	10	10	11	10	10	11	11	10	11	9	9	11	9	10	9	10	9	10	8	9	13	13	10	10	11	10
CON__P35908v2;CON__P35908;P35908;CON__Q6NXH9	CON__P35908v2;CON__P35908;P35908	7;7;7;2	6;6;6;1	4;4;4;0	Keratin, type II cytoskeletal 2 epidermal	KRT2	;;sp|P35908|K22E_HUMAN Keratin, type II cytoskeletal 2 epidermal OS=Homo sapiens OX=9606 GN=KRT2 PE=1 SV=2	4	7	6	4	0	0	1	7	0	1	0	1	1	2	0	0	0	0	1	1	1	0	1	3	1	0	0	0	1	6	0	0	0	0	0	1	0	0	0	0	1	0
CON__P81644	CON__P81644	4	4	4				1	4	4	4	2	2	1	1	2	2	2	1	1	1	2	2	2	3	2	2	2	2	2	2	3	2	2	2	1	1	2	2	2	1	1	1	2	2	2	3	2	2
CON__Q0IIK2;CON__Q29443;P02788-2;P02788;CON__Q2HJF0;P02787	CON__Q0IIK2;CON__Q29443	56;55;2;2;1;1	56;55;2;2;1;1	56;55;2;2;1;1			;	6	56	56	56	35	31	41	32	38	34	34	40	35	36	44	47	39	37	45	44	32	33	35	34	24	23	35	31	41	32	38	34	34	40	35	36	44	47	39	37	45	44
CON__Q1RMK2	CON__Q1RMK2	1	1	1				1	1	1	1	0	0	0	1	1	0	1	0	0	0	1	1	1	1	0	0	0	0	0	0	0	0	0	0	0	1	1	0	1	0	0	0	1	1	1	1	0	0
CON__Q1RMN8	CON__Q1RMN8	1	1	1				1	1	1	1	0	0	1	1	1	1	1	1	1	1	1	0	1	1	0	0	0	0	1	1	0	0	0	0	1	1	1	1	1	1	1	1	1	0	1	1	0	0
CON__Q28065	CON__Q28065	2	2	2				1	2	2	2	0	0	2	1	1	1	2	1	1	0	1	1	0	0	1	0	0	0	1	1	0	0	0	0	2	1	1	1	2	1	1	0	1	1	0	0	1	0
CON__Q28107;P12259	CON__Q28107	5;1	5;1	5;1				2	5	5	5	2	2	3	3	3	3	2	2	3	3	3	4	3	3	2	3	0	0	0	2	1	2	2	2	3	3	3	3	2	2	3	3	3	4	3	3	2	3
CON__Q28194;P07996-2;P07996	CON__Q28194;P07996-2;P07996	1;1;1	1;1;1	1;1;1	Thrombospondin-1	THBS1	;sp|P07996-2|TSP1_HUMAN Isoform 2 of Thrombospondin-1 OS=Homo sapiens OX=9606 GN=THBS1;sp|P07996|TSP1_HUMAN Thrombospondin-1 OS=Homo sapiens OX=9606 GN=THBS1 PE=1 SV=2	3	1	1	1	0	0	0	0	0	0	0	0	0	0	0	0	0	0	0	0	0	0	1	1	0	0	0	0	0	0	0	0	0	0	0	0	0	0	0	0	0	0
CON__Q2KJF1	CON__Q2KJF1	2	2	2				1	2	2	2	1	0	1	1	1	1	1	1	0	1	1	1	1	1	1	1	0	1	1	1	1	0	1	0	1	1	1	1	1	1	0	1	1	1	1	1	1	1
CON__Q3SX09;CON__P02070;P68871;P02042;P69892;P69891;P02100	CON__Q3SX09	15;3;2;2;1;1;1	15;3;2;2;1;1;1	15;3;2;2;1;1;1				7	15	15	15	11	11	11	9	9	12	10	10	11	9	13	13	11	11	12	11	9	11	9	9	6	7	11	11	11	9	9	12	10	10	11	9	13	13	11	11	12	11
CON__Q3SX14	CON__Q3SX14	34	2	2				1	34	2	2	24	24	26	25	25	26	26	24	24	27	24	25	23	23	24	22	18	21	24	25	26	26	0	0	1	1	2	0	1	1	0	1	1	1	0	1	0	0
CON__Q3SX28;P07951-3;P07951-2;P07951	CON__Q3SX28;P07951-3;P07951-2;P07951	16;16;16;16	4;4;4;4	4;4;4;4	Tropomyosin beta chain	TPM2	;sp|P07951-3|TPM2_HUMAN Isoform 3 of Tropomyosin beta chain OS=Homo sapiens OX=9606 GN=TPM2;sp|P07951-2|TPM2_HUMAN Isoform 2 of Tropomyosin beta chain OS=Homo sapiens OX=9606 GN=TPM2;sp|P07951|TPM2_HUMAN Tropomyosin beta chain OS=Homo sapiens OX=9606 GN=TP	4	16	4	4	13	14	13	10	12	12	13	12	12	13	13	12	13	12	12	12	10	12	12	13	11	13	2	3	2	1	2	2	3	2	2	2	2	2	2	2	1	1
CON__Q3SZ57;P02771	CON__Q3SZ57	12;1	12;1	12;1				2	12	12	12	4	1	2	4	2	2	3	2	3	2	7	5	5	5	5	2	6	7	3	3	2	2	4	1	2	4	2	2	3	2	3	2	7	5	5	5	5	2
CON__Q3SZR3	CON__Q3SZR3	3	3	3				1	3	3	3	1	1	2	2	2	2	2	2	2	2	2	2	2	2	2	0	2	2	3	3	1	2	1	1	2	2	2	2	2	2	2	2	2	2	2	2	2	0
CON__Q3SZV7	CON__Q3SZV7	2	2	2				1	2	2	2	1	0	0	1	1	1	0	1	1	0	0	1	1	0	1	1	1	2	0	0	0	0	1	0	0	1	1	1	0	1	1	0	0	1	1	0	1	1
CON__Q3T052	CON__Q3T052	3	3	3				1	3	3	3	1	1	2	1	1	1	1	1	1	1	2	1	1	2	0	1	2	1	1	1	1	1	1	1	2	1	1	1	1	1	1	1	2	1	1	2	0	1
CON__Q3ZBD7	CON__Q3ZBD7	10	2	2				1	10	2	2	8	6	8	7	7	7	7	7	6	7	7	8	8	7	7	7	6	8	8	6	9	9	1	1	1	2	2	2	2	2	2	2	2	2	2	2	2	1
CON__Q3ZBS7	CON__Q3ZBS7	10	10	8				1	10	10	8	8	7	5	5	5	5	6	6	5	4	7	7	5	5	7	6	1	4	2	2	6	6	8	7	5	5	5	5	6	6	5	4	7	7	5	5	7	6
CON__Q58D62	CON__Q58D62	5	5	5				1	5	5	5	3	2	4	4	2	1	2	2	1	2	3	4	3	2	3	3	2	4	2	1	2	2	3	2	4	4	2	1	2	2	1	2	3	4	3	2	3	3
CON__Q9TRI1;P19823	CON__Q9TRI1	4;1	4;1	4;1				2	4	4	4	1	1	1	1	2	1	1	0	1	1	4	2	1	1	1	1	0	0	1	1	1	0	1	1	1	1	2	1	1	0	1	1	4	2	1	1	1	1
Q13765;E9PAV3-2;E9PAV3	Q13765;E9PAV3-2;E9PAV3	9;9;9	9;9;9	7;7;7	Nascent polypeptide-associated complex subunit alpha;Nascent polypeptide-associated complex subunit alpha, muscle-specific form	NACA	sp|Q13765|NACA_HUMAN Nascent polypeptide-associated complex subunit alpha OS=Homo sapiens OX=9606 GN=NACA PE=1 SV=1;sp|E9PAV3-2|NACAM_HUMAN Isoform skNAC-2 of Nascent polypeptide-associated complex subunit alpha, muscle-specific form OS=Homo sapiens OX=960	3	9	9	7	7	7	6	6	5	6	7	7	4	6	7	7	7	7	8	8	6	7	5	6	8	8	7	7	6	6	5	6	7	7	4	6	7	7	7	7	8	8
E9PRG8	E9PRG8	6	6	6	Uncharacterized protein C11orf98	C11orf98	sp|E9PRG8|CK098_HUMAN Uncharacterized protein C11orf98 OS=Homo sapiens OX=9606 GN=C11orf98 PE=4 SV=2	1	6	6	6	3	4	5	5	5	5	5	6	5	4	6	6	5	6	5	6	4	4	2	2	5	5	3	4	5	5	5	5	5	6	5	4	6	6	5	6	5	6
L0R6Q1	L0R6Q1	3	3	3		SLC35A4	sp|L0R6Q1|S35U4_HUMAN SLC35A4 upstream open reading frame protein OS=Homo sapiens OX=9606 GN=SLC35A4 PE=3 SV=1	1	3	3	3	0	0	1	0	0	1	0	0	1	0	2	2	2	2	2	1	0	0	1	1	2	2	0	0	1	0	0	1	0	0	1	0	2	2	2	2	2	1
L0R819	L0R819	3	2	2		ASNSD1	sp|L0R819|ASURF_HUMAN ASNSD1 upstream open reading frame protein OS=Homo sapiens OX=9606 GN=ASDURF PE=1 SV=1	1	3	2	2	0	0	1	2	2	1	2	2	2	2	1	2	2	2	1	1	1	1	1	1	1	1	0	0	0	1	1	0	1	1	1	1	0	1	1	1	0	0
L0R8F8	L0R8F8	1	1	1		SMCR7L	sp|L0R8F8|MIDUO_HUMAN MIEF1 upstream open reading frame protein OS=Homo sapiens OX=9606 GN=MIEF1 PE=1 SV=1	1	1	1	1	1	0	1	1	1	1	1	1	1	1	1	1	1	1	0	0	0	0	1	1	1	1	1	0	1	1	1	1	1	1	1	1	1	1	1	1	0	0
O00115-2;O00115	O00115-2;O00115	4;4	4;4	4;4	Deoxyribonuclease-2-alpha	DNASE2	sp|O00115-2|DNS2A_HUMAN Isoform 2 of Deoxyribonuclease-2-alpha OS=Homo sapiens OX=9606 GN=DNASE2;sp|O00115|DNS2A_HUMAN Deoxyribonuclease-2-alpha OS=Homo sapiens OX=9606 GN=DNASE2 PE=1 SV=2	2	4	4	4	3	4	3	3	3	2	2	2	2	2	4	3	2	2	4	4	3	3	1	2	2	2	3	4	3	3	3	2	2	2	2	2	4	3	2	2	4	4
O00116	O00116	38	38	37	Alkyldihydroxyacetonephosphate synthase, peroxisomal	AGPS	sp|O00116|ADAS_HUMAN Alkyldihydroxyacetonephosphate synthase, peroxisomal OS=Homo sapiens OX=9606 GN=AGPS PE=1 SV=1	1	38	38	37	26	24	22	22	23	23	19	22	23	21	25	30	26	24	27	24	23	23	23	24	27	26	26	24	22	22	23	23	19	22	23	21	25	30	26	24	27	24
O00124-3;O00124	O00124-3;O00124	1;1	1;1	1;1	UBX domain-containing protein 8	UBXN8	sp|O00124-3|UBXN8_HUMAN Isoform 3 of UBX domain-containing protein 8 OS=Homo sapiens OX=9606 GN=UBXN8;sp|O00124|UBXN8_HUMAN UBX domain-containing protein 8 OS=Homo sapiens OX=9606 GN=UBXN8 PE=1 SV=2	2	1	1	1	0	0	0	1	1	1	1	1	1	1	1	0	0	1	0	0	0	0	1	1	0	0	0	0	0	1	1	1	1	1	1	1	1	0	0	1	0	0
O00139-2;O00139-1;O00139-5;O00139;O00139-4	O00139-2;O00139-1;O00139-5;O00139;O00139-4	19;18;18;18;18	18;17;17;17;17	17;16;16;16;16	Kinesin-like protein KIF2A	KIF2A	sp|O00139-2|KIF2A_HUMAN Isoform 2 of Kinesin-like protein KIF2A OS=Homo sapiens OX=9606 GN=KIF2A;sp|O00139-1|KIF2A_HUMAN Isoform 1 of Kinesin-like protein KIF2A OS=Homo sapiens OX=9606 GN=KIF2A;sp|O00139-5|KIF2A_HUMAN Isoform 5 of Kinesin-like protein KIF2	5	19	18	17	15	13	17	14	15	14	14	14	12	14	17	18	17	16	16	12	13	14	11	12	14	15	14	12	16	13	14	13	13	13	11	13	16	17	16	15	15	12
O00141-4;O00141;O00141-3;O00141-5;O00141-2	O00141-4;O00141;O00141-3;O00141-5;O00141-2	1;1;1;1;1	1;1;1;1;1	1;1;1;1;1	Serine/threonine-protein kinase Sgk1	SGK1	sp|O00141-4|SGK1_HUMAN Isoform 4 of Serine/threonine-protein kinase Sgk1 OS=Homo sapiens OX=9606 GN=SGK1;sp|O00141|SGK1_HUMAN Serine/threonine-protein kinase Sgk1 OS=Homo sapiens OX=9606 GN=SGK1 PE=1 SV=2;sp|O00141-3|SGK1_HUMAN Isoform 3 of Serine/threonin	5	1	1	1	0	0	1	1	1	1	1	1	1	1	1	1	1	1	0	0	0	0	1	1	0	1	0	0	1	1	1	1	1	1	1	1	1	1	1	1	0	0
O00142-5;O00142-2;O00142-3;O00142-4;O00142;O00142-6	O00142-5;O00142-2;O00142-3;O00142-4;O00142;O00142-6	1;1;1;1;1;1	1;1;1;1;1;1	1;1;1;1;1;1	Thymidine kinase 2, mitochondrial	TK2	sp|O00142-5|KITM_HUMAN Isoform 5 of Thymidine kinase 2, mitochondrial OS=Homo sapiens OX=9606 GN=TK2;sp|O00142-2|KITM_HUMAN Isoform 2 of Thymidine kinase 2, mitochondrial OS=Homo sapiens OX=9606 GN=TK2;sp|O00142-3|KITM_HUMAN Isoform 3 of Thymidine kinase 2	6	1	1	1	1	1	0	0	1	1	0	1	1	0	1	0	0	0	1	0	1	1	0	0	1	0	1	1	0	0	1	1	0	1	1	0	1	0	0	0	1	0
O00148;O00148-2;O00148-3	O00148;O00148-2;O00148-3	29;22;19	13;11;9	13;11;9	ATP-dependent RNA helicase DDX39A	DDX39A	sp|O00148|DX39A_HUMAN ATP-dependent RNA helicase DDX39A OS=Homo sapiens OX=9606 GN=DDX39A PE=1 SV=2;sp|O00148-2|DX39A_HUMAN Isoform 2 of ATP-dependent RNA helicase DDX39A OS=Homo sapiens OX=9606 GN=DDX39A;sp|O00148-3|DX39A_HUMAN Isoform 3 of ATP-dependent	3	29	13	13	19	20	19	20	19	21	18	22	20	19	25	24	18	17	24	22	19	17	20	21	19	19	8	8	7	8	7	8	7	9	8	9	12	11	7	7	10	9
O00154-4;O00154-6;O00154-7;O00154;O00154-5;O00154-2;O00154-3;Q6ZUV0	O00154-4;O00154-6;O00154-7;O00154;O00154-5;O00154-2;O00154-3	17;16;16;16;15;13;13;1	17;16;16;16;15;13;13;1	17;16;16;16;15;13;13;1	Cytosolic acyl coenzyme A thioester hydrolase	ACOT7	sp|O00154-4|BACH_HUMAN Isoform 4 of Cytosolic acyl coenzyme A thioester hydrolase OS=Homo sapiens OX=9606 GN=ACOT7;sp|O00154-6|BACH_HUMAN Isoform 6 of Cytosolic acyl coenzyme A thioester hydrolase OS=Homo sapiens OX=9606 GN=ACOT7;sp|O00154-7|BACH_HUMAN Iso	8	17	17	17	14	15	12	11	10	11	9	12	9	10	15	14	12	10	15	14	15	14	10	9	14	14	14	15	12	11	10	11	9	12	9	10	15	14	12	10	15	14
O00159-2;O00159-3;O00159	O00159-2;O00159-3;O00159	30;30;30	30;30;30	30;30;30	Unconventional myosin-Ic	MYO1C	sp|O00159-2|MYO1C_HUMAN Isoform 2 of Unconventional myosin-Ic OS=Homo sapiens OX=9606 GN=MYO1C;sp|O00159-3|MYO1C_HUMAN Isoform 3 of Unconventional myosin-Ic OS=Homo sapiens OX=9606 GN=MYO1C;sp|O00159|MYO1C_HUMAN Unconventional myosin-Ic OS=Homo sapiens OX=	3	30	30	30	16	15	13	10	12	12	11	12	10	10	17	17	10	12	17	15	9	14	10	12	18	18	16	15	13	10	12	12	11	12	10	10	17	17	10	12	17	15
O00161;O00161-2	O00161;O00161-2	12;7	12;7	12;7	Synaptosomal-associated protein 23	SNAP23	sp|O00161|SNP23_HUMAN Synaptosomal-associated protein 23 OS=Homo sapiens OX=9606 GN=SNAP23 PE=1 SV=1;sp|O00161-2|SNP23_HUMAN Isoform SNAP-23b of Synaptosomal-associated protein 23 OS=Homo sapiens OX=9606 GN=SNAP23	2	12	12	12	4	6	9	8	8	7	8	8	7	8	7	7	10	9	9	8	7	9	9	9	9	7	4	6	9	8	8	7	8	8	7	8	7	7	10	9	9	8
O00165-5;O00165-3;O00165;O00165-2	O00165-5;O00165-3;O00165;O00165-2	2;2;2;2	2;2;2;2	2;2;2;2	HCLS1-associated protein X-1	HAX1	sp|O00165-5|HAX1_HUMAN Isoform 5 of HCLS1-associated protein X-1 OS=Homo sapiens OX=9606 GN=HAX1;sp|O00165-3|HAX1_HUMAN Isoform 3 of HCLS1-associated protein X-1 OS=Homo sapiens OX=9606 GN=HAX1;sp|O00165|HAX1_HUMAN HCLS1-associated protein X-1 OS=Homo sapi	4	2	2	2	0	0	1	1	1	1	1	0	1	1	1	1	1	0	0	0	0	1	0	0	0	0	0	0	1	1	1	1	1	0	1	1	1	1	1	0	0	0
O00170	O00170	25	25	25	AH receptor-interacting protein	AIP	sp|O00170|AIP_HUMAN AH receptor-interacting protein OS=Homo sapiens OX=9606 GN=AIP PE=1 SV=2	1	25	25	25	16	17	19	17	20	19	22	20	21	21	19	17	18	17	18	16	15	16	21	20	17	17	16	17	19	17	20	19	22	20	21	21	19	17	18	17	18	16
O00178	O00178	14	14	14	GTP-binding protein 1	GTPBP1	sp|O00178|GTPB1_HUMAN GTP-binding protein 1 OS=Homo sapiens OX=9606 GN=GTPBP1 PE=1 SV=3	1	14	14	14	11	6	12	12	13	13	14	12	9	12	12	11	8	8	9	6	6	6	8	9	10	9	11	6	12	12	13	13	14	12	9	12	12	11	8	8	9	6
O00186	O00186	6	6	6	Syntaxin-binding protein 3	STXBP3	sp|O00186|STXB3_HUMAN Syntaxin-binding protein 3 OS=Homo sapiens OX=9606 GN=STXBP3 PE=1 SV=2	1	6	6	6	3	2	0	2	1	1	1	1	1	1	2	1	1	1	1	1	1	1	1	1	2	1	3	2	0	2	1	1	1	1	1	1	2	1	1	1	1	1
O00193	O00193	3	3	3	Small acidic protein	SMAP	sp|O00193|SMAP_HUMAN Small acidic protein OS=Homo sapiens OX=9606 GN=SMAP PE=1 SV=1	1	3	3	3	1	0	2	3	2	2	2	2	2	2	2	3	3	2	2	2	2	3	2	2	1	2	1	0	2	3	2	2	2	2	2	2	2	3	3	2	2	2
O00203;O00203-3;Q13367;Q13367-4;Q13367-3	O00203;O00203-3	30;29;4;4;3	30;29;4;4;3	30;29;4;4;3	AP-3 complex subunit beta-1	AP3B1	sp|O00203|AP3B1_HUMAN AP-3 complex subunit beta-1 OS=Homo sapiens OX=9606 GN=AP3B1 PE=1 SV=3;sp|O00203-3|AP3B1_HUMAN Isoform 2 of AP-3 complex subunit beta-1 OS=Homo sapiens OX=9606 GN=AP3B1	5	30	30	30	18	16	20	19	21	21	21	19	19	20	25	23	20	17	20	18	13	13	14	15	15	14	18	16	20	19	21	21	21	19	19	20	25	23	20	17	20	18
O00213-2;O00213;O00213-4;O00213-6;O00213-3;O00213-5	O00213-2;O00213;O00213-4;O00213-6;O00213-3;O00213-5	6;6;3;3;3;3	6;6;3;3;3;3	6;6;3;3;3;3	Amyloid beta A4 precursor protein-binding family B member 1	APBB1	sp|O00213-2|APBB1_HUMAN Isoform 2 of Amyloid-beta A4 precursor protein-binding family B member 1 OS=Homo sapiens OX=9606 GN=APBB1;sp|O00213|APBB1_HUMAN Amyloid-beta A4 precursor protein-binding family B member 1 OS=Homo sapiens OX=9606 GN=APBB1 PE=1 SV=2;s	6	6	6	6	2	3	4	3	2	4	2	2	0	0	1	1	1	1	2	3	0	2	2	3	1	2	2	3	4	3	2	4	2	2	0	0	1	1	1	1	2	3
O00214-2;O00214	O00214-2;O00214	3;2	3;2	3;2	Galectin-8	LGALS8	sp|O00214-2|LEG8_HUMAN Isoform 2 of Galectin-8 OS=Homo sapiens OX=9606 GN=LGALS8;sp|O00214|LEG8_HUMAN Galectin-8 OS=Homo sapiens OX=9606 GN=LGALS8 PE=1 SV=4	2	3	3	3	1	0	3	2	1	3	2	0	1	3	2	2	3	2	0	0	2	0	1	1	1	1	1	0	3	2	1	3	2	0	1	3	2	2	3	2	0	0
O00217	O00217	8	8	8	NADH dehydrogenase [ubiquinone] iron-sulfur protein 8, mitochondrial	NDUFS8	sp|O00217|NDUS8_HUMAN NADH dehydrogenase [ubiquinone] iron-sulfur protein 8, mitochondrial OS=Homo sapiens OX=9606 GN=NDUFS8 PE=1 SV=1	1	8	8	8	3	5	6	4	6	7	5	5	6	6	5	5	6	6	4	4	3	4	4	5	6	7	3	5	6	4	6	7	5	5	6	6	5	5	6	6	4	4
O00231;O00231-2	O00231;O00231-2	29;29	29;29	29;29	26S proteasome non-ATPase regulatory subunit 11	PSMD11	sp|O00231|PSD11_HUMAN 26S proteasome non-ATPase regulatory subunit 11 OS=Homo sapiens OX=9606 GN=PSMD11 PE=1 SV=3;sp|O00231-2|PSD11_HUMAN Isoform 2 of 26S proteasome non-ATPase regulatory subunit 11 OS=Homo sapiens OX=9606 GN=PSMD11	2	29	29	29	25	22	23	20	21	21	17	18	15	20	24	24	20	16	26	23	19	20	16	17	23	22	25	22	23	20	21	21	17	18	15	20	24	24	20	16	26	23
O00232;O00232-2	O00232;O00232-2	30;28	30;28	30;28	26S proteasome non-ATPase regulatory subunit 12	PSMD12	sp|O00232|PSD12_HUMAN 26S proteasome non-ATPase regulatory subunit 12 OS=Homo sapiens OX=9606 GN=PSMD12 PE=1 SV=3;sp|O00232-2|PSD12_HUMAN Isoform 2 of 26S proteasome non-ATPase regulatory subunit 12 OS=Homo sapiens OX=9606 GN=PSMD12	2	30	30	30	13	14	17	16	20	19	15	18	18	17	23	24	19	16	20	17	16	16	16	18	18	16	13	14	17	16	20	19	15	18	18	17	23	24	19	16	20	17
O00233;O00233-2;O00233-3	O00233;O00233-2	10;9;2	10;9;2	10;9;2	26S proteasome non-ATPase regulatory subunit 9	PSMD9	sp|O00233|PSMD9_HUMAN 26S proteasome non-ATPase regulatory subunit 9 OS=Homo sapiens OX=9606 GN=PSMD9 PE=1 SV=3;sp|O00233-2|PSMD9_HUMAN Isoform p27-S of 26S proteasome non-ATPase regulatory subunit 9 OS=Homo sapiens OX=9606 GN=PSMD9	3	10	10	10	9	7	9	7	6	6	6	7	4	6	6	8	5	4	7	9	8	10	3	4	7	7	9	7	9	7	6	6	6	7	4	6	6	8	5	4	7	9
O00244	O00244	8	8	8	Copper transport protein ATOX1	ATOX1	sp|O00244|ATOX1_HUMAN Copper transport protein ATOX1 OS=Homo sapiens OX=9606 GN=ATOX1 PE=1 SV=1	1	8	8	8	8	7	8	8	7	8	8	8	8	7	8	8	7	8	8	7	7	8	8	8	8	8	8	7	8	8	7	8	8	8	8	7	8	8	7	8	8	7
O00257;O00257-3	O00257;O00257-3	3;2	3;2	3;2	E3 SUMO-protein ligase CBX4	CBX4	sp|O00257|CBX4_HUMAN E3 SUMO-protein ligase CBX4 OS=Homo sapiens OX=9606 GN=CBX4 PE=1 SV=3;sp|O00257-3|CBX4_HUMAN Isoform 2 of E3 SUMO-protein ligase CBX4 OS=Homo sapiens OX=9606 GN=CBX4	2	3	3	3	1	1	2	2	2	2	2	2	2	1	3	3	2	2	1	1	1	1	2	2	2	2	1	1	2	2	2	2	2	2	2	1	3	3	2	2	1	1
O00258-2;O00258	O00258-2;O00258	2;2	2;2	2;2	Tail-anchored protein insertion receptor WRB	WRB	sp|O00258-2|GET1_HUMAN Isoform 2 of Guided entry of tail-anchored proteins factor 1 OS=Homo sapiens OX=9606 GN=GET1;sp|O00258|GET1_HUMAN Guided entry of tail-anchored proteins factor 1 OS=Homo sapiens OX=9606 GN=GET1 PE=1 SV=2	2	2	2	2	0	0	2	1	2	0	2	1	1	1	0	0	0	0	0	0	0	0	2	2	0	0	0	0	2	1	2	0	2	1	1	1	0	0	0	0	0	0
O00264;O00264-2	O00264;O00264-2	11;9	11;9	11;9	Membrane-associated progesterone receptor component 1	PGRMC1	sp|O00264|PGRC1_HUMAN Membrane-associated progesterone receptor component 1 OS=Homo sapiens OX=9606 GN=PGRMC1 PE=1 SV=3;sp|O00264-2|PGRC1_HUMAN Isoform 2 of Membrane-associated progesterone receptor component 1 OS=Homo sapiens OX=9606 GN=PGRMC1	2	11	11	11	5	6	6	5	6	7	6	6	5	6	4	4	4	4	5	5	4	4	6	5	5	6	5	6	6	5	6	7	6	6	5	6	4	4	4	4	5	5
O00267-2;O00267	O00267-2;O00267	43;43	43;43	43;43	Transcription elongation factor SPT5	SUPT5H	sp|O00267-2|SPT5H_HUMAN Isoform 2 of Transcription elongation factor SPT5 OS=Homo sapiens OX=9606 GN=SUPT5H;sp|O00267|SPT5H_HUMAN Transcription elongation factor SPT5 OS=Homo sapiens OX=9606 GN=SUPT5H PE=1 SV=1	2	43	43	43	22	23	25	23	24	29	30	27	29	27	33	31	26	26	31	29	18	21	24	24	27	25	22	23	25	23	24	29	30	27	29	27	33	31	26	26	31	29
O00268	O00268	1	1	1	Transcription initiation factor TFIID subunit 4	TAF4	sp|O00268|TAF4_HUMAN Transcription initiation factor TFIID subunit 4 OS=Homo sapiens OX=9606 GN=TAF4 PE=1 SV=2	1	1	1	1	0	0	0	0	1	1	1	1	0	1	0	0	0	0	0	0	0	0	1	1	0	0	0	0	0	0	1	1	1	1	0	1	0	0	0	0	0	0
O00273	O00273	18	18	4	DNA fragmentation factor subunit alpha	DFFA	sp|O00273|DFFA_HUMAN DNA fragmentation factor subunit alpha OS=Homo sapiens OX=9606 GN=DFFA PE=1 SV=1	1	18	18	4	12	11	14	9	13	12	11	11	12	11	12	12	11	11	11	10	8	10	11	10	11	11	12	11	14	9	13	12	11	11	12	11	12	12	11	11	11	10
O00273-2	O00273-2	15	1	1	DNA fragmentation factor subunit alpha	DFFA	sp|O00273-2|DFFA_HUMAN Isoform DFF35 of DNA fragmentation factor subunit alpha OS=Homo sapiens OX=9606 GN=DFFA	1	15	1	1	10	9	10	6	9	8	7	7	8	7	11	10	9	9	10	8	7	9	8	7	9	10	0	0	0	0	0	0	0	0	0	0	1	1	1	1	1	0
O00287	O00287	1	1	1	Regulatory factor X-associated protein	RFXAP	sp|O00287|RFXAP_HUMAN Regulatory factor X-associated protein OS=Homo sapiens OX=9606 GN=RFXAP PE=1 SV=1	1	1	1	1	0	0	1	1	1	1	1	1	1	1	0	0	0	0	0	0	0	0	1	1	0	0	0	0	1	1	1	1	1	1	1	1	0	0	0	0	0	0
O00291-3;O00291-4;O00291	O00291-3;O00291-4;O00291	10;10;10	10;10;10	10;10;10	Huntingtin-interacting protein 1	HIP1	sp|O00291-3|HIP1_HUMAN Isoform 3 of Huntingtin-interacting protein 1 OS=Homo sapiens OX=9606 GN=HIP1;sp|O00291-4|HIP1_HUMAN Isoform 4 of Huntingtin-interacting protein 1 OS=Homo sapiens OX=9606 GN=HIP1;sp|O00291|HIP1_HUMAN Huntingtin-interacting protein 1	3	10	10	10	3	0	4	5	5	5	5	4	6	5	6	4	5	5	5	3	1	4	6	6	2	3	3	0	4	5	5	5	5	4	6	5	6	4	5	5	5	3
O00299	O00299	21	21	21	Chloride intracellular channel protein 1	CLIC1	sp|O00299|CLIC1_HUMAN Chloride intracellular channel protein 1 OS=Homo sapiens OX=9606 GN=CLIC1 PE=1 SV=4	1	21	21	21	16	18	13	13	12	13	12	10	10	9	16	16	14	15	16	16	16	13	9	11	18	16	16	18	13	13	12	13	12	10	10	9	16	16	14	15	16	16
O00303	O00303	13	13	13	Eukaryotic translation initiation factor 3 subunit F	EIF3F	sp|O00303|EIF3F_HUMAN Eukaryotic translation initiation factor 3 subunit F OS=Homo sapiens OX=9606 GN=EIF3F PE=1 SV=1	1	13	13	13	11	11	7	10	8	5	8	5	8	5	11	11	7	7	11	10	10	10	8	9	10	10	11	11	7	10	8	5	8	5	8	5	11	11	7	7	11	10
O00329;O00329-2	O00329	24;6	24;6	24;6	Phosphatidylinositol 4,5-bisphosphate 3-kinase catalytic subunit delta isoform	PIK3CD	sp|O00329|PK3CD_HUMAN Phosphatidylinositol 4,5-bisphosphate 3-kinase catalytic subunit delta isoform OS=Homo sapiens OX=9606 GN=PIK3CD PE=1 SV=2	2	24	24	24	13	11	15	18	16	15	16	15	14	16	16	18	14	13	11	9	9	6	8	12	8	6	13	11	15	18	16	15	16	15	14	16	16	18	14	13	11	9
O00330;O00330-3;O00330-2	O00330;O00330-3	5;5;1	5;5;1	5;5;1	Pyruvate dehydrogenase protein X component, mitochondrial	PDHX	sp|O00330|ODPX_HUMAN Pyruvate dehydrogenase protein X component, mitochondrial OS=Homo sapiens OX=9606 GN=PDHX PE=1 SV=3;sp|O00330-3|ODPX_HUMAN Isoform 3 of Pyruvate dehydrogenase protein X component, mitochondrial OS=Homo sapiens OX=9606 GN=PDHX	3	5	5	5	3	2	4	2	3	3	4	4	4	3	4	5	5	5	2	1	1	1	2	5	3	2	3	2	4	2	3	3	4	4	4	3	4	5	5	5	2	1
O00399	O00399	3	3	3	Dynactin subunit 6	DCTN6	sp|O00399|DCTN6_HUMAN Dynactin subunit 6 OS=Homo sapiens OX=9606 GN=DCTN6 PE=1 SV=1	1	3	3	3	2	1	3	2	2	2	1	2	1	1	2	3	2	2	2	2	1	3	2	2	2	1	2	1	3	2	2	2	1	2	1	1	2	3	2	2	2	2
O00400	O00400	1	1	1	Acetyl-coenzyme A transporter 1	SLC33A1	sp|O00400|ACATN_HUMAN Acetyl-coenzyme A transporter 1 OS=Homo sapiens OX=9606 GN=SLC33A1 PE=1 SV=1	1	1	1	1	1	0	1	1	1	1	1	1	1	1	1	1	1	1	1	0	0	0	0	1	1	0	1	0	1	1	1	1	1	1	1	1	1	1	1	1	1	0
O00401	O00401	15	15	14	Neural Wiskott-Aldrich syndrome protein	WASL	sp|O00401|WASL_HUMAN Neural Wiskott-Aldrich syndrome protein OS=Homo sapiens OX=9606 GN=WASL PE=1 SV=2	1	15	15	14	4	5	8	10	9	11	9	8	10	8	7	8	8	9	4	7	5	8	10	9	7	7	4	5	8	10	9	11	9	8	10	8	7	8	8	9	4	7
O00410-3;O00410;O00410-2	O00410-3;O00410;O00410-2	48;48;44	48;48;44	46;46;42	Importin-5	IPO5	sp|O00410-3|IPO5_HUMAN Isoform 3 of Importin-5 OS=Homo sapiens OX=9606 GN=IPO5;sp|O00410|IPO5_HUMAN Importin-5 OS=Homo sapiens OX=9606 GN=IPO5 PE=1 SV=4;sp|O00410-2|IPO5_HUMAN Isoform 2 of Importin-5 OS=Homo sapiens OX=9606 GN=IPO5	3	48	48	46	36	36	37	39	35	36	31	31	32	31	42	41	33	35	41	41	34	39	29	33	40	35	36	36	37	39	35	36	31	31	32	31	42	41	33	35	41	41
O00411	O00411	6	6	6	DNA-directed RNA polymerase, mitochondrial	POLRMT	sp|O00411|RPOM_HUMAN DNA-directed RNA polymerase, mitochondrial OS=Homo sapiens OX=9606 GN=POLRMT PE=1 SV=2	1	6	6	6	0	0	1	2	2	2	1	0	0	0	1	1	1	1	1	1	0	3	5	4	2	1	0	0	1	2	2	2	1	0	0	0	1	1	1	1	1	1
O00422-2;O00422	O00422-2;O00422	4;3	4;3	4;3	Histone deacetylase complex subunit SAP18	SAP18	sp|O00422-2|SAP18_HUMAN Isoform 2 of Histone deacetylase complex subunit SAP18 OS=Homo sapiens OX=9606 GN=SAP18;sp|O00422|SAP18_HUMAN Histone deacetylase complex subunit SAP18 OS=Homo sapiens OX=9606 GN=SAP18 PE=1 SV=1	2	4	4	4	3	3	2	2	1	1	1	1	1	1	1	2	2	1	3	3	2	1	1	1	1	1	3	3	2	2	1	1	1	1	1	1	1	2	2	1	3	3
O00425;O00425-2;Q9NZI8-2;Q9NZI8	O00425	25;9;2;2	25;9;2;2	24;8;1;1	Insulin-like growth factor 2 mRNA-binding protein 3	IGF2BP3	sp|O00425|IF2B3_HUMAN Insulin-like growth factor 2 mRNA-binding protein 3 OS=Homo sapiens OX=9606 GN=IGF2BP3 PE=1 SV=2	4	25	25	24	16	15	14	16	14	16	15	17	14	14	16	15	14	13	17	16	17	17	12	15	21	19	16	15	14	16	14	16	15	17	14	14	16	15	14	13	17	16
O00429;O00429-3;O00429-6;O00429-5;O00429-7	O00429;O00429-3;O00429-6;O00429-5;O00429-7	38;37;37;36;27	38;37;37;36;27	1;1;1;0;1	Dynamin-1-like protein	DNM1L	sp|O00429|DNM1L_HUMAN Dynamin-1-like protein OS=Homo sapiens OX=9606 GN=DNM1L PE=1 SV=2;sp|O00429-3|DNM1L_HUMAN Isoform 2 of Dynamin-1-like protein OS=Homo sapiens OX=9606 GN=DNM1L;sp|O00429-6|DNM1L_HUMAN Isoform 6 of Dynamin-1-like protein OS=Homo sapiens	5	38	38	1	25	22	29	29	27	28	29	29	28	29	29	31	29	26	26	19	20	23	26	25	24	27	25	22	29	29	27	28	29	29	28	29	29	31	29	26	26	19
O00429-2;O00429-8	O00429-2;O00429-8	38;37	1;1	0;0	Dynamin-1-like protein	DNM1L	sp|O00429-2|DNM1L_HUMAN Isoform 4 of Dynamin-1-like protein OS=Homo sapiens OX=9606 GN=DNM1L;sp|O00429-8|DNM1L_HUMAN Isoform 8 of Dynamin-1-like protein OS=Homo sapiens OX=9606 GN=DNM1L	2	38	1	0	24	22	29	29	27	28	29	29	28	29	29	31	29	26	26	19	19	23	26	25	24	27	0	0	1	1	1	1	1	1	1	1	1	1	1	1	1	1
O00429-4;O00429-9	O00429-4;O00429-9	38;37	1;1	1;1	Dynamin-1-like protein	DNM1L	sp|O00429-4|DNM1L_HUMAN Isoform 3 of Dynamin-1-like protein OS=Homo sapiens OX=9606 GN=DNM1L;sp|O00429-9|DNM1L_HUMAN Isoform 9 of Dynamin-1-like protein OS=Homo sapiens OX=9606 GN=DNM1L	2	38	1	1	24	22	29	29	27	28	29	29	28	29	29	31	29	26	26	20	18	22	26	25	25	27	0	0	1	1	1	1	1	1	1	1	1	1	1	1	1	1
O00442;O00442-2	O00442;O00442-2	13;12	13;12	13;12	RNA 3-terminal phosphate cyclase	RTCA	sp|O00442|RTCA_HUMAN RNA 3-terminal phosphate cyclase OS=Homo sapiens OX=9606 GN=RTCA PE=1 SV=1;sp|O00442-2|RTCA_HUMAN Isoform 2 of RNA 3-terminal phosphate cyclase OS=Homo sapiens OX=9606 GN=RTCA	2	13	13	13	9	6	9	8	8	8	8	6	9	8	10	10	6	6	9	8	5	8	7	7	8	7	9	6	9	8	8	8	8	6	9	8	10	10	6	6	9	8
O00443;O00443-2	O00443	7;3	7;3	7;3	Phosphatidylinositol 4-phosphate 3-kinase C2 domain-containing subunit alpha	PIK3C2A	sp|O00443|P3C2A_HUMAN Phosphatidylinositol 4-phosphate 3-kinase C2 domain-containing subunit alpha OS=Homo sapiens OX=9606 GN=PIK3C2A PE=1 SV=2	2	7	7	7	2	1	3	3	3	5	3	4	5	4	3	4	4	5	2	2	3	3	6	5	3	4	2	1	3	3	3	5	3	4	5	4	3	4	4	5	2	2
O00458;O00458-2	O00458;O00458-2	4;2	4;2	4;2	Interferon-related developmental regulator 1	IFRD1	sp|O00458|IFRD1_HUMAN Interferon-related developmental regulator 1 OS=Homo sapiens OX=9606 GN=IFRD1 PE=1 SV=4;sp|O00458-2|IFRD1_HUMAN Isoform 2 of Interferon-related developmental regulator 1 OS=Homo sapiens OX=9606 GN=IFRD1	2	4	4	4	1	1	2	2	2	2	2	2	2	2	1	2	1	1	2	2	1	3	2	2	4	4	1	1	2	2	2	2	2	2	2	2	1	2	1	1	2	2
O00459	O00459	5	4	4	Phosphatidylinositol 3-kinase regulatory subunit beta	PIK3R2	sp|O00459|P85B_HUMAN Phosphatidylinositol 3-kinase regulatory subunit beta OS=Homo sapiens OX=9606 GN=PIK3R2 PE=1 SV=2	1	5	4	4	3	2	3	2	3	2	3	3	3	3	2	4	4	2	3	4	0	1	2	3	3	4	2	1	2	1	2	1	2	2	2	2	1	3	3	1	2	3
O00461	O00461	9	9	9	Golgi integral membrane protein 4	GOLIM4	sp|O00461|GOLI4_HUMAN Golgi integral membrane protein 4 OS=Homo sapiens OX=9606 GN=GOLIM4 PE=1 SV=1	1	9	9	9	3	2	8	5	7	7	4	4	6	6	6	7	4	6	5	3	2	5	6	6	6	6	3	2	8	5	7	7	4	4	6	6	6	7	4	6	5	3
O00463-3;O00463;O00463-2	O00463-3;O00463;O00463-2	2;2;2	2;2;2	2;2;2	TNF receptor-associated factor 5	TRAF5	sp|O00463-3|TRAF5_HUMAN Isoform 3 of TNF receptor-associated factor 5 OS=Homo sapiens OX=9606 GN=TRAF5;sp|O00463|TRAF5_HUMAN TNF receptor-associated factor 5 OS=Homo sapiens OX=9606 GN=TRAF5 PE=1 SV=2;sp|O00463-2|TRAF5_HUMAN Isoform 2 of TNF receptor-assoc	3	2	2	2	0	0	2	2	2	2	2	2	2	2	1	1	2	2	1	1	0	0	1	2	0	0	0	0	2	2	2	2	2	2	2	2	1	1	2	2	1	1
O00468-2;O00468-6;O00468-3;O00468-5;O00468-4;O00468-7;O00468	O00468-2;O00468-6;O00468-3;O00468-5;O00468-4;O00468-7;O00468	1;1;1;1;1;1;1	1;1;1;1;1;1;1	1;1;1;1;1;1;1	Agrin;Agrin N-terminal 110 kDa subunit;Agrin C-terminal 110 kDa subunit;Agrin C-terminal 90 kDa fragment;Agrin C-terminal 22 kDa fragment	AGRN	sp|O00468-2|AGRIN_HUMAN Isoform 2 of Agrin OS=Homo sapiens OX=9606 GN=AGRN;sp|O00468-6|AGRIN_HUMAN Isoform 6 of Agrin OS=Homo sapiens OX=9606 GN=AGRN;sp|O00468-3|AGRIN_HUMAN Isoform 3 of Agrin OS=Homo sapiens OX=9606 GN=AGRN;sp|O00468-5|AGRIN_HUMAN Isoform	7	1	1	1	0	0	0	1	1	0	1	1	1	1	0	0	0	0	0	0	0	0	1	1	0	0	0	0	0	1	1	0	1	1	1	1	0	0	0	0	0	0
O00469-2;O00469;O00469-3	O00469-2;O00469	5;5;2	5;5;2	5;5;2	Procollagen-lysine,2-oxoglutarate 5-dioxygenase 2	PLOD2	sp|O00469-2|PLOD2_HUMAN Isoform 2 of Procollagen-lysine,2-oxoglutarate 5-dioxygenase 2 OS=Homo sapiens OX=9606 GN=PLOD2;sp|O00469|PLOD2_HUMAN Procollagen-lysine,2-oxoglutarate 5-dioxygenase 2 OS=Homo sapiens OX=9606 GN=PLOD2 PE=1 SV=2	3	5	5	5	1	1	2	1	3	2	3	3	1	2	1	1	2	1	1	1	0	0	1	1	3	4	1	1	2	1	3	2	3	3	1	2	1	1	2	1	1	1
O00471	O00471	7	7	7	Exocyst complex component 5	EXOC5	sp|O00471|EXOC5_HUMAN Exocyst complex component 5 OS=Homo sapiens OX=9606 GN=EXOC5 PE=1 SV=1	1	7	7	7	2	1	5	4	5	4	3	3	4	4	2	3	3	3	1	3	1	0	5	5	3	2	2	1	5	4	5	4	3	3	4	4	2	3	3	3	1	3
O00479	O00479	2	2	2	High mobility group nucleosome-binding domain-containing protein 4	HMGN4	sp|O00479|HMGN4_HUMAN High mobility group nucleosome-binding domain-containing protein 4 OS=Homo sapiens OX=9606 GN=HMGN4 PE=1 SV=3	1	2	2	2	2	2	2	2	2	2	2	2	1	2	2	2	2	2	2	2	1	2	2	2	2	2	2	2	2	2	2	2	2	2	1	2	2	2	2	2	2	2
O00483	O00483	5	5	5	Cytochrome c oxidase subunit NDUFA4	NDUFA4	sp|O00483|NDUA4_HUMAN Cytochrome c oxidase subunit NDUFA4 OS=Homo sapiens OX=9606 GN=NDUFA4 PE=1 SV=1	1	5	5	5	3	3	4	2	2	4	3	3	2	3	3	3	4	4	2	3	3	2	2	2	1	2	3	3	4	2	2	4	3	3	2	3	3	3	4	4	2	3
O00487	O00487	16	16	16	26S proteasome non-ATPase regulatory subunit 14	PSMD14	sp|O00487|PSDE_HUMAN 26S proteasome non-ATPase regulatory subunit 14 OS=Homo sapiens OX=9606 GN=PSMD14 PE=1 SV=1	1	16	16	16	9	9	9	10	13	11	12	11	12	12	11	9	10	11	8	9	9	8	12	11	11	9	9	9	9	10	13	11	12	11	12	12	11	9	10	11	8	9
O00488	O00488	7	7	7	Zinc finger protein 593	ZNF593	sp|O00488|ZN593_HUMAN Zinc finger protein 593 OS=Homo sapiens OX=9606 GN=ZNF593 PE=1 SV=2	1	7	7	7	5	4	6	5	5	5	5	4	5	4	4	4	4	4	5	5	3	4	5	4	4	6	5	4	6	5	5	5	5	4	5	4	4	4	4	4	5	5
O00505	O00505	13	13	11	Importin subunit alpha-4	KPNA3	sp|O00505|IMA4_HUMAN Importin subunit alpha-4 OS=Homo sapiens OX=9606 GN=KPNA3 PE=1 SV=2	1	13	13	11	6	6	8	10	9	8	10	9	9	8	11	10	9	7	9	9	8	9	6	7	7	7	6	6	8	10	9	8	10	9	9	8	11	10	9	7	9	9
O00533;O00533-2	O00533;O00533-2	1;1	1;1	1;1	Neural cell adhesion molecule L1-like protein;Processed neural cell adhesion molecule L1-like protein	CHL1	sp|O00533|NCHL1_HUMAN Neural cell adhesion molecule L1-like protein OS=Homo sapiens OX=9606 GN=CHL1 PE=1 SV=4;sp|O00533-2|NCHL1_HUMAN Isoform 2 of Neural cell adhesion molecule L1-like protein OS=Homo sapiens OX=9606 GN=CHL1	2	1	1	1	0	0	0	0	0	0	0	0	0	1	0	0	0	0	0	0	0	0	0	0	0	0	0	0	0	0	0	0	0	0	0	1	0	0	0	0	0	0
O00541;O00541-2	O00541;O00541-2	28;27	28;27	28;27	Pescadillo homolog	PES1	sp|O00541|PESC_HUMAN Pescadillo homolog OS=Homo sapiens OX=9606 GN=PES1 PE=1 SV=1;sp|O00541-2|PESC_HUMAN Isoform 2 of Pescadillo homolog OS=Homo sapiens OX=9606 GN=PES1	2	28	28	28	20	16	14	12	15	16	14	12	14	13	14	15	12	12	14	13	17	12	12	12	18	16	20	16	14	12	15	16	14	12	14	13	14	15	12	12	14	13
O00560;O00560-3	O00560;O00560-3	20;17	20;17	3;3	Syntenin-1	SDCBP	sp|O00560|SDCB1_HUMAN Syntenin-1 OS=Homo sapiens OX=9606 GN=SDCBP PE=1 SV=1;sp|O00560-3|SDCB1_HUMAN Isoform 3 of Syntenin-1 OS=Homo sapiens OX=9606 GN=SDCBP	2	20	20	3	14	11	8	12	12	12	13	11	9	10	17	17	15	16	17	16	14	14	8	9	14	13	14	11	8	12	12	12	13	11	9	10	17	17	15	16	17	16
O00560-2	O00560-2	20	3	3	Syntenin-1	SDCBP	sp|O00560-2|SDCB1_HUMAN Isoform 2 of Syntenin-1 OS=Homo sapiens OX=9606 GN=SDCBP	1	20	3	3	12	12	9	11	11	11	13	12	9	10	16	15	15	15	16	14	15	13	8	9	13	13	0	1	2	1	1	2	2	2	1	1	2	1	2	2	2	1
O00562-2;O00562	O00562-2;O00562	6;6	6;6	6;6	Membrane-associated phosphatidylinositol transfer protein 1	PITPNM1	sp|O00562-2|PITM1_HUMAN Isoform 2 of Membrane-associated phosphatidylinositol transfer protein 1 OS=Homo sapiens OX=9606 GN=PITPNM1;sp|O00562|PITM1_HUMAN Membrane-associated phosphatidylinositol transfer protein 1 OS=Homo sapiens OX=9606 GN=PITPNM1 PE=1 SV	2	6	6	6	0	0	3	6	5	5	4	4	4	3	3	1	5	3	0	0	0	0	2	2	1	2	0	0	3	6	5	5	4	4	4	3	3	1	5	3	0	0
O00566	O00566	13	13	13	U3 small nucleolar ribonucleoprotein protein MPP10	MPHOSPH10	sp|O00566|MPP10_HUMAN U3 small nucleolar ribonucleoprotein protein MPP10 OS=Homo sapiens OX=9606 GN=MPHOSPH10 PE=1 SV=2	1	13	13	13	7	5	10	9	9	9	9	8	9	6	8	9	7	7	9	6	7	9	9	10	6	8	7	5	10	9	9	9	9	8	9	6	8	9	7	7	9	6
O00567	O00567	35	35	35	Nucleolar protein 56	NOP56	sp|O00567|NOP56_HUMAN Nucleolar protein 56 OS=Homo sapiens OX=9606 GN=NOP56 PE=1 SV=4	1	35	35	35	29	27	25	23	24	23	24	25	25	23	26	26	23	23	28	26	26	26	25	24	27	25	29	27	25	23	24	23	24	25	25	23	26	26	23	23	28	26
O00571;O00571-2;O15523-2;O15523;O15523-3;Q9NQI0-3;Q9NQI0-2;Q9NQI0-4;Q9NQI0	O00571;O00571-2;O15523-2;O15523	45;42;32;32;8;2;2;2;2	44;41;31;31;8;2;2;2;2	44;41;31;31;8;2;2;2;2	ATP-dependent RNA helicase DDX3X;ATP-dependent RNA helicase DDX3Y	DDX3X;DDX3Y	sp|O00571|DDX3X_HUMAN ATP-dependent RNA helicase DDX3X OS=Homo sapiens OX=9606 GN=DDX3X PE=1 SV=3;sp|O00571-2|DDX3X_HUMAN Isoform 2 of ATP-dependent RNA helicase DDX3X OS=Homo sapiens OX=9606 GN=DDX3X;sp|O15523-2|DDX3Y_HUMAN Isoform 2 of ATP-dependent RNA	9	45	44	44	31	32	32	28	32	31	26	29	29	31	32	33	29	26	32	30	28	27	24	29	35	33	30	31	32	28	31	31	26	29	29	31	31	32	29	26	31	29
O00584;O00584-2	O00584	3;1	3;1	3;1	Ribonuclease T2	RNASET2	sp|O00584|RNT2_HUMAN Ribonuclease T2 OS=Homo sapiens OX=9606 GN=RNASET2 PE=1 SV=2	2	3	3	3	3	1	1	1	1	0	1	1	1	1	3	3	1	1	2	3	0	0	0	0	0	0	3	1	1	1	1	0	1	1	1	1	3	3	1	1	2	3
O00625	O00625	17	17	17	Pirin	PIR	sp|O00625|PIR_HUMAN Pirin OS=Homo sapiens OX=9606 GN=PIR PE=1 SV=1	1	17	17	17	13	14	13	15	13	14	13	13	12	13	15	16	15	14	15	16	11	12	12	13	16	16	13	14	13	15	13	14	13	13	12	13	15	16	15	14	15	16
O00629	O00629	12	10	10	Importin subunit alpha-3	KPNA4	sp|O00629|IMA3_HUMAN Importin subunit alpha-3 OS=Homo sapiens OX=9606 GN=KPNA4 PE=1 SV=1	1	12	10	10	7	6	9	9	8	9	8	8	7	7	10	10	9	10	10	10	5	8	9	8	6	5	5	5	7	7	6	7	6	6	5	6	8	8	7	8	8	9
O00635	O00635	2	2	2	E3 ubiquitin-protein ligase TRIM38	TRIM38	sp|O00635|TRI38_HUMAN E3 ubiquitin-protein ligase TRIM38 OS=Homo sapiens OX=9606 GN=TRIM38 PE=1 SV=1	1	2	2	2	0	0	0	0	1	1	0	2	1	0	1	1	1	0	0	0	0	0	1	1	0	1	0	0	0	0	1	1	0	2	1	0	1	1	1	0	0	0
O00716-2;O00716	O00716-2;O00716	2;2	2;2	2;2	Transcription factor E2F3	E2F3	sp|O00716-2|E2F3_HUMAN Isoform 2 of Transcription factor E2F3 OS=Homo sapiens OX=9606 GN=E2F3;sp|O00716|E2F3_HUMAN Transcription factor E2F3 OS=Homo sapiens OX=9606 GN=E2F3 PE=1 SV=1	2	2	2	2	1	0	1	1	2	2	2	2	1	2	1	1	2	2	1	1	0	1	0	1	1	1	1	0	1	1	2	2	2	2	1	2	1	1	2	2	1	1
O00743;O00743-2;O00743-3	O00743;O00743-2;O00743-3	11;10;10	11;10;10	11;10;10	Serine/threonine-protein phosphatase 6 catalytic subunit;Serine/threonine-protein phosphatase 6 catalytic subunit, N-terminally processed	PPP6C	sp|O00743|PPP6_HUMAN Serine/threonine-protein phosphatase 6 catalytic subunit OS=Homo sapiens OX=9606 GN=PPP6C PE=1 SV=1;sp|O00743-2|PPP6_HUMAN Isoform 2 of Serine/threonine-protein phosphatase 6 catalytic subunit OS=Homo sapiens OX=9606 GN=PPP6C;sp|O00743	3	11	11	11	7	4	5	4	6	6	5	6	4	5	8	8	3	3	5	6	7	8	3	4	4	4	7	4	5	4	6	6	5	6	4	5	8	8	3	3	5	6
O00750	O00750	3	3	3	Phosphatidylinositol 4-phosphate 3-kinase C2 domain-containing subunit beta	PIK3C2B	sp|O00750|P3C2B_HUMAN Phosphatidylinositol 4-phosphate 3-kinase C2 domain-containing subunit beta OS=Homo sapiens OX=9606 GN=PIK3C2B PE=1 SV=2	1	3	3	3	1	1	2	3	3	2	2	3	3	3	2	2	3	3	1	1	0	0	1	2	2	2	1	1	2	3	3	2	2	3	3	3	2	2	3	3	1	1
O00754-2;O00754	O00754-2;O00754	15;15	15;15	15;15	Lysosomal alpha-mannosidase;Lysosomal alpha-mannosidase A peptide;Lysosomal alpha-mannosidase B peptide;Lysosomal alpha-mannosidase C peptide;Lysosomal alpha-mannosidase D peptide;Lysosomal alpha-mannosidase E peptide	MAN2B1	sp|O00754-2|MA2B1_HUMAN Isoform 2 of Lysosomal alpha-mannosidase OS=Homo sapiens OX=9606 GN=MAN2B1;sp|O00754|MA2B1_HUMAN Lysosomal alpha-mannosidase OS=Homo sapiens OX=9606 GN=MAN2B1 PE=1 SV=3	2	15	15	15	8	5	12	8	6	8	8	8	7	9	10	9	9	9	7	5	8	8	8	9	7	8	8	5	12	8	6	8	8	8	7	9	10	9	9	9	7	5
O00762;O00762-2;O00762-3;O00762-4	O00762;O00762-2;O00762-3	14;10;8;6	14;10;8;6	14;10;8;6	Ubiquitin-conjugating enzyme E2 C	UBE2C	sp|O00762|UBE2C_HUMAN Ubiquitin-conjugating enzyme E2 C OS=Homo sapiens OX=9606 GN=UBE2C PE=1 SV=1;sp|O00762-2|UBE2C_HUMAN Isoform 2 of Ubiquitin-conjugating enzyme E2 C OS=Homo sapiens OX=9606 GN=UBE2C;sp|O00762-3|UBE2C_HUMAN Isoform 3 of Ubiquitin-conjug	4	14	14	14	9	9	8	8	8	8	6	9	6	7	6	9	6	6	9	10	6	9	7	8	6	8	9	9	8	8	8	8	6	9	6	7	6	9	6	6	9	10
O00764;O00764-3;O00764-2	O00764;O00764-3;O00764-2	10;6;6	10;6;6	10;6;6	Pyridoxal kinase	PDXK	sp|O00764|PDXK_HUMAN Pyridoxal kinase OS=Homo sapiens OX=9606 GN=PDXK PE=1 SV=1;sp|O00764-3|PDXK_HUMAN Isoform 3 of Pyridoxal kinase OS=Homo sapiens OX=9606 GN=PDXK;sp|O00764-2|PDXK_HUMAN Isoform 2 of Pyridoxal kinase OS=Homo sapiens OX=9606 GN=PDXK	3	10	10	10	5	4	7	6	5	5	4	5	3	5	5	5	4	5	6	5	7	5	6	6	9	8	5	4	7	6	5	5	4	5	3	5	5	5	4	5	6	5
O00767	O00767	1	1	1	Acyl-CoA desaturase	SCD	sp|O00767|ACOD_HUMAN Acyl-CoA desaturase OS=Homo sapiens OX=9606 GN=SCD PE=1 SV=2	1	1	1	1	1	1	1	1	1	1	1	1	1	1	1	1	1	1	1	0	1	1	1	1	1	1	1	1	1	1	1	1	1	1	1	1	1	1	1	1	1	0
O14494;O14494-2	O14494;O14494-2	1;1	1;1	1;1	Lipid phosphate phosphohydrolase 1	PPAP2A	sp|O14494|PLPP1_HUMAN Phospholipid phosphatase 1 OS=Homo sapiens OX=9606 GN=PLPP1 PE=1 SV=1;sp|O14494-2|PLPP1_HUMAN Isoform 2 of Phospholipid phosphatase 1 OS=Homo sapiens OX=9606 GN=PLPP1	2	1	1	1	0	0	1	0	1	1	1	1	1	1	0	0	0	0	0	0	0	0	1	1	0	0	0	0	1	0	1	1	1	1	1	1	0	0	0	0	0	0
O14497;O14497-2;O14497-3	O14497;O14497-2;O14497-3	30;25;23	30;25;23	27;22;20	AT-rich interactive domain-containing protein 1A	ARID1A	sp|O14497|ARI1A_HUMAN AT-rich interactive domain-containing protein 1A OS=Homo sapiens OX=9606 GN=ARID1A PE=1 SV=3;sp|O14497-2|ARI1A_HUMAN Isoform 2 of AT-rich interactive domain-containing protein 1A OS=Homo sapiens OX=9606 GN=ARID1A;sp|O14497-3|ARI1A_HUM	3	30	30	27	6	6	14	16	14	20	16	16	16	14	12	13	13	14	9	10	10	12	18	18	14	15	6	6	14	16	14	20	16	16	16	14	12	13	13	14	9	10
O14519;O14519-2;O75956	O14519;O14519-2	3;2;1	3;2;1	3;2;1	Cyclin-dependent kinase 2-associated protein 1	CDK2AP1	sp|O14519|CDKA1_HUMAN Cyclin-dependent kinase 2-associated protein 1 OS=Homo sapiens OX=9606 GN=CDK2AP1 PE=1 SV=1;sp|O14519-2|CDKA1_HUMAN Isoform 2 of Cyclin-dependent kinase 2-associated protein 1 OS=Homo sapiens OX=9606 GN=CDK2AP1	3	3	3	3	1	0	1	0	1	2	2	2	1	1	0	1	0	1	1	1	1	1	1	0	0	0	1	0	1	0	1	2	2	2	1	1	0	1	0	1	1	1
O14530-2;O14530	O14530-2;O14530	7;7	7;7	7;7	Thioredoxin domain-containing protein 9	TXNDC9	sp|O14530-2|TXND9_HUMAN Isoform 2 of Thioredoxin domain-containing protein 9 OS=Homo sapiens OX=9606 GN=TXNDC9;sp|O14530|TXND9_HUMAN Thioredoxin domain-containing protein 9 OS=Homo sapiens OX=9606 GN=TXNDC9 PE=1 SV=2	2	7	7	7	6	5	4	4	4	4	4	4	4	4	4	4	4	4	5	5	2	5	4	4	3	3	6	5	4	4	4	4	4	4	4	4	4	4	4	4	5	5
O14545;O14545-2	O14545;O14545-2	2;1	2;1	2;1	TRAF-type zinc finger domain-containing protein 1	TRAFD1	sp|O14545|TRAD1_HUMAN TRAF-type zinc finger domain-containing protein 1 OS=Homo sapiens OX=9606 GN=TRAFD1 PE=1 SV=1;sp|O14545-2|TRAD1_HUMAN Isoform 2 of TRAF-type zinc finger domain-containing protein 1 OS=Homo sapiens OX=9606 GN=TRAFD1	2	2	2	2	0	0	2	2	2	2	2	2	1	1	2	1	2	1	2	2	0	1	1	1	1	1	0	0	2	2	2	2	2	2	1	1	2	1	2	1	2	2
O14548	O14548	2	2	2	Cytochrome c oxidase subunit 7A-related protein, mitochondrial	COX7A2L	sp|O14548|COX7R_HUMAN Cytochrome c oxidase subunit 7A-related protein, mitochondrial OS=Homo sapiens OX=9606 GN=COX7A2L PE=1 SV=2	1	2	2	2	2	2	2	1	1	1	1	1	0	0	2	2	1	1	2	2	2	2	0	0	1	1	2	2	2	1	1	1	1	1	0	0	2	2	1	1	2	2
O14556	O14556	12	11	11	Glyceraldehyde-3-phosphate dehydrogenase, testis-specific	GAPDHS	sp|O14556|G3PT_HUMAN Glyceraldehyde-3-phosphate dehydrogenase, testis-specific OS=Homo sapiens OX=9606 GN=GAPDHS PE=1 SV=2	1	12	11	11	9	8	11	8	7	7	7	4	6	7	8	9	7	4	9	9	6	7	6	7	9	9	8	7	10	7	7	7	7	4	6	7	8	8	6	4	8	8
O14561	O14561	4	4	4	Acyl carrier protein, mitochondrial	NDUFAB1	sp|O14561|ACPM_HUMAN Acyl carrier protein, mitochondrial OS=Homo sapiens OX=9606 GN=NDUFAB1 PE=1 SV=3	1	4	4	4	1	0	4	4	4	3	3	4	3	3	3	3	3	3	3	2	2	3	4	4	1	1	1	0	4	4	4	3	3	4	3	3	3	3	3	3	3	2
O14562	O14562	1	1	1	Ubiquitin domain-containing protein UBFD1	UBFD1	sp|O14562|UBFD1_HUMAN Ubiquitin domain-containing protein UBFD1 OS=Homo sapiens OX=9606 GN=UBFD1 PE=1 SV=2	1	1	1	1	1	0	1	0	0	0	0	1	0	0	1	1	0	0	1	1	0	1	0	0	0	0	1	0	1	0	0	0	0	1	0	0	1	1	0	0	1	1
O14576-4;O14576-3;O14576-5;O14576-2;O14576	O14576-4;O14576-3;O14576-5;O14576-2;O14576	1;1;1;1;1	1;1;1;1;1	1;1;1;1;1	Cytoplasmic dynein 1 intermediate chain 1	DYNC1I1	sp|O14576-4|DC1I1_HUMAN Isoform 4 of Cytoplasmic dynein 1 intermediate chain 1 OS=Homo sapiens OX=9606 GN=DYNC1I1;sp|O14576-3|DC1I1_HUMAN Isoform 3 of Cytoplasmic dynein 1 intermediate chain 1 OS=Homo sapiens OX=9606 GN=DYNC1I1;sp|O14576-5|DC1I1_HUMAN Isof	5	1	1	1	1	0	1	1	1	1	1	1	1	1	0	1	1	1	1	1	1	0	1	1	0	0	1	0	1	1	1	1	1	1	1	1	0	1	1	1	1	1
O14578;O14578-4;O14578-3;O14578-2	O14578;O14578-4;O14578-3	21;21;17;4	21;21;17;4	21;21;17;4	Citron Rho-interacting kinase	CIT	sp|O14578|CTRO_HUMAN Citron Rho-interacting kinase OS=Homo sapiens OX=9606 GN=CIT PE=1 SV=2;sp|O14578-4|CTRO_HUMAN Isoform 4 of Citron Rho-interacting kinase OS=Homo sapiens OX=9606 GN=CIT;sp|O14578-3|CTRO_HUMAN Isoform 3 of Citron Rho-interacting kinase O	4	21	21	21	10	8	13	15	12	15	12	9	11	13	13	15	14	12	11	7	4	3	9	9	5	7	10	8	13	15	12	15	12	9	11	13	13	15	14	12	11	7
O14579;O14579-3;O14579-2	O14579;O14579-3;O14579-2	19;16;15	19;16;15	19;16;15	Coatomer subunit epsilon	COPE	sp|O14579|COPE_HUMAN Coatomer subunit epsilon OS=Homo sapiens OX=9606 GN=COPE PE=1 SV=3;sp|O14579-3|COPE_HUMAN Isoform 3 of Coatomer subunit epsilon OS=Homo sapiens OX=9606 GN=COPE;sp|O14579-2|COPE_HUMAN Isoform 2 of Coatomer subunit epsilon OS=Homo sapien	3	19	19	19	13	13	15	16	17	16	16	16	14	16	17	16	17	16	17	15	11	10	12	12	13	13	13	13	15	16	17	16	16	16	14	16	17	16	17	16	17	15
O14617;O14617-5;O14617-4;O14617-2;O14617-3	O14617;O14617-5;O14617-4;O14617-2;O14617-3	31;31;30;27;25	31;31;30;27;25	31;31;30;27;25	AP-3 complex subunit delta-1	AP3D1	sp|O14617|AP3D1_HUMAN AP-3 complex subunit delta-1 OS=Homo sapiens OX=9606 GN=AP3D1 PE=1 SV=1;sp|O14617-5|AP3D1_HUMAN Isoform 5 of AP-3 complex subunit delta-1 OS=Homo sapiens OX=9606 GN=AP3D1;sp|O14617-4|AP3D1_HUMAN Isoform 4 of AP-3 complex subunit delta	5	31	31	31	18	21	25	25	25	25	25	24	22	24	24	24	22	21	19	19	19	18	20	25	16	17	18	21	25	25	25	25	25	24	22	24	24	24	22	21	19	19
O14618	O14618	6	6	6	Copper chaperone for superoxide dismutase	CCS	sp|O14618|CCS_HUMAN Copper chaperone for superoxide dismutase OS=Homo sapiens OX=9606 GN=CCS PE=1 SV=1	1	6	6	6	4	4	3	3	3	3	3	3	3	3	3	3	4	3	4	4	4	3	3	3	3	3	4	4	3	3	3	3	3	3	3	3	3	3	4	3	4	4
O14641	O14641	2	2	2	Segment polarity protein dishevelled homolog DVL-2	DVL2	sp|O14641|DVL2_HUMAN Segment polarity protein dishevelled homolog DVL-2 OS=Homo sapiens OX=9606 GN=DVL2 PE=1 SV=1	1	2	2	2	1	0	1	2	2	2	2	2	2	1	1	1	1	1	0	1	0	1	1	2	1	1	1	0	1	2	2	2	2	2	2	1	1	1	1	1	0	1
O14646-2;O14646;O14647-2;O14647;Q3L8U1-2;Q3L8U1-3;Q3L8U1	O14646-2;O14646	28;28;4;4;1;1;1	28;28;4;4;1;1;1	27;27;3;3;0;0;0	Chromodomain-helicase-DNA-binding protein 1	CHD1	sp|O14646-2|CHD1_HUMAN Isoform 2 of Chromodomain-helicase-DNA-binding protein 1 OS=Homo sapiens OX=9606 GN=CHD1;sp|O14646|CHD1_HUMAN Chromodomain-helicase-DNA-binding protein 1 OS=Homo sapiens OX=9606 GN=CHD1 PE=1 SV=2	7	28	28	27	8	5	17	16	17	17	17	16	17	14	18	17	17	14	12	9	7	12	13	16	15	13	8	5	17	16	17	17	17	16	17	14	18	17	17	14	12	9
O14653-2;O14653;O14653-3	O14653-2;O14653;O14653-3	7;7;6	7;7;6	7;7;6	Golgi SNAP receptor complex member 2	GOSR2	sp|O14653-2|GOSR2_HUMAN Isoform B of Golgi SNAP receptor complex member 2 OS=Homo sapiens OX=9606 GN=GOSR2;sp|O14653|GOSR2_HUMAN Golgi SNAP receptor complex member 2 OS=Homo sapiens OX=9606 GN=GOSR2 PE=1 SV=2;sp|O14653-3|GOSR2_HUMAN Isoform 3 of Golgi SNAP	3	7	7	7	3	3	5	5	5	6	5	5	6	5	6	5	5	6	6	5	2	3	5	5	4	6	3	3	5	5	5	6	5	5	6	5	6	5	5	6	6	5
O14672;O14672-2	O14672;O14672-2	11;6	11;6	11;6	Disintegrin and metalloproteinase domain-containing protein 10	ADAM10	sp|O14672|ADA10_HUMAN Disintegrin and metalloproteinase domain-containing protein 10 OS=Homo sapiens OX=9606 GN=ADAM10 PE=1 SV=1;sp|O14672-2|ADA10_HUMAN Isoform 2 of Disintegrin and metalloproteinase domain-containing protein 10 OS=Homo sapiens OX=9606 GN=	2	11	11	11	2	2	6	5	7	6	6	6	7	5	8	6	5	5	5	3	5	4	6	6	2	4	2	2	6	5	7	6	6	6	7	5	8	6	5	5	5	3
O14681;O14681-3	O14681;O14681-3	2;1	2;1	2;1	Etoposide-induced protein 2.4 homolog	EI24	sp|O14681|EI24_HUMAN Etoposide-induced protein 2.4 homolog OS=Homo sapiens OX=9606 GN=EI24 PE=1 SV=4;sp|O14681-3|EI24_HUMAN Isoform 2 of Etoposide-induced protein 2.4 homolog OS=Homo sapiens OX=9606 GN=EI24	2	2	2	2	2	0	1	1	1	1	1	1	1	1	1	1	1	0	2	1	0	0	1	1	1	0	2	0	1	1	1	1	1	1	1	1	1	1	1	0	2	1
O14717-4;O14717-5;O14717-6;O14717-3;O14717-2;O14717	O14717-4;O14717-5;O14717-6;O14717-3;O14717-2;O14717	1;1;1;1;1;1	1;1;1;1;1;1	1;1;1;1;1;1	tRNA (cytosine(38)-C(5))-methyltransferase	TRDMT1	sp|O14717-4|TRDMT_HUMAN Isoform D of tRNA (cytosine(38)-C(5))-methyltransferase OS=Homo sapiens OX=9606 GN=TRDMT1;sp|O14717-5|TRDMT_HUMAN Isoform E of tRNA (cytosine(38)-C(5))-methyltransferase OS=Homo sapiens OX=9606 GN=TRDMT1;sp|O14717-6|TRDMT_HUMAN Isof	6	1	1	1	0	0	0	0	1	0	0	0	0	0	0	0	0	0	0	0	0	0	0	0	1	1	0	0	0	0	1	0	0	0	0	0	0	0	0	0	0	0
O14727-5;O14727-3;O14727-4;O14727-2;O14727;O14727-6	O14727-5;O14727-3;O14727-4;O14727-2;O14727;O14727-6	2;2;2;2;2;1	2;2;2;2;2;1	2;2;2;2;2;1	Apoptotic protease-activating factor 1	APAF1	sp|O14727-5|APAF_HUMAN Isoform 5 of Apoptotic protease-activating factor 1 OS=Homo sapiens OX=9606 GN=APAF1;sp|O14727-3|APAF_HUMAN Isoform 3 of Apoptotic protease-activating factor 1 OS=Homo sapiens OX=9606 GN=APAF1;sp|O14727-4|APAF_HUMAN Isoform 4 of Apop	6	2	2	2	1	1	1	2	2	2	1	2	2	2	2	1	2	1	1	1	1	1	1	2	1	1	1	1	1	2	2	2	1	2	2	2	2	1	2	1	1	1
O14733;O14733-4;O14733-3;O14733-2	O14733;O14733-4;O14733-3;O14733-2	1;1;1;1	1;1;1;1	1;1;1;1	Dual specificity mitogen-activated protein kinase kinase 7	MAP2K7	sp|O14733|MP2K7_HUMAN Dual specificity mitogen-activated protein kinase kinase 7 OS=Homo sapiens OX=9606 GN=MAP2K7 PE=1 SV=2;sp|O14733-4|MP2K7_HUMAN Isoform 4 of Dual specificity mitogen-activated protein kinase kinase 7 OS=Homo sapiens OX=9606 GN=MAP2K7;s	4	1	1	1	0	0	1	1	0	0	0	1	0	0	1	1	0	1	0	0	0	1	0	1	0	0	0	0	1	1	0	0	0	1	0	0	1	1	0	1	0	0
O14737;O14737-2	O14737;O14737-2	10;7	10;7	10;7	Programmed cell death protein 5	PDCD5	sp|O14737|PDCD5_HUMAN Programmed cell death protein 5 OS=Homo sapiens OX=9606 GN=PDCD5 PE=1 SV=3;sp|O14737-2|PDCD5_HUMAN Isoform 2 of Programmed cell death protein 5 OS=Homo sapiens OX=9606 GN=PDCD5	2	10	10	10	8	8	7	5	6	7	6	5	6	6	5	5	4	4	8	7	8	7	5	7	10	9	8	8	7	5	6	7	6	5	6	6	5	5	4	4	8	7
O14744;O14744-2;O14744-5;O14744-3;O14744-4	O14744;O14744-2;O14744-5;O14744-3;O14744-4	15;13;12;10;9	15;13;12;10;9	15;13;12;10;9	Protein arginine N-methyltransferase 5;Protein arginine N-methyltransferase 5, N-terminally processed	PRMT5	sp|O14744|ANM5_HUMAN Protein arginine N-methyltransferase 5 OS=Homo sapiens OX=9606 GN=PRMT5 PE=1 SV=4;sp|O14744-2|ANM5_HUMAN Isoform 2 of Protein arginine N-methyltransferase 5 OS=Homo sapiens OX=9606 GN=PRMT5;sp|O14744-5|ANM5_HUMAN Isoform 5 of Protein a	5	15	15	15	12	11	10	10	9	10	9	8	10	8	11	12	9	8	12	12	10	11	7	10	7	11	12	11	10	10	9	10	9	8	10	8	11	12	9	8	12	12
O14745;O14745-2	O14745	13;5	13;5	13;5	Na(+)/H(+) exchange regulatory cofactor NHE-RF1	SLC9A3R1	sp|O14745|NHRF1_HUMAN Na(+)/H(+) exchange regulatory cofactor NHE-RF1 OS=Homo sapiens OX=9606 GN=SLC9A3R1 PE=1 SV=4	2	13	13	13	10	9	8	10	8	8	9	9	7	8	9	8	8	9	11	9	9	8	7	8	7	8	10	9	8	10	8	8	9	9	7	8	9	8	8	9	11	9
O14757-2;O14757-3;O14757	O14757-2;O14757-3;O14757	3;3;3	3;3;3	3;3;3	Serine/threonine-protein kinase Chk1	CHEK1	sp|O14757-2|CHK1_HUMAN Isoform 2 of Serine/threonine-protein kinase Chk1 OS=Homo sapiens OX=9606 GN=CHEK1;sp|O14757-3|CHK1_HUMAN Isoform 3 of Serine/threonine-protein kinase Chk1 OS=Homo sapiens OX=9606 GN=CHEK1;sp|O14757|CHK1_HUMAN Serine/threonine-protei	3	3	3	3	0	0	1	0	0	0	0	0	0	0	1	1	1	1	1	0	1	0	0	0	2	1	0	0	1	0	0	0	0	0	0	0	1	1	1	1	1	0
O14763-2;O14763	O14763-2;O14763	1;1	1;1	1;1	Tumor necrosis factor receptor superfamily member 10B	TNFRSF10B	sp|O14763-2|TR10B_HUMAN Isoform Short of Tumor necrosis factor receptor superfamily member 10B OS=Homo sapiens OX=9606 GN=TNFRSF10B;sp|O14763|TR10B_HUMAN Tumor necrosis factor receptor superfamily member 10B OS=Homo sapiens OX=9606 GN=TNFRSF10B PE=1 SV=2	2	1	1	1	0	0	1	1	1	1	0	0	0	1	0	1	1	1	0	0	0	0	1	0	1	0	0	0	1	1	1	1	0	0	0	1	0	1	1	1	0	0
O14773;O14773-2	O14773;O14773-2	7;5	7;5	7;5	Tripeptidyl-peptidase 1	TPP1	sp|O14773|TPP1_HUMAN Tripeptidyl-peptidase 1 OS=Homo sapiens OX=9606 GN=TPP1 PE=1 SV=2;sp|O14773-2|TPP1_HUMAN Isoform 2 of Tripeptidyl-peptidase 1 OS=Homo sapiens OX=9606 GN=TPP1	2	7	7	7	4	4	4	4	4	4	5	4	4	4	7	6	6	6	6	5	4	5	4	4	4	4	4	4	4	4	4	4	5	4	4	4	7	6	6	6	6	5
O14776;O14776-2;Q5VWI1	O14776;O14776-2	32;32;1	32;32;1	32;32;1	Transcription elongation regulator 1	TCERG1	sp|O14776|TCRG1_HUMAN Transcription elongation regulator 1 OS=Homo sapiens OX=9606 GN=TCERG1 PE=1 SV=2;sp|O14776-2|TCRG1_HUMAN Isoform 2 of Transcription elongation regulator 1 OS=Homo sapiens OX=9606 GN=TCERG1	3	32	32	32	16	18	16	20	21	20	21	16	21	22	22	23	20	21	20	16	12	18	22	20	24	19	16	18	16	20	21	20	21	16	21	22	22	23	20	21	20	16
O14777	O14777	20	20	20	Kinetochore protein NDC80 homolog	NDC80	sp|O14777|NDC80_HUMAN Kinetochore protein NDC80 homolog OS=Homo sapiens OX=9606 GN=NDC80 PE=1 SV=1	1	20	20	20	5	4	10	11	13	13	14	14	14	14	13	12	11	11	9	9	9	9	14	14	11	10	5	4	10	11	13	13	14	14	14	14	13	12	11	11	9	9
O14782	O14782	2	2	2	Kinesin-like protein KIF3C	KIF3C	sp|O14782|KIF3C_HUMAN Kinesin-like protein KIF3C OS=Homo sapiens OX=9606 GN=KIF3C PE=1 SV=3	1	2	2	2	1	0	2	1	2	2	1	1	1	1	1	1	1	1	1	0	0	1	1	1	1	1	1	0	2	1	2	2	1	1	1	1	1	1	1	1	1	0
O14787-2;O14787	O14787-2;O14787	7;6	3;3	3;3	Transportin-2	TNPO2	sp|O14787-2|TNPO2_HUMAN Isoform 2 of Transportin-2 OS=Homo sapiens OX=9606 GN=TNPO2;sp|O14787|TNPO2_HUMAN Transportin-2 OS=Homo sapiens OX=9606 GN=TNPO2 PE=1 SV=3	2	7	3	3	4	3	2	4	3	2	4	4	4	4	4	5	3	4	6	3	3	5	3	4	1	2	1	0	1	3	1	1	2	2	3	3	1	2	2	3	3	0
O14817	O14817	1	1	1	Tetraspanin-4	TSPAN4	sp|O14817|TSN4_HUMAN Tetraspanin-4 OS=Homo sapiens OX=9606 GN=TSPAN4 PE=1 SV=1	1	1	1	1	0	0	0	1	1	1	1	1	1	1	0	1	1	1	0	0	0	0	1	1	0	1	0	0	0	1	1	1	1	1	1	1	0	1	1	1	0	0
O14818;O14818-2;O14818-4;Q8TAA3-2;Q8TAA3-5;Q8TAA3	O14818;O14818-2	21;13;9;5;5;5	21;13;9;5;5;5	21;13;9;5;5;5	Proteasome subunit alpha type-7	PSMA7	sp|O14818|PSA7_HUMAN Proteasome subunit alpha type-7 OS=Homo sapiens OX=9606 GN=PSMA7 PE=1 SV=1;sp|O14818-2|PSA7_HUMAN Isoform 2 of Proteasome subunit alpha type-7 OS=Homo sapiens OX=9606 GN=PSMA7	6	21	21	21	17	16	17	14	14	15	15	15	13	13	14	15	15	15	15	14	15	14	11	13	16	17	17	16	17	14	14	15	15	15	13	13	14	15	15	15	15	14
O14828;O14828-2	O14828;O14828-2	9;8	9;8	9;8	Secretory carrier-associated membrane protein 3	SCAMP3	sp|O14828|SCAM3_HUMAN Secretory carrier-associated membrane protein 3 OS=Homo sapiens OX=9606 GN=SCAMP3 PE=1 SV=3;sp|O14828-2|SCAM3_HUMAN Isoform 2 of Secretory carrier-associated membrane protein 3 OS=Homo sapiens OX=9606 GN=SCAMP3	2	9	9	9	6	5	7	6	6	6	5	6	5	6	7	8	6	4	8	6	5	6	5	6	7	8	6	5	7	6	6	6	5	6	5	6	7	8	6	4	8	6
O14832-2;O14832	O14832-2;O14832	3;3	3;3	3;3	Phytanoyl-CoA dioxygenase, peroxisomal	PHYH	sp|O14832-2|PAHX_HUMAN Isoform 2 of Phytanoyl-CoA dioxygenase, peroxisomal OS=Homo sapiens OX=9606 GN=PHYH;sp|O14832|PAHX_HUMAN Phytanoyl-CoA dioxygenase, peroxisomal OS=Homo sapiens OX=9606 GN=PHYH PE=1 SV=1	2	3	3	3	0	0	2	1	2	2	2	2	2	3	2	1	1	1	0	0	1	0	0	2	1	0	0	0	2	1	2	2	2	2	2	3	2	1	1	1	0	0
O14874;O14874-2;O14874-3	O14874;O14874-2;O14874-3	2;1;1	2;1;1	2;1;1	[3-methyl-2-oxobutanoate dehydrogenase [lipoamide]] kinase, mitochondrial	BCKDK	sp|O14874|BCKD_HUMAN [3-methyl-2-oxobutanoate dehydrogenase [lipoamide]] kinase, mitochondrial OS=Homo sapiens OX=9606 GN=BCKDK PE=1 SV=2;sp|O14874-2|BCKD_HUMAN Isoform 2 of [3-methyl-2-oxobutanoate dehydrogenase [lipoamide]] kinase, mitochondrial OS=Homo	3	2	2	2	0	0	1	1	2	2	0	1	1	2	1	0	1	1	0	0	0	0	1	1	1	0	0	0	1	1	2	2	0	1	1	2	1	0	1	1	0	0
O14880	O14880	4	4	4	Microsomal glutathione S-transferase 3	MGST3	sp|O14880|MGST3_HUMAN Microsomal glutathione S-transferase 3 OS=Homo sapiens OX=9606 GN=MGST3 PE=1 SV=1	1	4	4	4	3	3	4	4	4	3	4	4	4	4	4	4	4	4	4	4	4	4	4	4	4	3	3	3	4	4	4	3	4	4	4	4	4	4	4	4	4	4
O14907	O14907	4	4	4	Tax1-binding protein 3	TAX1BP3	sp|O14907|TX1B3_HUMAN Tax1-binding protein 3 OS=Homo sapiens OX=9606 GN=TAX1BP3 PE=1 SV=2	1	4	4	4	3	3	2	2	2	3	2	1	2	1	3	3	2	3	4	3	3	3	3	3	3	2	3	3	2	2	2	3	2	1	2	1	3	3	2	3	4	3
O14908;O14908-2	O14908;O14908-2	18;12	18;12	18;12	PDZ domain-containing protein GIPC1	GIPC1	sp|O14908|GIPC1_HUMAN PDZ domain-containing protein GIPC1 OS=Homo sapiens OX=9606 GN=GIPC1 PE=1 SV=2;sp|O14908-2|GIPC1_HUMAN Isoform 2 of PDZ domain-containing protein GIPC1 OS=Homo sapiens OX=9606 GN=GIPC1	2	18	18	18	9	9	16	15	13	13	13	13	11	13	17	16	16	13	12	13	7	9	14	15	11	12	9	9	16	15	13	13	13	13	11	13	17	16	16	13	12	13
O14925;Q5SRD1	O14925;Q5SRD1	4;4	4;4	4;4	Mitochondrial import inner membrane translocase subunit Tim23;Putative mitochondrial import inner membrane translocase subunit Tim23B	TIMM23;TIMM23B	sp|O14925|TIM23_HUMAN Mitochondrial import inner membrane translocase subunit Tim23 OS=Homo sapiens OX=9606 GN=TIMM23 PE=1 SV=1;sp|Q5SRD1|TI23B_HUMAN Putative mitochondrial import inner membrane translocase subunit Tim23B OS=Homo sapiens OX=9606 GN=TIMM23B	2	4	4	4	1	2	1	0	1	1	1	0	1	1	3	3	1	1	3	3	2	2	1	1	1	1	1	2	1	0	1	1	1	0	1	1	3	3	1	1	3	3
O14929;O14929-2	O14929;O14929-2	15;12	15;12	15;12	Histone acetyltransferase type B catalytic subunit	HAT1	sp|O14929|HAT1_HUMAN Histone acetyltransferase type B catalytic subunit OS=Homo sapiens OX=9606 GN=HAT1 PE=1 SV=1;sp|O14929-2|HAT1_HUMAN Isoform B of Histone acetyltransferase type B catalytic subunit OS=Homo sapiens OX=9606 GN=HAT1	2	15	15	15	11	8	11	11	8	10	11	10	13	11	11	14	12	9	11	10	12	10	9	10	10	13	11	8	11	11	8	10	11	10	13	11	11	14	12	9	11	10
O14936-3;O14936-4;O14936-6;O14936-2;O14936;O14936-5	O14936-3;O14936-4;O14936-6;O14936-2;O14936;O14936-5	5;5;5;5;5;3	5;5;5;5;5;3	5;5;5;5;5;3	Peripheral plasma membrane protein CASK	CASK	sp|O14936-3|CSKP_HUMAN Isoform 3 of Peripheral plasma membrane protein CASK OS=Homo sapiens OX=9606 GN=CASK;sp|O14936-4|CSKP_HUMAN Isoform 4 of Peripheral plasma membrane protein CASK OS=Homo sapiens OX=9606 GN=CASK;sp|O14936-6|CSKP_HUMAN Isoform 6 of Peri	6	5	5	5	0	0	3	3	3	3	4	3	3	3	2	3	2	2	1	0	1	0	2	3	1	1	0	0	3	3	3	3	4	3	3	3	2	3	2	2	1	0
O14949	O14949	5	5	5	Cytochrome b-c1 complex subunit 8	UQCRQ	sp|O14949|QCR8_HUMAN Cytochrome b-c1 complex subunit 8 OS=Homo sapiens OX=9606 GN=UQCRQ PE=1 SV=4	1	5	5	5	4	4	2	2	4	2	3	3	3	3	2	3	2	2	2	1	1	2	2	0	4	4	4	4	2	2	4	2	3	3	3	3	2	3	2	2	2	1
P19105;O14950;P24844;P24844-2	P19105;O14950	13;13;6;3	13;13;6;3	13;13;6;3	Myosin regulatory light chain 12A;Myosin regulatory light chain 12B	MYL12A;MYL12B	sp|P19105|ML12A_HUMAN Myosin regulatory light chain 12A OS=Homo sapiens OX=9606 GN=MYL12A PE=1 SV=2;sp|O14950|ML12B_HUMAN Myosin regulatory light chain 12B OS=Homo sapiens OX=9606 GN=MYL12B PE=1 SV=2	4	13	13	13	10	10	11	10	8	8	8	8	9	7	12	12	10	8	13	13	11	12	8	10	10	10	10	10	11	10	8	8	8	8	9	7	12	12	10	8	13	13
O14957	O14957	1	1	1	Cytochrome b-c1 complex subunit 10	UQCR11	sp|O14957|QCR10_HUMAN Cytochrome b-c1 complex subunit 10 OS=Homo sapiens OX=9606 GN=UQCR11 PE=1 SV=1	1	1	1	1	1	1	1	1	1	1	1	1	1	1	1	1	1	1	1	1	1	1	1	1	1	1	1	1	1	1	1	1	1	1	1	1	1	1	1	1	1	1
O14964;O14964-2	O14964;O14964-2	25;23	25;23	25;23	Hepatocyte growth factor-regulated tyrosine kinase substrate	HGS	sp|O14964|HGS_HUMAN Hepatocyte growth factor-regulated tyrosine kinase substrate OS=Homo sapiens OX=9606 GN=HGS PE=1 SV=1;sp|O14964-2|HGS_HUMAN Isoform 2 of Hepatocyte growth factor-regulated tyrosine kinase substrate OS=Homo sapiens OX=9606 GN=HGS	2	25	25	25	15	11	18	17	14	14	16	14	16	12	19	19	13	15	18	19	16	16	16	15	17	16	15	11	18	17	14	14	16	14	16	12	19	19	13	15	18	19
O14965	O14965	7	7	7	Aurora kinase A	AURKA	sp|O14965|AURKA_HUMAN Aurora kinase A OS=Homo sapiens OX=9606 GN=AURKA PE=1 SV=2	1	7	7	7	1	1	3	4	4	4	2	4	4	4	6	4	3	3	3	1	2	3	3	4	4	4	1	1	3	4	4	4	2	4	4	4	6	4	3	3	3	1
O14966;O14966-3;O14966-2	O14966;O14966-3;O14966-2	2;1;1	1;1;1	1;1;1	Ras-related protein Rab-7L1	RAB29	sp|O14966|RAB7L_HUMAN Ras-related protein Rab-7L1 OS=Homo sapiens OX=9606 GN=RAB29 PE=1 SV=1;sp|O14966-3|RAB7L_HUMAN Isoform 3 of Ras-related protein Rab-7L1 OS=Homo sapiens OX=9606 GN=RAB29;sp|O14966-2|RAB7L_HUMAN Isoform 2 of Ras-related protein Rab-7L1	3	2	1	1	2	1	0	2	2	1	1	1	1	1	2	2	1	1	2	2	2	2	1	1	0	0	1	0	0	1	1	1	1	1	1	1	1	1	1	1	1	1
O14972;O14972-2	O14972;O14972-2	4;3	4;3	4;3	Down syndrome critical region protein 3	DSCR3	sp|O14972|VP26C_HUMAN Vacuolar protein sorting-associated protein 26C OS=Homo sapiens OX=9606 GN=VPS26C PE=1 SV=1;sp|O14972-2|VP26C_HUMAN Isoform 2 of Vacuolar protein sorting-associated protein 26C OS=Homo sapiens OX=9606 GN=VPS26C	2	4	4	4	0	1	3	3	2	3	2	2	2	2	4	4	3	3	4	1	3	4	4	2	2	2	0	1	3	3	2	3	2	2	2	2	4	4	3	3	4	1
O14974;O14974-5;O14974-4;O14974-3;O14974-2;O60237-4;O60237;O60237-6	O14974;O14974-5;O14974-4;O14974-3;O14974-2	21;20;20;20;18;1;1;1	21;20;20;20;18;1;1;1	21;20;20;20;18;1;1;1	Protein phosphatase 1 regulatory subunit 12A	PPP1R12A	sp|O14974|MYPT1_HUMAN Protein phosphatase 1 regulatory subunit 12A OS=Homo sapiens OX=9606 GN=PPP1R12A PE=1 SV=1;sp|O14974-5|MYPT1_HUMAN Isoform 5 of Protein phosphatase 1 regulatory subunit 12A OS=Homo sapiens OX=9606 GN=PPP1R12A;sp|O14974-4|MYPT1_HUMAN I	8	21	21	21	11	6	12	11	13	12	12	11	14	11	15	14	12	9	14	7	8	13	14	13	14	14	11	6	12	11	13	12	12	11	14	11	15	14	12	9	14	7
O14976-2;O14976	O14976-2;O14976	7;6	7;6	7;6	Cyclin-G-associated kinase	GAK	sp|O14976-2|GAK_HUMAN Isoform 2 of Cyclin-G-associated kinase OS=Homo sapiens OX=9606 GN=GAK;sp|O14976|GAK_HUMAN Cyclin-G-associated kinase OS=Homo sapiens OX=9606 GN=GAK PE=1 SV=2	2	7	7	7	1	2	4	3	3	4	3	2	3	4	3	3	2	3	2	1	0	3	3	4	3	1	1	2	4	3	3	4	3	2	3	4	3	3	2	3	2	1
O14979-3;O14979-2;O14979	O14979-3;O14979-2;O14979	19;19;17	17;17;15	17;17;15	Heterogeneous nuclear ribonucleoprotein D-like	HNRNPDL	sp|O14979-3|HNRDL_HUMAN Isoform 3 of Heterogeneous nuclear ribonucleoprotein D-like OS=Homo sapiens OX=9606 GN=HNRNPDL;sp|O14979-2|HNRDL_HUMAN Isoform 2 of Heterogeneous nuclear ribonucleoprotein D-like OS=Homo sapiens OX=9606 GN=HNRNPDL;sp|O14979|HNRDL_HU	3	19	17	17	15	15	14	14	15	15	16	15	17	13	16	17	15	15	17	16	14	16	14	15	13	14	13	13	12	12	13	13	14	13	15	11	14	15	13	13	15	14
O14980	O14980	33	33	33	Exportin-1	XPO1	sp|O14980|XPO1_HUMAN Exportin-1 OS=Homo sapiens OX=9606 GN=XPO1 PE=1 SV=1	1	33	33	33	24	22	24	22	23	23	24	23	24	25	25	25	23	19	26	24	24	22	24	23	21	23	24	22	24	22	23	23	24	23	24	25	25	25	23	19	26	24
O14981;O14981-2	O14981;O14981-2	13;9	13;9	13;9	TATA-binding protein-associated factor 172	BTAF1	sp|O14981|BTAF1_HUMAN TATA-binding protein-associated factor 172 OS=Homo sapiens OX=9606 GN=BTAF1 PE=1 SV=2;sp|O14981-2|BTAF1_HUMAN Isoform 2 of TATA-binding protein-associated factor 172 OS=Homo sapiens OX=9606 GN=BTAF1	2	13	13	13	3	2	8	7	7	6	6	5	8	6	7	6	6	6	5	2	1	5	8	8	5	6	3	2	8	7	7	6	6	5	8	6	7	6	6	6	5	2
O15013-7;O15013-4;O15013-5;O15013-6;O15013	O15013-7;O15013-4;O15013-5;O15013-6;O15013	3;3;3;3;3	3;3;3;3;3	3;3;3;3;3	Rho guanine nucleotide exchange factor 10	ARHGEF10	sp|O15013-7|ARHGA_HUMAN Isoform 3 of Rho guanine nucleotide exchange factor 10 OS=Homo sapiens OX=9606 GN=ARHGEF10;sp|O15013-4|ARHGA_HUMAN Isoform 4 of Rho guanine nucleotide exchange factor 10 OS=Homo sapiens OX=9606 GN=ARHGEF10;sp|O15013-5|ARHGA_HUMAN Is	5	3	3	3	1	1	1	2	2	2	1	2	1	2	2	2	1	1	1	1	0	0	2	2	2	2	1	1	1	2	2	2	1	2	1	2	2	2	1	1	1	1
O15014	O15014	3	3	3	Zinc finger protein 609	ZNF609	sp|O15014|ZN609_HUMAN Zinc finger protein 609 OS=Homo sapiens OX=9606 GN=ZNF609 PE=1 SV=2	1	3	3	3	0	0	1	1	2	1	2	2	2	1	0	0	0	0	0	0	0	0	2	3	0	0	0	0	1	1	2	1	2	2	2	1	0	0	0	0	0	0
O15020-2;O15020	O15020-2;O15020	15;15	3;3	3;3	Spectrin beta chain, non-erythrocytic 2	SPTBN2	sp|O15020-2|SPTN2_HUMAN Isoform 2 of Spectrin beta chain, non-erythrocytic 2 OS=Homo sapiens OX=9606 GN=SPTBN2;sp|O15020|SPTN2_HUMAN Spectrin beta chain, non-erythrocytic 2 OS=Homo sapiens OX=9606 GN=SPTBN2 PE=1 SV=3	2	15	3	3	8	8	6	9	9	8	8	12	11	9	10	9	12	6	9	7	3	7	8	8	11	9	0	1	2	3	2	1	2	3	3	3	1	2	3	2	1	1
O15027;O15027-5;O15027-2;O15027-4;O15027-3	O15027;O15027-5;O15027-2;O15027-4;O15027-3	15;15;14;14;14	15;15;14;14;14	15;15;14;14;14	Protein transport protein Sec16A	SEC16A	sp|O15027|SC16A_HUMAN Protein transport protein Sec16A OS=Homo sapiens OX=9606 GN=SEC16A PE=1 SV=4;sp|O15027-5|SC16A_HUMAN Isoform 5 of Protein transport protein Sec16A OS=Homo sapiens OX=9606 GN=SEC16A;sp|O15027-2|SC16A_HUMAN Isoform 2 of Protein transpor	5	15	15	15	2	2	6	8	9	9	9	9	9	9	9	10	8	8	3	4	4	5	8	8	9	8	2	2	6	8	9	9	9	9	9	9	9	10	8	8	3	4
O15040;O15040-2	O15040;O15040-2	2;1	2;1	2;1	Tectonin beta-propeller repeat-containing protein 2	TECPR2	sp|O15040|TCPR2_HUMAN Tectonin beta-propeller repeat-containing protein 2 OS=Homo sapiens OX=9606 GN=TECPR2 PE=1 SV=4;sp|O15040-2|TCPR2_HUMAN Isoform 2 of Tectonin beta-propeller repeat-containing protein 2 OS=Homo sapiens OX=9606 GN=TECPR2	2	2	2	2	0	0	1	2	2	2	2	2	2	2	0	0	1	1	0	0	0	0	1	2	0	0	0	0	1	2	2	2	2	2	2	2	0	0	1	1	0	0
O15042;O15042-2;O15042-3	O15042;O15042-2;O15042-3	32;32;17	32;32;17	32;32;17	U2 snRNP-associated SURP motif-containing protein	U2SURP	sp|O15042|SR140_HUMAN U2 snRNP-associated SURP motif-containing protein OS=Homo sapiens OX=9606 GN=U2SURP PE=1 SV=2;sp|O15042-2|SR140_HUMAN Isoform 2 of U2 snRNP-associated SURP motif-containing protein OS=Homo sapiens OX=9606 GN=U2SURP;sp|O15042-3|SR140_H	3	32	32	32	19	17	17	20	19	18	18	19	16	17	22	18	17	15	21	19	21	15	15	16	15	15	19	17	17	20	19	18	18	19	16	17	22	18	17	15	21	19
O15047	O15047	1	1	1	Histone-lysine N-methyltransferase SETD1A	SETD1A	sp|O15047|SET1A_HUMAN Histone-lysine N-methyltransferase SETD1A OS=Homo sapiens OX=9606 GN=SETD1A PE=1 SV=3	1	1	1	1	0	0	1	1	1	1	1	1	1	1	1	0	1	1	0	0	0	0	1	0	0	0	0	0	1	1	1	1	1	1	1	1	1	0	1	1	0	0
O15061;O15061-2;O15061-3	O15061;O15061-2	12;11;3	12;11;3	12;11;3	Synemin	SYNM	sp|O15061|SYNEM_HUMAN Synemin OS=Homo sapiens OX=9606 GN=SYNM PE=1 SV=2;sp|O15061-2|SYNEM_HUMAN Isoform 2 of Synemin OS=Homo sapiens OX=9606 GN=SYNM	3	12	12	12	0	0	1	1	2	1	2	2	1	1	1	1	1	2	0	1	4	6	8	8	5	5	0	0	1	1	2	1	2	2	1	1	1	1	1	2	0	1
O15066;O15066-2	O15066	7;3	7;3	7;3	Kinesin-like protein KIF3B;Kinesin-like protein KIF3B, N-terminally processed	KIF3B	sp|O15066|KIF3B_HUMAN Kinesin-like protein KIF3B OS=Homo sapiens OX=9606 GN=KIF3B PE=1 SV=1	2	7	7	7	1	2	3	4	5	4	5	4	3	4	3	3	3	3	0	1	1	1	4	3	2	2	1	2	3	4	5	4	5	4	3	4	3	3	3	3	0	1
O15067	O15067	45	45	45	Phosphoribosylformylglycinamidine synthase	PFAS	sp|O15067|PUR4_HUMAN Phosphoribosylformylglycinamidine synthase OS=Homo sapiens OX=9606 GN=PFAS PE=1 SV=4	1	45	45	45	29	29	31	29	34	35	32	31	33	32	36	35	32	30	34	31	27	28	29	30	29	29	29	29	31	29	34	35	32	31	33	32	36	35	32	30	34	31
O15075;O15075-2;O15075-4;O15075-3;O43602-2;O43602	O15075;O15075-2	20;19;6;5;1;1	20;19;6;5;1;1	20;19;6;5;1;1	Serine/threonine-protein kinase DCLK1	DCLK1	sp|O15075|DCLK1_HUMAN Serine/threonine-protein kinase DCLK1 OS=Homo sapiens OX=9606 GN=DCLK1 PE=1 SV=2;sp|O15075-2|DCLK1_HUMAN Isoform 1 of Serine/threonine-protein kinase DCLK1 OS=Homo sapiens OX=9606 GN=DCLK1	6	20	20	20	9	6	11	11	14	12	12	12	14	13	12	13	9	9	8	8	5	5	8	8	10	11	9	6	11	11	14	12	12	12	14	13	12	13	9	9	8	8
O15084;O15084-4;O15084-1;O15084-2	O15084;O15084-4;O15084-1;O15084-2	22;22;22;18	22;22;22;18	21;21;21;17	Serine/threonine-protein phosphatase 6 regulatory ankyrin repeat subunit A	ANKRD28	sp|O15084|ANR28_HUMAN Serine/threonine-protein phosphatase 6 regulatory ankyrin repeat subunit A OS=Homo sapiens OX=9606 GN=ANKRD28 PE=1 SV=5;sp|O15084-4|ANR28_HUMAN Isoform 4 of Serine/threonine-protein phosphatase 6 regulatory ankyrin repeat subunit A OS	4	22	22	21	7	7	14	14	14	15	14	13	11	14	11	14	12	12	10	7	6	10	14	14	7	6	7	7	14	14	14	15	14	13	11	14	11	14	12	12	10	7
O15085;O15085-2	O15085;O15085-2	8;8	8;8	8;8	Rho guanine nucleotide exchange factor 11	ARHGEF11	sp|O15085|ARHGB_HUMAN Rho guanine nucleotide exchange factor 11 OS=Homo sapiens OX=9606 GN=ARHGEF11 PE=1 SV=1;sp|O15085-2|ARHGB_HUMAN Isoform 2 of Rho guanine nucleotide exchange factor 11 OS=Homo sapiens OX=9606 GN=ARHGEF11	2	8	8	8	0	1	0	3	3	3	5	4	4	4	1	1	4	4	0	1	1	1	4	4	2	3	0	1	0	3	3	3	5	4	4	4	1	1	4	4	0	1
O15091;O15091-2;O15091-3	O15091;O15091-2;O15091-3	6;6;3	6;6;3	1;1;0	Mitochondrial ribonuclease P protein 3	KIAA0391	sp|O15091|MRPP3_HUMAN Mitochondrial ribonuclease P catalytic subunit OS=Homo sapiens OX=9606 GN=PRORP PE=1 SV=2;sp|O15091-2|MRPP3_HUMAN Isoform 2 of Mitochondrial ribonuclease P catalytic subunit OS=Homo sapiens OX=9606 GN=PRORP;sp|O15091-3|MRPP3_HUMAN Iso	3	6	6	1	1	0	2	2	2	2	2	2	3	2	4	3	2	3	2	2	2	3	3	2	2	1	1	0	2	2	2	2	2	2	3	2	4	3	2	3	2	2
O15091-4	O15091-4	6	1	1	Mitochondrial ribonuclease P protein 3	KIAA0391	sp|O15091-4|MRPP3_HUMAN Isoform 4 of Mitochondrial ribonuclease P catalytic subunit OS=Homo sapiens OX=9606 GN=PRORP	1	6	1	1	0	0	1	1	2	1	2	2	2	2	3	2	2	2	1	2	2	2	2	1	1	0	0	0	0	0	1	0	1	1	0	1	0	0	0	0	0	0
O15116	O15116	4	4	4	U6 snRNA-associated Sm-like protein LSm1	LSM1	sp|O15116|LSM1_HUMAN U6 snRNA-associated Sm-like protein LSm1 OS=Homo sapiens OX=9606 GN=LSM1 PE=1 SV=1	1	4	4	4	2	1	2	1	2	2	2	2	1	2	2	2	2	3	1	2	2	3	1	1	2	1	2	1	2	1	2	2	2	2	1	2	2	2	2	3	1	2
O15118;O15118-2	O15118;O15118-2	11;7	11;7	11;7	Niemann-Pick C1 protein	NPC1	sp|O15118|NPC1_HUMAN NPC intracellular cholesterol transporter 1 OS=Homo sapiens OX=9606 GN=NPC1 PE=1 SV=2;sp|O15118-2|NPC1_HUMAN Isoform 2 of NPC intracellular cholesterol transporter 1 OS=Homo sapiens OX=9606 GN=NPC1	2	11	11	11	7	8	11	11	10	11	9	10	8	8	11	11	10	9	11	8	8	7	9	9	6	6	7	8	11	11	10	11	9	10	8	8	11	11	10	9	11	8
O15120-2;O15120	O15120-2;O15120	1;1	1;1	1;1	1-acyl-sn-glycerol-3-phosphate acyltransferase beta	AGPAT2	sp|O15120-2|PLCB_HUMAN Isoform 2 of 1-acyl-sn-glycerol-3-phosphate acyltransferase beta OS=Homo sapiens OX=9606 GN=AGPAT2;sp|O15120|PLCB_HUMAN 1-acyl-sn-glycerol-3-phosphate acyltransferase beta OS=Homo sapiens OX=9606 GN=AGPAT2 PE=1 SV=1	2	1	1	1	0	0	0	1	0	0	0	0	0	0	0	0	0	0	0	0	0	1	0	0	1	1	0	0	0	1	0	0	0	0	0	0	0	0	0	0	0	0
O15121	O15121	2	2	2	Sphingolipid delta(4)-desaturase DES1	DEGS1	sp|O15121|DEGS1_HUMAN Sphingolipid delta(4)-desaturase DES1 OS=Homo sapiens OX=9606 GN=DEGS1 PE=1 SV=1	1	2	2	2	1	1	2	2	2	1	2	1	1	1	1	2	2	2	1	1	0	1	1	1	1	2	1	1	2	2	2	1	2	1	1	1	1	2	2	2	1	1
O15126;O15126-2	O15126;O15126-2	7;5	7;5	7;5	Secretory carrier-associated membrane protein 1	SCAMP1	sp|O15126|SCAM1_HUMAN Secretory carrier-associated membrane protein 1 OS=Homo sapiens OX=9606 GN=SCAMP1 PE=1 SV=2;sp|O15126-2|SCAM1_HUMAN Isoform 2 of Secretory carrier-associated membrane protein 1 OS=Homo sapiens OX=9606 GN=SCAMP1	2	7	7	7	4	4	4	3	4	4	4	3	3	3	5	3	2	3	6	4	5	4	3	3	4	3	4	4	4	3	4	4	4	3	3	3	5	3	2	3	6	4
O15127	O15127	4	4	4	Secretory carrier-associated membrane protein 2	SCAMP2	sp|O15127|SCAM2_HUMAN Secretory carrier-associated membrane protein 2 OS=Homo sapiens OX=9606 GN=SCAMP2 PE=1 SV=2	1	4	4	4	3	3	3	3	2	3	2	2	3	3	3	3	3	3	3	3	2	2	1	2	3	2	3	3	3	3	2	3	2	2	3	3	3	3	3	3	3	3
O15143	O15143	21	21	20	Actin-related protein 2/3 complex subunit 1B	ARPC1B	sp|O15143|ARC1B_HUMAN Actin-related protein 2/3 complex subunit 1B OS=Homo sapiens OX=9606 GN=ARPC1B PE=1 SV=3	1	21	21	20	15	15	17	16	16	17	16	16	17	17	18	19	15	15	16	13	13	13	14	14	16	11	15	15	17	16	16	17	16	16	17	17	18	19	15	15	16	13
O15144	O15144	21	21	21	Actin-related protein 2/3 complex subunit 2	ARPC2	sp|O15144|ARPC2_HUMAN Actin-related protein 2/3 complex subunit 2 OS=Homo sapiens OX=9606 GN=ARPC2 PE=1 SV=1	1	21	21	21	8	8	13	16	14	13	13	11	11	12	15	13	10	10	9	10	8	6	13	12	11	10	8	8	13	16	14	13	13	11	11	12	15	13	10	10	9	10
O15145	O15145	12	12	12	Actin-related protein 2/3 complex subunit 3	ARPC3	sp|O15145|ARPC3_HUMAN Actin-related protein 2/3 complex subunit 3 OS=Homo sapiens OX=9606 GN=ARPC3 PE=1 SV=3	1	12	12	12	9	8	9	7	7	8	8	8	9	8	11	11	10	9	8	9	7	9	8	8	6	5	9	8	9	7	7	8	8	8	9	8	11	11	10	9	8	9
O15155;O15155-2	O15155;O15155-2	2;1	2;1	2;1	BET1 homolog	BET1	sp|O15155|BET1_HUMAN BET1 homolog OS=Homo sapiens OX=9606 GN=BET1 PE=1 SV=1;sp|O15155-2|BET1_HUMAN Isoform 2 of BET1 homolog OS=Homo sapiens OX=9606 GN=BET1	2	2	2	2	2	0	1	1	1	1	1	1	1	1	2	2	2	2	2	2	2	2	2	1	2	1	2	0	1	1	1	1	1	1	1	1	2	2	2	2	2	2
O15160;O15160-2	O15160;O15160-2	13;12	13;12	13;12	DNA-directed RNA polymerases I and III subunit RPAC1	POLR1C	sp|O15160|RPAC1_HUMAN DNA-directed RNA polymerases I and III subunit RPAC1 OS=Homo sapiens OX=9606 GN=POLR1C PE=1 SV=1;sp|O15160-2|RPAC1_HUMAN Isoform 2 of DNA-directed RNA polymerases I and III subunit RPAC1 OS=Homo sapiens OX=9606 GN=POLR1C	2	13	13	13	7	7	10	5	7	6	6	6	6	7	9	9	6	6	9	10	5	9	5	4	10	8	7	7	10	5	7	6	6	6	6	7	9	9	6	6	9	10
O15162-2;O15162	O15162-2;O15162	6;6	6;6	6;6	Phospholipid scramblase 1	PLSCR1	sp|O15162-2|PLS1_HUMAN Isoform 2 of Phospholipid scramblase 1 OS=Homo sapiens OX=9606 GN=PLSCR1;sp|O15162|PLS1_HUMAN Phospholipid scramblase 1 OS=Homo sapiens OX=9606 GN=PLSCR1 PE=1 SV=1	2	6	6	6	3	3	4	3	4	4	4	3	4	5	4	4	4	4	4	3	1	5	2	3	2	2	3	3	4	3	4	4	4	3	4	5	4	4	4	4	4	3
O15164-2;O15164	O15164-2;O15164	2;2	1;1	1;1	Transcription intermediary factor 1-alpha	TRIM24	sp|O15164-2|TIF1A_HUMAN Isoform Short of Transcription intermediary factor 1-alpha OS=Homo sapiens OX=9606 GN=TRIM24;sp|O15164|TIF1A_HUMAN Transcription intermediary factor 1-alpha OS=Homo sapiens OX=9606 GN=TRIM24 PE=1 SV=3	2	2	1	1	1	0	0	0	1	1	1	1	1	1	1	2	2	0	1	0	0	1	1	1	0	1	0	0	0	0	0	0	0	0	0	0	1	1	1	0	0	0
O15173;O15173-2	O15173;O15173-2	5;5	5;5	5;5	Membrane-associated progesterone receptor component 2	PGRMC2	sp|O15173|PGRC2_HUMAN Membrane-associated progesterone receptor component 2 OS=Homo sapiens OX=9606 GN=PGRMC2 PE=1 SV=1;sp|O15173-2|PGRC2_HUMAN Isoform 2 of Membrane-associated progesterone receptor component 2 OS=Homo sapiens OX=9606 GN=PGRMC2	2	5	5	5	3	3	3	3	3	3	3	3	1	2	4	4	3	2	4	3	2	2	2	2	3	3	3	3	3	3	3	3	3	3	1	2	4	4	3	2	4	3
O15212	O15212	11	11	11	Prefoldin subunit 6	PFDN6	sp|O15212|PFD6_HUMAN Prefoldin subunit 6 OS=Homo sapiens OX=9606 GN=PFDN6 PE=1 SV=1	1	11	11	11	9	11	8	5	9	9	5	7	7	6	8	7	8	8	8	4	7	5	7	7	10	9	9	11	8	5	9	9	5	7	7	6	8	7	8	8	8	4
O15213	O15213	7	7	7	WD repeat-containing protein 46	WDR46	sp|O15213|WDR46_HUMAN WD repeat-containing protein 46 OS=Homo sapiens OX=9606 GN=WDR46 PE=1 SV=3	1	7	7	7	2	0	5	3	4	4	4	3	4	4	6	6	3	5	3	3	4	3	3	3	4	4	2	0	5	3	4	4	4	3	4	4	6	6	3	5	3	3
O15226;O15226-2	O15226;O15226-2	15;15	15;15	15;15	NF-kappa-B-repressing factor	NKRF	sp|O15226|NKRF_HUMAN NF-kappa-B-repressing factor OS=Homo sapiens OX=9606 GN=NKRF PE=1 SV=2;sp|O15226-2|NKRF_HUMAN Isoform 2 of NF-kappa-B-repressing factor OS=Homo sapiens OX=9606 GN=NKRF	2	15	15	15	3	4	8	7	8	7	8	8	7	8	10	10	6	6	6	9	4	3	5	5	6	5	3	4	8	7	8	7	8	8	7	8	10	10	6	6	6	9
O15228;O15228-2	O15228;O15228-2	3;2	3;2	3;2	Dihydroxyacetone phosphate acyltransferase	GNPAT	sp|O15228|GNPAT_HUMAN Dihydroxyacetone phosphate acyltransferase OS=Homo sapiens OX=9606 GN=GNPAT PE=1 SV=1;sp|O15228-2|GNPAT_HUMAN Isoform 2 of Dihydroxyacetone phosphate acyltransferase OS=Homo sapiens OX=9606 GN=GNPAT	2	3	3	3	0	0	1	0	2	2	1	2	2	2	2	3	2	2	1	1	0	0	2	2	0	0	0	0	1	0	2	2	1	2	2	2	2	3	2	2	1	1
O15234	O15234	2	2	2	Protein CASC3	CASC3	sp|O15234|CASC3_HUMAN Protein CASC3 OS=Homo sapiens OX=9606 GN=CASC3 PE=1 SV=2	1	2	2	2	0	1	1	1	2	1	2	2	1	2	2	1	1	2	1	1	0	2	2	2	2	2	0	1	1	1	2	1	2	2	1	2	2	1	1	2	1	1
O15235	O15235	4	4	4	28S ribosomal protein S12, mitochondrial	MRPS12	sp|O15235|RT12_HUMAN 28S ribosomal protein S12, mitochondrial OS=Homo sapiens OX=9606 GN=MRPS12 PE=1 SV=1	1	4	4	4	4	2	2	3	3	3	3	3	3	3	2	3	3	4	2	2	0	2	3	2	1	1	4	2	2	3	3	3	3	3	3	3	2	3	3	4	2	2
O15239	O15239	1	1	1	NADH dehydrogenase [ubiquinone] 1 alpha subcomplex subunit 1	NDUFA1	sp|O15239|NDUA1_HUMAN NADH dehydrogenase [ubiquinone] 1 alpha subcomplex subunit 1 OS=Homo sapiens OX=9606 GN=NDUFA1 PE=1 SV=1	1	1	1	1	1	0	0	0	1	0	0	0	0	0	1	1	1	1	0	0	1	0	0	0	1	1	1	0	0	0	1	0	0	0	0	0	1	1	1	1	0	0
O15240	O15240	1	1	1	Neurosecretory protein VGF;Neuroendocrine regulatory peptide-1;Neuroendocrine regulatory peptide-2;Antimicrobial peptide VGF[554-577]	VGF	sp|O15240|VGF_HUMAN Neurosecretory protein VGF OS=Homo sapiens OX=9606 GN=VGF PE=1 SV=2	1	1	1	1	0	0	1	0	0	0	0	0	1	1	0	0	1	1	0	0	0	0	0	0	0	0	0	0	1	0	0	0	0	0	1	1	0	0	1	1	0	0
O15258	O15258	3	3	3	Protein RER1	RER1	sp|O15258|RER1_HUMAN Protein RER1 OS=Homo sapiens OX=9606 GN=RER1 PE=1 SV=1	1	3	3	3	2	2	3	3	3	3	2	2	1	2	3	3	2	1	3	2	2	2	2	2	3	2	2	2	3	3	3	3	2	2	1	2	3	3	2	1	3	2
O15260;O15260-2;O15260-3	O15260;O15260-2;O15260-3	2;2;1	2;2;1	2;2;1	Surfeit locus protein 4	SURF4	sp|O15260|SURF4_HUMAN Surfeit locus protein 4 OS=Homo sapiens OX=9606 GN=SURF4 PE=1 SV=3;sp|O15260-2|SURF4_HUMAN Isoform 2 of Surfeit locus protein 4 OS=Homo sapiens OX=9606 GN=SURF4;sp|O15260-3|SURF4_HUMAN Isoform 3 of Surfeit locus protein 4 OS=Homo sapi	3	2	2	2	1	1	0	0	0	0	0	0	0	0	1	1	1	1	2	2	2	2	0	0	0	0	1	1	0	0	0	0	0	0	0	0	1	1	1	1	2	2
O15269;O15269-2	O15269	5;1	5;1	5;1	Serine palmitoyltransferase 1	SPTLC1	sp|O15269|SPTC1_HUMAN Serine palmitoyltransferase 1 OS=Homo sapiens OX=9606 GN=SPTLC1 PE=1 SV=1	2	5	5	5	3	1	2	2	2	2	3	3	3	3	3	2	2	1	3	3	2	1	2	3	4	3	3	1	2	2	2	2	3	3	3	3	3	2	2	1	3	3
O15270	O15270	5	5	5	Serine palmitoyltransferase 2	SPTLC2	sp|O15270|SPTC2_HUMAN Serine palmitoyltransferase 2 OS=Homo sapiens OX=9606 GN=SPTLC2 PE=1 SV=1	1	5	5	5	1	1	1	3	1	2	3	2	3	2	4	4	4	3	2	2	0	2	2	2	1	1	1	1	1	3	1	2	3	2	3	2	4	4	4	3	2	2
O15294;O15294-2;O15294-4	O15294;O15294-2;O15294-4	31;25;19	31;25;19	2;0;0	UDP-N-acetylglucosamine--peptide N-acetylglucosaminyltransferase 110 kDa subunit	OGT	sp|O15294|OGT1_HUMAN UDP-N-acetylglucosamine--peptide N-acetylglucosaminyltransferase 110 kDa subunit OS=Homo sapiens OX=9606 GN=OGT PE=1 SV=3;sp|O15294-2|OGT1_HUMAN Isoform 2 of UDP-N-acetylglucosamine--peptide N-acetylglucosaminyltransferase 110 kDa subu	3	31	31	2	13	18	21	18	20	20	19	15	20	19	22	24	18	17	19	18	17	15	15	16	16	16	13	18	21	18	20	20	19	15	20	19	22	24	18	17	19	18
O15294-3	O15294-3	30	1	1	UDP-N-acetylglucosamine--peptide N-acetylglucosaminyltransferase 110 kDa subunit	OGT	sp|O15294-3|OGT1_HUMAN Isoform 1 of UDP-N-acetylglucosamine--peptide N-acetylglucosaminyltransferase 110 kDa subunit OS=Homo sapiens OX=9606 GN=OGT	1	30	1	1	11	16	20	17	18	19	17	14	19	18	21	23	16	16	17	17	15	13	14	15	14	14	0	0	1	1	0	1	0	1	1	1	1	1	0	1	0	1
O15305	O15305	4	4	4	Phosphomannomutase 2	PMM2	sp|O15305|PMM2_HUMAN Phosphomannomutase 2 OS=Homo sapiens OX=9606 GN=PMM2 PE=1 SV=1	1	4	4	4	2	1	3	2	3	1	2	2	2	1	1	2	1	1	0	1	3	0	2	2	1	0	2	1	3	2	3	1	2	2	2	1	1	2	1	1	0	1
O15318	O15318	2	2	2	DNA-directed RNA polymerase III subunit RPC7	POLR3G	sp|O15318|RPC7_HUMAN DNA-directed RNA polymerase III subunit RPC7 OS=Homo sapiens OX=9606 GN=POLR3G PE=1 SV=2	1	2	2	2	1	0	1	2	2	1	2	2	2	2	2	2	2	2	0	1	0	0	2	2	2	1	1	0	1	2	2	1	2	2	2	2	2	2	2	2	0	1
O15321-2;O15321	O15321-2;O15321	4;4	4;4	4;4	Transmembrane 9 superfamily member 1	TM9SF1	sp|O15321-2|TM9S1_HUMAN Isoform 2 of Transmembrane 9 superfamily member 1 OS=Homo sapiens OX=9606 GN=TM9SF1;sp|O15321|TM9S1_HUMAN Transmembrane 9 superfamily member 1 OS=Homo sapiens OX=9606 GN=TM9SF1 PE=2 SV=2	2	4	4	4	1	1	3	2	2	2	3	2	2	2	2	1	2	1	2	0	0	1	2	3	2	0	1	1	3	2	2	2	3	2	2	2	2	1	2	1	2	0
O15327	O15327	9	9	9	Type II inositol 3,4-bisphosphate 4-phosphatase	INPP4B	sp|O15327|INP4B_HUMAN Inositol polyphosphate 4-phosphatase type II OS=Homo sapiens OX=9606 GN=INPP4B PE=1 SV=4	1	9	9	9	5	3	3	4	4	5	4	6	4	4	4	4	3	3	3	4	2	6	5	6	5	4	5	3	3	4	4	5	4	6	4	4	4	4	3	3	3	4
O15344;O15344-2;Q9UJV3-2;Q9UJV3	O15344;O15344-2	11;10;1;1	11;10;1;1	11;10;1;1	E3 ubiquitin-protein ligase Midline-1	MID1	sp|O15344|TRI18_HUMAN E3 ubiquitin-protein ligase Midline-1 OS=Homo sapiens OX=9606 GN=MID1 PE=1 SV=1;sp|O15344-2|TRI18_HUMAN Isoform 2 of E3 ubiquitin-protein ligase Midline-1 OS=Homo sapiens OX=9606 GN=MID1	4	11	11	11	4	4	4	6	5	4	5	7	5	5	8	5	4	4	5	5	3	4	3	1	4	4	4	4	4	6	5	4	5	7	5	5	8	5	4	4	5	5
O15347	O15347	20	20	20	High mobility group protein B3	HMGB3	sp|O15347|HMGB3_HUMAN High mobility group protein B3 OS=Homo sapiens OX=9606 GN=HMGB3 PE=1 SV=4	1	20	20	20	11	11	13	11	11	14	11	13	12	13	13	12	11	10	13	11	12	12	13	12	14	12	11	11	13	11	11	14	11	13	12	13	13	12	11	10	13	11
O15355	O15355	21	21	21	Protein phosphatase 1G	PPM1G	sp|O15355|PPM1G_HUMAN Protein phosphatase 1G OS=Homo sapiens OX=9606 GN=PPM1G PE=1 SV=1	1	21	21	21	13	12	13	17	15	14	12	15	12	12	15	15	14	10	15	17	16	14	11	12	15	15	13	12	13	17	15	14	12	15	12	12	15	15	14	10	15	17
O15357;O15357-2	O15357;O15357-2	11;8	11;8	11;8	Phosphatidylinositol 3,4,5-trisphosphate 5-phosphatase 2	INPPL1	sp|O15357|SHIP2_HUMAN Phosphatidylinositol 3,4,5-trisphosphate 5-phosphatase 2 OS=Homo sapiens OX=9606 GN=INPPL1 PE=1 SV=2;sp|O15357-2|SHIP2_HUMAN Isoform 2 of Phosphatidylinositol 3,4,5-trisphosphate 5-phosphatase 2 OS=Homo sapiens OX=9606 GN=INPPL1	2	11	11	11	4	4	6	8	7	7	6	6	7	5	6	8	5	6	3	3	0	3	8	6	4	3	4	4	6	8	7	7	6	6	7	5	6	8	5	6	3	3
O15371-2;O15371-3;O15371	O15371-2;O15371-3;O15371	29;29;29	29;29;29	29;29;29	Eukaryotic translation initiation factor 3 subunit D	EIF3D	sp|O15371-2|EIF3D_HUMAN Isoform 2 of Eukaryotic translation initiation factor 3 subunit D OS=Homo sapiens OX=9606 GN=EIF3D;sp|O15371-3|EIF3D_HUMAN Isoform 3 of Eukaryotic translation initiation factor 3 subunit D OS=Homo sapiens OX=9606 GN=EIF3D;sp|O15371|	3	29	29	29	18	21	20	23	19	21	20	20	21	21	25	24	20	18	24	23	19	20	17	16	18	17	18	21	20	23	19	21	20	20	21	21	25	24	20	18	24	23
O15372	O15372	15	15	15	Eukaryotic translation initiation factor 3 subunit H	EIF3H	sp|O15372|EIF3H_HUMAN Eukaryotic translation initiation factor 3 subunit H OS=Homo sapiens OX=9606 GN=EIF3H PE=1 SV=1	1	15	15	15	12	9	10	11	10	10	9	10	8	11	9	10	11	9	10	9	7	9	8	9	10	9	12	9	10	11	10	10	9	10	8	11	9	10	11	9	10	9
O15381-3;O15381-4;O15381-2;O15381-5;O15381	O15381-3;O15381-4;O15381-2;O15381-5;O15381	3;3;3;3;3	3;3;3;3;3	3;3;3;3;3	Nuclear valosin-containing protein-like	NVL	sp|O15381-3|NVL_HUMAN Isoform 3 of Nuclear valosin-containing protein-like OS=Homo sapiens OX=9606 GN=NVL;sp|O15381-4|NVL_HUMAN Isoform 4 of Nuclear valosin-containing protein-like OS=Homo sapiens OX=9606 GN=NVL;sp|O15381-2|NVL_HUMAN Isoform 2 of Nuclear v	5	3	3	3	0	0	2	2	1	2	2	2	2	2	2	2	3	2	1	0	0	0	1	2	2	2	0	0	2	2	1	2	2	2	2	2	2	2	3	2	1	0
O15382;O15382-2	O15382;O15382-2	12;10	12;10	12;10	Branched-chain-amino-acid aminotransferase, mitochondrial	BCAT2	sp|O15382|BCAT2_HUMAN Branched-chain-amino-acid aminotransferase, mitochondrial OS=Homo sapiens OX=9606 GN=BCAT2 PE=1 SV=2;sp|O15382-2|BCAT2_HUMAN Isoform B of Branched-chain-amino-acid aminotransferase, mitochondrial OS=Homo sapiens OX=9606 GN=BCAT2	2	12	12	12	7	6	7	8	5	7	8	7	5	7	10	8	6	5	7	7	4	4	7	8	7	7	7	6	7	8	5	7	8	7	5	7	10	8	6	5	7	7
O15392-5;O15392-4;O15392;O15392-2;O15392-7;O15392-6;O15392-3	O15392-5;O15392-4;O15392;O15392-2;O15392-7;O15392-6;O15392-3	6;6;6;6;4;4;4	6;6;6;6;4;4;4	6;6;6;6;4;4;4	Baculoviral IAP repeat-containing protein 5	BIRC5	sp|O15392-5|BIRC5_HUMAN Isoform 5 of Baculoviral IAP repeat-containing protein 5 OS=Homo sapiens OX=9606 GN=BIRC5;sp|O15392-4|BIRC5_HUMAN Isoform 4 of Baculoviral IAP repeat-containing protein 5 OS=Homo sapiens OX=9606 GN=BIRC5;sp|O15392|BIRC5_HUMAN Baculo	7	6	6	6	1	0	0	1	0	1	1	0	0	1	0	0	0	0	0	1	1	2	3	3	1	1	1	0	0	1	0	1	1	0	0	1	0	0	0	0	0	1
O15397;O15397-2	O15397;O15397-2	8;6	7;5	7;5	Importin-8	IPO8	sp|O15397|IPO8_HUMAN Importin-8 OS=Homo sapiens OX=9606 GN=IPO8 PE=1 SV=2;sp|O15397-2|IPO8_HUMAN Isoform 2 of Importin-8 OS=Homo sapiens OX=9606 GN=IPO8	2	8	7	7	2	3	4	6	5	5	4	6	6	5	6	6	7	5	5	2	0	3	5	5	4	4	2	3	4	6	5	5	4	5	6	5	5	5	6	5	4	1
O15400-2;O15400	O15400-2;O15400	15;15	15;15	15;15	Syntaxin-7	STX7	sp|O15400-2|STX7_HUMAN Isoform 2 of Syntaxin-7 OS=Homo sapiens OX=9606 GN=STX7;sp|O15400|STX7_HUMAN Syntaxin-7 OS=Homo sapiens OX=9606 GN=STX7 PE=1 SV=4	2	15	15	15	10	8	9	9	11	11	9	10	8	8	11	10	10	10	11	11	11	9	9	8	14	14	10	8	9	9	11	11	9	10	8	8	11	10	10	10	11	11
O15403	O15403	8	8	8	Monocarboxylate transporter 7	SLC16A6	sp|O15403|MOT7_HUMAN Monocarboxylate transporter 7 OS=Homo sapiens OX=9606 GN=SLC16A6 PE=1 SV=2	1	8	8	8	3	3	5	4	5	5	5	5	3	4	5	6	3	3	6	4	4	4	4	3	7	6	3	3	5	4	5	5	5	5	3	4	5	6	3	3	6	4
O15427	O15427	5	5	5	Monocarboxylate transporter 4	SLC16A3	sp|O15427|MOT4_HUMAN Monocarboxylate transporter 4 OS=Homo sapiens OX=9606 GN=SLC16A3 PE=1 SV=1	1	5	5	5	1	1	3	3	3	2	3	3	3	3	3	4	2	3	2	2	1	2	3	3	2	3	1	1	3	3	3	2	3	3	3	3	3	4	2	3	2	2
O15431	O15431	1	1	1	High affinity copper uptake protein 1	SLC31A1	sp|O15431|COPT1_HUMAN High affinity copper uptake protein 1 OS=Homo sapiens OX=9606 GN=SLC31A1 PE=1 SV=1	1	1	1	1	0	0	0	0	0	0	0	0	0	0	1	1	0	0	0	0	0	1	0	0	0	0	0	0	0	0	0	0	0	0	0	0	1	1	0	0	0	0
O15439-4;O15439-3;O15439-2;O15439	O15439-4;O15439-3;O15439-2;O15439	1;1;1;1	1;1;1;1	1;1;1;1	Multidrug resistance-associated protein 4	ABCC4	sp|O15439-4|MRP4_HUMAN Isoform 4 of Multidrug resistance-associated protein 4 OS=Homo sapiens OX=9606 GN=ABCC4;sp|O15439-3|MRP4_HUMAN Isoform 3 of Multidrug resistance-associated protein 4 OS=Homo sapiens OX=9606 GN=ABCC4;sp|O15439-2|MRP4_HUMAN Isoform 2 o	4	1	1	1	0	0	1	1	1	1	1	1	1	0	1	1	0	0	1	1	0	0	0	0	1	1	0	0	1	1	1	1	1	1	1	0	1	1	0	0	1	1
O15446;O15446-2	O15446;O15446-2	4;4	4;4	4;4	DNA-directed RNA polymerase I subunit RPA34	CD3EAP	sp|O15446|RPA34_HUMAN DNA-directed RNA polymerase I subunit RPA34 OS=Homo sapiens OX=9606 GN=POLR1G PE=1 SV=1;sp|O15446-2|RPA34_HUMAN Isoform 2 of DNA-directed RNA polymerase I subunit RPA34 OS=Homo sapiens OX=9606 GN=POLR1G	2	4	4	4	1	1	2	1	1	1	1	1	2	0	2	2	1	1	3	1	2	1	0	0	2	2	1	1	2	1	1	1	1	1	2	0	2	2	1	1	3	1
O15460-2;O15460	O15460-2;O15460	17;16	17;16	17;16	Prolyl 4-hydroxylase subunit alpha-2	P4HA2	sp|O15460-2|P4HA2_HUMAN Isoform IIa of Prolyl 4-hydroxylase subunit alpha-2 OS=Homo sapiens OX=9606 GN=P4HA2;sp|O15460|P4HA2_HUMAN Prolyl 4-hydroxylase subunit alpha-2 OS=Homo sapiens OX=9606 GN=P4HA2 PE=1 SV=1	2	17	17	17	13	10	12	10	9	9	8	9	8	9	13	14	9	10	12	13	10	12	9	9	14	14	13	10	12	10	9	9	8	9	8	9	13	14	9	10	12	13
O15498;O15498-2	O15498;O15498-2	10;5	10;5	10;5	Synaptobrevin homolog YKT6	YKT6	sp|O15498|YKT6_HUMAN Synaptobrevin homolog YKT6 OS=Homo sapiens OX=9606 GN=YKT6 PE=1 SV=1;sp|O15498-2|YKT6_HUMAN Isoform 2 of Synaptobrevin homolog YKT6 OS=Homo sapiens OX=9606 GN=YKT6	2	10	10	10	5	2	6	6	6	7	6	5	6	6	8	7	5	5	7	7	4	5	6	5	5	5	5	2	6	6	6	7	6	5	6	6	8	7	5	5	7	7
O15504;O15504-3;O15504-2	O15504;O15504-3;O15504-2	2;1;1	2;1;1	2;1;1	Nucleoporin-like protein 2	NUPL2	sp|O15504|NUP42_HUMAN Nucleoporin NUP42 OS=Homo sapiens OX=9606 GN=NUP42 PE=1 SV=1;sp|O15504-3|NUP42_HUMAN Isoform 3 of Nucleoporin NUP42 OS=Homo sapiens OX=9606 GN=NUP42;sp|O15504-2|NUP42_HUMAN Isoform 2 of Nucleoporin NUP42 OS=Homo sapiens OX=9606 GN=NUP	3	2	2	2	0	0	1	1	1	1	1	1	1	1	0	1	1	1	1	0	1	2	1	1	1	1	0	0	1	1	1	1	1	1	1	1	0	1	1	1	1	0
O15511;O15511-2	O15511;O15511-2	8;6	8;6	8;6	Actin-related protein 2/3 complex subunit 5	ARPC5	sp|O15511|ARPC5_HUMAN Actin-related protein 2/3 complex subunit 5 OS=Homo sapiens OX=9606 GN=ARPC5 PE=1 SV=3;sp|O15511-2|ARPC5_HUMAN Isoform 2 of Actin-related protein 2/3 complex subunit 5 OS=Homo sapiens OX=9606 GN=ARPC5	2	8	8	8	5	5	7	6	5	5	6	5	6	6	7	7	5	5	6	5	6	5	5	5	5	5	5	5	7	6	5	5	6	5	6	6	7	7	5	5	6	5
O15514	O15514	6	6	6	DNA-directed RNA polymerase II subunit RPB4	POLR2D	sp|O15514|RPB4_HUMAN DNA-directed RNA polymerase II subunit RPB4 OS=Homo sapiens OX=9606 GN=POLR2D PE=1 SV=1	1	6	6	6	3	2	5	4	4	4	5	5	5	5	4	4	5	5	3	3	3	4	4	5	4	3	3	2	5	4	4	4	5	5	5	5	4	4	5	5	3	3
O15533-2;O15533;O15533-3	O15533-2;O15533;O15533-3	1;1;1	1;1;1	1;1;1	Tapasin	TAPBP	sp|O15533-2|TPSN_HUMAN Isoform 2 of Tapasin OS=Homo sapiens OX=9606 GN=TAPBP;sp|O15533|TPSN_HUMAN Tapasin OS=Homo sapiens OX=9606 GN=TAPBP PE=1 SV=1;sp|O15533-3|TPSN_HUMAN Isoform 3 of Tapasin OS=Homo sapiens OX=9606 GN=TAPBP	3	1	1	1	0	1	0	0	0	1	1	0	0	0	0	0	1	0	0	0	0	0	0	0	0	0	0	1	0	0	0	1	1	0	0	0	0	0	1	0	0	0
O15540;O15540-2	O15540;O15540-2	4;4	4;4	4;4	Fatty acid-binding protein, brain	FABP7	sp|O15540|FABP7_HUMAN Fatty acid-binding protein, brain OS=Homo sapiens OX=9606 GN=FABP7 PE=1 SV=3;sp|O15540-2|FABP7_HUMAN Isoform 2 of Fatty acid-binding protein, brain OS=Homo sapiens OX=9606 GN=FABP7	2	4	4	4	4	2	3	1	1	1	1	1	1	1	4	4	2	2	4	4	1	3	1	1	4	3	4	2	3	1	1	1	1	1	1	1	4	4	2	2	4	4
O15541	O15541	5	5	5	RING finger protein 113A	RNF113A	sp|O15541|R113A_HUMAN E3 ubiquitin-protein ligase RNF113A OS=Homo sapiens OX=9606 GN=RNF113A PE=1 SV=1	1	5	5	5	3	2	3	2	2	2	2	2	1	2	2	4	4	3	4	2	2	3	3	3	2	2	3	2	3	2	2	2	2	2	1	2	2	4	4	3	4	2
O43143	O43143	39	39	38	Pre-mRNA-splicing factor ATP-dependent RNA helicase DHX15	DHX15	sp|O43143|DHX15_HUMAN Pre-mRNA-splicing factor ATP-dependent RNA helicase DHX15 OS=Homo sapiens OX=9606 GN=DHX15 PE=1 SV=2	1	39	39	38	28	26	26	27	27	29	26	27	23	23	29	30	26	26	32	29	27	24	27	26	32	30	28	26	26	27	27	29	26	27	23	23	29	30	26	26	32	29
O43148;O43148-2	O43148;O43148-2	17;17	17;17	17;17	mRNA cap guanine-N7 methyltransferase	RNMT	sp|O43148|MCES_HUMAN mRNA cap guanine-N7 methyltransferase OS=Homo sapiens OX=9606 GN=RNMT PE=1 SV=1;sp|O43148-2|MCES_HUMAN Isoform 2 of mRNA cap guanine-N7 methyltransferase OS=Homo sapiens OX=9606 GN=RNMT	2	17	17	17	10	10	11	12	13	11	10	11	11	11	14	13	11	11	12	11	9	9	11	11	10	12	10	10	11	12	13	11	10	11	11	11	14	13	11	11	12	11
O43149;O43149-3	O43149;O43149-3	2;1	2;1	2;1	Zinc finger ZZ-type and EF-hand domain-containing protein 1	ZZEF1	sp|O43149|ZZEF1_HUMAN Zinc finger ZZ-type and EF-hand domain-containing protein 1 OS=Homo sapiens OX=9606 GN=ZZEF1 PE=1 SV=6;sp|O43149-3|ZZEF1_HUMAN Isoform 3 of Zinc finger ZZ-type and EF-hand domain-containing protein 1 OS=Homo sapiens OX=9606 GN=ZZEF1	2	2	2	2	0	0	1	1	1	1	2	2	1	0	1	0	1	2	0	0	0	0	1	1	0	0	0	0	1	1	1	1	2	2	1	0	1	0	1	2	0	0
O43150-2;O43150	O43150-2;O43150	4;4	4;4	4;4	Arf-GAP with SH3 domain, ANK repeat and PH domain-containing protein 2	ASAP2	sp|O43150-2|ASAP2_HUMAN Isoform 2 of Arf-GAP with SH3 domain, ANK repeat and PH domain-containing protein 2 OS=Homo sapiens OX=9606 GN=ASAP2;sp|O43150|ASAP2_HUMAN Arf-GAP with SH3 domain, ANK repeat and PH domain-containing protein 2 OS=Homo sapiens OX=960	2	4	4	4	0	0	2	2	3	3	4	3	4	3	2	2	2	2	2	1	0	0	3	3	1	2	0	0	2	2	3	3	4	3	4	3	2	2	2	2	2	1
O43156	O43156	2	2	2	TELO2-interacting protein 1 homolog	TTI1	sp|O43156|TTI1_HUMAN TELO2-interacting protein 1 homolog OS=Homo sapiens OX=9606 GN=TTI1 PE=1 SV=3	1	2	2	2	1	0	1	1	1	1	1	1	1	1	2	2	1	0	1	0	0	1	1	1	1	2	1	0	1	1	1	1	1	1	1	1	2	2	1	0	1	0
O43159	O43159	7	7	7	Ribosomal RNA-processing protein 8	RRP8	sp|O43159|RRP8_HUMAN Ribosomal RNA-processing protein 8 OS=Homo sapiens OX=9606 GN=RRP8 PE=1 SV=2	1	7	7	7	4	4	6	5	6	6	6	6	6	4	6	6	5	3	5	5	4	4	4	5	5	4	4	4	6	5	6	6	6	6	6	4	6	6	5	3	5	5
O43164-2;O43164	O43164-2;O43164	7;7	7;7	7;7	E3 ubiquitin-protein ligase Praja-2	PJA2	sp|O43164-2|PJA2_HUMAN Isoform 2 of E3 ubiquitin-protein ligase Praja-2 OS=Homo sapiens OX=9606 GN=PJA2;sp|O43164|PJA2_HUMAN E3 ubiquitin-protein ligase Praja-2 OS=Homo sapiens OX=9606 GN=PJA2 PE=1 SV=4	2	7	7	7	1	1	6	7	7	7	7	7	7	6	3	3	5	3	2	2	0	0	4	4	2	3	1	1	6	7	7	7	7	7	7	6	3	3	5	3	2	2
O43166-3;O43166-2;O43166	O43166-3;O43166-2;O43166	2;2;2	2;2;2	2;2;2	Signal-induced proliferation-associated 1-like protein 1	SIPA1L1	sp|O43166-3|SI1L1_HUMAN Isoform 3 of Signal-induced proliferation-associated 1-like protein 1 OS=Homo sapiens OX=9606 GN=SIPA1L1;sp|O43166-2|SI1L1_HUMAN Isoform 2 of Signal-induced proliferation-associated 1-like protein 1 OS=Homo sapiens OX=9606 GN=SIPA1L	3	2	2	2	0	0	2	1	1	1	1	1	1	1	0	0	1	1	0	0	0	0	1	1	2	0	0	0	2	1	1	1	1	1	1	1	0	0	1	1	0	0
O43169	O43169	3	3	3	Cytochrome b5 type B	CYB5B	sp|O43169|CYB5B_HUMAN Cytochrome b5 type B OS=Homo sapiens OX=9606 GN=CYB5B PE=1 SV=3	1	3	3	3	2	2	2	3	3	2	3	2	2	1	3	3	3	2	3	2	3	2	1	2	2	2	2	2	2	3	3	2	3	2	2	1	3	3	3	2	3	2
O43172-2;O43172	O43172-2;O43172	28;28	28;28	28;28	U4/U6 small nuclear ribonucleoprotein Prp4	PRPF4	sp|O43172-2|PRP4_HUMAN Isoform 2 of U4/U6 small nuclear ribonucleoprotein Prp4 OS=Homo sapiens OX=9606 GN=PRPF4;sp|O43172|PRP4_HUMAN U4/U6 small nuclear ribonucleoprotein Prp4 OS=Homo sapiens OX=9606 GN=PRPF4 PE=1 SV=2	2	28	28	28	17	19	19	20	18	20	19	19	18	18	20	23	16	16	23	20	24	23	20	18	19	18	17	19	19	20	18	20	19	19	18	18	20	23	16	16	23	20
O43175	O43175	32	32	32	D-3-phosphoglycerate dehydrogenase	PHGDH	sp|O43175|SERA_HUMAN D-3-phosphoglycerate dehydrogenase OS=Homo sapiens OX=9606 GN=PHGDH PE=1 SV=4	1	32	32	32	26	26	21	16	18	18	19	17	17	18	21	23	16	16	22	21	24	25	17	18	22	21	26	26	21	16	18	18	19	17	17	18	21	23	16	16	22	21
O43181	O43181	2	2	2	NADH dehydrogenase [ubiquinone] iron-sulfur protein 4, mitochondrial	NDUFS4	sp|O43181|NDUS4_HUMAN NADH dehydrogenase [ubiquinone] iron-sulfur protein 4, mitochondrial OS=Homo sapiens OX=9606 GN=NDUFS4 PE=1 SV=1	1	2	2	2	0	1	1	1	1	1	1	1	1	1	1	1	1	1	1	0	1	0	1	1	1	1	0	1	1	1	1	1	1	1	1	1	1	1	1	1	1	0
O43236-5;O43236-2;O43236-3;O43236;O43236-4;O43236-6	O43236-5;O43236-2;O43236-3;O43236;O43236-4	6;6;6;6;6;2	6;6;6;6;6;2	6;6;6;6;6;2	Septin-4	2004-09-01	sp|O43236-5|SEPT4_HUMAN Isoform 5 of Septin-4 OS=Homo sapiens OX=9606 GN=SEPTIN4;sp|O43236-2|SEPT4_HUMAN Isoform 2 of Septin-4 OS=Homo sapiens OX=9606 GN=SEPTIN4;sp|O43236-3|SEPT4_HUMAN Isoform 3 of Septin-4 OS=Homo sapiens OX=9606 GN=SEPTIN4;sp|O43236|SEP	6	6	6	6	2	1	5	3	1	1	2	2	2	2	3	3	3	2	0	1	1	1	4	2	2	2	2	1	5	3	1	1	2	2	2	2	3	3	3	2	0	1
O43237;O43237-2	O43237;O43237-2	26;24	26;24	25;24	Cytoplasmic dynein 1 light intermediate chain 2	DYNC1LI2	sp|O43237|DC1L2_HUMAN Cytoplasmic dynein 1 light intermediate chain 2 OS=Homo sapiens OX=9606 GN=DYNC1LI2 PE=1 SV=1;sp|O43237-2|DC1L2_HUMAN Isoform 2 of Cytoplasmic dynein 1 light intermediate chain 2 OS=Homo sapiens OX=9606 GN=DYNC1LI2	2	26	26	25	18	11	19	19	18	18	19	18	18	17	21	21	22	19	18	17	14	13	15	15	20	20	18	11	19	19	18	18	19	18	18	17	21	21	22	19	18	17
O43242;O43242-2	O43242;O43242-2	36;27	36;27	36;27	26S proteasome non-ATPase regulatory subunit 3	PSMD3	sp|O43242|PSMD3_HUMAN 26S proteasome non-ATPase regulatory subunit 3 OS=Homo sapiens OX=9606 GN=PSMD3 PE=1 SV=2;sp|O43242-2|PSMD3_HUMAN Isoform 2 of 26S proteasome non-ATPase regulatory subunit 3 OS=Homo sapiens OX=9606 GN=PSMD3	2	36	36	36	26	25	28	24	25	25	24	26	24	21	25	28	25	20	29	26	23	24	25	23	24	24	26	25	28	24	25	25	24	26	24	21	25	28	25	20	29	26
O43251-8;O43251-6;O43251-5;O43251;O43251-10;O43251-2;O43251-3;O43251-4;Q9NWB1-3;A6NFN3-2;O43251-9;Q9NWB1-4;Q9NWB1-5;Q9NWB1;O43251-7;Q9NWB1-2;A6NFN3	O43251-8;O43251-6;O43251-5;O43251;O43251-10;O43251-2;O43251-3	4;4;3;3;3;3;3;1;1;1;1;1;1;1;1;1;1	4;4;3;3;3;3;3;1;1;1;1;1;1;1;1;1;1	4;4;3;3;3;3;3;1;1;1;1;1;1;1;1;1;1	RNA binding protein fox-1 homolog 2	RBFOX2	sp|O43251-8|RFOX2_HUMAN Isoform 8 of RNA binding protein fox-1 homolog 2 OS=Homo sapiens OX=9606 GN=RBFOX2;sp|O43251-6|RFOX2_HUMAN Isoform 6 of RNA binding protein fox-1 homolog 2 OS=Homo sapiens OX=9606 GN=RBFOX2;sp|O43251-5|RFOX2_HUMAN Isoform 5 of RNA b	17	4	4	4	2	1	3	2	2	2	2	3	3	3	4	3	4	4	2	2	1	3	0	1	2	2	2	1	3	2	2	2	2	3	3	3	4	3	4	4	2	2
O43252	O43252	20	20	19	Bifunctional 3-phosphoadenosine 5-phosphosulfate synthase 1;Sulfate adenylyltransferase;Adenylyl-sulfate kinase	PAPSS1	sp|O43252|PAPS1_HUMAN Bifunctional 3-phosphoadenosine 5-phosphosulfate synthase 1 OS=Homo sapiens OX=9606 GN=PAPSS1 PE=1 SV=2	1	20	20	19	9	8	9	10	10	10	10	10	11	10	16	15	14	12	15	12	10	11	10	10	10	11	9	8	9	10	10	10	10	10	11	10	16	15	14	12	15	12
O43264;O43264-2	O43264;O43264-2	23;21	23;21	23;21	Centromere/kinetochore protein zw10 homolog	ZW10	sp|O43264|ZW10_HUMAN Centromere/kinetochore protein zw10 homolog OS=Homo sapiens OX=9606 GN=ZW10 PE=1 SV=3;sp|O43264-2|ZW10_HUMAN Isoform 2 of Centromere/kinetochore protein zw10 homolog OS=Homo sapiens OX=9606 GN=ZW10	2	23	23	23	14	14	17	17	16	16	17	17	15	12	16	18	16	13	13	14	9	12	14	16	14	13	14	14	17	17	16	16	17	17	15	12	16	18	16	13	13	14
O43290	O43290	23	23	23	U4/U6.U5 tri-snRNP-associated protein 1	SART1	sp|O43290|SNUT1_HUMAN U4/U6.U5 tri-snRNP-associated protein 1 OS=Homo sapiens OX=9606 GN=SART1 PE=1 SV=1	1	23	23	23	12	12	15	14	17	18	13	15	11	13	17	17	14	14	17	16	9	12	10	9	14	14	12	12	15	14	17	18	13	15	11	13	17	17	14	14	17	16
O43292;O43292-2	O43292;O43292-2	3;2	3;2	3;2	Glycosylphosphatidylinositol anchor attachment 1 protein	GPAA1	sp|O43292|GPAA1_HUMAN Glycosylphosphatidylinositol anchor attachment 1 protein OS=Homo sapiens OX=9606 GN=GPAA1 PE=1 SV=3;sp|O43292-2|GPAA1_HUMAN Isoform 2 of Glycosylphosphatidylinositol anchor attachment 1 protein OS=Homo sapiens OX=9606 GN=GPAA1	2	3	3	3	1	1	2	2	1	1	1	2	2	3	2	2	3	1	1	1	2	1	0	0	0	0	1	1	2	2	1	1	1	2	2	3	2	2	3	1	1	1
O43293;O43293-2	O43293;O43293-2	4;2	4;2	4;2	Death-associated protein kinase 3	DAPK3	sp|O43293|DAPK3_HUMAN Death-associated protein kinase 3 OS=Homo sapiens OX=9606 GN=DAPK3 PE=1 SV=1;sp|O43293-2|DAPK3_HUMAN Isoform 2 of Death-associated protein kinase 3 OS=Homo sapiens OX=9606 GN=DAPK3	2	4	4	4	1	2	2	1	2	2	2	2	2	2	1	2	2	2	1	1	1	1	2	2	3	3	1	2	2	1	2	2	2	2	2	2	1	2	2	2	1	1
O43299;O43299-2;O43299-3	O43299;O43299-2;O43299-3	4;4;2	4;4;2	4;4;2	AP-5 complex subunit zeta-1	AP5Z1	sp|O43299|AP5Z1_HUMAN AP-5 complex subunit zeta-1 OS=Homo sapiens OX=9606 GN=AP5Z1 PE=1 SV=2;sp|O43299-2|AP5Z1_HUMAN Isoform 2 of AP-5 complex subunit zeta-1 OS=Homo sapiens OX=9606 GN=AP5Z1;sp|O43299-3|AP5Z1_HUMAN Isoform 3 of AP-5 complex subunit zeta-1	3	4	4	4	2	1	2	0	2	2	2	2	2	2	3	2	2	2	3	3	1	1	2	2	1	2	2	1	2	0	2	2	2	2	2	2	3	2	2	2	3	3
O43301	O43301	5	5	5	Heat shock 70 kDa protein 12A	HSPA12A	sp|O43301|HS12A_HUMAN Heat shock 70 kDa protein 12A OS=Homo sapiens OX=9606 GN=HSPA12A PE=1 SV=2	1	5	5	5	1	1	3	1	0	2	1	1	2	3	2	1	1	2	1	1	0	1	0	2	3	3	1	1	3	1	0	2	1	1	2	3	2	1	1	2	1	1
O43309	O43309	1	1	1	Zinc finger and SCAN domain-containing protein 12	ZSCAN12	sp|O43309|ZSC12_HUMAN Zinc finger and SCAN domain-containing protein 12 OS=Homo sapiens OX=9606 GN=ZSCAN12 PE=1 SV=1	1	1	1	1	0	0	0	0	0	0	0	0	0	1	0	0	0	0	0	0	0	0	0	0	0	0	0	0	0	0	0	0	0	0	0	1	0	0	0	0	0	0
O43310;O43310-2	O43310;O43310-2	1;1	1;1	1;1	CBP80/20-dependent translation initiation factor	CTIF	sp|O43310|CTIF_HUMAN CBP80/20-dependent translation initiation factor OS=Homo sapiens OX=9606 GN=CTIF PE=1 SV=1;sp|O43310-2|CTIF_HUMAN Isoform 2 of CBP80/20-dependent translation initiation factor OS=Homo sapiens OX=9606 GN=CTIF	2	1	1	1	0	0	0	0	0	0	0	0	0	0	0	0	0	0	0	0	0	0	1	1	0	0	0	0	0	0	0	0	0	0	0	0	0	0	0	0	0	0
O43314-2;O43314;Q6PFW1-6;Q6PFW1-5;Q6PFW1-7;Q6PFW1-4;Q6PFW1-3;Q6PFW1-2;Q6PFW1	O43314-2;O43314	16;16;2;2;2;2;2;2;2	16;16;2;2;2;2;2;2;2	16;16;2;2;2;2;2;2;2	Inositol hexakisphosphate and diphosphoinositol-pentakisphosphate kinase 2	PPIP5K2	sp|O43314-2|VIP2_HUMAN Isoform 2 of Inositol hexakisphosphate and diphosphoinositol-pentakisphosphate kinase 2 OS=Homo sapiens OX=9606 GN=PPIP5K2;sp|O43314|VIP2_HUMAN Inositol hexakisphosphate and diphosphoinositol-pentakisphosphate kinase 2 OS=Homo sapien	9	16	16	16	7	5	9	10	9	11	10	9	7	8	12	11	7	5	6	5	3	5	7	9	9	7	7	5	9	10	9	11	10	9	7	8	12	11	7	5	6	5
O43318-2;O43318;O43318-4;O43318-3	O43318-2;O43318;O43318-4;O43318-3	4;4;2;2	4;4;2;2	4;4;2;2	Mitogen-activated protein kinase kinase kinase 7	MAP3K7	sp|O43318-2|M3K7_HUMAN Isoform 1A of Mitogen-activated protein kinase kinase kinase 7 OS=Homo sapiens OX=9606 GN=MAP3K7;sp|O43318|M3K7_HUMAN Mitogen-activated protein kinase kinase kinase 7 OS=Homo sapiens OX=9606 GN=MAP3K7 PE=1 SV=1;sp|O43318-4|M3K7_HUMAN	4	4	4	4	0	0	2	3	3	3	4	3	3	4	3	4	3	2	1	0	0	0	2	3	2	3	0	0	2	3	3	3	4	3	3	4	3	4	3	2	1	0
O43324;O43324-2	O43324;O43324-2	6;4	6;4	6;4	Eukaryotic translation elongation factor 1 epsilon-1	EEF1E1	sp|O43324|MCA3_HUMAN Eukaryotic translation elongation factor 1 epsilon-1 OS=Homo sapiens OX=9606 GN=EEF1E1 PE=1 SV=1;sp|O43324-2|MCA3_HUMAN Isoform 2 of Eukaryotic translation elongation factor 1 epsilon-1 OS=Homo sapiens OX=9606 GN=EEF1E1	2	6	6	6	6	5	5	5	4	5	3	4	4	3	6	6	5	4	6	5	4	6	5	2	6	5	6	5	5	5	4	5	3	4	4	3	6	6	5	4	6	5
O43379;O43379-4;O43379-3;O43379-2	O43379;O43379-4;O43379-3;O43379-2	3;3;2;2	3;3;2;2	3;3;2;2	WD repeat-containing protein 62	WDR62	sp|O43379|WDR62_HUMAN WD repeat-containing protein 62 OS=Homo sapiens OX=9606 GN=WDR62 PE=1 SV=4;sp|O43379-4|WDR62_HUMAN Isoform 4 of WD repeat-containing protein 62 OS=Homo sapiens OX=9606 GN=WDR62;sp|O43379-3|WDR62_HUMAN Isoform 3 of WD repeat-containing	4	3	3	3	0	1	2	3	2	2	1	1	3	3	2	1	1	2	1	1	0	1	2	2	2	3	0	1	2	3	2	2	1	1	3	3	2	1	1	2	1	1
O43390;O43390-3	O43390;O43390-3	39;33	31;27	2;2	Heterogeneous nuclear ribonucleoprotein R	HNRNPR	sp|O43390|HNRPR_HUMAN Heterogeneous nuclear ribonucleoprotein R OS=Homo sapiens OX=9606 GN=HNRNPR PE=1 SV=1;sp|O43390-3|HNRPR_HUMAN Isoform 3 of Heterogeneous nuclear ribonucleoprotein R OS=Homo sapiens OX=9606 GN=HNRNPR	2	39	31	2	30	26	27	20	23	23	23	22	20	22	26	28	24	21	30	25	25	23	26	24	30	27	22	18	20	16	18	19	19	18	16	18	19	21	20	18	22	18
O43390-2;O43390-4	O43390-2;O43390-4	39;34	2;2	2;2	Heterogeneous nuclear ribonucleoprotein R	HNRNPR	sp|O43390-2|HNRPR_HUMAN Isoform 2 of Heterogeneous nuclear ribonucleoprotein R OS=Homo sapiens OX=9606 GN=HNRNPR;sp|O43390-4|HNRPR_HUMAN Isoform 4 of Heterogeneous nuclear ribonucleoprotein R OS=Homo sapiens OX=9606 GN=HNRNPR	2	39	2	2	29	27	27	20	23	23	24	22	20	22	25	27	25	22	29	24	23	22	26	24	30	27	1	1	1	1	1	1	2	1	1	1	1	1	2	2	1	1
O43395;O43395-3	O43395	15;5	15;5	15;5	U4/U6 small nuclear ribonucleoprotein Prp3	PRPF3	sp|O43395|PRPF3_HUMAN U4/U6 small nuclear ribonucleoprotein Prp3 OS=Homo sapiens OX=9606 GN=PRPF3 PE=1 SV=2	2	15	15	15	6	10	10	12	12	12	12	12	8	10	11	12	11	10	10	8	5	10	10	9	12	12	6	10	10	12	12	12	12	12	8	10	11	12	11	10	10	8
O43396	O43396	17	17	17	Thioredoxin-like protein 1	TXNL1	sp|O43396|TXNL1_HUMAN Thioredoxin-like protein 1 OS=Homo sapiens OX=9606 GN=TXNL1 PE=1 SV=3	1	17	17	17	10	9	14	15	11	12	10	12	12	12	14	14	12	12	13	13	13	12	11	13	11	10	10	9	14	15	11	12	10	12	12	12	14	14	12	12	13	13
O43399;O43399-5;O43399-7	O43399;O43399-5;O43399-7	15;15;15	15;15;15	3;3;3	Tumor protein D54	TPD52L2	sp|O43399|TPD54_HUMAN Tumor protein D54 OS=Homo sapiens OX=9606 GN=TPD52L2 PE=1 SV=2;sp|O43399-5|TPD54_HUMAN Isoform 5 of Tumor protein D54 OS=Homo sapiens OX=9606 GN=TPD52L2;sp|O43399-7|TPD54_HUMAN Isoform 7 of Tumor protein D54 OS=Homo sapiens OX=9606 GN	3	15	15	3	12	10	10	9	9	8	9	10	9	10	11	12	10	10	13	10	11	12	8	10	12	12	12	10	10	9	9	8	9	10	9	10	11	12	10	10	13	10
O43399-2;O43399-4;O43399-3;O43399-6	O43399-2;O43399-4;O43399-3;O43399-6	13;13;13;10	1;1;1;1	1;1;1;1	Tumor protein D54	TPD52L2	sp|O43399-2|TPD54_HUMAN Isoform 2 of Tumor protein D54 OS=Homo sapiens OX=9606 GN=TPD52L2;sp|O43399-4|TPD54_HUMAN Isoform 4 of Tumor protein D54 OS=Homo sapiens OX=9606 GN=TPD52L2;sp|O43399-3|TPD54_HUMAN Isoform 3 of Tumor protein D54 OS=Homo sapiens OX=96	4	13	1	1	10	8	7	7	7	6	7	8	7	8	10	10	8	8	11	8	11	10	7	8	10	10	1	1	0	1	1	1	1	1	1	1	1	1	1	1	1	1
O43402;O43402-2	O43402	5;1	5;1	5;1	ER membrane protein complex subunit 8	EMC8	sp|O43402|EMC8_HUMAN ER membrane protein complex subunit 8 OS=Homo sapiens OX=9606 GN=EMC8 PE=1 SV=1	2	5	5	5	1	1	3	1	2	2	2	2	2	2	2	2	2	2	2	1	3	2	2	2	1	1	1	1	3	1	2	2	2	2	2	2	2	2	2	2	2	1
O43414-3;O43414-2;O43414	O43414-3;O43414-2;O43414	3;3;3	3;3;3	3;3;3	ERI1 exoribonuclease 3	ERI3	sp|O43414-3|ERI3_HUMAN Isoform 3 of ERI1 exoribonuclease 3 OS=Homo sapiens OX=9606 GN=ERI3;sp|O43414-2|ERI3_HUMAN Isoform 2 of ERI1 exoribonuclease 3 OS=Homo sapiens OX=9606 GN=ERI3;sp|O43414|ERI3_HUMAN ERI1 exoribonuclease 3 OS=Homo sapiens OX=9606 GN=ERI	3	3	3	3	1	1	2	2	2	2	2	2	1	2	2	3	1	1	2	2	1	1	1	1	0	0	1	1	2	2	2	2	2	2	1	2	2	3	1	1	2	2
O43426-5;O43426-4;O43426-2;O43426	O43426-5;O43426-4;O43426-2;O43426	3;3;3;3	3;3;3;3	3;3;3;3	Synaptojanin-1	SYNJ1	sp|O43426-5|SYNJ1_HUMAN Isoform 4 of Synaptojanin-1 OS=Homo sapiens OX=9606 GN=SYNJ1;sp|O43426-4|SYNJ1_HUMAN Isoform 3 of Synaptojanin-1 OS=Homo sapiens OX=9606 GN=SYNJ1;sp|O43426-2|SYNJ1_HUMAN Isoform 2 of Synaptojanin-1 OS=Homo sapiens OX=9606 GN=SYNJ1;s	4	3	3	3	1	0	1	1	1	2	2	2	1	0	2	2	1	0	0	0	0	0	2	2	2	2	1	0	1	1	1	2	2	2	1	0	2	2	1	0	0	0
O43432-4;O43432;O43432-3	O43432-4;O43432;O43432-3	19;19;19	12;12;12	12;12;12	Eukaryotic translation initiation factor 4 gamma 3	EIF4G3	sp|O43432-4|IF4G3_HUMAN Isoform 4 of Eukaryotic translation initiation factor 4 gamma 3 OS=Homo sapiens OX=9606 GN=EIF4G3;sp|O43432|IF4G3_HUMAN Eukaryotic translation initiation factor 4 gamma 3 OS=Homo sapiens OX=9606 GN=EIF4G3 PE=1 SV=2;sp|O43432-3|IF4G3	3	19	12	12	7	8	10	11	11	9	8	9	11	9	13	12	10	8	10	8	9	10	10	10	12	10	3	3	4	5	6	4	3	4	6	4	6	5	4	4	3	3
O43447;O43447-2	O43447;O43447-2	11;8	11;8	11;8	Peptidyl-prolyl cis-trans isomerase H	PPIH	sp|O43447|PPIH_HUMAN Peptidyl-prolyl cis-trans isomerase H OS=Homo sapiens OX=9606 GN=PPIH PE=1 SV=1;sp|O43447-2|PPIH_HUMAN Isoform 2 of Peptidyl-prolyl cis-trans isomerase H OS=Homo sapiens OX=9606 GN=PPIH	2	11	11	11	8	4	6	6	7	6	6	6	5	5	8	7	8	6	8	7	7	6	5	5	6	4	8	4	6	6	7	6	6	6	5	5	8	7	8	6	8	7
O43464-4;O43464-3;O43464;O43464-2	O43464-4;O43464-3;O43464;O43464-2	4;4;4;3	4;4;4;3	4;4;4;3	Serine protease HTRA2, mitochondrial	HTRA2	sp|O43464-4|HTRA2_HUMAN Isoform 4 of Serine protease HTRA2, mitochondrial OS=Homo sapiens OX=9606 GN=HTRA2;sp|O43464-3|HTRA2_HUMAN Isoform 3 of Serine protease HTRA2, mitochondrial OS=Homo sapiens OX=9606 GN=HTRA2;sp|O43464|HTRA2_HUMAN Serine protease HTRA	4	4	4	4	3	3	3	2	4	3	4	4	2	2	3	3	3	2	3	3	0	2	2	2	4	4	3	3	3	2	4	3	4	4	2	2	3	3	3	2	3	3
O43488;Q8NHP1;Q8NHP1-3;O95154	O43488	13;3;1;1	13;3;1;1	13;3;1;1	Aflatoxin B1 aldehyde reductase member 2	AKR7A2	sp|O43488|ARK72_HUMAN Aflatoxin B1 aldehyde reductase member 2 OS=Homo sapiens OX=9606 GN=AKR7A2 PE=1 SV=3	4	13	13	13	10	10	9	11	9	8	11	8	10	7	11	12	8	8	11	11	10	8	8	10	9	9	10	10	9	11	9	8	11	8	10	7	11	12	8	8	11	11
O43491;O43491-3;O43491-2	O43491;O43491-3;O43491-2	34;27;24	32;25;22	5;0;0	Band 4.1-like protein 2	EPB41L2	sp|O43491|E41L2_HUMAN Band 4.1-like protein 2 OS=Homo sapiens OX=9606 GN=EPB41L2 PE=1 SV=1;sp|O43491-3|E41L2_HUMAN Isoform 3 of Band 4.1-like protein 2 OS=Homo sapiens OX=9606 GN=EPB41L2;sp|O43491-2|E41L2_HUMAN Isoform 2 of Band 4.1-like protein 2 OS=Homo	3	34	32	5	18	15	20	21	21	19	23	22	23	21	24	26	20	18	26	24	19	20	20	25	27	24	18	15	18	19	19	17	21	20	21	20	22	24	18	16	25	22
O43491-4	O43491-4	30	1	1	Band 4.1-like protein 2	EPB41L2	sp|O43491-4|E41L2_HUMAN Isoform 4 of Band 4.1-like protein 2 OS=Homo sapiens OX=9606 GN=EPB41L2	1	30	1	1	17	14	17	18	18	18	18	19	19	19	22	24	18	16	23	22	17	18	16	21	24	21	0	0	0	1	0	1	0	0	0	1	1	1	0	0	0	1
O43493-4;O43493;O43493-5;O43493-3;O43493-7	O43493-4;O43493;O43493-5;O43493-3;O43493-7	2;2;2;2;2	2;2;2;2;2	2;2;2;2;2	Trans-Golgi network integral membrane protein 2	TGOLN2	sp|O43493-4|TGON2_HUMAN Isoform 4 of Trans-Golgi network integral membrane protein 2 OS=Homo sapiens OX=9606 GN=TGOLN2;sp|O43493|TGON2_HUMAN Trans-Golgi network integral membrane protein 2 OS=Homo sapiens OX=9606 GN=TGOLN2 PE=1 SV=4;sp|O43493-5|TGON2_HUMAN	5	2	2	2	0	0	2	2	2	2	2	1	0	1	2	2	2	2	1	1	0	0	0	0	1	0	0	0	2	2	2	2	2	1	0	1	2	2	2	2	1	1
O43504	O43504	4	4	4	Ragulator complex protein LAMTOR5	LAMTOR5	sp|O43504|LTOR5_HUMAN Ragulator complex protein LAMTOR5 OS=Homo sapiens OX=9606 GN=LAMTOR5 PE=1 SV=1	1	4	4	4	2	2	3	4	2	2	4	3	3	3	3	3	3	4	2	3	2	2	2	3	3	2	2	2	3	4	2	2	4	3	3	3	3	3	3	4	2	3
O43513	O43513	1	1	1	Mediator of RNA polymerase II transcription subunit 7	MED7	sp|O43513|MED7_HUMAN Mediator of RNA polymerase II transcription subunit 7 OS=Homo sapiens OX=9606 GN=MED7 PE=1 SV=1	1	1	1	1	0	0	1	1	1	1	1	1	1	1	1	1	1	1	0	0	0	0	1	1	0	0	0	0	1	1	1	1	1	1	1	1	1	1	1	1	0	0
O43516-2;O43516;O43516-3;O43516-4	O43516-2;O43516;O43516-3;O43516-4	2;2;2;1	2;2;2;1	2;2;2;1	WAS/WASL-interacting protein family member 1	WIPF1	sp|O43516-2|WIPF1_HUMAN Isoform 2 of WAS/WASL-interacting protein family member 1 OS=Homo sapiens OX=9606 GN=WIPF1;sp|O43516|WIPF1_HUMAN WAS/WASL-interacting protein family member 1 OS=Homo sapiens OX=9606 GN=WIPF1 PE=1 SV=3;sp|O43516-3|WIPF1_HUMAN Isoform	4	2	2	2	0	0	2	1	0	0	0	0	0	0	2	2	1	1	1	1	0	1	0	0	0	0	0	0	2	1	0	0	0	0	0	0	2	2	1	1	1	1
O43524-2;O43524	O43524-2;O43524	1;1	1;1	1;1	Forkhead box protein O3	FOXO3	sp|O43524-2|FOXO3_HUMAN Isoform 2 of Forkhead box protein O3 OS=Homo sapiens OX=9606 GN=FOXO3;sp|O43524|FOXO3_HUMAN Forkhead box protein O3 OS=Homo sapiens OX=9606 GN=FOXO3 PE=1 SV=1	2	1	1	1	0	0	0	0	1	0	1	0	0	0	1	0	0	0	0	0	0	0	0	0	0	0	0	0	0	0	1	0	1	0	0	0	1	0	0	0	0	0
O43567	O43567	1	1	1	E3 ubiquitin-protein ligase RNF13	RNF13	sp|O43567|RNF13_HUMAN E3 ubiquitin-protein ligase RNF13 OS=Homo sapiens OX=9606 GN=RNF13 PE=1 SV=1	1	1	1	1	0	0	0	0	0	0	0	0	0	0	1	0	0	0	1	1	0	0	0	0	0	0	0	0	0	0	0	0	0	0	0	0	1	0	0	0	1	1
O43583	O43583	6	6	6	Density-regulated protein	DENR	sp|O43583|DENR_HUMAN Density-regulated protein OS=Homo sapiens OX=9606 GN=DENR PE=1 SV=2	1	6	6	6	4	3	4	5	4	5	4	5	4	5	5	4	4	4	4	4	5	5	4	5	5	5	4	3	4	5	4	5	4	5	4	5	5	4	4	4	4	4
O43592	O43592	12	12	11	Exportin-T	XPOT	sp|O43592|XPOT_HUMAN Exportin-T OS=Homo sapiens OX=9606 GN=XPOT PE=1 SV=2	1	12	12	11	5	3	3	4	5	4	5	4	6	6	5	4	6	5	4	5	6	4	5	7	3	4	5	3	3	4	5	4	5	4	6	6	5	4	6	5	4	5
O43597	O43597	1	1	1	Protein sprouty homolog 2	SPRY2	sp|O43597|SPY2_HUMAN Protein sprouty homolog 2 OS=Homo sapiens OX=9606 GN=SPRY2 PE=1 SV=1	1	1	1	1	1	0	1	1	1	1	1	1	1	1	1	1	1	1	0	0	1	0	1	1	1	0	1	0	1	1	1	1	1	1	1	1	1	1	1	1	0	0
O43598-2;O43598	O43598-2;O43598	4;4	4;4	4;4	2-deoxynucleoside 5-phosphate N-hydrolase 1	DNPH1	sp|O43598-2|DNPH1_HUMAN Isoform 2 of 2-deoxynucleoside 5-phosphate N-hydrolase 1 OS=Homo sapiens OX=9606 GN=DNPH1;sp|O43598|DNPH1_HUMAN 2-deoxynucleoside 5-phosphate N-hydrolase 1 OS=Homo sapiens OX=9606 GN=DNPH1 PE=1 SV=1	2	4	4	4	4	3	3	2	3	3	2	3	3	2	3	3	2	2	3	3	2	2	3	2	1	1	4	3	3	2	3	3	2	3	3	2	3	3	2	2	3	3
O43615	O43615	25	25	25	Mitochondrial import inner membrane translocase subunit TIM44	TIMM44	sp|O43615|TIM44_HUMAN Mitochondrial import inner membrane translocase subunit TIM44 OS=Homo sapiens OX=9606 GN=TIMM44 PE=1 SV=2	1	25	25	25	16	16	15	14	15	16	14	14	15	15	17	18	13	13	14	15	12	16	15	14	17	18	16	16	15	14	15	16	14	14	15	15	17	18	13	13	14	15
O43617;O43617-2	O43617;O43617-2	6;4	6;4	6;4	Trafficking protein particle complex subunit 3	TRAPPC3	sp|O43617|TPPC3_HUMAN Trafficking protein particle complex subunit 3 OS=Homo sapiens OX=9606 GN=TRAPPC3 PE=1 SV=1;sp|O43617-2|TPPC3_HUMAN Isoform 2 of Trafficking protein particle complex subunit 3 OS=Homo sapiens OX=9606 GN=TRAPPC3	2	6	6	6	3	4	6	4	4	4	4	3	4	3	5	3	4	4	5	4	3	5	4	4	3	3	3	4	6	4	4	4	4	3	4	3	5	3	4	4	5	4
O43633	O43633	4	4	4	Charged multivesicular body protein 2a	CHMP2A	sp|O43633|CHM2A_HUMAN Charged multivesicular body protein 2a OS=Homo sapiens OX=9606 GN=CHMP2A PE=1 SV=1	1	4	4	4	3	3	3	1	3	3	2	2	3	2	1	1	3	3	2	2	1	1	3	3	3	3	3	3	3	1	3	3	2	2	3	2	1	1	3	3	2	2
O43639	O43639	10	9	9	Cytoplasmic protein NCK2	NCK2	sp|O43639|NCK2_HUMAN Cytoplasmic protein NCK2 OS=Homo sapiens OX=9606 GN=NCK2 PE=1 SV=2	1	10	9	9	3	4	2	3	2	1	3	2	3	3	6	6	5	4	6	6	4	6	4	5	5	4	2	3	2	3	2	1	3	2	3	3	5	5	4	3	5	5
O43660;O43660-2	O43660;O43660-2	18;17	18;17	18;17	Pleiotropic regulator 1	PLRG1	sp|O43660|PLRG1_HUMAN Pleiotropic regulator 1 OS=Homo sapiens OX=9606 GN=PLRG1 PE=1 SV=1;sp|O43660-2|PLRG1_HUMAN Isoform 2 of Pleiotropic regulator 1 OS=Homo sapiens OX=9606 GN=PLRG1	2	18	18	18	9	5	10	11	10	13	14	12	14	15	14	14	14	13	15	9	5	9	12	13	11	13	9	5	10	11	10	13	14	12	14	15	14	14	14	13	15	9
O43663-4;O43663;O43663-2;O43663-3	O43663-4;O43663;O43663-2;O43663-3	17;17;15;14	17;17;15;14	17;17;15;14	Protein regulator of cytokinesis 1	PRC1	sp|O43663-4|PRC1_HUMAN Isoform 4 of Protein regulator of cytokinesis 1 OS=Homo sapiens OX=9606 GN=PRC1;sp|O43663|PRC1_HUMAN Protein regulator of cytokinesis 1 OS=Homo sapiens OX=9606 GN=PRC1 PE=1 SV=2;sp|O43663-2|PRC1_HUMAN Isoform 2 of Protein regulator o	4	17	17	17	8	5	11	11	11	11	10	11	13	9	12	15	12	13	8	4	7	11	11	11	11	12	8	5	11	11	11	11	10	11	13	9	12	15	12	13	8	4
O43665;O43665-2;O43665-1	O43665;O43665-2;O43665-1	12;11;11	12;11;11	12;11;11	Regulator of G-protein signaling 10	RGS10	sp|O43665|RGS10_HUMAN Regulator of G-protein signaling 10 OS=Homo sapiens OX=9606 GN=RGS10 PE=1 SV=3;sp|O43665-2|RGS10_HUMAN Isoform 2 of Regulator of G-protein signaling 10 OS=Homo sapiens OX=9606 GN=RGS10;sp|O43665-1|RGS10_HUMAN Isoform 1 of Regulator of	3	12	12	12	7	6	11	12	12	12	12	12	12	11	11	11	11	11	11	9	7	9	10	12	11	12	7	6	11	12	12	12	12	12	12	11	11	11	11	11	11	9
O43670-2;O43670;O43670-4;O43670-3	O43670-2;O43670;O43670-4;O43670-3	6;6;6;4	6;6;6;4	6;6;6;4	BUB3-interacting and GLEBS motif-containing protein ZNF207	ZNF207	sp|O43670-2|ZN207_HUMAN Isoform 2 of BUB3-interacting and GLEBS motif-containing protein ZNF207 OS=Homo sapiens OX=9606 GN=ZNF207;sp|O43670|ZN207_HUMAN BUB3-interacting and GLEBS motif-containing protein ZNF207 OS=Homo sapiens OX=9606 GN=ZNF207 PE=1 SV=1;s	4	6	6	6	4	4	6	5	4	4	5	5	4	5	6	6	5	5	5	4	4	5	4	4	3	3	4	4	6	5	4	4	5	5	4	5	6	6	5	5	5	4
O43674-2;O43674	O43674-2;O43674	3;3	3;3	3;3	NADH dehydrogenase [ubiquinone] 1 beta subcomplex subunit 5, mitochondrial	NDUFB5	sp|O43674-2|NDUB5_HUMAN Isoform 2 of NADH dehydrogenase [ubiquinone] 1 beta subcomplex subunit 5, mitochondrial OS=Homo sapiens OX=9606 GN=NDUFB5;sp|O43674|NDUB5_HUMAN NADH dehydrogenase [ubiquinone] 1 beta subcomplex subunit 5, mitochondrial OS=Homo sapie	2	3	3	3	2	2	3	3	3	3	3	3	3	3	2	3	3	3	2	2	2	3	2	3	3	3	2	2	3	3	3	3	3	3	3	3	2	3	3	3	2	2
O43676	O43676	4	4	4	NADH dehydrogenase [ubiquinone] 1 beta subcomplex subunit 3	NDUFB3	sp|O43676|NDUB3_HUMAN NADH dehydrogenase [ubiquinone] 1 beta subcomplex subunit 3 OS=Homo sapiens OX=9606 GN=NDUFB3 PE=1 SV=3	1	4	4	4	2	1	1	1	1	1	1	1	1	1	1	2	1	1	1	1	0	3	2	2	3	3	2	1	1	1	1	1	1	1	1	1	1	2	1	1	1	1
O43678;O43678-2	O43678;O43678-2	4;2	4;2	4;2	NADH dehydrogenase [ubiquinone] 1 alpha subcomplex subunit 2	NDUFA2	sp|O43678|NDUA2_HUMAN NADH dehydrogenase [ubiquinone] 1 alpha subcomplex subunit 2 OS=Homo sapiens OX=9606 GN=NDUFA2 PE=1 SV=3;sp|O43678-2|NDUA2_HUMAN Isoform 2 of NADH dehydrogenase [ubiquinone] 1 alpha subcomplex subunit 2 OS=Homo sapiens OX=9606 GN=NDUF	2	4	4	4	4	4	2	2	2	2	2	2	2	2	2	2	1	1	3	3	3	2	2	2	3	3	4	4	2	2	2	2	2	2	2	2	2	2	1	1	3	3
O43681	O43681	17	17	17	ATPase ASNA1	ASNA1	sp|O43681|GET3_HUMAN ATPase GET3 OS=Homo sapiens OX=9606 GN=GET3 PE=1 SV=2	1	17	17	17	11	10	11	12	11	12	11	11	10	10	11	9	10	9	9	8	10	9	9	11	11	10	11	10	11	12	11	12	11	11	10	10	11	9	10	9	9	8
O43683-2;O43683-3;O43683	O43683-2;O43683-3;O43683	5;5;5	5;5;5	5;5;5	Mitotic checkpoint serine/threonine-protein kinase BUB1	BUB1	sp|O43683-2|BUB1_HUMAN Isoform 2 of Mitotic checkpoint serine/threonine-protein kinase BUB1 OS=Homo sapiens OX=9606 GN=BUB1;sp|O43683-3|BUB1_HUMAN Isoform 3 of Mitotic checkpoint serine/threonine-protein kinase BUB1 OS=Homo sapiens OX=9606 GN=BUB1;sp|O4368	3	5	5	5	0	0	2	1	2	1	1	1	1	1	0	1	2	2	0	0	1	1	5	5	2	1	0	0	2	1	2	1	1	1	1	1	0	1	2	2	0	0
O43684-2;O43684	O43684-2;O43684	20;20	20;20	20;20	Mitotic checkpoint protein BUB3	BUB3	sp|O43684-2|BUB3_HUMAN Isoform 2 of Mitotic checkpoint protein BUB3 OS=Homo sapiens OX=9606 GN=BUB3;sp|O43684|BUB3_HUMAN Mitotic checkpoint protein BUB3 OS=Homo sapiens OX=9606 GN=BUB3 PE=1 SV=1	2	20	20	20	13	15	16	10	12	11	12	12	11	11	15	15	12	10	15	14	14	12	11	10	16	15	13	15	16	10	12	11	12	12	11	11	15	15	12	10	15	14
O43707;O43707-2;O43707-3;Q08043	O43707;O43707-2	101;70;47;14	101;70;47;14	68;52;38;0	Alpha-actinin-4	ACTN4	sp|O43707|ACTN4_HUMAN Alpha-actinin-4 OS=Homo sapiens OX=9606 GN=ACTN4 PE=1 SV=2;sp|O43707-2|ACTN4_HUMAN Isoform ACTN4ISO of Alpha-actinin-4 OS=Homo sapiens OX=9606 GN=ACTN4	4	101	101	68	75	75	81	74	77	76	74	75	70	72	75	74	77	76	76	72	68	76	79	81	91	87	75	75	81	74	77	76	74	75	70	72	75	74	77	76	76	72
O43708-2;O43708;O43708-3	O43708-2;O43708;O43708-3	4;4;3	4;4;3	4;4;3	Maleylacetoacetate isomerase	GSTZ1	sp|O43708-2|MAAI_HUMAN Isoform 2 of Maleylacetoacetate isomerase OS=Homo sapiens OX=9606 GN=GSTZ1;sp|O43708|MAAI_HUMAN Maleylacetoacetate isomerase OS=Homo sapiens OX=9606 GN=GSTZ1 PE=1 SV=3;sp|O43708-3|MAAI_HUMAN Isoform 3 of Maleylacetoacetate isomerase	3	4	4	4	4	3	4	4	2	4	4	4	4	3	4	3	3	2	2	2	0	2	4	4	2	3	4	3	4	4	2	4	4	4	4	3	4	3	3	2	2	2
O43709;O43709-3;O43709-2	O43709;O43709-3	7;6;1	7;6;1	7;6;1	Probable 18S rRNA (guanine-N(7))-methyltransferase	WBSCR22	sp|O43709|BUD23_HUMAN Probable 18S rRNA (guanine-N(7))-methyltransferase OS=Homo sapiens OX=9606 GN=BUD23 PE=1 SV=2;sp|O43709-3|BUD23_HUMAN Isoform 3 of Probable 18S rRNA (guanine-N(7))-methyltransferase OS=Homo sapiens OX=9606 GN=BUD23	3	7	7	7	3	3	5	5	5	5	5	6	6	5	5	4	4	2	3	4	3	4	6	6	3	3	3	3	5	5	5	5	5	6	6	5	5	4	4	2	3	4
O43715	O43715	2	2	2	TP53-regulated inhibitor of apoptosis 1	TRIAP1	sp|O43715|TRIA1_HUMAN TP53-regulated inhibitor of apoptosis 1 OS=Homo sapiens OX=9606 GN=TRIAP1 PE=1 SV=1	1	2	2	2	1	0	1	2	1	1	1	0	1	1	1	1	1	1	1	2	0	1	1	1	0	0	1	0	1	2	1	1	1	0	1	1	1	1	1	1	1	2
O43716	O43716	4	4	4	Glutamyl-tRNA(Gln) amidotransferase subunit C, mitochondrial	GATC	sp|O43716|GATC_HUMAN Glutamyl-tRNA(Gln) amidotransferase subunit C, mitochondrial OS=Homo sapiens OX=9606 GN=GATC PE=1 SV=1	1	4	4	4	2	2	3	2	2	3	3	4	2	2	3	3	3	3	2	1	2	0	1	2	0	0	2	2	3	2	2	3	3	4	2	2	3	3	3	3	2	1
O43719	O43719	12	12	12	HIV Tat-specific factor 1	HTATSF1	sp|O43719|HTSF1_HUMAN HIV Tat-specific factor 1 OS=Homo sapiens OX=9606 GN=HTATSF1 PE=1 SV=1	1	12	12	12	2	2	6	6	5	6	4	6	4	4	7	5	7	7	6	5	5	6	6	8	10	8	2	2	6	6	5	6	4	6	4	4	7	5	7	7	6	5
O43741;O43741-2	O43741;O43741-2	2;1	2;1	2;1	5-AMP-activated protein kinase subunit beta-2	PRKAB2	sp|O43741|AAKB2_HUMAN 5-AMP-activated protein kinase subunit beta-2 OS=Homo sapiens OX=9606 GN=PRKAB2 PE=1 SV=1;sp|O43741-2|AAKB2_HUMAN Isoform 2 of 5-AMP-activated protein kinase subunit beta-2 OS=Homo sapiens OX=9606 GN=PRKAB2	2	2	2	2	0	0	0	0	0	0	0	1	1	1	1	2	1	2	1	1	0	0	1	0	0	0	0	0	0	0	0	0	0	1	1	1	1	2	1	2	1	1
O43747;O43747-2	O43747;O43747-2	14;14	14;14	14;14	AP-1 complex subunit gamma-1	AP1G1	sp|O43747|AP1G1_HUMAN AP-1 complex subunit gamma-1 OS=Homo sapiens OX=9606 GN=AP1G1 PE=1 SV=5;sp|O43747-2|AP1G1_HUMAN Isoform 2 of AP-1 complex subunit gamma-1 OS=Homo sapiens OX=9606 GN=AP1G1	2	14	14	14	8	8	10	9	10	9	7	9	8	6	11	11	9	11	10	9	9	11	6	7	8	8	8	8	10	9	10	9	7	9	8	6	11	11	9	11	10	9
O43759-2;O43759	O43759-2;O43759	1;1	1;1	1;1	Synaptogyrin-1	SYNGR1	sp|O43759-2|SNG1_HUMAN Isoform 1B of Synaptogyrin-1 OS=Homo sapiens OX=9606 GN=SYNGR1;sp|O43759|SNG1_HUMAN Synaptogyrin-1 OS=Homo sapiens OX=9606 GN=SYNGR1 PE=1 SV=2	2	1	1	1	1	1	1	1	1	1	1	1	1	0	1	1	0	0	1	1	1	1	0	0	1	1	1	1	1	1	1	1	1	1	1	0	1	1	0	0	1	1
O43765	O43765	13	13	13	Small glutamine-rich tetratricopeptide repeat-containing protein alpha	SGTA	sp|O43765|SGTA_HUMAN Small glutamine-rich tetratricopeptide repeat-containing protein alpha OS=Homo sapiens OX=9606 GN=SGTA PE=1 SV=1	1	13	13	13	9	9	11	6	8	8	8	7	8	8	9	9	9	8	10	10	10	10	7	7	10	9	9	9	11	6	8	8	8	7	8	8	9	9	9	8	10	10
O43768-2;O43768;O43768-9;O43768-3;O43768-4;O43768-6;O43768-5;O43768-7;O43768-8	O43768-2;O43768;O43768-9;O43768-3;O43768-4;O43768-6;O43768-5;O43768-7;O43768-8	6;6;6;6;6;5;5;5;3	6;6;6;6;6;5;5;5;3	5;5;5;5;5;4;4;4;3	Alpha-endosulfine	ENSA	sp|O43768-2|ENSA_HUMAN Isoform 2 of Alpha-endosulfine OS=Homo sapiens OX=9606 GN=ENSA;sp|O43768|ENSA_HUMAN Alpha-endosulfine OS=Homo sapiens OX=9606 GN=ENSA PE=1 SV=1;sp|O43768-9|ENSA_HUMAN Isoform 9 of Alpha-endosulfine OS=Homo sapiens OX=9606 GN=ENSA;sp|	9	6	6	5	2	2	5	5	5	5	5	3	4	4	6	6	5	3	5	2	2	4	4	4	3	4	2	2	5	5	5	5	5	3	4	4	6	6	5	3	5	2
O43776;O43776-2	O43776	35;12	35;12	35;12	Asparagine--tRNA ligase, cytoplasmic	NARS	sp|O43776|SYNC_HUMAN Asparagine--tRNA ligase, cytoplasmic OS=Homo sapiens OX=9606 GN=NARS1 PE=1 SV=1	2	35	35	35	23	22	21	24	28	27	26	27	25	25	28	30	26	24	24	23	21	23	24	24	24	25	23	22	21	24	28	27	26	27	25	25	28	30	26	24	24	23
O43795;O43795-2	O43795;O43795-2	43;41	43;41	39;37	Unconventional myosin-Ib	MYO1B	sp|O43795|MYO1B_HUMAN Unconventional myosin-Ib OS=Homo sapiens OX=9606 GN=MYO1B PE=1 SV=3;sp|O43795-2|MYO1B_HUMAN Isoform 2 of Unconventional myosin-Ib OS=Homo sapiens OX=9606 GN=MYO1B	2	43	43	39	28	25	28	26	27	23	23	24	23	21	30	31	26	24	31	27	21	23	26	23	25	25	28	25	28	26	27	23	23	24	23	21	30	31	26	24	31	27
O43805	O43805	2	2	2	Sjoegren syndrome nuclear autoantigen 1	SSNA1	sp|O43805|SSNA1_HUMAN Sjoegren syndrome nuclear autoantigen 1 OS=Homo sapiens OX=9606 GN=SSNA1 PE=1 SV=2	1	2	2	2	1	0	1	1	1	1	1	1	2	1	1	1	1	1	0	1	2	2	1	1	2	2	1	0	1	1	1	1	1	1	2	1	1	1	1	1	0	1
O43809	O43809	15	15	15	Cleavage and polyadenylation specificity factor subunit 5	NUDT21	sp|O43809|CPSF5_HUMAN Cleavage and polyadenylation specificity factor subunit 5 OS=Homo sapiens OX=9606 GN=NUDT21 PE=1 SV=1	1	15	15	15	11	12	14	13	13	13	11	11	11	12	12	13	13	13	13	11	9	12	13	12	11	10	11	12	14	13	13	13	11	11	11	12	12	13	13	13	13	11
O43813	O43813	5	5	5	LanC-like protein 1	LANCL1	sp|O43813|LANC1_HUMAN Glutathione S-transferase LANCL1 OS=Homo sapiens OX=9606 GN=LANCL1 PE=1 SV=1	1	5	5	5	1	0	2	3	4	3	3	3	3	3	3	4	3	4	3	2	2	4	1	3	2	3	1	0	2	3	4	3	3	3	3	3	3	4	3	4	3	2
O43815;O43815-2	O43815;O43815-2	16;14	16;14	15;13	Striatin	STRN	sp|O43815|STRN_HUMAN Striatin OS=Homo sapiens OX=9606 GN=STRN PE=1 SV=4;sp|O43815-2|STRN_HUMAN Isoform 2 of Striatin OS=Homo sapiens OX=9606 GN=STRN	2	16	16	15	8	5	11	9	10	12	9	10	13	11	9	11	10	10	10	7	6	7	10	9	4	5	8	5	11	9	10	12	9	10	13	11	9	11	10	10	10	7
O43818	O43818	11	11	11	U3 small nucleolar RNA-interacting protein 2	RRP9	sp|O43818|U3IP2_HUMAN U3 small nucleolar RNA-interacting protein 2 OS=Homo sapiens OX=9606 GN=RRP9 PE=1 SV=1	1	11	11	11	5	3	6	6	6	6	7	6	6	7	7	8	6	4	8	7	5	7	5	5	6	6	5	3	6	6	6	6	7	6	6	7	7	8	6	4	8	7
O43819	O43819	5	5	5	Protein SCO2 homolog, mitochondrial	SCO2	sp|O43819|SCO2_HUMAN Protein SCO2 homolog, mitochondrial OS=Homo sapiens OX=9606 GN=SCO2 PE=1 SV=3	1	5	5	5	3	3	3	2	3	4	2	3	3	3	3	3	4	4	3	4	4	3	3	3	3	3	3	3	3	2	3	4	2	3	3	3	3	3	4	4	3	4
O43823	O43823	10	10	10	A-kinase anchor protein 8	AKAP8	sp|O43823|AKAP8_HUMAN A-kinase anchor protein 8 OS=Homo sapiens OX=9606 GN=AKAP8 PE=1 SV=1	1	10	10	10	5	5	7	6	8	8	7	7	6	5	6	6	6	7	7	5	3	7	6	6	8	8	5	5	7	6	8	8	7	7	6	5	6	6	6	7	7	5
O43837;O43837-2;O43837-3	O43837;O43837-2	19;16;9	19;16;9	19;16;9	Isocitrate dehydrogenase [NAD] subunit beta, mitochondrial	IDH3B	sp|O43837|IDH3B_HUMAN Isocitrate dehydrogenase [NAD] subunit beta, mitochondrial OS=Homo sapiens OX=9606 GN=IDH3B PE=1 SV=2;sp|O43837-2|IDH3B_HUMAN Isoform A of Isocitrate dehydrogenase [NAD] subunit beta, mitochondrial OS=Homo sapiens OX=9606 GN=IDH3B	3	19	19	19	14	14	14	15	13	15	13	14	13	14	16	14	15	14	15	10	15	13	13	14	14	15	14	14	14	15	13	15	13	14	13	14	16	14	15	14	15	10
O43847;O43847-2	O43847;O43847-2	19;19	19;19	19;19	Nardilysin	NRD1	sp|O43847|NRDC_HUMAN Nardilysin OS=Homo sapiens OX=9606 GN=NRDC PE=1 SV=3;sp|O43847-2|NRDC_HUMAN Isoform 2 of Nardilysin OS=Homo sapiens OX=9606 GN=NRDC	2	19	19	19	12	9	13	12	13	11	11	12	12	10	14	13	11	11	15	9	10	16	10	10	11	10	12	9	13	12	13	11	11	12	12	10	14	13	11	11	15	9
O43852;O43852-3;O43852-5;O43852-6;O43852-15;O43852-10;O43852-9;O43852-11;O43852-13;O43852-14;O43852-12	O43852;O43852-3;O43852-5;O43852-6;O43852-15;O43852-10	25;25;17;16;14;13;12;11;10;10;6	25;25;17;16;14;13;12;11;10;10;6	4;4;4;4;0;4;0;4;4;4;0	Calumenin	CALU	sp|O43852|CALU_HUMAN Calumenin OS=Homo sapiens OX=9606 GN=CALU PE=1 SV=2;sp|O43852-3|CALU_HUMAN Isoform 3 of Calumenin OS=Homo sapiens OX=9606 GN=CALU;sp|O43852-5|CALU_HUMAN Isoform 5 of Calumenin OS=Homo sapiens OX=9606 GN=CALU;sp|O43852-6|CALU_HUMAN Isof	11	25	25	4	16	16	22	20	21	22	21	20	20	19	21	22	19	17	22	20	19	19	17	20	20	20	16	16	22	20	21	22	21	20	20	19	21	22	19	17	22	20
O43852-2;O43852-4;O43852-8;O43852-7	O43852-2;O43852-4;O43852-8	23;23;12;8	2;2;2;2	2;2;2;2	Calumenin	CALU	sp|O43852-2|CALU_HUMAN Isoform 2 of Calumenin OS=Homo sapiens OX=9606 GN=CALU;sp|O43852-4|CALU_HUMAN Isoform 4 of Calumenin OS=Homo sapiens OX=9606 GN=CALU;sp|O43852-8|CALU_HUMAN Isoform 8 of Calumenin OS=Homo sapiens OX=9606 GN=CALU	4	23	2	2	15	14	19	19	20	21	21	19	19	18	19	20	18	16	19	17	17	17	16	18	18	18	1	1	1	2	2	2	2	2	2	1	2	2	2	2	1	1
O43865;O43865-2	O43865;O43865-2	23;18	23;18	15;10	Putative adenosylhomocysteinase 2	AHCYL1	sp|O43865|SAHH2_HUMAN S-adenosylhomocysteine hydrolase-like protein 1 OS=Homo sapiens OX=9606 GN=AHCYL1 PE=1 SV=2;sp|O43865-2|SAHH2_HUMAN Isoform 2 of S-adenosylhomocysteine hydrolase-like protein 1 OS=Homo sapiens OX=9606 GN=AHCYL1	2	23	23	15	13	10	12	14	14	14	13	13	13	13	15	16	14	14	16	14	13	13	11	15	11	10	13	10	12	14	14	14	13	13	13	13	15	16	14	14	16	14
O43896	O43896	5	4	4	Kinesin-like protein KIF1C	KIF1C	sp|O43896|KIF1C_HUMAN Kinesin-like protein KIF1C OS=Homo sapiens OX=9606 GN=KIF1C PE=1 SV=3	1	5	4	4	1	1	2	4	3	2	2	3	1	1	3	3	3	1	1	1	2	1	2	1	3	3	0	0	2	3	3	2	2	3	1	1	2	2	2	1	0	0
O43913-2;O43913	O43913-2;O43913	4;4	4;4	4;4	Origin recognition complex subunit 5	ORC5	sp|O43913-2|ORC5_HUMAN Isoform 2 of Origin recognition complex subunit 5 OS=Homo sapiens OX=9606 GN=ORC5;sp|O43913|ORC5_HUMAN Origin recognition complex subunit 5 OS=Homo sapiens OX=9606 GN=ORC5 PE=1 SV=1	2	4	4	4	0	1	2	1	2	2	1	1	2	2	1	1	2	1	1	1	1	1	2	2	1	0	0	1	2	1	2	2	1	1	2	2	1	1	2	1	1	1
O43920	O43920	9	9	9	NADH dehydrogenase [ubiquinone] iron-sulfur protein 5	NDUFS5	sp|O43920|NDUS5_HUMAN NADH dehydrogenase [ubiquinone] iron-sulfur protein 5 OS=Homo sapiens OX=9606 GN=NDUFS5 PE=1 SV=3	1	9	9	9	5	4	6	7	7	6	6	6	5	7	6	7	5	5	6	6	5	7	5	5	3	1	5	4	6	7	7	6	6	6	5	7	6	7	5	5	6	6
O43924	O43924	3	3	3	Retinal rod rhodopsin-sensitive cGMP 3,5-cyclic phosphodiesterase subunit delta	PDE6D	sp|O43924|PDE6D_HUMAN Retinal rod rhodopsin-sensitive cGMP 3,5-cyclic phosphodiesterase subunit delta OS=Homo sapiens OX=9606 GN=PDE6D PE=1 SV=1	1	3	3	3	2	1	1	2	1	1	2	1	1	1	2	2	1	1	0	1	1	2	1	1	0	0	2	1	1	2	1	1	2	1	1	1	2	2	1	1	0	1
O43929;O43929-2;O43929-3;CON__Q2YDI2	O43929;O43929-2;O43929-3;CON__Q2YDI2	6;5;5;3	6;5;5;3	6;5;5;3	Origin recognition complex subunit 4	ORC4	sp|O43929|ORC4_HUMAN Origin recognition complex subunit 4 OS=Homo sapiens OX=9606 GN=ORC4 PE=1 SV=2;sp|O43929-2|ORC4_HUMAN Isoform 2 of Origin recognition complex subunit 4 OS=Homo sapiens OX=9606 GN=ORC4;sp|O43929-3|ORC4_HUMAN Isoform 3 of Origin recognit	4	6	6	6	2	3	2	3	4	3	3	3	4	3	3	5	2	3	3	1	2	2	2	3	2	1	2	3	2	3	4	3	3	3	4	3	3	5	2	3	3	1
O43933-2;O43933	O43933-2;O43933	3;3	3;3	3;3	Peroxisome biogenesis factor 1	PEX1	sp|O43933-2|PEX1_HUMAN Isoform 2 of Peroxisome biogenesis factor 1 OS=Homo sapiens OX=9606 GN=PEX1;sp|O43933|PEX1_HUMAN Peroxisome biogenesis factor 1 OS=Homo sapiens OX=9606 GN=PEX1 PE=1 SV=1	2	3	3	3	0	0	2	1	2	2	1	2	1	1	1	1	1	1	0	0	1	0	1	1	0	1	0	0	2	1	2	2	1	2	1	1	1	1	1	1	0	0
O60216;Q9H4I0	O60216	15;2	15;2	15;2	Double-strand-break repair protein rad21 homolog	RAD21	sp|O60216|RAD21_HUMAN Double-strand-break repair protein rad21 homolog OS=Homo sapiens OX=9606 GN=RAD21 PE=1 SV=2	2	15	15	15	11	10	8	7	8	7	11	9	9	7	10	12	8	7	10	10	8	9	7	6	11	10	11	10	8	7	8	7	11	9	9	7	10	12	8	7	10	10
O60220	O60220	7	7	7	Mitochondrial import inner membrane translocase subunit Tim8 A	TIMM8A	sp|O60220|TIM8A_HUMAN Mitochondrial import inner membrane translocase subunit Tim8 A OS=Homo sapiens OX=9606 GN=TIMM8A PE=1 SV=1	1	7	7	7	5	5	4	3	2	3	2	2	3	3	5	5	5	4	5	6	5	6	2	2	4	4	5	5	4	3	2	3	2	2	3	3	5	5	5	4	5	6
O60231	O60231	26	25	25	Putative pre-mRNA-splicing factor ATP-dependent RNA helicase DHX16	DHX16	sp|O60231|DHX16_HUMAN Pre-mRNA-splicing factor ATP-dependent RNA helicase DHX16 OS=Homo sapiens OX=9606 GN=DHX16 PE=1 SV=2	1	26	25	25	16	11	16	14	15	13	19	14	17	15	19	17	17	16	18	15	13	13	11	16	16	16	15	10	16	14	15	13	19	14	17	15	18	16	17	16	17	14
O60232	O60232	3	3	3	Sjoegren syndrome/scleroderma autoantigen 1	SSSCA1	sp|O60232|ZNRD2_HUMAN Protein ZNRD2 OS=Homo sapiens OX=9606 GN=ZNRD2 PE=1 SV=1	1	3	3	3	2	2	3	2	2	2	2	2	2	1	3	3	2	2	3	3	2	1	3	2	2	2	2	2	3	2	2	2	2	2	2	1	3	3	2	2	3	3
O60234	O60234	2	1	1	Glia maturation factor gamma	GMFG	sp|O60234|GMFG_HUMAN Glia maturation factor gamma OS=Homo sapiens OX=9606 GN=GMFG PE=1 SV=1	1	2	1	1	1	1	2	2	2	2	2	2	1	1	1	1	2	2	1	1	1	1	2	2	1	0	0	0	1	1	1	1	1	1	1	0	0	0	1	1	0	0
O60238-2;O60238	O60238-2;O60238	2;2	2;2	2;2	BCL2/adenovirus E1B 19 kDa protein-interacting protein 3-like	BNIP3L	sp|O60238-2|BNI3L_HUMAN Isoform 2 of BCL2/adenovirus E1B 19 kDa protein-interacting protein 3-like OS=Homo sapiens OX=9606 GN=BNIP3L;sp|O60238|BNI3L_HUMAN BCL2/adenovirus E1B 19 kDa protein-interacting protein 3-like OS=Homo sapiens OX=9606 GN=BNIP3L PE=1	2	2	2	2	0	0	1	2	2	2	2	2	1	2	2	1	1	2	0	1	0	0	2	1	1	1	0	0	1	2	2	2	2	2	1	2	2	1	1	2	0	1
O60239-2;O60239	O60239-2;O60239	2;2	2;2	2;2	SH3 domain-binding protein 5	SH3BP5	sp|O60239-2|3BP5_HUMAN Isoform 2 of SH3 domain-binding protein 5 OS=Homo sapiens OX=9606 GN=SH3BP5;sp|O60239|3BP5_HUMAN SH3 domain-binding protein 5 OS=Homo sapiens OX=9606 GN=SH3BP5 PE=1 SV=2	2	2	2	2	0	0	1	1	1	1	1	1	1	1	1	1	1	1	0	0	1	0	0	0	0	1	0	0	1	1	1	1	1	1	1	1	1	1	1	1	0	0
O60244	O60244	2	2	2	Mediator of RNA polymerase II transcription subunit 14	MED14	sp|O60244|MED14_HUMAN Mediator of RNA polymerase II transcription subunit 14 OS=Homo sapiens OX=9606 GN=MED14 PE=1 SV=2	1	2	2	2	0	0	0	1	2	0	0	1	0	1	2	1	0	1	0	0	0	0	1	1	1	0	0	0	0	1	2	0	0	1	0	1	2	1	0	1	0	0
O60256;O60256-4;O60256-2;O60256-3	O60256;O60256-4;O60256-2;O60256-3	11;10;10;9	11;10;10;9	10;9;9;8	Phosphoribosyl pyrophosphate synthase-associated protein 2	PRPSAP2	sp|O60256|KPRB_HUMAN Phosphoribosyl pyrophosphate synthase-associated protein 2 OS=Homo sapiens OX=9606 GN=PRPSAP2 PE=1 SV=1;sp|O60256-4|KPRB_HUMAN Isoform 4 of Phosphoribosyl pyrophosphate synthase-associated protein 2 OS=Homo sapiens OX=9606 GN=PRPSAP2;s	4	11	11	10	9	7	8	7	7	8	7	6	5	7	7	7	7	8	9	6	8	6	7	6	7	6	9	7	8	7	7	8	7	6	5	7	7	7	7	8	9	6
O60262	O60262	1	1	1	Guanine nucleotide-binding protein G(I)/G(S)/G(O) subunit gamma-7	GNG7	sp|O60262|GBG7_HUMAN Guanine nucleotide-binding protein G(I)/G(S)/G(O) subunit gamma-7 OS=Homo sapiens OX=9606 GN=GNG7 PE=1 SV=1	1	1	1	1	0	0	1	1	1	1	1	1	1	1	0	0	0	0	0	0	0	0	1	1	0	1	0	0	1	1	1	1	1	1	1	1	0	0	0	0	0	0
O60264	O60264	46	46	34	SWI/SNF-related matrix-associated actin-dependent regulator of chromatin subfamily A member 5	SMARCA5	sp|O60264|SMCA5_HUMAN SWI/SNF-related matrix-associated actin-dependent regulator of chromatin subfamily A member 5 OS=Homo sapiens OX=9606 GN=SMARCA5 PE=1 SV=1	1	46	46	34	29	28	31	30	29	32	28	28	31	28	39	36	34	30	32	25	24	27	29	29	33	33	29	28	31	30	29	32	28	28	31	28	39	36	34	30	32	25
O60271-4;O60271-2;O60271;O60271-5;O60271-3;O60271-9;Q9UPT6;Q9UPT6-2	O60271-4;O60271-2;O60271;O60271-5;O60271-3;O60271-9	44;43;43;37;36;33;3;2	44;43;43;37;36;33;3;2	44;43;43;37;36;33;3;2	C-Jun-amino-terminal kinase-interacting protein 4	SPAG9	sp|O60271-4|JIP4_HUMAN Isoform 4 of C-Jun-amino-terminal kinase-interacting protein 4 OS=Homo sapiens OX=9606 GN=SPAG9;sp|O60271-2|JIP4_HUMAN Isoform 2 of C-Jun-amino-terminal kinase-interacting protein 4 OS=Homo sapiens OX=9606 GN=SPAG9;sp|O60271|JIP4_HUM	8	44	44	44	24	18	34	32	32	33	34	31	29	32	34	29	30	27	27	20	22	23	30	26	28	29	24	18	34	32	32	33	34	31	29	32	34	29	30	27	27	20
O60287	O60287	5	5	5	Nucleolar pre-ribosomal-associated protein 1	URB1	sp|O60287|NPA1P_HUMAN Nucleolar pre-ribosomal-associated protein 1 OS=Homo sapiens OX=9606 GN=URB1 PE=1 SV=4	1	5	5	5	0	0	1	3	1	2	1	2	3	2	1	1	1	2	0	0	0	0	3	3	0	0	0	0	1	3	1	2	1	2	3	2	1	1	1	2	0	0
O60291-4;O60291;O60291-3;O60291-2	O60291-4;O60291;O60291-3;O60291-2	2;2;2;2	2;2;2;2	2;2;2;2	E3 ubiquitin-protein ligase MGRN1	MGRN1	sp|O60291-4|MGRN1_HUMAN Isoform 4 of E3 ubiquitin-protein ligase MGRN1 OS=Homo sapiens OX=9606 GN=MGRN1;sp|O60291|MGRN1_HUMAN E3 ubiquitin-protein ligase MGRN1 OS=Homo sapiens OX=9606 GN=MGRN1 PE=1 SV=2;sp|O60291-3|MGRN1_HUMAN Isoform 3 of E3 ubiquitin-pro	4	2	2	2	0	0	2	1	1	2	2	2	1	2	2	1	1	2	0	0	0	0	0	1	1	1	0	0	2	1	1	2	2	2	1	2	2	1	1	2	0	0
O60292	O60292	1	1	1	Signal-induced proliferation-associated 1-like protein 3	SIPA1L3	sp|O60292|SI1L3_HUMAN Signal-induced proliferation-associated 1-like protein 3 OS=Homo sapiens OX=9606 GN=SIPA1L3 PE=1 SV=3	1	1	1	1	0	0	0	0	1	0	1	0	0	1	0	0	0	0	0	0	0	0	0	0	0	0	0	0	0	0	1	0	1	0	0	1	0	0	0	0	0	0
O60293-2;O60293	O60293-2;O60293	1;1	1;1	1;1	Zinc finger C3H1 domain-containing protein	ZFC3H1	sp|O60293-2|ZC3H1_HUMAN Isoform 2 of Zinc finger C3H1 domain-containing protein OS=Homo sapiens OX=9606 GN=ZFC3H1;sp|O60293|ZC3H1_HUMAN Zinc finger C3H1 domain-containing protein OS=Homo sapiens OX=9606 GN=ZFC3H1 PE=1 SV=3	2	1	1	1	1	0	0	0	0	0	0	0	0	0	1	1	0	0	1	0	0	0	1	0	1	1	1	0	0	0	0	0	0	0	0	0	1	1	0	0	1	0
O60296;O60296-2	O60296;O60296-2	3;2	3;2	3;2	Trafficking kinesin-binding protein 2	TRAK2	sp|O60296|TRAK2_HUMAN Trafficking kinesin-binding protein 2 OS=Homo sapiens OX=9606 GN=TRAK2 PE=1 SV=2;sp|O60296-2|TRAK2_HUMAN Isoform 2 of Trafficking kinesin-binding protein 2 OS=Homo sapiens OX=9606 GN=TRAK2	2	3	3	3	0	0	3	1	2	3	2	3	2	3	1	1	2	2	0	0	0	0	2	2	2	1	0	0	3	1	2	3	2	3	2	3	1	1	2	2	0	0
O60306	O60306	14	14	14	Intron-binding protein aquarius	AQR	sp|O60306|AQR_HUMAN RNA helicase aquarius OS=Homo sapiens OX=9606 GN=AQR PE=1 SV=4	1	14	14	14	2	2	10	7	12	11	11	11	10	8	7	11	10	11	3	2	3	4	10	10	8	7	2	2	10	7	12	11	11	11	10	8	7	11	10	11	3	2
O60313-2;O60313-10;O60313-9;O60313;O60313-11;O60313-13	O60313-2;O60313-10;O60313-9;O60313;O60313-11;O60313-13	51;51;50;49;49;48	51;51;50;49;49;48	51;51;50;49;49;48	Dynamin-like 120 kDa protein, mitochondrial;Dynamin-like 120 kDa protein, form S1	OPA1	sp|O60313-2|OPA1_HUMAN Isoform 2 of Dynamin-like 120 kDa protein, mitochondrial OS=Homo sapiens OX=9606 GN=OPA1;sp|O60313-10|OPA1_HUMAN Isoform 4 of Dynamin-like 120 kDa protein, mitochondrial OS=Homo sapiens OX=9606 GN=OPA1;sp|O60313-9|OPA1_HUMAN Isoform	6	51	51	51	33	28	30	34	31	33	32	32	33	30	41	40	34	28	32	35	28	30	32	28	33	33	33	28	30	34	31	33	32	32	33	30	41	40	34	28	32	35
O60315-2;O60315;P37275-3;P37275-4;P37275-5;P37275;P37275-2	O60315-2;O60315	19;19;4;4;4;4;4	19;19;4;4;4;4;4	18;18;4;4;4;4;4	Zinc finger E-box-binding homeobox 2	ZEB2	sp|O60315-2|ZEB2_HUMAN Isoform 2 of Zinc finger E-box-binding homeobox 2 OS=Homo sapiens OX=9606 GN=ZEB2;sp|O60315|ZEB2_HUMAN Zinc finger E-box-binding homeobox 2 OS=Homo sapiens OX=9606 GN=ZEB2 PE=1 SV=1	7	19	19	18	4	4	8	10	11	10	9	9	10	9	11	12	9	9	7	5	3	6	11	9	11	10	4	4	8	10	11	10	9	9	10	9	11	12	9	9	7	5
O60318;O60318-2	O60318;O60318-2	4;3	4;3	4;3	Germinal-center associated nuclear protein	MCM3AP	sp|O60318|GANP_HUMAN Germinal-center associated nuclear protein OS=Homo sapiens OX=9606 GN=MCM3AP PE=1 SV=2;sp|O60318-2|GANP_HUMAN Isoform MCM3AP of Germinal-center associated nuclear protein OS=Homo sapiens OX=9606 GN=MCM3AP	2	4	4	4	0	0	2	0	1	1	1	0	1	1	1	1	1	1	2	0	1	2	0	1	1	1	0	0	2	0	1	1	1	0	1	1	1	1	1	1	2	0
O60333-2;O60333;O60333-4;O60333-3	O60333-2;O60333;O60333-4;O60333-3	18;18;18;12	18;18;18;12	15;15;15;9	Kinesin-like protein KIF1B	KIF1B	sp|O60333-2|KIF1B_HUMAN Isoform 2 of Kinesin-like protein KIF1B OS=Homo sapiens OX=9606 GN=KIF1B;sp|O60333|KIF1B_HUMAN Kinesin-like protein KIF1B OS=Homo sapiens OX=9606 GN=KIF1B PE=1 SV=5;sp|O60333-4|KIF1B_HUMAN Isoform 4 of Kinesin-like protein KIF1B OS=	4	18	18	15	6	5	8	8	9	12	10	10	6	9	10	12	13	11	10	7	5	7	9	6	9	6	6	5	8	8	9	12	10	10	6	9	10	12	13	11	10	7
O60341;O60341-2	O60341;O60341-2	20;19	20;19	20;19	Lysine-specific histone demethylase 1A	KDM1A	sp|O60341|KDM1A_HUMAN Lysine-specific histone demethylase 1A OS=Homo sapiens OX=9606 GN=KDM1A PE=1 SV=2;sp|O60341-2|KDM1A_HUMAN Isoform 2 of Lysine-specific histone demethylase 1A OS=Homo sapiens OX=9606 GN=KDM1A	2	20	20	20	9	7	13	11	12	11	10	12	10	10	11	13	15	14	11	13	10	10	9	9	9	8	9	7	13	11	12	11	10	12	10	10	11	13	15	14	11	13
O60343-2;O60343-3;O60343;O60343-5;O60343-4	O60343-2;O60343-3;O60343	13;13;13;4;2	13;13;13;4;2	12;12;12;4;2	TBC1 domain family member 4	TBC1D4	sp|O60343-2|TBCD4_HUMAN Isoform 2 of TBC1 domain family member 4 OS=Homo sapiens OX=9606 GN=TBC1D4;sp|O60343-3|TBCD4_HUMAN Isoform 3 of TBC1 domain family member 4 OS=Homo sapiens OX=9606 GN=TBC1D4;sp|O60343|TBCD4_HUMAN TBC1 domain family member 4 OS=Homo	5	13	13	12	6	5	9	5	6	4	5	6	5	5	8	8	3	6	9	7	2	3	3	2	0	0	6	5	9	5	6	4	5	6	5	5	8	8	3	6	9	7
O60361	O60361	10	1	1	Putative nucleoside diphosphate kinase	NME2P1	sp|O60361|NDK8_HUMAN Putative nucleoside diphosphate kinase OS=Homo sapiens OX=9606 GN=NME2P1 PE=5 SV=1	1	10	1	1	7	7	8	6	4	5	5	6	6	5	7	7	6	6	8	8	7	7	7	6	5	5	0	0	1	1	0	1	0	1	1	0	0	0	1	1	0	0
O60427	O60427	2	2	2	Fatty acid desaturase 1	FADS1	sp|O60427|FADS1_HUMAN Acyl-CoA (8-3)-desaturase OS=Homo sapiens OX=9606 GN=FADS1 PE=1 SV=3	1	2	2	2	0	0	1	0	1	1	2	2	1	1	1	2	1	1	0	0	0	0	1	1	0	0	0	0	1	0	1	1	2	2	1	1	1	2	1	1	0	0
O60443;O60443-3;O60443-2	O60443	11;5;2	11;5;2	11;5;2	Non-syndromic hearing impairment protein 5	DFNA5	sp|O60443|GSDME_HUMAN Gasdermin-E OS=Homo sapiens OX=9606 GN=GSDME PE=1 SV=2	3	11	11	11	4	5	3	3	6	6	6	5	6	6	5	6	6	6	4	5	6	7	5	5	6	5	4	5	3	3	6	6	6	5	6	6	5	6	6	6	4	5
O60447;O60447-2	O60447;O60447-2	1;1	1;1	1;1	Ecotropic viral integration site 5 protein homolog	EVI5	sp|O60447|EVI5_HUMAN Ecotropic viral integration site 5 protein homolog OS=Homo sapiens OX=9606 GN=EVI5 PE=1 SV=3;sp|O60447-2|EVI5_HUMAN Isoform 2 of Ecotropic viral integration site 5 protein homolog OS=Homo sapiens OX=9606 GN=EVI5	2	1	1	1	0	0	0	0	1	1	0	1	0	1	0	0	0	0	0	0	0	0	1	1	0	0	0	0	0	0	1	1	0	1	0	1	0	0	0	0	0	0
O60476	O60476	4	4	4	Mannosyl-oligosaccharide 1,2-alpha-mannosidase IB	MAN1A2	sp|O60476|MA1A2_HUMAN Mannosyl-oligosaccharide 1,2-alpha-mannosidase IB OS=Homo sapiens OX=9606 GN=MAN1A2 PE=1 SV=1	1	4	4	4	0	0	2	2	2	2	2	1	2	2	0	1	2	2	1	1	0	2	3	3	2	2	0	0	2	2	2	2	2	1	2	2	0	1	2	2	1	1
O60486	O60486	3	3	3	Plexin-C1	PLXNC1	sp|O60486|PLXC1_HUMAN Plexin-C1 OS=Homo sapiens OX=9606 GN=PLXNC1 PE=1 SV=1	1	3	3	3	1	0	2	2	1	1	2	0	2	2	1	1	2	1	0	0	0	0	0	0	1	0	1	0	2	2	1	1	2	0	2	2	1	1	2	1	0	0
O60488-2;O60488	O60488-2;O60488	33;33	29;29	29;29	Long-chain-fatty-acid--CoA ligase 4	ACSL4	sp|O60488-2|ACSL4_HUMAN Isoform Short of Long-chain-fatty-acid--CoA ligase 4 OS=Homo sapiens OX=9606 GN=ACSL4;sp|O60488|ACSL4_HUMAN Long-chain-fatty-acid--CoA ligase 4 OS=Homo sapiens OX=9606 GN=ACSL4 PE=1 SV=2	2	33	29	29	23	21	20	19	22	22	21	19	20	20	23	23	20	21	21	17	17	19	20	20	18	19	20	18	17	17	20	20	19	17	18	18	20	20	17	18	18	14
O60493;O60493-4;O60493-2;O60493-3	O60493;O60493-4;O60493-2	17;14;13;8	17;14;13;8	16;13;12;8	Sorting nexin-3	SNX3	sp|O60493|SNX3_HUMAN Sorting nexin-3 OS=Homo sapiens OX=9606 GN=SNX3 PE=1 SV=3;sp|O60493-4|SNX3_HUMAN Isoform 4 of Sorting nexin-3 OS=Homo sapiens OX=9606 GN=SNX3;sp|O60493-2|SNX3_HUMAN Isoform 2 of Sorting nexin-3 OS=Homo sapiens OX=9606 GN=SNX3	4	17	17	16	13	14	10	11	10	10	9	10	10	11	10	11	8	11	12	12	11	10	11	11	13	13	13	14	10	11	10	10	9	10	10	11	10	11	8	11	12	12
O60499;O60499-2	O60499;O60499-2	7;5	7;5	7;5	Syntaxin-10	STX10	sp|O60499|STX10_HUMAN Syntaxin-10 OS=Homo sapiens OX=9606 GN=STX10 PE=1 SV=1;sp|O60499-2|STX10_HUMAN Isoform 2 of Syntaxin-10 OS=Homo sapiens OX=9606 GN=STX10	2	7	7	7	3	1	2	5	2	4	2	3	3	3	6	6	5	5	2	3	2	2	4	4	6	5	3	1	2	5	2	4	2	3	3	3	6	6	5	5	2	3
O60502;O60502-4;O60502-2;O60502-3	O60502;O60502-4;O60502-2;O60502-3	16;15;14;10	16;15;14;10	16;15;14;10	Protein O-GlcNAcase	MGEA5	sp|O60502|OGA_HUMAN Protein O-GlcNAcase OS=Homo sapiens OX=9606 GN=OGA PE=1 SV=2;sp|O60502-4|OGA_HUMAN Isoform 4 of Protein O-GlcNAcase OS=Homo sapiens OX=9606 GN=OGA;sp|O60502-2|OGA_HUMAN Isoform 2 of Protein O-GlcNAcase OS=Homo sapiens OX=9606 GN=OGA;sp|	4	16	16	16	10	5	10	12	13	12	11	13	9	12	10	10	10	8	9	8	10	8	10	10	8	7	10	5	10	12	13	12	11	13	9	12	10	10	10	8	9	8
O60506;O60506-3;O60506-5	O60506;O60506-3;O60506-5	43;41;26	43;41;26	4;4;4	Heterogeneous nuclear ribonucleoprotein Q	SYNCRIP	sp|O60506|HNRPQ_HUMAN Heterogeneous nuclear ribonucleoprotein Q OS=Homo sapiens OX=9606 GN=SYNCRIP PE=1 SV=2;sp|O60506-3|HNRPQ_HUMAN Isoform 3 of Heterogeneous nuclear ribonucleoprotein Q OS=Homo sapiens OX=9606 GN=SYNCRIP;sp|O60506-5|HNRPQ_HUMAN Isoform 5	3	43	43	4	32	28	33	29	32	31	29	31	29	27	38	37	30	24	34	30	27	30	27	30	33	33	32	28	33	29	32	31	29	31	29	27	38	37	30	24	34	30
O60508	O60508	17	17	17	Pre-mRNA-processing factor 17	CDC40	sp|O60508|PRP17_HUMAN Pre-mRNA-processing factor 17 OS=Homo sapiens OX=9606 GN=CDC40 PE=1 SV=1	1	17	17	17	6	7	10	8	9	9	9	8	10	11	8	6	7	7	7	6	8	4	10	10	6	5	6	7	10	8	9	9	9	8	10	11	8	6	7	7	7	6
O60518	O60518	4	2	2	Ran-binding protein 6	RANBP6	sp|O60518|RNBP6_HUMAN Ran-binding protein 6 OS=Homo sapiens OX=9606 GN=RANBP6 PE=1 SV=2	1	4	2	2	2	2	1	1	0	1	1	1	1	1	0	0	1	1	3	2	1	4	0	0	2	1	1	1	1	1	0	1	1	1	1	1	0	0	1	1	1	1
O60524-4;O60524-5;O60524-3;O60524;O60524-2	O60524-4;O60524-5;O60524-3;O60524;O60524-2	6;6;6;6;3	6;6;6;6;3	6;6;6;6;3	Nuclear export mediator factor NEMF	NEMF	sp|O60524-4|NEMF_HUMAN Isoform 4 of Nuclear export mediator factor NEMF OS=Homo sapiens OX=9606 GN=NEMF;sp|O60524-5|NEMF_HUMAN Isoform 5 of Nuclear export mediator factor NEMF OS=Homo sapiens OX=9606 GN=NEMF;sp|O60524-3|NEMF_HUMAN Isoform 3 of Nuclear expo	5	6	6	6	1	2	3	3	4	1	1	2	2	2	1	1	2	2	2	1	3	1	2	2	1	1	1	2	3	3	4	1	1	2	2	2	1	1	2	2	2	1
O60547-2;O60547	O60547-2;O60547	12;12	12;12	12;12	GDP-mannose 4,6 dehydratase	GMDS	sp|O60547-2|GMDS_HUMAN Isoform 2 of GDP-mannose 4,6 dehydratase OS=Homo sapiens OX=9606 GN=GMDS;sp|O60547|GMDS_HUMAN GDP-mannose 4,6 dehydratase OS=Homo sapiens OX=9606 GN=GMDS PE=1 SV=1	2	12	12	12	6	6	9	6	7	5	7	5	7	6	7	7	5	6	7	8	7	6	6	7	6	5	6	6	9	6	7	5	7	5	7	6	7	7	5	6	7	8
O60551	O60551	6	2	2	Glycylpeptide N-tetradecanoyltransferase 2	NMT2	sp|O60551|NMT2_HUMAN Glycylpeptide N-tetradecanoyltransferase 2 OS=Homo sapiens OX=9606 GN=NMT2 PE=1 SV=1	1	6	2	2	1	2	5	4	5	5	5	4	3	2	3	3	4	5	1	1	1	1	5	6	3	2	0	1	1	1	1	1	1	1	0	0	0	0	1	1	0	0
O60563;O60563-2	O60563	12;2	12;2	12;2	Cyclin-T1	CCNT1	sp|O60563|CCNT1_HUMAN Cyclin-T1 OS=Homo sapiens OX=9606 GN=CCNT1 PE=1 SV=1	2	12	12	12	6	4	7	8	8	10	8	8	9	8	9	7	8	5	6	4	3	5	6	6	7	8	6	4	7	8	8	10	8	8	9	8	9	7	8	5	6	4
O60566-3;O60566;O60566-2	O60566-3;O60566;O60566-2	5;5;4	5;5;4	5;5;4	Mitotic checkpoint serine/threonine-protein kinase BUB1 beta	BUB1B	sp|O60566-3|BUB1B_HUMAN Isoform 3 of Mitotic checkpoint serine/threonine-protein kinase BUB1 beta OS=Homo sapiens OX=9606 GN=BUB1B;sp|O60566|BUB1B_HUMAN Mitotic checkpoint serine/threonine-protein kinase BUB1 beta OS=Homo sapiens OX=9606 GN=BUB1B PE=1 SV=3	3	5	5	5	0	0	3	2	3	1	3	2	2	2	2	1	2	2	0	0	0	2	2	2	0	1	0	0	3	2	3	1	3	2	2	2	2	1	2	2	0	0
O60568	O60568	38	38	38	Procollagen-lysine,2-oxoglutarate 5-dioxygenase 3	PLOD3	sp|O60568|PLOD3_HUMAN Multifunctional procollagen lysine hydroxylase and glycosyltransferase LH3 OS=Homo sapiens OX=9606 GN=PLOD3 PE=1 SV=1	1	38	38	38	31	29	30	24	26	24	23	25	24	23	30	32	27	26	30	34	22	26	22	24	29	30	31	29	30	24	26	24	23	25	24	23	30	32	27	26	30	34
O60573;O60573-2	O60573;O60573-2	4;3	4;3	4;3	Eukaryotic translation initiation factor 4E type 2	EIF4E2	sp|O60573|IF4E2_HUMAN Eukaryotic translation initiation factor 4E type 2 OS=Homo sapiens OX=9606 GN=EIF4E2 PE=1 SV=1;sp|O60573-2|IF4E2_HUMAN Isoform 2 of Eukaryotic translation initiation factor 4E type 2 OS=Homo sapiens OX=9606 GN=EIF4E2	2	4	4	4	2	2	2	2	2	2	2	2	2	2	2	2	1	2	2	1	1	2	2	2	2	2	2	2	2	2	2	2	2	2	2	2	2	2	1	2	2	1
O60610-2;O60610-3;O60610	O60610-2;O60610-3;O60610	35;35;35	35;35;35	35;35;35	Protein diaphanous homolog 1	DIAPH1	sp|O60610-2|DIAP1_HUMAN Isoform 2 of Protein diaphanous homolog 1 OS=Homo sapiens OX=9606 GN=DIAPH1;sp|O60610-3|DIAP1_HUMAN Isoform 3 of Protein diaphanous homolog 1 OS=Homo sapiens OX=9606 GN=DIAPH1;sp|O60610|DIAP1_HUMAN Protein diaphanous homolog 1 OS=Ho	3	35	35	35	16	16	23	24	21	21	20	22	21	20	23	25	19	21	18	16	16	20	21	17	16	20	16	16	23	24	21	21	20	22	21	20	23	25	19	21	18	16
O60613;O60613-2	O60613	6;2	6;2	6;2	15 kDa selenoprotein	2015-09-01	sp|O60613|SEP15_HUMAN Selenoprotein F OS=Homo sapiens OX=9606 GN=SELENOF PE=1 SV=4	2	6	6	6	3	2	5	5	5	3	3	4	5	5	5	6	5	6	4	2	1	3	5	4	3	3	3	2	5	5	5	3	3	4	5	5	5	6	5	6	4	2
O60645	O60645	4	4	4	Exocyst complex component 3	EXOC3	sp|O60645|EXOC3_HUMAN Exocyst complex component 3 OS=Homo sapiens OX=9606 GN=EXOC3 PE=1 SV=3	1	4	4	4	0	0	3	4	3	3	4	3	4	3	2	2	3	3	1	1	0	0	3	3	3	3	0	0	3	4	3	3	4	3	4	3	2	2	3	3	1	1
O60658-2;O60658;O60658-6;O60658-4;O60658-3;O60658-5	O60658-2;O60658;O60658-6	3;3;2;1;1;1	3;3;2;1;1;1	3;3;2;1;1;1	High affinity cAMP-specific and IBMX-insensitive 3,5-cyclic phosphodiesterase 8A	PDE8A	sp|O60658-2|PDE8A_HUMAN Isoform 2 of High affinity cAMP-specific and IBMX-insensitive 3,5-cyclic phosphodiesterase 8A OS=Homo sapiens OX=9606 GN=PDE8A;sp|O60658|PDE8A_HUMAN High affinity cAMP-specific and IBMX-insensitive 3,5-cyclic phosphodiesterase 8	6	3	3	3	0	0	1	2	2	2	2	2	1	1	1	3	2	2	1	0	1	0	0	1	0	0	0	0	1	2	2	2	2	2	1	1	1	3	2	2	1	0
O60664;O60664-4;O60664-3	O60664;O60664-4;O60664-3	26;25;25	26;25;25	13;12;13	Perilipin-3	PLIN3	sp|O60664|PLIN3_HUMAN Perilipin-3 OS=Homo sapiens OX=9606 GN=PLIN3 PE=1 SV=3;sp|O60664-4|PLIN3_HUMAN Isoform 4 of Perilipin-3 OS=Homo sapiens OX=9606 GN=PLIN3;sp|O60664-3|PLIN3_HUMAN Isoform 3 of Perilipin-3 OS=Homo sapiens OX=9606 GN=PLIN3	3	26	26	13	21	20	19	22	19	18	18	19	17	16	20	22	19	18	20	17	20	18	18	16	21	21	21	20	19	22	19	18	18	19	17	16	20	22	19	18	20	17
O60671;O60671-2;O60671-3	O60671;O60671-2	3;3;1	3;3;1	3;3;1	Cell cycle checkpoint protein RAD1	RAD1	sp|O60671|RAD1_HUMAN Cell cycle checkpoint protein RAD1 OS=Homo sapiens OX=9606 GN=RAD1 PE=1 SV=1;sp|O60671-2|RAD1_HUMAN Isoform 2 of Cell cycle checkpoint protein RAD1 OS=Homo sapiens OX=9606 GN=RAD1	3	3	3	3	0	0	1	2	2	3	0	1	1	1	1	2	3	1	0	0	0	0	1	1	1	0	0	0	1	2	2	3	0	1	1	1	1	2	3	1	0	0
O60678;O60678-2	O60678;O60678-2	3;2	3;2	3;2	Protein arginine N-methyltransferase 3	PRMT3	sp|O60678|ANM3_HUMAN Protein arginine N-methyltransferase 3 OS=Homo sapiens OX=9606 GN=PRMT3 PE=1 SV=4;sp|O60678-2|ANM3_HUMAN Isoform 2 of Protein arginine N-methyltransferase 3 OS=Homo sapiens OX=9606 GN=PRMT3	2	3	3	3	1	0	2	2	2	1	1	1	2	1	1	2	2	2	0	0	1	1	1	1	1	1	1	0	2	2	2	1	1	1	2	1	1	2	2	2	0	0
O60684	O60684	20	20	11	Importin subunit alpha-7	KPNA6	sp|O60684|IMA7_HUMAN Importin subunit alpha-7 OS=Homo sapiens OX=9606 GN=KPNA6 PE=1 SV=1	1	20	20	11	16	14	11	12	12	12	11	12	14	13	16	16	15	13	15	13	14	16	14	13	12	12	16	14	11	12	12	12	11	12	14	13	16	16	15	13	15	13
O60701;O60701-2;O60701-3	O60701;O60701-2;O60701-3	26;24;21	26;24;21	26;24;21	UDP-glucose 6-dehydrogenase	UGDH	sp|O60701|UGDH_HUMAN UDP-glucose 6-dehydrogenase OS=Homo sapiens OX=9606 GN=UGDH PE=1 SV=1;sp|O60701-2|UGDH_HUMAN Isoform 2 of UDP-glucose 6-dehydrogenase OS=Homo sapiens OX=9606 GN=UGDH;sp|O60701-3|UGDH_HUMAN Isoform 3 of UDP-glucose 6-dehydrogenase OS=Ho	3	26	26	26	25	21	21	21	20	19	19	20	17	16	25	24	21	20	23	23	15	18	16	17	17	18	25	21	21	21	20	19	19	20	17	16	25	24	21	20	23	23
O60711;O60711-2	O60711;O60711-2	8;8	8;8	8;8	Leupaxin	LPXN	sp|O60711|LPXN_HUMAN Leupaxin OS=Homo sapiens OX=9606 GN=LPXN PE=1 SV=1;sp|O60711-2|LPXN_HUMAN Isoform 2 of Leupaxin OS=Homo sapiens OX=9606 GN=LPXN	2	8	8	8	5	4	6	7	0	1	1	1	0	2	6	6	6	7	7	6	0	0	0	1	0	0	5	4	6	7	0	1	1	1	0	2	6	6	6	7	7	6
O60716-3;O60716-5;O60716;O60716-2;O60716-7;O60716-8;O60716-11;O60716-13;O60716-4;O60716-6;O60716-9;O60716-10;O60716-16;O60716-15;O60716-21;O60716-19;O60716-14;O60716-12;O60716-17;O60716-18;O60716-23;O60716-24;O60716-20;O60716-22;O60716-27;O60716-29;O60716-25;O60716-26;O60716-31;O60716-32;O60716-28;O60716-30	O60716-3;O60716-5;O60716;O60716-2;O60716-7;O60716-8;O60716-11;O60716-13;O60716-4;O60716-6;O60716-9;O60716-10;O60716-16;O60716-15;O60716-21;O60716-19;O60716-14;O60716-12;O60716-17;O60716-18;O60716-23;O60716-24;O60716-20;O60716-22;O60716-27;O60716-29;O60716-25;O60716-26;O60716-31;O60716-32;O60716-28;O60716-30	54;54;52;52;51;51;51;51;49;49;49;49;48;48;47;47;46;46;45;45;44;44;42;42;35;35;33;33;32;32;30;30	54;54;52;52;51;51;51;51;49;49;49;49;48;48;47;47;46;46;45;45;44;44;42;42;35;35;33;33;32;32;30;30	54;54;52;52;51;51;51;51;49;49;49;49;48;48;47;47;46;46;45;45;44;44;42;42;35;35;33;33;32;32;30;30	Catenin delta-1	CTNND1	sp|O60716-3|CTND1_HUMAN Isoform 1AC of Catenin delta-1 OS=Homo sapiens OX=9606 GN=CTNND1;sp|O60716-5|CTND1_HUMAN Isoform 1A of Catenin delta-1 OS=Homo sapiens OX=9606 GN=CTNND1;sp|O60716|CTND1_HUMAN Catenin delta-1 OS=Homo sapiens OX=9606 GN=CTNND1 PE=1 SV	32	54	54	54	37	40	34	35	31	35	33	31	26	27	42	39	35	30	38	35	27	31	26	29	36	32	37	40	34	35	31	35	33	31	26	27	42	39	35	30	38	35
O60725	O60725	2	2	2	Protein-S-isoprenylcysteine O-methyltransferase	ICMT	sp|O60725|ICMT_HUMAN Protein-S-isoprenylcysteine O-methyltransferase OS=Homo sapiens OX=9606 GN=ICMT PE=1 SV=1	1	2	2	2	1	0	0	2	1	1	2	2	2	2	2	2	2	2	2	0	0	1	2	2	0	0	1	0	0	2	1	1	2	2	2	2	2	2	2	2	2	0
O60739	O60739	9	3	3	Eukaryotic translation initiation factor 1b	EIF1B	sp|O60739|EIF1B_HUMAN Eukaryotic translation initiation factor 1b OS=Homo sapiens OX=9606 GN=EIF1B PE=1 SV=2	1	9	3	3	5	3	8	8	7	6	7	7	6	8	7	8	7	8	6	4	6	6	7	7	5	5	1	1	3	3	3	2	3	3	2	3	3	3	3	3	1	1
O60749;O60749-2	O60749;O60749-2	27;26	27;26	26;25	Sorting nexin-2	SNX2	sp|O60749|SNX2_HUMAN Sorting nexin-2 OS=Homo sapiens OX=9606 GN=SNX2 PE=1 SV=2;sp|O60749-2|SNX2_HUMAN Isoform 2 of Sorting nexin-2 OS=Homo sapiens OX=9606 GN=SNX2	2	27	27	26	19	17	16	14	13	13	12	10	15	13	19	20	12	12	19	12	16	15	12	12	18	15	19	17	16	14	13	13	12	10	15	13	19	20	12	12	19	12
O60762	O60762	7	7	7	Dolichol-phosphate mannosyltransferase subunit 1	DPM1	sp|O60762|DPM1_HUMAN Dolichol-phosphate mannosyltransferase subunit 1 OS=Homo sapiens OX=9606 GN=DPM1 PE=1 SV=1	1	7	7	7	4	4	4	3	5	5	4	5	4	6	6	5	5	4	5	5	5	5	5	5	6	6	4	4	4	3	5	5	4	5	4	6	6	5	5	4	5	5
O60763;O60763-2	O60763;O60763-2	35;35	35;35	35;35	General vesicular transport factor p115	USO1	sp|O60763|USO1_HUMAN General vesicular transport factor p115 OS=Homo sapiens OX=9606 GN=USO1 PE=1 SV=2;sp|O60763-2|USO1_HUMAN Isoform 2 of General vesicular transport factor p115 OS=Homo sapiens OX=9606 GN=USO1	2	35	35	35	23	23	26	24	24	25	26	26	24	23	28	28	27	25	28	27	23	21	21	23	25	24	23	23	26	24	24	25	26	26	24	23	28	28	27	25	28	27
O60783	O60783	2	2	2	28S ribosomal protein S14, mitochondrial	MRPS14	sp|O60783|RT14_HUMAN 28S ribosomal protein S14, mitochondrial OS=Homo sapiens OX=9606 GN=MRPS14 PE=1 SV=1	1	2	2	2	2	2	2	2	2	2	2	2	2	2	2	2	2	2	2	2	2	2	2	2	2	2	2	2	2	2	2	2	2	2	2	2	2	2	2	2	2	2
O60784-4;O60784;O60784-2;O60784-3	O60784-4;O60784;O60784-2;O60784-3	14;14;14;10	14;14;14;10	14;14;14;10	Target of Myb protein 1	TOM1	sp|O60784-4|TOM1_HUMAN Isoform 4 of Target of Myb protein 1 OS=Homo sapiens OX=9606 GN=TOM1;sp|O60784|TOM1_HUMAN Target of Myb protein 1 OS=Homo sapiens OX=9606 GN=TOM1 PE=1 SV=2;sp|O60784-2|TOM1_HUMAN Isoform 2 of Target of Myb protein 1 OS=Homo sapiens O	4	14	14	14	8	6	11	9	8	10	9	10	7	7	9	10	10	8	9	9	7	8	5	6	8	9	8	6	11	9	8	10	9	10	7	7	9	10	10	8	9	9
O60825-2;O60825;P16118-2;P16118	O60825-2;O60825	10;10;2;2	10;10;2;2	7;7;0;0	6-phosphofructo-2-kinase/fructose-2,6-bisphosphatase 2;6-phosphofructo-2-kinase;Fructose-2,6-bisphosphatase	PFKFB2	sp|O60825-2|F262_HUMAN Isoform 2 of 6-phosphofructo-2-kinase/fructose-2,6-bisphosphatase 2 OS=Homo sapiens OX=9606 GN=PFKFB2;sp|O60825|F262_HUMAN 6-phosphofructo-2-kinase/fructose-2,6-bisphosphatase 2 OS=Homo sapiens OX=9606 GN=PFKFB2 PE=1 SV=2	4	10	10	7	3	3	7	3	6	5	4	6	4	3	6	5	3	4	4	3	2	5	5	6	3	3	3	3	7	3	6	5	4	6	4	3	6	5	3	4	4	3
O60826	O60826	16	16	16	Coiled-coil domain-containing protein 22	CCDC22	sp|O60826|CCD22_HUMAN Coiled-coil domain-containing protein 22 OS=Homo sapiens OX=9606 GN=CCDC22 PE=1 SV=1	1	16	16	16	7	7	11	9	12	14	14	12	9	11	13	13	9	9	11	9	8	10	9	9	11	10	7	7	11	9	12	14	14	12	9	11	13	13	9	9	11	9
O60828-2;O60828;O60828-5;O60828-4;O60828-3;O60828-6;O60828-10;O60828-9;O60828-8;O60828-7	O60828-2;O60828;O60828-5;O60828-4;O60828-3	5;5;4;3;3;2;1;1;1;1	5;5;4;3;3;2;1;1;1;1	5;5;4;3;3;2;1;1;1;1	Polyglutamine-binding protein 1	PQBP1	sp|O60828-2|PQBP1_HUMAN Isoform 2 of Polyglutamine-binding protein 1 OS=Homo sapiens OX=9606 GN=PQBP1;sp|O60828|PQBP1_HUMAN Polyglutamine-binding protein 1 OS=Homo sapiens OX=9606 GN=PQBP1 PE=1 SV=1;sp|O60828-5|PQBP1_HUMAN Isoform 5 of Polyglutamine-bindin	10	5	5	5	4	4	2	3	4	3	2	4	3	2	4	4	4	3	5	4	5	5	2	2	3	3	4	4	2	3	4	3	2	4	3	2	4	4	4	3	5	4
O60831	O60831	4	4	3	PRA1 family protein 2	PRAF2	sp|O60831|PRAF2_HUMAN PRA1 family protein 2 OS=Homo sapiens OX=9606 GN=PRAF2 PE=1 SV=1	1	4	4	3	1	1	2	1	3	3	2	4	3	2	2	3	1	0	1	1	0	0	1	1	1	2	1	1	2	1	3	3	2	4	3	2	2	3	1	0	1	1
O60832;O60832-2	O60832;O60832-2	22;17	22;17	22;17	H/ACA ribonucleoprotein complex subunit 4	DKC1	sp|O60832|DKC1_HUMAN H/ACA ribonucleoprotein complex subunit DKC1 OS=Homo sapiens OX=9606 GN=DKC1 PE=1 SV=3;sp|O60832-2|DKC1_HUMAN Isoform 3 of H/ACA ribonucleoprotein complex subunit DKC1 OS=Homo sapiens OX=9606 GN=DKC1	2	22	22	22	12	11	14	18	18	16	16	15	16	17	18	17	20	15	16	12	13	16	16	16	17	15	12	11	14	18	18	16	16	15	16	17	18	17	20	15	16	12
O60841	O60841	37	37	37	Eukaryotic translation initiation factor 5B	EIF5B	sp|O60841|IF2P_HUMAN Eukaryotic translation initiation factor 5B OS=Homo sapiens OX=9606 GN=EIF5B PE=1 SV=4	1	37	37	37	21	16	24	25	26	26	25	23	23	24	27	29	26	22	27	23	24	21	26	24	23	23	21	16	24	25	26	26	25	23	23	24	27	29	26	22	27	23
O60861-2;O60861-1;O60861-4;O60861	O60861-2;O60861-1;O60861-4;O60861	6;6;6;6	6;6;6;6	6;6;6;6	Growth arrest-specific protein 7	GAS7	sp|O60861-2|GAS7_HUMAN Isoform 2 of Growth arrest-specific protein 7 OS=Homo sapiens OX=9606 GN=GAS7;sp|O60861-1|GAS7_HUMAN Isoform 1 of Growth arrest-specific protein 7 OS=Homo sapiens OX=9606 GN=GAS7;sp|O60861-4|GAS7_HUMAN Isoform 4 of Growth arrest-spec	4	6	6	6	1	1	3	3	2	2	2	1	1	2	3	2	3	3	3	0	3	2	2	1	2	1	1	1	3	3	2	2	2	1	1	2	3	2	3	3	3	0
O60869;O60869-2;O60869-3	O60869;O60869-2;O60869-3	11;10;10	11;10;10	11;10;10	Endothelial differentiation-related factor 1	EDF1	sp|O60869|EDF1_HUMAN Endothelial differentiation-related factor 1 OS=Homo sapiens OX=9606 GN=EDF1 PE=1 SV=1;sp|O60869-2|EDF1_HUMAN Isoform 2 of Endothelial differentiation-related factor 1 OS=Homo sapiens OX=9606 GN=EDF1;sp|O60869-3|EDF1_HUMAN Isoform 3 of	3	11	11	11	6	3	4	6	6	6	5	5	4	6	7	7	7	4	5	8	9	7	6	5	9	8	6	3	4	6	6	6	5	5	4	6	7	7	7	4	5	8
O60870;O60870-2	O60870;O60870-2	8;7	8;7	8;7	DNA/RNA-binding protein KIN17	KIN	sp|O60870|KIN17_HUMAN DNA/RNA-binding protein KIN17 OS=Homo sapiens OX=9606 GN=KIN PE=1 SV=2;sp|O60870-2|KIN17_HUMAN Isoform 2 of DNA/RNA-binding protein KIN17 OS=Homo sapiens OX=9606 GN=KIN	2	8	8	8	4	1	6	5	4	6	5	5	6	4	7	6	4	5	6	5	4	1	3	4	2	3	4	1	6	5	4	6	5	5	6	4	7	6	4	5	6	5
O60879-2;O60879-3;O60879	O60879-2;O60879-3;O60879	8;8;8	8;8;8	8;8;8	Protein diaphanous homolog 2	DIAPH2	sp|O60879-2|DIAP2_HUMAN Isoform 2 of Protein diaphanous homolog 2 OS=Homo sapiens OX=9606 GN=DIAPH2;sp|O60879-3|DIAP2_HUMAN Isoform 3 of Protein diaphanous homolog 2 OS=Homo sapiens OX=9606 GN=DIAPH2;sp|O60879|DIAP2_HUMAN Protein diaphanous homolog 2 OS=Ho	3	8	8	8	1	2	4	3	3	2	1	2	2	3	4	4	3	2	3	1	1	1	1	2	2	1	1	2	4	3	3	2	1	2	2	3	4	4	3	2	3	1
O60884	O60884	17	17	17	DnaJ homolog subfamily A member 2	DNAJA2	sp|O60884|DNJA2_HUMAN DnaJ homolog subfamily A member 2 OS=Homo sapiens OX=9606 GN=DNAJA2 PE=1 SV=1	1	17	17	17	10	8	12	11	13	11	11	12	13	12	12	13	10	12	12	15	8	11	9	11	7	7	10	8	12	11	13	11	11	12	13	12	12	13	10	12	12	15
O60885;O60885-2;O60885-3	O60885;O60885-2;O60885-3	17;13;13	17;13;13	11;7;7	Bromodomain-containing protein 4	BRD4	sp|O60885|BRD4_HUMAN Bromodomain-containing protein 4 OS=Homo sapiens OX=9606 GN=BRD4 PE=1 SV=2;sp|O60885-2|BRD4_HUMAN Isoform C of Bromodomain-containing protein 4 OS=Homo sapiens OX=9606 GN=BRD4;sp|O60885-3|BRD4_HUMAN Isoform B of Bromodomain-containing	3	17	17	11	5	4	7	9	10	11	9	8	8	9	7	7	9	8	7	9	8	6	8	9	7	4	5	4	7	9	10	11	9	8	8	9	7	7	9	8	7	9
O60888-3;O60888;O60888-2	O60888-3;O60888;O60888-2	4;4;4	4;4;4	4;4;4	Protein CutA	CUTA	sp|O60888-3|CUTA_HUMAN Isoform C of Protein CutA OS=Homo sapiens OX=9606 GN=CUTA;sp|O60888|CUTA_HUMAN Protein CutA OS=Homo sapiens OX=9606 GN=CUTA PE=1 SV=2;sp|O60888-2|CUTA_HUMAN Isoform A of Protein CutA OS=Homo sapiens OX=9606 GN=CUTA	3	4	4	4	3	3	3	2	4	4	2	3	3	2	4	3	4	4	2	2	2	3	2	2	3	4	3	3	3	2	4	4	2	3	3	2	4	3	4	4	2	2
O60921;O60921-2	O60921;O60921-2	3;2	3;2	3;2	Checkpoint protein HUS1	HUS1	sp|O60921|HUS1_HUMAN Checkpoint protein HUS1 OS=Homo sapiens OX=9606 GN=HUS1 PE=1 SV=1;sp|O60921-2|HUS1_HUMAN Isoform 2 of Checkpoint protein HUS1 OS=Homo sapiens OX=9606 GN=HUS1	2	3	3	3	0	0	2	2	2	2	2	2	1	2	1	2	3	2	0	1	1	0	1	1	1	1	0	0	2	2	2	2	2	2	1	2	1	2	3	2	0	1
O60925	O60925	5	5	5	Prefoldin subunit 1	PFDN1	sp|O60925|PFD1_HUMAN Prefoldin subunit 1 OS=Homo sapiens OX=9606 GN=PFDN1 PE=1 SV=2	1	5	5	5	3	3	4	2	2	3	3	2	3	3	4	4	3	2	5	3	1	2	3	2	3	4	3	3	4	2	2	3	3	2	3	3	4	4	3	2	5	3
O60927	O60927	5	5	5	Protein phosphatase 1 regulatory subunit 11	PPP1R11	sp|O60927|PP1RB_HUMAN E3 ubiquitin-protein ligase PPP1R11 OS=Homo sapiens OX=9606 GN=PPP1R11 PE=1 SV=1	1	5	5	5	2	0	1	4	5	5	5	4	5	5	4	4	4	5	3	3	2	3	4	4	2	2	2	0	1	4	5	5	5	4	5	5	4	4	4	5	3	3
O60930	O60930	1	1	1	Ribonuclease H1	RNASEH1	sp|O60930|RNH1_HUMAN Ribonuclease H1 OS=Homo sapiens OX=9606 GN=RNASEH1 PE=1 SV=2	1	1	1	1	0	0	0	0	0	0	0	0	0	0	0	0	0	0	0	0	0	1	1	1	1	1	0	0	0	0	0	0	0	0	0	0	0	0	0	0	0	0
O60936;O60936-3	O60936;O60936-3	2;2	2;2	2;2	Nucleolar protein 3	NOL3	sp|O60936|NOL3_HUMAN Nucleolar protein 3 OS=Homo sapiens OX=9606 GN=NOL3 PE=1 SV=2;sp|O60936-3|NOL3_HUMAN Isoform 3 of Nucleolar protein 3 OS=Homo sapiens OX=9606 GN=NOL3	2	2	2	2	1	0	1	1	1	0	1	1	0	1	1	1	1	1	2	1	0	0	1	0	0	0	1	0	1	1	1	0	1	1	0	1	1	1	1	1	2	1
O60942-2;O60942;O60942-4;O60942-3	O60942-2;O60942;O60942-4;O60942-3	13;13;10;9	13;13;10;9	13;13;10;9	mRNA-capping enzyme;Polynucleotide 5-triphosphatase;mRNA guanylyltransferase	RNGTT	sp|O60942-2|MCE1_HUMAN Isoform 2 of mRNA-capping enzyme OS=Homo sapiens OX=9606 GN=RNGTT;sp|O60942|MCE1_HUMAN mRNA-capping enzyme OS=Homo sapiens OX=9606 GN=RNGTT PE=1 SV=1;sp|O60942-4|MCE1_HUMAN Isoform 4 of mRNA-capping enzyme OS=Homo sapiens OX=9606 GN=	4	13	13	13	7	3	7	7	6	6	7	7	7	6	9	9	8	7	8	7	4	3	4	5	3	3	7	3	7	7	6	6	7	7	7	6	9	9	8	7	8	7
O75027-2;O75027;O75027-3	O75027-2;O75027;O75027-3	3;3;2	3;3;2	3;3;2	ATP-binding cassette sub-family B member 7, mitochondrial	ABCB7	sp|O75027-2|ABCB7_HUMAN Isoform 2 of ATP-binding cassette sub-family B member 7, mitochondrial OS=Homo sapiens OX=9606 GN=ABCB7;sp|O75027|ABCB7_HUMAN ATP-binding cassette sub-family B member 7, mitochondrial OS=Homo sapiens OX=9606 GN=ABCB7 PE=1 SV=2;sp|O7	3	3	3	3	0	0	3	1	2	2	1	2	1	1	2	1	2	2	0	1	1	1	3	3	0	1	0	0	3	1	2	2	1	2	1	1	2	1	2	2	0	1
O75030-10;O75030-9;O75030-12;O75030-4;O75030-3;O75030-8;O75030-7;O75030-6;O75030-2;O75030-5;O75030;O75030-11	O75030-10;O75030-9;O75030-12;O75030-4;O75030-3;O75030-8;O75030-7;O75030-6;O75030-2;O75030-5;O75030;O75030-11	7;7;6;6;6;6;6;6;6;6;6;5	7;7;6;6;6;6;6;6;6;6;6;5	6;6;5;5;5;5;5;5;5;5;5;4	Microphthalmia-associated transcription factor	MITF	sp|O75030-10|MITF_HUMAN Isoform M2 of Microphthalmia-associated transcription factor OS=Homo sapiens OX=9606 GN=MITF;sp|O75030-9|MITF_HUMAN Isoform M1 of Microphthalmia-associated transcription factor OS=Homo sapiens OX=9606 GN=MITF;sp|O75030-12|MITF_HUMAN	12	7	7	6	3	4	6	6	5	5	5	5	4	6	7	6	7	5	5	4	3	5	6	5	3	2	3	4	6	6	5	5	5	5	4	6	7	6	7	5	5	4
O75044;P0DMP2;P0DJJ0;Q7Z6B7-2;Q7Z6B7	O75044	15;7;7;2;2	15;7;7;2;2	15;7;7;2;2	SLIT-ROBO Rho GTPase-activating protein 2	SRGAP2	sp|O75044|SRGP2_HUMAN SLIT-ROBO Rho GTPase-activating protein 2 OS=Homo sapiens OX=9606 GN=SRGAP2 PE=1 SV=3	5	15	15	15	0	2	7	5	8	7	10	9	8	7	5	6	5	2	4	4	4	5	8	8	5	5	0	2	7	5	8	7	10	9	8	7	5	6	5	2	4	4
O75052;O75052-3;O75052-2	O75052;O75052-3;O75052-2	2;2;1	2;2;1	2;2;1	Carboxyl-terminal PDZ ligand of neuronal nitric oxide synthase protein	NOS1AP	sp|O75052|CAPON_HUMAN Carboxyl-terminal PDZ ligand of neuronal nitric oxide synthase protein OS=Homo sapiens OX=9606 GN=NOS1AP PE=1 SV=3;sp|O75052-3|CAPON_HUMAN Isoform 3 of Carboxyl-terminal PDZ ligand of neuronal nitric oxide synthase protein OS=Homo sap	3	2	2	2	0	0	2	2	2	2	2	1	1	1	1	1	1	1	0	0	0	0	1	0	0	1	0	0	2	2	2	2	2	1	1	1	1	1	1	1	0	0
O75054;O75054-2	O75054;O75054-2	28;27	28;27	28;27	Immunoglobulin superfamily member 3	IGSF3	sp|O75054|IGSF3_HUMAN Immunoglobulin superfamily member 3 OS=Homo sapiens OX=9606 GN=IGSF3 PE=2 SV=3;sp|O75054-2|IGSF3_HUMAN Isoform 2 of Immunoglobulin superfamily member 3 OS=Homo sapiens OX=9606 GN=IGSF3	2	28	28	28	10	10	15	17	18	21	18	18	15	18	15	16	16	14	12	9	8	8	13	15	14	14	10	10	15	17	18	21	18	18	15	18	15	16	16	14	12	9
O75056	O75056	1	1	1	Syndecan-3	SDC3	sp|O75056|SDC3_HUMAN Syndecan-3 OS=Homo sapiens OX=9606 GN=SDC3 PE=1 SV=2	1	1	1	1	0	0	1	1	1	1	1	1	1	1	1	1	1	1	0	0	0	1	1	1	1	1	0	0	1	1	1	1	1	1	1	1	1	1	1	1	0	0
O75063	O75063	1	1	1	Glycosaminoglycan xylosylkinase	FAM20B	sp|O75063|XYLK_HUMAN Glycosaminoglycan xylosylkinase OS=Homo sapiens OX=9606 GN=FAM20B PE=1 SV=1	1	1	1	1	0	0	1	1	1	1	0	1	1	0	1	1	1	0	0	0	0	1	0	1	1	1	0	0	1	1	1	1	0	1	1	0	1	1	1	0	0	0
O75083;O75083-3	O75083;O75083-3	35;21	35;21	35;21	WD repeat-containing protein 1	WDR1	sp|O75083|WDR1_HUMAN WD repeat-containing protein 1 OS=Homo sapiens OX=9606 GN=WDR1 PE=1 SV=4;sp|O75083-3|WDR1_HUMAN Isoform 2 of WD repeat-containing protein 1 OS=Homo sapiens OX=9606 GN=WDR1	2	35	35	35	27	29	24	20	23	23	22	24	23	24	26	23	24	22	28	24	23	25	22	22	25	25	27	29	24	20	23	23	22	24	23	24	26	23	24	22	28	24
O75113	O75113	7	7	7	NEDD4-binding protein 1	N4BP1	sp|O75113|N4BP1_HUMAN NEDD4-binding protein 1 OS=Homo sapiens OX=9606 GN=N4BP1 PE=1 SV=4	1	7	7	7	4	1	5	5	6	5	5	4	5	5	4	3	4	3	1	1	0	2	4	5	2	1	4	1	5	5	6	5	5	4	5	5	4	3	4	3	1	1
O75116	O75116	27	27	22	Rho-associated protein kinase 2	ROCK2	sp|O75116|ROCK2_HUMAN Rho-associated protein kinase 2 OS=Homo sapiens OX=9606 GN=ROCK2 PE=1 SV=4	1	27	27	22	8	7	15	12	16	16	14	15	12	13	16	16	16	14	14	13	13	15	14	12	16	16	8	7	15	12	16	16	14	15	12	13	16	16	16	14	14	13
O75122;O75122-2	O75122	16;5	13;5	1;0	CLIP-associating protein 2	CLASP2	sp|O75122|CLAP2_HUMAN CLIP-associating protein 2 OS=Homo sapiens OX=9606 GN=CLASP2 PE=1 SV=3	2	16	13	1	5	3	9	7	8	9	8	8	7	8	6	9	9	8	7	7	8	7	9	9	9	8	3	1	7	5	6	7	6	6	5	6	4	7	7	6	5	5
O75122-3	O75122-3	16	1	1	CLIP-associating protein 2	CLASP2	sp|O75122-3|CLAP2_HUMAN Isoform 3 of CLIP-associating protein 2 OS=Homo sapiens OX=9606 GN=CLASP2	1	16	1	1	4	2	9	7	8	9	8	7	7	8	7	9	10	9	7	7	8	6	9	9	8	7	0	0	0	0	0	0	0	0	0	0	1	1	1	1	1	1
O75127	O75127	4	4	4	Pentatricopeptide repeat-containing protein 1, mitochondrial	PTCD1	sp|O75127|PTCD1_HUMAN Pentatricopeptide repeat-containing protein 1, mitochondrial OS=Homo sapiens OX=9606 GN=PTCD1 PE=1 SV=2	1	4	4	4	1	1	3	2	3	3	3	2	1	2	1	1	2	3	0	1	1	0	2	1	1	1	1	1	3	2	3	3	3	2	1	2	1	1	2	3	0	1
O75131;Q9HCH3-2;Q8IYJ1;Q96A23;O95741;Q96A23-2;Q9HCH3;O95741-2	O75131	16;1;1;1;1;1;1;1	16;1;1;1;1;1;1;1	15;0;0;0;0;0;0;0	Copine-3	CPNE3	sp|O75131|CPNE3_HUMAN Copine-3 OS=Homo sapiens OX=9606 GN=CPNE3 PE=1 SV=1	8	16	16	15	9	11	12	10	8	8	9	9	7	10	14	14	11	9	10	12	10	9	5	7	7	7	9	11	12	10	8	8	9	9	7	10	14	14	11	9	10	12
O75146;O75146-2	O75146;O75146-2	3;2	3;2	3;2	Huntingtin-interacting protein 1-related protein	HIP1R	sp|O75146|HIP1R_HUMAN Huntingtin-interacting protein 1-related protein OS=Homo sapiens OX=9606 GN=HIP1R PE=1 SV=2;sp|O75146-2|HIP1R_HUMAN Isoform 2 of Huntingtin-interacting protein 1-related protein OS=Homo sapiens OX=9606 GN=HIP1R	2	3	3	3	0	0	1	2	2	1	2	2	2	2	1	3	3	1	2	1	1	1	1	2	2	2	0	0	1	2	2	1	2	2	2	2	1	3	3	1	2	1
O75150;O75150-4;O75150-3	O75150;O75150-4;O75150-3	22;20;15	19;17;12	19;17;12	E3 ubiquitin-protein ligase BRE1B	RNF40	sp|O75150|BRE1B_HUMAN E3 ubiquitin-protein ligase BRE1B OS=Homo sapiens OX=9606 GN=RNF40 PE=1 SV=5;sp|O75150-4|BRE1B_HUMAN Isoform 4 of E3 ubiquitin-protein ligase BRE1B OS=Homo sapiens OX=9606 GN=RNF40;sp|O75150-3|BRE1B_HUMAN Isoform 3 of E3 ubiquitin-pro	3	22	19	19	10	8	12	14	14	15	17	15	15	12	15	13	16	14	13	8	6	6	13	13	11	14	7	6	10	12	12	13	15	13	13	10	13	12	14	12	10	7
O75152;A0A1B0GTU1	O75152	18;3	18;3	18;3	Zinc finger CCCH domain-containing protein 11A	ZC3H11A	sp|O75152|ZC11A_HUMAN Zinc finger CCCH domain-containing protein 11A OS=Homo sapiens OX=9606 GN=ZC3H11A PE=1 SV=3	2	18	18	18	4	4	6	5	9	9	7	6	8	6	9	8	7	7	8	4	7	7	7	7	7	10	4	4	6	5	9	9	7	6	8	6	9	8	7	7	8	4
O75153	O75153	37	37	37	Clustered mitochondria protein homolog	CLUH	sp|O75153|CLU_HUMAN Clustered mitochondria protein homolog OS=Homo sapiens OX=9606 GN=CLUH PE=1 SV=2	1	37	37	37	23	19	24	25	25	27	21	23	23	21	27	25	28	21	25	19	18	16	19	20	21	22	23	19	24	25	25	27	21	23	23	21	27	25	28	21	25	19
O75165	O75165	49	49	49	DnaJ homolog subfamily C member 13	DNAJC13	sp|O75165|DJC13_HUMAN DnaJ homolog subfamily C member 13 OS=Homo sapiens OX=9606 GN=DNAJC13 PE=1 SV=5	1	49	49	49	20	19	31	30	29	30	26	25	29	29	33	33	28	28	25	26	19	22	24	27	22	22	20	19	31	30	29	30	26	25	29	29	33	33	28	28	25	26
O75170-6;O75170-2;O75170-4;O75170-3;O75170-5;O75170	O75170-6;O75170-2;O75170-4;O75170-3;O75170-5;O75170	1;1;1;1;1;1	1;1;1;1;1;1	1;1;1;1;1;1	Serine/threonine-protein phosphatase 6 regulatory subunit 2	PPP6R2	sp|O75170-6|PP6R2_HUMAN Isoform 6 of Serine/threonine-protein phosphatase 6 regulatory subunit 2 OS=Homo sapiens OX=9606 GN=PPP6R2;sp|O75170-2|PP6R2_HUMAN Isoform 2 of Serine/threonine-protein phosphatase 6 regulatory subunit 2 OS=Homo sapiens OX=9606 GN=P	6	1	1	1	0	0	0	0	0	1	0	0	0	0	0	0	0	0	0	0	0	0	0	0	0	0	0	0	0	0	0	1	0	0	0	0	0	0	0	0	0	0
O75175	O75175	5	5	5	CCR4-NOT transcription complex subunit 3	CNOT3	sp|O75175|CNOT3_HUMAN CCR4-NOT transcription complex subunit 3 OS=Homo sapiens OX=9606 GN=CNOT3 PE=1 SV=1	1	5	5	5	3	2	3	2	3	3	3	2	3	3	3	3	3	4	3	3	2	4	2	2	3	3	3	2	3	2	3	3	3	2	3	3	3	3	3	4	3	3
O75177;O75177-2;O75177-4;O75177-3;O75177-5	O75177;O75177-2	5;4;1;1;1	5;4;1;1;1	5;4;1;1;1	Calcium-responsive transactivator	SS18L1	sp|O75177|CREST_HUMAN Calcium-responsive transactivator OS=Homo sapiens OX=9606 GN=SS18L1 PE=1 SV=2;sp|O75177-2|CREST_HUMAN Isoform 2 of Calcium-responsive transactivator OS=Homo sapiens OX=9606 GN=SS18L1	5	5	5	5	1	2	4	4	4	4	5	5	5	5	3	4	4	4	2	3	0	2	3	3	1	1	1	2	4	4	4	4	5	5	5	5	3	4	4	4	2	3
O75179-7;O75179-2;O75179;O75179-6;O75179-4;O75179-3;O75179-5	O75179-7;O75179-2;O75179;O75179-6;O75179-4;O75179-3	21;21;21;20;14;11;8	13;13;13;12;10;6;4	13;13;13;12;10;6;4	Ankyrin repeat domain-containing protein 17	ANKRD17	sp|O75179-7|ANR17_HUMAN Isoform 7 of Ankyrin repeat domain-containing protein 17 OS=Homo sapiens OX=9606 GN=ANKRD17;sp|O75179-2|ANR17_HUMAN Isoform 2 of Ankyrin repeat domain-containing protein 17 OS=Homo sapiens OX=9606 GN=ANKRD17;sp|O75179|ANR17_HUMAN An	7	21	13	13	8	7	15	15	15	14	14	17	13	14	13	12	15	13	11	9	9	10	12	11	11	11	2	2	8	10	10	9	9	10	10	9	7	6	10	9	5	3
O75182-3;O75182-2;O75182	O75182-3;O75182-2;O75182	1;1;1	1;1;1	1;1;1	Paired amphipathic helix protein Sin3b	SIN3B	sp|O75182-3|SIN3B_HUMAN Isoform 3 of Paired amphipathic helix protein Sin3b OS=Homo sapiens OX=9606 GN=SIN3B;sp|O75182-2|SIN3B_HUMAN Isoform 2 of Paired amphipathic helix protein Sin3b OS=Homo sapiens OX=9606 GN=SIN3B;sp|O75182|SIN3B_HUMAN Paired amphipath	3	1	1	1	0	0	1	0	1	1	1	1	1	1	1	1	0	1	0	0	0	0	0	0	0	1	0	0	1	0	1	1	1	1	1	1	1	1	0	1	0	0
O75190;O75190-4;O75190-3;Q8WWF6;O75190-2	O75190;O75190-4;O75190-3	4;3;3;1;1	4;3;3;1;1	4;3;3;1;1	DnaJ homolog subfamily B member 6	DNAJB6	sp|O75190|DNJB6_HUMAN DnaJ homolog subfamily B member 6 OS=Homo sapiens OX=9606 GN=DNAJB6 PE=1 SV=2;sp|O75190-4|DNJB6_HUMAN Isoform D of DnaJ homolog subfamily B member 6 OS=Homo sapiens OX=9606 GN=DNAJB6;sp|O75190-3|DNJB6_HUMAN Isoform C of DnaJ homolog s	5	4	4	4	1	1	2	2	2	2	2	2	2	2	1	2	2	2	2	1	3	3	2	3	2	2	1	1	2	2	2	2	2	2	2	2	1	2	2	2	2	1
O75191-2;O75191	O75191-2;O75191	5;5	5;5	5;5	Xylulose kinase	XYLB	sp|O75191-2|XYLB_HUMAN Isoform 2 of Xylulose kinase OS=Homo sapiens OX=9606 GN=XYLB;sp|O75191|XYLB_HUMAN Xylulose kinase OS=Homo sapiens OX=9606 GN=XYLB PE=1 SV=3	2	5	5	5	0	0	3	3	4	4	4	3	2	2	4	3	5	5	0	0	2	0	2	2	1	2	0	0	3	3	4	4	4	3	2	2	4	3	5	5	0	0
O75208;O75208-2	O75208	6;1	6;1	6;1	Ubiquinone biosynthesis protein COQ9, mitochondrial	COQ9	sp|O75208|COQ9_HUMAN Ubiquinone biosynthesis protein COQ9, mitochondrial OS=Homo sapiens OX=9606 GN=COQ9 PE=1 SV=1	2	6	6	6	4	3	2	3	2	3	3	3	3	3	5	5	3	3	4	4	3	5	3	3	6	5	4	3	2	3	2	3	3	3	3	3	5	5	3	3	4	4
O75223;O75223-3;O75223-2;O75223-4	O75223;O75223-3	14;7;4;4	14;7;4;4	14;7;4;4	Gamma-glutamylcyclotransferase	GGCT	sp|O75223|GGCT_HUMAN Gamma-glutamylcyclotransferase OS=Homo sapiens OX=9606 GN=GGCT PE=1 SV=1;sp|O75223-3|GGCT_HUMAN Isoform 3 of Gamma-glutamylcyclotransferase OS=Homo sapiens OX=9606 GN=GGCT	4	14	14	14	10	7	11	7	8	8	7	7	7	7	9	9	8	7	8	9	6	8	7	7	11	9	10	7	11	7	8	8	7	7	7	7	9	9	8	7	8	9
O75251;O75251-2	O75251;O75251-2	5;4	5;4	5;4	NADH dehydrogenase [ubiquinone] iron-sulfur protein 7, mitochondrial	NDUFS7	sp|O75251|NDUS7_HUMAN NADH dehydrogenase [ubiquinone] iron-sulfur protein 7, mitochondrial OS=Homo sapiens OX=9606 GN=NDUFS7 PE=1 SV=3;sp|O75251-2|NDUS7_HUMAN Isoform 2 of NADH dehydrogenase [ubiquinone] iron-sulfur protein 7, mitochondrial OS=Homo sapiens	2	5	5	5	2	2	2	2	3	3	4	4	2	3	3	2	1	1	2	2	2	1	0	1	3	4	2	2	2	2	3	3	4	4	2	3	3	2	1	1	2	2
O75306-2;O75306	O75306-2;O75306	16;16	16;16	16;16	NADH dehydrogenase [ubiquinone] iron-sulfur protein 2, mitochondrial	NDUFS2	sp|O75306-2|NDUS2_HUMAN Isoform 2 of NADH dehydrogenase [ubiquinone] iron-sulfur protein 2, mitochondrial OS=Homo sapiens OX=9606 GN=NDUFS2;sp|O75306|NDUS2_HUMAN NADH dehydrogenase [ubiquinone] iron-sulfur protein 2, mitochondrial OS=Homo sapiens OX=9606 G	2	16	16	16	9	8	13	11	11	12	10	12	11	11	12	11	12	12	12	11	12	10	11	10	11	12	9	8	13	11	11	12	10	12	11	11	12	11	12	12	12	11
O75312	O75312	14	14	14	Zinc finger protein ZPR1	ZPR1	sp|O75312|ZPR1_HUMAN Zinc finger protein ZPR1 OS=Homo sapiens OX=9606 GN=ZPR1 PE=1 SV=1	1	14	14	14	5	4	7	8	6	5	5	5	5	4	9	12	9	5	10	8	3	4	3	5	6	6	5	4	7	8	6	5	5	5	5	4	9	12	9	5	10	8
O75319;O75319-2	O75319;O75319-2	5;3	5;3	5;3	RNA/RNP complex-1-interacting phosphatase	DUSP11	sp|O75319|DUS11_HUMAN RNA/RNP complex-1-interacting phosphatase OS=Homo sapiens OX=9606 GN=DUSP11 PE=1 SV=2;sp|O75319-2|DUS11_HUMAN Isoform 2 of RNA/RNP complex-1-interacting phosphatase OS=Homo sapiens OX=9606 GN=DUSP11	2	5	5	5	1	0	1	1	1	1	1	1	1	1	0	1	1	3	2	1	1	2	2	1	1	1	1	0	1	1	1	1	1	1	1	1	0	1	1	3	2	1
O75323;O75323-2	O75323;O75323-2	11;6	11;6	11;6	Protein NipSnap homolog 2	GBAS	sp|O75323|NIPS2_HUMAN Protein NipSnap homolog 2 OS=Homo sapiens OX=9606 GN=NIPSNAP2 PE=1 SV=1;sp|O75323-2|NIPS2_HUMAN Isoform 2 of Protein NipSnap homolog 2 OS=Homo sapiens OX=9606 GN=NIPSNAP2	2	11	11	11	7	7	5	5	5	7	4	3	3	5	5	4	3	1	5	3	5	5	3	3	9	8	7	7	5	5	5	7	4	3	3	5	5	4	3	1	5	3
O75330-2;O75330;O75330-3;O75330-4	O75330-2;O75330;O75330-3;O75330-4	13;13;13;12	13;13;13;12	13;13;13;12	Hyaluronan mediated motility receptor	HMMR	sp|O75330-2|HMMR_HUMAN Isoform 2 of Hyaluronan mediated motility receptor OS=Homo sapiens OX=9606 GN=HMMR;sp|O75330|HMMR_HUMAN Hyaluronan mediated motility receptor OS=Homo sapiens OX=9606 GN=HMMR PE=1 SV=2;sp|O75330-3|HMMR_HUMAN Isoform 3 of Hyaluronan me	4	13	13	13	5	5	10	8	10	6	6	8	6	7	9	10	8	7	5	6	1	5	5	10	9	10	5	5	10	8	10	6	6	8	6	7	9	10	8	7	5	6
O75340;O75340-2;O75340-3	O75340;O75340-2	9;8;2	9;8;2	9;8;2	Programmed cell death protein 6	PDCD6	sp|O75340|PDCD6_HUMAN Programmed cell death protein 6 OS=Homo sapiens OX=9606 GN=PDCD6 PE=1 SV=1;sp|O75340-2|PDCD6_HUMAN Isoform 2 of Programmed cell death protein 6 OS=Homo sapiens OX=9606 GN=PDCD6	3	9	9	9	6	7	6	5	7	7	7	7	5	5	7	8	5	6	7	7	6	5	6	5	8	8	6	7	6	5	7	7	7	7	5	5	7	8	5	6	7	7
O75347;O75347-2	O75347;O75347-2	13;9	13;9	13;9	Tubulin-specific chaperone A	TBCA	sp|O75347|TBCA_HUMAN Tubulin-specific chaperone A OS=Homo sapiens OX=9606 GN=TBCA PE=1 SV=3;sp|O75347-2|TBCA_HUMAN Isoform 2 of Tubulin-specific chaperone A OS=Homo sapiens OX=9606 GN=TBCA	2	13	13	13	11	10	10	11	9	10	9	10	10	9	11	10	12	9	12	10	10	11	9	9	11	8	11	10	10	11	9	10	9	10	10	9	11	10	12	9	12	10
O75348;O95670-2;O95670	O75348	9;3;3	9;3;3	8;2;2	V-type proton ATPase subunit G 1	ATP6V1G1	sp|O75348|VATG1_HUMAN V-type proton ATPase subunit G 1 OS=Homo sapiens OX=9606 GN=ATP6V1G1 PE=1 SV=3	3	9	9	8	7	8	7	7	6	6	5	4	6	7	6	6	5	6	6	7	4	6	5	6	6	7	7	8	7	7	6	6	5	4	6	7	6	6	5	6	6	7
O75351	O75351	18	18	13	Vacuolar protein sorting-associated protein 4B	VPS4B	sp|O75351|VPS4B_HUMAN Vacuolar protein sorting-associated protein 4B OS=Homo sapiens OX=9606 GN=VPS4B PE=1 SV=2	1	18	18	13	14	11	12	11	12	11	12	11	13	10	13	12	12	11	11	10	10	10	11	11	12	12	14	11	12	11	12	11	12	11	13	10	13	12	12	11	11	10
O75352-2;O75352	O75352-2;O75352	2;2	2;2	2;2	Mannose-P-dolichol utilization defect 1 protein	MPDU1	sp|O75352-2|MPU1_HUMAN Isoform 2 of Mannose-P-dolichol utilization defect 1 protein OS=Homo sapiens OX=9606 GN=MPDU1;sp|O75352|MPU1_HUMAN Mannose-P-dolichol utilization defect 1 protein OS=Homo sapiens OX=9606 GN=MPDU1 PE=1 SV=2	2	2	2	2	2	2	2	2	2	2	2	2	2	2	2	2	2	2	2	2	2	2	2	2	1	1	2	2	2	2	2	2	2	2	2	2	2	2	2	2	2	2
O75354-2;O75354-3;O75354	O75354-2;O75354-3;O75354	2;2;2	2;2;2	2;2;2	Ectonucleoside triphosphate diphosphohydrolase 6	ENTPD6	sp|O75354-2|ENTP6_HUMAN Isoform 2 of Ectonucleoside triphosphate diphosphohydrolase 6 OS=Homo sapiens OX=9606 GN=ENTPD6;sp|O75354-3|ENTP6_HUMAN Isoform 3 of Ectonucleoside triphosphate diphosphohydrolase 6 OS=Homo sapiens OX=9606 GN=ENTPD6;sp|O75354|ENTP6_	3	2	2	2	1	1	2	0	2	1	0	1	1	1	2	2	1	1	1	1	0	0	0	2	1	2	1	1	2	0	2	1	0	1	1	1	2	2	1	1	1	1
O75363;O75363-2	O75363;O75363-2	2;2	2;2	2;2	Breast carcinoma-amplified sequence 1	BCAS1	sp|O75363|BCAS1_HUMAN Breast carcinoma-amplified sequence 1 OS=Homo sapiens OX=9606 GN=BCAS1 PE=1 SV=2;sp|O75363-2|BCAS1_HUMAN Isoform 2 of Breast carcinoma-amplified sequence 1 OS=Homo sapiens OX=9606 GN=BCAS1	2	2	2	2	1	0	1	1	1	1	1	1	1	1	1	1	1	1	0	1	1	1	2	2	1	1	1	0	1	1	1	1	1	1	1	1	1	1	1	1	0	1
O75367-2;O75367-3;O75367	O75367-2;O75367-3;O75367	17;17;17	17;17;17	15;15;15	Core histone macro-H2A.1	H2AFY	sp|O75367-2|H2AY_HUMAN Isoform 1 of Core histone macro-H2A.1 OS=Homo sapiens OX=9606 GN=MACROH2A1;sp|O75367-3|H2AY_HUMAN Isoform 3 of Core histone macro-H2A.1 OS=Homo sapiens OX=9606 GN=MACROH2A1;sp|O75367|H2AY_HUMAN Core histone macro-H2A.1 OS=Homo sapien	3	17	17	15	12	11	12	14	12	12	10	11	11	12	13	14	12	13	14	11	12	15	13	11	11	13	12	11	12	14	12	12	10	11	11	12	13	14	12	13	14	11
O75368	O75368	4	4	4	SH3 domain-binding glutamic acid-rich-like protein	SH3BGRL	sp|O75368|SH3L1_HUMAN SH3 domain-binding glutamic acid-rich-like protein OS=Homo sapiens OX=9606 GN=SH3BGRL PE=1 SV=1	1	4	4	4	2	1	3	2	3	3	3	3	3	3	3	3	2	2	2	2	2	3	3	3	4	4	2	1	3	2	3	3	3	3	3	3	3	3	2	2	2	2
O75369-8;O75369-2;O75369-9;O75369;O75369-6;O75369-3;O75369-7;O75369-5;O75369-4	O75369-8;O75369-2;O75369-9;O75369;O75369-6;O75369-3;O75369-7;O75369-5;O75369-4	80;79;79;79;78;78;69;64;64	75;74;74;74;73;73;69;59;59	73;72;72;72;71;71;68;57;57	Filamin-B	FLNB	sp|O75369-8|FLNB_HUMAN Isoform 8 of Filamin-B OS=Homo sapiens OX=9606 GN=FLNB;sp|O75369-2|FLNB_HUMAN Isoform 2 of Filamin-B OS=Homo sapiens OX=9606 GN=FLNB;sp|O75369-9|FLNB_HUMAN Isoform 9 of Filamin-B OS=Homo sapiens OX=9606 GN=FLNB;sp|O75369|FLNB_HUMAN F	9	80	75	73	43	38	50	48	42	43	48	45	45	39	53	52	50	43	54	49	43	47	40	39	43	38	39	34	46	45	39	40	45	42	42	36	50	49	47	40	50	45
O75376;O75376-2;O75376-3	O75376;O75376-2	7;7;3	7;7;3	7;7;3	Nuclear receptor corepressor 1	NCOR1	sp|O75376|NCOR1_HUMAN Nuclear receptor corepressor 1 OS=Homo sapiens OX=9606 GN=NCOR1 PE=1 SV=2;sp|O75376-2|NCOR1_HUMAN Isoform 2 of Nuclear receptor corepressor 1 OS=Homo sapiens OX=9606 GN=NCOR1	3	7	7	7	3	4	3	3	3	3	4	4	4	4	3	3	4	2	2	3	1	2	3	3	3	3	3	4	3	3	3	3	4	4	4	4	3	3	4	2	2	3
O75380	O75380	7	7	7	NADH dehydrogenase [ubiquinone] iron-sulfur protein 6, mitochondrial	NDUFS6	sp|O75380|NDUS6_HUMAN NADH dehydrogenase [ubiquinone] iron-sulfur protein 6, mitochondrial OS=Homo sapiens OX=9606 GN=NDUFS6 PE=1 SV=1	1	7	7	7	4	5	5	4	5	4	6	6	4	4	5	6	3	4	5	5	5	5	3	3	5	5	4	5	5	4	5	4	6	6	4	4	5	6	3	4	5	5
O75381-2;O75381	O75381-2;O75381	7;7	7;7	7;7	Peroxisomal membrane protein PEX14	PEX14	sp|O75381-2|PEX14_HUMAN Isoform 2 of Peroxisomal membrane protein PEX14 OS=Homo sapiens OX=9606 GN=PEX14;sp|O75381|PEX14_HUMAN Peroxisomal membrane protein PEX14 OS=Homo sapiens OX=9606 GN=PEX14 PE=1 SV=1	2	7	7	7	1	2	1	2	3	2	2	2	4	1	3	5	3	2	5	2	2	3	2	3	3	3	1	2	1	2	3	2	2	2	4	1	3	5	3	2	5	2
O75390	O75390	25	25	25	Citrate synthase, mitochondrial	CS	sp|O75390|CISY_HUMAN Citrate synthase, mitochondrial OS=Homo sapiens OX=9606 GN=CS PE=1 SV=2	1	25	25	25	12	15	12	10	13	12	13	12	11	9	14	14	12	14	15	14	15	13	10	10	15	14	12	15	12	10	13	12	13	12	11	9	14	14	12	14	15	14
O75391	O75391	3	3	3	Sperm-associated antigen 7	SPAG7	sp|O75391|SPAG7_HUMAN Sperm-associated antigen 7 OS=Homo sapiens OX=9606 GN=SPAG7 PE=1 SV=2	1	3	3	3	1	1	1	2	3	1	2	0	2	1	2	2	2	2	2	2	2	2	2	1	2	2	1	1	1	2	3	1	2	0	2	1	2	2	2	2	2	2
O75394	O75394	3	3	3	39S ribosomal protein L33, mitochondrial	MRPL33	sp|O75394|RM33_HUMAN 39S ribosomal protein L33, mitochondrial OS=Homo sapiens OX=9606 GN=MRPL33 PE=1 SV=1	1	3	3	3	1	1	1	3	3	3	2	3	3	3	3	3	3	2	2	1	1	1	2	3	2	1	1	1	1	3	3	3	2	3	3	3	3	3	3	2	2	1
O75396	O75396	11	11	11	Vesicle-trafficking protein SEC22b	SEC22B	sp|O75396|SC22B_HUMAN Vesicle-trafficking protein SEC22b OS=Homo sapiens OX=9606 GN=SEC22B PE=1 SV=4	1	11	11	11	7	9	8	7	8	7	5	5	4	5	8	8	8	8	9	9	7	8	4	4	6	7	7	9	8	7	8	7	5	5	4	5	8	8	8	8	9	9
O75400-2;O75400;O75400-3;O75400-5	O75400-2;O75400;O75400-3	20;19;17;1	20;19;17;1	20;19;17;1	Pre-mRNA-processing factor 40 homolog A	PRPF40A	sp|O75400-2|PR40A_HUMAN Isoform 2 of Pre-mRNA-processing factor 40 homolog A OS=Homo sapiens OX=9606 GN=PRPF40A;sp|O75400|PR40A_HUMAN Pre-mRNA-processing factor 40 homolog A OS=Homo sapiens OX=9606 GN=PRPF40A PE=1 SV=2;sp|O75400-3|PR40A_HUMAN Isoform 3 of	4	20	20	20	10	9	10	10	10	11	10	10	10	9	10	11	9	10	9	10	10	10	12	12	14	12	10	9	10	10	10	11	10	10	10	9	10	11	9	10	9	10
O75410-9;O75410;O75410-2;O75410-7;O75410-3;O75410-10;O75410-6;O75410-5;O75410-4;O75410-8;O95359-2	O75410-9;O75410;O75410-2;O75410-7;O75410-3;O75410-10;O75410-6;O75410-5;O75410-4	16;16;16;15;11;9;9;8;8;5;1	16;16;16;15;11;9;9;8;8;5;1	15;15;15;14;10;8;8;7;7;5;0	Transforming acidic coiled-coil-containing protein 1	TACC1	sp|O75410-9|TACC1_HUMAN Isoform 9 of Transforming acidic coiled-coil-containing protein 1 OS=Homo sapiens OX=9606 GN=TACC1;sp|O75410|TACC1_HUMAN Transforming acidic coiled-coil-containing protein 1 OS=Homo sapiens OX=9606 GN=TACC1 PE=1 SV=2;sp|O75410-2|TAC	11	16	16	15	8	7	12	11	12	12	12	11	12	13	11	11	10	10	11	11	7	10	9	11	9	10	8	7	12	11	12	12	12	11	12	13	11	11	10	10	11	11
O75414-2;O75414	O75414-2;O75414	1;1	1;1	1;1	Nucleoside diphosphate kinase 6	NME6	sp|O75414-2|NDK6_HUMAN Isoform 2 of Nucleoside diphosphate kinase 6 OS=Homo sapiens OX=9606 GN=NME6;sp|O75414|NDK6_HUMAN Nucleoside diphosphate kinase 6 OS=Homo sapiens OX=9606 GN=NME6 PE=1 SV=3	2	1	1	1	0	0	0	0	0	0	1	0	0	0	1	1	0	0	0	0	0	0	0	0	0	0	0	0	0	0	0	0	1	0	0	0	1	1	0	0	0	0
O75420	O75420	2	2	2	PERQ amino acid-rich with GYF domain-containing protein 1	GIGYF1	sp|O75420|GGYF1_HUMAN GRB10-interacting GYF protein 1 OS=Homo sapiens OX=9606 GN=GIGYF1 PE=1 SV=2	1	2	2	2	1	1	0	0	0	0	0	0	0	0	2	2	1	1	0	0	0	0	0	0	1	1	1	1	0	0	0	0	0	0	0	0	2	2	1	1	0	0
O75427	O75427	10	10	9	Leucine-rich repeat and calponin homology domain-containing protein 4	LRCH4	sp|O75427|LRCH4_HUMAN Leucine-rich repeat and calponin homology domain-containing protein 4 OS=Homo sapiens OX=9606 GN=LRCH4 PE=1 SV=2	1	10	10	9	3	2	5	6	8	8	7	8	5	6	6	6	7	6	2	2	4	3	5	5	2	4	3	2	5	6	8	8	7	8	5	6	6	6	7	6	2	2
O75431-2;O75431	O75431-2;O75431	11;11	11;11	11;11	Metaxin-2	MTX2	sp|O75431-2|MTX2_HUMAN Isoform 2 of Metaxin-2 OS=Homo sapiens OX=9606 GN=MTX2;sp|O75431|MTX2_HUMAN Metaxin-2 OS=Homo sapiens OX=9606 GN=MTX2 PE=1 SV=1	2	11	11	11	5	5	9	9	9	10	9	8	7	7	10	9	8	6	8	4	5	5	8	8	8	7	5	5	9	9	9	10	9	8	7	7	10	9	8	6	8	4
O75436	O75436	13	13	7	Vacuolar protein sorting-associated protein 26A	VPS26A	sp|O75436|VP26A_HUMAN Vacuolar protein sorting-associated protein 26A OS=Homo sapiens OX=9606 GN=VPS26A PE=1 SV=2	1	13	13	7	8	6	7	6	6	6	7	5	7	8	9	10	7	6	11	11	11	9	7	6	10	10	8	6	7	6	6	6	7	5	7	8	9	10	7	6	11	11
O75438;O75438-2	O75438	3;1	3;1	3;1	NADH dehydrogenase [ubiquinone] 1 beta subcomplex subunit 1	NDUFB1	sp|O75438|NDUB1_HUMAN NADH dehydrogenase [ubiquinone] 1 beta subcomplex subunit 1 OS=Homo sapiens OX=9606 GN=NDUFB1 PE=1 SV=1	2	3	3	3	3	3	2	1	1	1	2	2	1	1	3	2	1	1	3	3	3	3	2	1	2	2	3	3	2	1	1	1	2	2	1	1	3	2	1	1	3	3
O75439	O75439	16	16	16	Mitochondrial-processing peptidase subunit beta	PMPCB	sp|O75439|MPPB_HUMAN Mitochondrial-processing peptidase subunit beta OS=Homo sapiens OX=9606 GN=PMPCB PE=1 SV=2	1	16	16	16	6	7	10	9	10	11	8	8	6	7	9	8	9	9	7	8	10	11	7	8	11	11	6	7	10	9	10	11	8	8	6	7	9	8	9	9	7	8
O75446	O75446	3	3	3	Histone deacetylase complex subunit SAP30	SAP30	sp|O75446|SAP30_HUMAN Histone deacetylase complex subunit SAP30 OS=Homo sapiens OX=9606 GN=SAP30 PE=1 SV=1	1	3	3	3	2	2	2	3	2	2	2	2	2	3	2	2	2	2	2	3	3	2	2	2	2	2	2	2	2	3	2	2	2	2	2	3	2	2	2	2	2	3
O75448-2;O75448	O75448-2;O75448	3;3	3;3	3;3	Mediator of RNA polymerase II transcription subunit 24	MED24	sp|O75448-2|MED24_HUMAN Isoform 2 of Mediator of RNA polymerase II transcription subunit 24 OS=Homo sapiens OX=9606 GN=MED24;sp|O75448|MED24_HUMAN Mediator of RNA polymerase II transcription subunit 24 OS=Homo sapiens OX=9606 GN=MED24 PE=1 SV=1	2	3	3	3	0	0	1	0	1	1	0	1	0	0	2	1	2	2	0	1	0	0	0	0	1	1	0	0	1	0	1	1	0	1	0	0	2	1	2	2	0	1
O75475;O75475-3;O75475-2	O75475;O75475-3;O75475-2	19;12;12	19;12;12	17;10;10	PC4 and SFRS1-interacting protein	PSIP1	sp|O75475|PSIP1_HUMAN PC4 and SFRS1-interacting protein OS=Homo sapiens OX=9606 GN=PSIP1 PE=1 SV=1;sp|O75475-3|PSIP1_HUMAN Isoform 3 of PC4 and SFRS1-interacting protein OS=Homo sapiens OX=9606 GN=PSIP1;sp|O75475-2|PSIP1_HUMAN Isoform 2 of PC4 and SFRS1-in	3	19	19	17	10	9	11	12	14	14	10	12	12	11	12	13	11	9	12	9	8	11	14	14	13	11	10	9	11	12	14	14	10	12	12	11	12	13	11	9	12	9
O75477	O75477	13	10	10	Erlin-1	ERLIN1	sp|O75477|ERLN1_HUMAN Erlin-1 OS=Homo sapiens OX=9606 GN=ERLIN1 PE=1 SV=2	1	13	10	10	7	5	6	8	8	8	7	7	7	8	10	9	7	6	7	8	8	9	10	9	8	7	5	4	5	7	7	7	5	6	5	7	7	7	6	5	5	6
O75489;O75489-2	O75489	16;3	16;3	16;3	NADH dehydrogenase [ubiquinone] iron-sulfur protein 3, mitochondrial	NDUFS3	sp|O75489|NDUS3_HUMAN NADH dehydrogenase [ubiquinone] iron-sulfur protein 3, mitochondrial OS=Homo sapiens OX=9606 GN=NDUFS3 PE=1 SV=1	2	16	16	16	13	12	11	14	12	14	13	13	12	13	13	13	13	12	12	12	11	12	12	13	14	14	13	12	11	14	12	14	13	13	12	13	13	13	13	12	12	12
O75494-5;O75494-4;O75494-6;O75494-3;O75494-2;O75494;Q8WXF0	O75494-5;O75494-4;O75494-6;O75494-3;O75494-2;O75494	12;12;12;12;12;12;2	12;12;12;12;12;12;2	12;12;12;12;12;12;2	Serine/arginine-rich splicing factor 10	SRSF10	sp|O75494-5|SRS10_HUMAN Isoform 5 of Serine/arginine-rich splicing factor 10 OS=Homo sapiens OX=9606 GN=SRSF10;sp|O75494-4|SRS10_HUMAN Isoform 4 of Serine/arginine-rich splicing factor 10 OS=Homo sapiens OX=9606 GN=SRSF10;sp|O75494-6|SRS10_HUMAN Isoform 6	7	12	12	12	7	7	9	9	9	9	7	9	9	10	7	8	8	10	7	8	8	7	7	8	8	8	7	7	9	9	9	9	7	9	9	10	7	8	8	10	7	8
O75496	O75496	1	1	1	Geminin	GMNN	sp|O75496|GEMI_HUMAN Geminin OS=Homo sapiens OX=9606 GN=GMNN PE=1 SV=1	1	1	1	1	0	0	0	0	0	0	1	1	0	0	0	0	0	0	0	0	1	1	1	1	0	0	0	0	0	0	0	0	1	1	0	0	0	0	0	0	0	0
O75503	O75503	2	2	2	Ceroid-lipofuscinosis neuronal protein 5	CLN5	sp|O75503|CLN5_HUMAN Ceroid-lipofuscinosis neuronal protein 5 OS=Homo sapiens OX=9606 GN=CLN5 PE=1 SV=2	1	2	2	2	1	0	1	1	0	0	1	0	0	0	1	1	1	1	1	0	1	0	0	0	0	0	1	0	1	1	0	0	1	0	0	0	1	1	1	1	1	0
O75506	O75506	3	3	3	Heat shock factor-binding protein 1	HSBP1	sp|O75506|HSBP1_HUMAN Heat shock factor-binding protein 1 OS=Homo sapiens OX=9606 GN=HSBP1 PE=1 SV=1	1	3	3	3	1	1	1	2	1	1	1	1	1	1	3	3	2	2	3	3	2	2	1	1	2	2	1	1	1	2	1	1	1	1	1	1	3	3	2	2	3	3
O75521-2;O75521	O75521-2;O75521	15;15	15;15	15;15	Enoyl-CoA delta isomerase 2, mitochondrial	ECI2	sp|O75521-2|ECI2_HUMAN Isoform 2 of Enoyl-CoA delta isomerase 2 OS=Homo sapiens OX=9606 GN=ECI2;sp|O75521|ECI2_HUMAN Enoyl-CoA delta isomerase 2 OS=Homo sapiens OX=9606 GN=ECI2 PE=1 SV=4	2	15	15	15	7	8	9	7	9	9	10	10	9	8	9	10	9	7	7	8	13	9	10	8	9	9	7	8	9	7	9	9	10	10	9	8	9	10	9	7	7	8
O75525-2;O75525	O75525-2;O75525	1;1	1;1	1;1	KH domain-containing, RNA-binding, signal transduction-associated protein 3	KHDRBS3	sp|O75525-2|KHDR3_HUMAN Isoform 2 of KH domain-containing, RNA-binding, signal transduction-associated protein 3 OS=Homo sapiens OX=9606 GN=KHDRBS3;sp|O75525|KHDR3_HUMAN KH domain-containing, RNA-binding, signal transduction-associated protein 3 OS=Homo sa	2	1	1	1	1	1	1	1	1	1	1	1	1	1	1	1	1	1	1	1	0	0	1	0	1	1	1	1	1	1	1	1	1	1	1	1	1	1	1	1	1	1
O75528-2;O75528	O75528-2;O75528	2;2	2;2	2;2	Transcriptional adapter 3	TADA3	sp|O75528-2|TADA3_HUMAN Isoform 2 of Transcriptional adapter 3 OS=Homo sapiens OX=9606 GN=TADA3;sp|O75528|TADA3_HUMAN Transcriptional adapter 3 OS=Homo sapiens OX=9606 GN=TADA3 PE=1 SV=1	2	2	2	2	0	0	0	0	2	2	2	2	1	2	2	1	2	2	1	0	0	0	1	1	1	1	0	0	0	0	2	2	2	2	1	2	2	1	2	2	1	0
O75530-3;O75530;O75530-2	O75530-3;O75530;O75530-2	9;9;8	9;9;8	8;8;7	Polycomb protein EED	EED	sp|O75530-3|EED_HUMAN Isoform 3 of Polycomb protein EED OS=Homo sapiens OX=9606 GN=EED;sp|O75530|EED_HUMAN Polycomb protein EED OS=Homo sapiens OX=9606 GN=EED PE=1 SV=2;sp|O75530-2|EED_HUMAN Isoform 2 of Polycomb protein EED OS=Homo sapiens OX=9606 GN=EED	3	9	9	8	3	4	6	6	5	6	6	5	5	5	5	6	7	5	5	3	2	1	5	5	3	4	3	4	6	6	5	6	6	5	5	5	5	6	7	5	5	3
O75531	O75531	14	14	14	Barrier-to-autointegration factor;Barrier-to-autointegration factor, N-terminally processed	BANF1	sp|O75531|BAF_HUMAN Barrier-to-autointegration factor OS=Homo sapiens OX=9606 GN=BANF1 PE=1 SV=1	1	14	14	14	11	12	11	10	10	9	7	8	8	7	10	10	8	7	11	11	8	8	9	9	10	10	11	12	11	10	10	9	7	8	8	7	10	10	8	7	11	11
O75533;O75533-2	O75533	73;6	73;6	73;6	Splicing factor 3B subunit 1	SF3B1	sp|O75533|SF3B1_HUMAN Splicing factor 3B subunit 1 OS=Homo sapiens OX=9606 GN=SF3B1 PE=1 SV=3	2	73	73	73	41	37	48	44	48	46	45	40	37	42	54	47	45	45	44	40	36	45	41	41	52	48	41	37	48	44	48	46	45	40	37	42	54	47	45	45	44	40
O75534;O75534-2;O75534-4;O75534-3	O75534;O75534-2;O75534-4;O75534-3	38;36;36;34	38;36;36;34	38;36;36;34	Cold shock domain-containing protein E1	CSDE1	sp|O75534|CSDE1_HUMAN Cold shock domain-containing protein E1 OS=Homo sapiens OX=9606 GN=CSDE1 PE=1 SV=2;sp|O75534-2|CSDE1_HUMAN Isoform 2 of Cold shock domain-containing protein E1 OS=Homo sapiens OX=9606 GN=CSDE1;sp|O75534-4|CSDE1_HUMAN Isoform 4 of Cold	4	38	38	38	27	23	26	24	22	22	20	23	23	20	29	27	24	25	29	21	25	26	22	22	27	24	27	23	26	24	22	22	20	23	23	20	29	27	24	25	29	21
O75554;O75554-2	O75554;O75554-2	4;3	4;3	4;3	WW domain-binding protein 4	WBP4	sp|O75554|WBP4_HUMAN WW domain-binding protein 4 OS=Homo sapiens OX=9606 GN=WBP4 PE=1 SV=1;sp|O75554-2|WBP4_HUMAN Isoform 2 of WW domain-binding protein 4 OS=Homo sapiens OX=9606 GN=WBP4	2	4	4	4	3	1	3	3	3	3	2	3	3	2	2	3	2	2	2	2	1	2	3	2	4	2	3	1	3	3	3	3	2	3	3	2	2	3	2	2	2	2
O75558	O75558	4	4	4	Syntaxin-11	STX11	sp|O75558|STX11_HUMAN Syntaxin-11 OS=Homo sapiens OX=9606 GN=STX11 PE=1 SV=1	1	4	4	4	1	0	2	2	2	2	2	2	2	2	1	1	2	2	1	1	0	2	3	3	1	2	1	0	2	2	2	2	2	2	2	2	1	1	2	2	1	1
O75569;O75569-3;O75569-2	O75569;O75569-3;O75569-2	15;14;14	15;14;14	15;14;14	Interferon-inducible double-stranded RNA-dependent protein kinase activator A	PRKRA	sp|O75569|PRKRA_HUMAN Interferon-inducible double-stranded RNA-dependent protein kinase activator A OS=Homo sapiens OX=9606 GN=PRKRA PE=1 SV=1;sp|O75569-3|PRKRA_HUMAN Isoform 3 of Interferon-inducible double-stranded RNA-dependent protein kinase activator	3	15	15	15	8	6	10	10	10	9	10	11	9	11	8	8	10	13	6	6	9	5	7	9	8	8	8	6	10	10	10	9	10	11	9	11	8	8	10	13	6	6
O75582;O75582-3;O75582-2	O75582;O75582-3;O75582-2	8;8;5	8;8;5	7;7;5	Ribosomal protein S6 kinase alpha-5	RPS6KA5	sp|O75582|KS6A5_HUMAN Ribosomal protein S6 kinase alpha-5 OS=Homo sapiens OX=9606 GN=RPS6KA5 PE=1 SV=1;sp|O75582-3|KS6A5_HUMAN Isoform 3 of Ribosomal protein S6 kinase alpha-5 OS=Homo sapiens OX=9606 GN=RPS6KA5;sp|O75582-2|KS6A5_HUMAN Isoform 2 of Ribosoma	3	8	8	7	4	4	5	4	5	4	4	4	5	3	5	5	3	2	6	5	1	0	4	2	4	5	4	4	5	4	5	4	4	4	5	3	5	5	3	2	6	5
O75592-2;O75592	O75592-2;O75592	12;12	12;12	12;12	E3 ubiquitin-protein ligase MYCBP2	MYCBP2	sp|O75592-2|MYCB2_HUMAN Isoform 2 of E3 ubiquitin-protein ligase MYCBP2 OS=Homo sapiens OX=9606 GN=MYCBP2;sp|O75592|MYCB2_HUMAN E3 ubiquitin-protein ligase MYCBP2 OS=Homo sapiens OX=9606 GN=MYCBP2 PE=1 SV=4	2	12	12	12	1	3	7	4	5	5	6	5	6	7	7	6	5	7	3	2	1	3	4	6	6	6	1	3	7	4	5	5	6	5	6	7	7	6	5	7	3	2
O75600;O75600-2	O75600;O75600-2	4;4	4;4	4;4	2-amino-3-ketobutyrate coenzyme A ligase, mitochondrial	GCAT	sp|O75600|KBL_HUMAN 2-amino-3-ketobutyrate coenzyme A ligase, mitochondrial OS=Homo sapiens OX=9606 GN=GCAT PE=1 SV=1;sp|O75600-2|KBL_HUMAN Isoform 2 of 2-amino-3-ketobutyrate coenzyme A ligase, mitochondrial OS=Homo sapiens OX=9606 GN=GCAT	2	4	4	4	1	2	2	2	2	1	2	0	1	1	2	3	1	1	1	2	1	3	2	1	1	2	1	2	2	2	2	1	2	0	1	1	2	3	1	1	1	2
O75607	O75607	5	5	5	Nucleoplasmin-3	NPM3	sp|O75607|NPM3_HUMAN Nucleoplasmin-3 OS=Homo sapiens OX=9606 GN=NPM3 PE=1 SV=3	1	5	5	5	5	5	5	5	5	5	5	5	4	5	5	5	5	5	5	5	5	4	5	5	5	5	5	5	5	5	5	5	5	5	4	5	5	5	5	5	5	5
O75608;O75608-2	O75608;O75608-2	12;11	12;11	12;11	Acyl-protein thioesterase 1	LYPLA1	sp|O75608|LYPA1_HUMAN Acyl-protein thioesterase 1 OS=Homo sapiens OX=9606 GN=LYPLA1 PE=1 SV=1;sp|O75608-2|LYPA1_HUMAN Isoform 2 of Acyl-protein thioesterase 1 OS=Homo sapiens OX=9606 GN=LYPLA1	2	12	12	12	6	6	6	5	5	5	4	5	4	5	6	7	7	8	7	6	4	4	4	3	5	6	6	6	6	5	5	5	4	5	4	5	6	7	7	8	7	6
O75616;O75616-2	O75616	4;1	4;1	4;1	GTPase Era, mitochondrial	ERAL1	sp|O75616|ERAL1_HUMAN GTPase Era, mitochondrial OS=Homo sapiens OX=9606 GN=ERAL1 PE=1 SV=2	2	4	4	4	1	1	2	3	4	4	2	4	4	4	1	1	1	2	0	0	1	1	4	4	1	1	1	1	2	3	4	4	2	4	4	4	1	1	1	2	0	0
O75629	O75629	1	1	1	Protein CREG1	CREG1	sp|O75629|CREG1_HUMAN Protein CREG1 OS=Homo sapiens OX=9606 GN=CREG1 PE=1 SV=1	1	1	1	1	1	1	1	1	1	1	1	1	1	1	1	1	1	1	1	1	1	1	1	1	1	1	1	1	1	1	1	1	1	1	1	1	1	1	1	1	1	1
O75643;O75643-2	O75643	101;31	101;31	101;31	U5 small nuclear ribonucleoprotein 200 kDa helicase	SNRNP200	sp|O75643|U520_HUMAN U5 small nuclear ribonucleoprotein 200 kDa helicase OS=Homo sapiens OX=9606 GN=SNRNP200 PE=1 SV=2	2	101	101	101	60	56	62	68	58	59	58	61	58	58	71	74	63	60	65	66	63	72	59	65	66	63	60	56	62	68	58	59	58	61	58	58	71	74	63	60	65	66
O75663;O75663-2	O75663;O75663-2	19;15	19;15	19;15	TIP41-like protein	TIPRL	sp|O75663|TIPRL_HUMAN TIP41-like protein OS=Homo sapiens OX=9606 GN=TIPRL PE=1 SV=2;sp|O75663-2|TIPRL_HUMAN Isoform 2 of TIP41-like protein OS=Homo sapiens OX=9606 GN=TIPRL	2	19	19	19	12	11	10	17	15	15	14	13	12	13	15	15	12	12	12	12	9	9	12	11	12	12	12	11	10	17	15	15	14	13	12	13	15	15	12	12	12	12
O75674-2;O75674;O75674-3	O75674-2;O75674;O75674-3	5;5;3	5;5;3	5;5;3	TOM1-like protein 1	TOM1L1	sp|O75674-2|TM1L1_HUMAN Isoform 2 of TOM1-like protein 1 OS=Homo sapiens OX=9606 GN=TOM1L1;sp|O75674|TM1L1_HUMAN TOM1-like protein 1 OS=Homo sapiens OX=9606 GN=TOM1L1 PE=1 SV=2;sp|O75674-3|TM1L1_HUMAN Isoform 3 of TOM1-like protein 1 OS=Homo sapiens OX=960	3	5	5	5	0	0	2	2	3	2	2	2	2	2	2	2	2	3	0	1	1	0	2	2	3	3	0	0	2	2	3	2	2	2	2	2	2	2	2	3	0	1
O75683	O75683	5	5	5	Surfeit locus protein 6	SURF6	sp|O75683|SURF6_HUMAN Surfeit locus protein 6 OS=Homo sapiens OX=9606 GN=SURF6 PE=1 SV=3	1	5	5	5	1	2	1	2	2	2	2	2	2	2	2	1	1	1	2	2	2	1	2	2	1	1	1	2	1	2	2	2	2	2	2	2	2	1	1	1	2	2
O75688;O75688-5;O75688-4;O75688-2;O75688-3	O75688;O75688-5;O75688-4;O75688-2	9;7;7;7;2	7;5;5;5;2	7;5;5;5;2	Protein phosphatase 1B	PPM1B	sp|O75688|PPM1B_HUMAN Protein phosphatase 1B OS=Homo sapiens OX=9606 GN=PPM1B PE=1 SV=1;sp|O75688-5|PPM1B_HUMAN Isoform 5 of Protein phosphatase 1B OS=Homo sapiens OX=9606 GN=PPM1B;sp|O75688-4|PPM1B_HUMAN Isoform 4 of Protein phosphatase 1B OS=Homo sapiens	5	9	7	7	2	3	9	6	7	7	6	5	6	6	6	5	6	5	3	4	2	3	5	7	3	3	1	1	7	6	7	7	6	5	6	6	4	3	5	5	1	2
O75691	O75691	30	30	30	Small subunit processome component 20 homolog	UTP20	sp|O75691|UTP20_HUMAN Small subunit processome component 20 homolog OS=Homo sapiens OX=9606 GN=UTP20 PE=1 SV=3	1	30	30	30	6	8	14	15	14	14	14	14	11	13	20	17	18	13	11	7	8	12	13	14	11	9	6	8	14	15	14	14	14	14	11	13	20	17	18	13	11	7
O75694;O75694-2	O75694;O75694-2	26;25	26;25	26;25	Nuclear pore complex protein Nup155	NUP155	sp|O75694|NU155_HUMAN Nuclear pore complex protein Nup155 OS=Homo sapiens OX=9606 GN=NUP155 PE=1 SV=1;sp|O75694-2|NU155_HUMAN Isoform 2 of Nuclear pore complex protein Nup155 OS=Homo sapiens OX=9606 GN=NUP155	2	26	26	26	11	9	18	16	18	17	16	15	18	17	21	20	19	15	17	19	16	16	15	17	13	11	11	9	18	16	18	17	16	15	18	17	21	20	19	15	17	19
O75695	O75695	7	7	7	Protein XRP2	RP2	sp|O75695|XRP2_HUMAN Protein XRP2 OS=Homo sapiens OX=9606 GN=RP2 PE=1 SV=4	1	7	7	7	1	2	4	2	2	4	4	3	5	3	2	3	3	3	3	3	1	2	4	3	1	1	1	2	4	2	2	4	4	3	5	3	2	3	3	3	3	3
O75717;O75717-2	O75717;O75717-2	20;17	20;17	20;17	WD repeat and HMG-box DNA-binding protein 1	WDHD1	sp|O75717|WDHD1_HUMAN WD repeat and HMG-box DNA-binding protein 1 OS=Homo sapiens OX=9606 GN=WDHD1 PE=1 SV=1;sp|O75717-2|WDHD1_HUMAN Isoform 2 of WD repeat and HMG-box DNA-binding protein 1 OS=Homo sapiens OX=9606 GN=WDHD1	2	20	20	20	3	5	11	11	13	14	16	16	8	10	11	11	10	13	5	6	4	10	10	11	9	4	3	5	11	11	13	14	16	16	8	10	11	11	10	13	5	6
O75718	O75718	11	11	11	Cartilage-associated protein	CRTAP	sp|O75718|CRTAP_HUMAN Cartilage-associated protein OS=Homo sapiens OX=9606 GN=CRTAP PE=1 SV=1	1	11	11	11	5	4	7	5	4	5	4	4	5	4	5	6	5	5	7	6	4	6	2	6	3	4	5	4	7	5	4	5	4	4	5	4	5	6	5	5	7	6
O75746;O75746-2	O75746;O75746-2	13;11	8;6	8;6	Calcium-binding mitochondrial carrier protein Aralar1	SLC25A12	sp|O75746|CMC1_HUMAN Calcium-binding mitochondrial carrier protein Aralar1 OS=Homo sapiens OX=9606 GN=SLC25A12 PE=1 SV=2;sp|O75746-2|CMC1_HUMAN Isoform 2 of Calcium-binding mitochondrial carrier protein Aralar1 OS=Homo sapiens OX=9606 GN=SLC25A12	2	13	8	8	3	3	5	5	8	6	5	3	5	5	11	10	7	6	8	7	6	7	5	6	9	9	1	1	3	3	6	4	4	2	3	4	6	6	4	3	4	4
O75787-2;O75787	O75787-2;O75787	5;5	5;5	5;5	Renin receptor	ATP6AP2	sp|O75787-2|RENR_HUMAN Isoform 2 of Renin receptor OS=Homo sapiens OX=9606 GN=ATP6AP2;sp|O75787|RENR_HUMAN Renin receptor OS=Homo sapiens OX=9606 GN=ATP6AP2 PE=1 SV=2	2	5	5	5	1	0	4	3	3	4	1	4	1	2	2	4	2	3	3	1	2	1	3	3	3	2	1	0	4	3	3	4	1	4	1	2	2	4	2	3	3	1
O75792	O75792	7	7	7	Ribonuclease H2 subunit A	RNASEH2A	sp|O75792|RNH2A_HUMAN Ribonuclease H2 subunit A OS=Homo sapiens OX=9606 GN=RNASEH2A PE=1 SV=2	1	7	7	7	6	3	5	4	5	4	5	5	6	5	6	5	5	5	4	3	1	2	3	3	5	3	6	3	5	4	5	4	5	5	6	5	6	5	5	5	4	3
O75794	O75794	11	11	11	Cell division cycle protein 123 homolog	CDC123	sp|O75794|CD123_HUMAN Cell division cycle protein 123 homolog OS=Homo sapiens OX=9606 GN=CDC123 PE=1 SV=1	1	11	11	11	5	6	8	4	3	4	4	4	4	6	7	6	5	3	4	5	5	6	4	5	9	8	5	6	8	4	3	4	4	4	4	6	7	6	5	3	4	5
O75815	O75815	1	1	1	Breast cancer anti-estrogen resistance protein 3	BCAR3	sp|O75815|BCAR3_HUMAN Breast cancer anti-estrogen resistance protein 3 OS=Homo sapiens OX=9606 GN=BCAR3 PE=1 SV=1	1	1	1	1	0	0	0	0	1	1	1	0	1	1	0	1	1	1	0	0	0	0	1	1	1	1	0	0	0	0	1	1	1	0	1	1	0	1	1	1	0	0
O75817	O75817	4	4	4	Ribonuclease P protein subunit p20	POP7	sp|O75817|POP7_HUMAN Ribonuclease P protein subunit p20 OS=Homo sapiens OX=9606 GN=POP7 PE=1 SV=2	1	4	4	4	2	2	4	2	3	4	3	3	4	4	2	2	2	1	1	1	1	2	4	4	3	1	2	2	4	2	3	4	3	3	4	4	2	2	2	1	1	1
O75818-2;O75818	O75818-2;O75818	5;5	5;5	5;5	Ribonuclease P protein subunit p40	RPP40	sp|O75818-2|RPP40_HUMAN Isoform 2 of Ribonuclease P protein subunit p40 OS=Homo sapiens OX=9606 GN=RPP40;sp|O75818|RPP40_HUMAN Ribonuclease P protein subunit p40 OS=Homo sapiens OX=9606 GN=RPP40 PE=1 SV=3	2	5	5	5	0	0	4	3	4	4	4	4	3	3	4	4	4	3	0	2	2	1	3	3	2	1	0	0	4	3	4	4	4	4	3	3	4	4	4	3	0	2
O75821	O75821	18	18	18	Eukaryotic translation initiation factor 3 subunit G	EIF3G	sp|O75821|EIF3G_HUMAN Eukaryotic translation initiation factor 3 subunit G OS=Homo sapiens OX=9606 GN=EIF3G PE=1 SV=2	1	18	18	18	11	9	11	13	11	13	14	13	13	13	15	14	14	12	17	12	10	16	13	15	10	12	11	9	11	13	11	13	14	13	13	13	15	14	14	12	17	12
O75822;O75822-3;O75822-2	O75822;O75822-3;O75822-2	13;12;9	13;12;9	13;12;9	Eukaryotic translation initiation factor 3 subunit J	EIF3J	sp|O75822|EIF3J_HUMAN Eukaryotic translation initiation factor 3 subunit J OS=Homo sapiens OX=9606 GN=EIF3J PE=1 SV=2;sp|O75822-3|EIF3J_HUMAN Isoform 3 of Eukaryotic translation initiation factor 3 subunit J OS=Homo sapiens OX=9606 GN=EIF3J;sp|O75822-2|EIF	3	13	13	13	3	4	7	6	9	10	5	7	9	6	9	10	9	9	8	7	5	4	6	6	8	8	3	4	7	6	9	10	5	7	9	6	9	10	9	9	8	7
O75828	O75828	18	15	15	Carbonyl reductase [NADPH] 3	CBR3	sp|O75828|CBR3_HUMAN Carbonyl reductase [NADPH] 3 OS=Homo sapiens OX=9606 GN=CBR3 PE=1 SV=3	1	18	15	15	9	10	11	10	11	10	9	10	10	8	13	13	11	11	14	13	15	14	9	9	9	11	6	7	8	8	8	7	7	7	7	6	10	10	8	9	11	11
O75832;O75832-2	O75832;O75832-2	8;4	8;4	8;4	26S proteasome non-ATPase regulatory subunit 10	PSMD10	sp|O75832|PSD10_HUMAN 26S proteasome non-ATPase regulatory subunit 10 OS=Homo sapiens OX=9606 GN=PSMD10 PE=1 SV=1;sp|O75832-2|PSD10_HUMAN Isoform 2 of 26S proteasome non-ATPase regulatory subunit 10 OS=Homo sapiens OX=9606 GN=PSMD10	2	8	8	8	4	2	7	8	8	8	8	7	7	8	7	7	7	6	6	4	4	3	7	8	6	6	4	2	7	8	8	8	8	7	7	8	7	7	7	6	6	4
O75844	O75844	8	8	8	CAAX prenyl protease 1 homolog	ZMPSTE24	sp|O75844|FACE1_HUMAN CAAX prenyl protease 1 homolog OS=Homo sapiens OX=9606 GN=ZMPSTE24 PE=1 SV=2	1	8	8	8	4	6	5	4	3	5	4	4	4	4	6	4	3	3	5	5	7	6	4	5	5	5	4	6	5	4	3	5	4	4	4	4	6	4	3	3	5	5
O75874	O75874	30	30	29	Isocitrate dehydrogenase [NADP] cytoplasmic	IDH1	sp|O75874|IDHC_HUMAN Isocitrate dehydrogenase [NADP] cytoplasmic OS=Homo sapiens OX=9606 GN=IDH1 PE=1 SV=2	1	30	30	29	21	22	19	19	19	21	21	21	21	22	14	19	16	16	20	18	18	17	20	19	24	20	21	22	19	19	19	21	21	21	21	22	14	19	16	16	20	18
O75879	O75879	6	6	6	Glutamyl-tRNA(Gln) amidotransferase subunit B, mitochondrial	GATB	sp|O75879|GATB_HUMAN Glutamyl-tRNA(Gln) amidotransferase subunit B, mitochondrial OS=Homo sapiens OX=9606 GN=GATB PE=1 SV=1	1	6	6	6	1	0	5	1	3	2	2	2	1	2	3	5	4	4	1	1	0	1	2	1	3	2	1	0	5	1	3	2	2	2	1	2	3	5	4	4	1	1
O75880	O75880	3	3	3	Protein SCO1 homolog, mitochondrial	SCO1	sp|O75880|SCO1_HUMAN Protein SCO1 homolog, mitochondrial OS=Homo sapiens OX=9606 GN=SCO1 PE=1 SV=1	1	3	3	3	2	1	3	3	3	3	3	3	3	3	3	3	3	2	3	3	3	2	3	3	3	3	2	1	3	3	3	3	3	3	3	3	3	3	3	2	3	3
O75884;O75884-2	O75884;O75884-2	4;2	4;2	4;2	Putative hydrolase RBBP9	RBBP9	sp|O75884|RBBP9_HUMAN Serine hydrolase RBBP9 OS=Homo sapiens OX=9606 GN=RBBP9 PE=1 SV=2;sp|O75884-2|RBBP9_HUMAN Isoform 2 of Serine hydrolase RBBP9 OS=Homo sapiens OX=9606 GN=RBBP9	2	4	4	4	2	1	3	3	4	4	4	4	3	4	2	2	4	3	2	2	1	1	3	3	1	1	2	1	3	3	4	4	4	4	3	4	2	2	4	3	2	2
O75886;O75886-2	O75886;O75886-2	9;6	7;5	7;5	Signal transducing adapter molecule 2	STAM2	sp|O75886|STAM2_HUMAN Signal transducing adapter molecule 2 OS=Homo sapiens OX=9606 GN=STAM2 PE=1 SV=1;sp|O75886-2|STAM2_HUMAN Isoform 2 of Signal transducing adapter molecule 2 OS=Homo sapiens OX=9606 GN=STAM2	2	9	7	7	5	5	5	4	4	6	4	5	5	5	6	6	6	5	6	5	5	4	4	4	6	6	4	4	3	2	2	4	2	3	3	3	4	4	4	3	4	4
O75896	O75896	2	2	2	Tumor suppressor candidate 2	TUSC2	sp|O75896|TUSC2_HUMAN Tumor suppressor candidate 2 OS=Homo sapiens OX=9606 GN=TUSC2 PE=1 SV=3	1	2	2	2	2	1	2	1	2	2	2	1	0	0	2	2	1	1	2	2	1	2	2	1	2	2	2	1	2	1	2	2	2	1	0	0	2	2	1	1	2	2
O75909-1;O75909;O75909-4;O75909-2	O75909-1;O75909;O75909-4;O75909-2	3;3;3;2	3;3;3;2	3;3;3;2	Cyclin-K	CCNK	sp|O75909-1|CCNK_HUMAN Isoform 3 of Cyclin-K OS=Homo sapiens OX=9606 GN=CCNK;sp|O75909|CCNK_HUMAN Cyclin-K OS=Homo sapiens OX=9606 GN=CCNK PE=1 SV=2;sp|O75909-4|CCNK_HUMAN Isoform 4 of Cyclin-K OS=Homo sapiens OX=9606 GN=CCNK;sp|O75909-2|CCNK_HUMAN Isoform	4	3	3	3	0	0	3	3	3	3	3	2	2	3	1	1	3	2	0	0	0	0	3	3	1	1	0	0	3	3	3	3	3	2	2	3	1	1	3	2	0	0
O75915	O75915	5	5	5	PRA1 family protein 3	ARL6IP5	sp|O75915|PRAF3_HUMAN PRA1 family protein 3 OS=Homo sapiens OX=9606 GN=ARL6IP5 PE=1 SV=1	1	5	5	5	3	3	2	2	2	2	3	2	2	2	4	4	3	2	3	4	5	5	2	2	3	2	3	3	2	2	2	2	3	2	2	2	4	4	3	2	3	4
O75925-2;O75925;O75925-3	O75925-2;O75925;O75925-3	2;2;1	1;1;1	1;1;1	E3 SUMO-protein ligase PIAS1	PIAS1	sp|O75925-2|PIAS1_HUMAN Isoform 2 of E3 SUMO-protein ligase PIAS1 OS=Homo sapiens OX=9606 GN=PIAS1;sp|O75925|PIAS1_HUMAN E3 SUMO-protein ligase PIAS1 OS=Homo sapiens OX=9606 GN=PIAS1 PE=1 SV=2;sp|O75925-3|PIAS1_HUMAN Isoform 3 of E3 SUMO-protein ligase PIA	3	2	1	1	1	0	2	0	1	1	1	1	2	1	1	1	2	2	1	0	1	1	1	1	2	1	0	0	1	0	1	1	1	1	1	1	0	0	1	1	0	0
O75928-2;O75928-3;O75928	O75928-2;O75928-3;O75928	3;2;2	3;2;2	2;1;1	E3 SUMO-protein ligase PIAS2	PIAS2	sp|O75928-2|PIAS2_HUMAN Isoform PIAS2-alpha of E3 SUMO-protein ligase PIAS2 OS=Homo sapiens OX=9606 GN=PIAS2;sp|O75928-3|PIAS2_HUMAN Isoform 3 of E3 SUMO-protein ligase PIAS2 OS=Homo sapiens OX=9606 GN=PIAS2;sp|O75928|PIAS2_HUMAN E3 SUMO-protein ligase PIA	3	3	3	2	1	0	2	1	2	2	2	2	3	1	2	2	2	2	1	0	1	1	0	0	1	0	1	0	2	1	2	2	2	2	3	1	2	2	2	2	1	0
O75934	O75934	15	15	15	Pre-mRNA-splicing factor SPF27	BCAS2	sp|O75934|SPF27_HUMAN Pre-mRNA-splicing factor SPF27 OS=Homo sapiens OX=9606 GN=BCAS2 PE=1 SV=1	1	15	15	15	10	11	10	11	9	9	9	10	10	7	12	13	9	10	10	10	10	10	7	7	10	10	10	11	10	11	9	9	9	10	10	7	12	13	9	10	10	10
O75935-3;O75935-2;O75935	O75935-3;O75935-2;O75935	3;3;3	3;3;3	3;3;3	Dynactin subunit 3	DCTN3	sp|O75935-3|DCTN3_HUMAN Isoform 3 of Dynactin subunit 3 OS=Homo sapiens OX=9606 GN=DCTN3;sp|O75935-2|DCTN3_HUMAN Isoform 2 of Dynactin subunit 3 OS=Homo sapiens OX=9606 GN=DCTN3;sp|O75935|DCTN3_HUMAN Dynactin subunit 3 OS=Homo sapiens OX=9606 GN=DCTN3 PE=1	3	3	3	3	1	0	0	0	0	0	0	0	0	0	0	1	0	0	1	0	1	1	0	0	1	0	1	0	0	0	0	0	0	0	0	0	0	1	0	0	1	0
O75937	O75937	20	20	20	DnaJ homolog subfamily C member 8	DNAJC8	sp|O75937|DNJC8_HUMAN DnaJ homolog subfamily C member 8 OS=Homo sapiens OX=9606 GN=DNAJC8 PE=1 SV=2	1	20	20	20	14	14	13	11	13	13	13	12	12	12	16	16	14	13	15	11	12	12	12	13	17	15	14	14	13	11	13	13	13	12	12	12	16	16	14	13	15	11
O75940	O75940	7	7	7	Survival of motor neuron-related-splicing factor 30	SMNDC1	sp|O75940|SPF30_HUMAN Survival of motor neuron-related-splicing factor 30 OS=Homo sapiens OX=9606 GN=SMNDC1 PE=1 SV=1	1	7	7	7	5	4	4	5	4	4	4	4	4	4	6	6	4	3	5	5	4	6	3	4	5	4	5	4	4	5	4	4	4	4	4	4	6	6	4	3	5	5
O75943-4;O75943-3;O75943-2;O75943	O75943-4;O75943-3;O75943-2;O75943	2;1;1;1	2;1;1;1	2;1;1;1	Cell cycle checkpoint protein RAD17	RAD17	sp|O75943-4|RAD17_HUMAN Isoform 4 of Cell cycle checkpoint protein RAD17 OS=Homo sapiens OX=9606 GN=RAD17;sp|O75943-3|RAD17_HUMAN Isoform 3 of Cell cycle checkpoint protein RAD17 OS=Homo sapiens OX=9606 GN=RAD17;sp|O75943-2|RAD17_HUMAN Isoform 2 of Cell cy	4	2	2	2	1	0	1	2	1	1	1	1	1	1	2	1	1	1	0	2	1	1	1	1	0	2	1	0	1	2	1	1	1	1	1	1	2	1	1	1	0	2
O75947;O75947-2	O75947;O75947-2	19;17	19;17	19;17	ATP synthase subunit d, mitochondrial	ATP5H	sp|O75947|ATP5H_HUMAN ATP synthase subunit d, mitochondrial OS=Homo sapiens OX=9606 GN=ATP5PD PE=1 SV=3;sp|O75947-2|ATP5H_HUMAN Isoform 2 of ATP synthase subunit d, mitochondrial OS=Homo sapiens OX=9606 GN=ATP5PD	2	19	19	19	16	16	16	12	13	12	13	13	12	11	14	13	12	12	12	11	13	13	10	12	16	16	16	16	16	12	13	12	13	13	12	11	14	13	12	12	12	11
O75955;O75955-2	O75955;O75955-2	21;17	21;17	21;17	Flotillin-1	FLOT1	sp|O75955|FLOT1_HUMAN Flotillin-1 OS=Homo sapiens OX=9606 GN=FLOT1 PE=1 SV=3;sp|O75955-2|FLOT1_HUMAN Isoform 2 of Flotillin-1 OS=Homo sapiens OX=9606 GN=FLOT1	2	21	21	21	15	15	15	13	15	15	13	13	13	12	19	18	14	12	17	16	10	14	12	14	14	11	15	15	15	13	15	15	13	13	13	12	19	18	14	12	17	16
O75962-5;O75962-2;O75962-4;O75962	O75962-5;O75962-2;O75962-4;O75962	4;4;4;4	4;4;4;4	3;3;3;3	Triple functional domain protein	TRIO	sp|O75962-5|TRIO_HUMAN Isoform 5 of Triple functional domain protein OS=Homo sapiens OX=9606 GN=TRIO;sp|O75962-2|TRIO_HUMAN Isoform 2 of Triple functional domain protein OS=Homo sapiens OX=9606 GN=TRIO;sp|O75962-4|TRIO_HUMAN Isoform 4 of Triple functional	4	4	4	3	1	1	1	1	3	1	3	2	1	1	0	0	0	0	0	1	0	1	0	2	2	2	1	1	1	1	3	1	3	2	1	1	0	0	0	0	0	1
O75964	O75964	6	6	6	ATP synthase subunit g, mitochondrial	ATP5L	sp|O75964|ATP5L_HUMAN ATP synthase subunit g, mitochondrial OS=Homo sapiens OX=9606 GN=ATP5MG PE=1 SV=3	1	6	6	6	6	6	3	4	4	2	4	3	5	3	5	5	4	3	4	5	4	5	5	3	4	4	6	6	3	4	4	2	4	3	5	3	5	5	4	3	4	5
O75976-2;O75976	O75976-2;O75976	2;2	2;2	2;2	Carboxypeptidase D	CPD	sp|O75976-2|CBPD_HUMAN Isoform 2 of Carboxypeptidase D OS=Homo sapiens OX=9606 GN=CPD;sp|O75976|CBPD_HUMAN Carboxypeptidase D OS=Homo sapiens OX=9606 GN=CPD PE=1 SV=2	2	2	2	2	0	0	1	1	2	2	2	2	2	2	1	0	2	0	0	0	0	0	2	2	1	2	0	0	1	1	2	2	2	2	2	2	1	0	2	0	0	0
O76003	O76003	20	20	20	Glutaredoxin-3	GLRX3	sp|O76003|GLRX3_HUMAN Glutaredoxin-3 OS=Homo sapiens OX=9606 GN=GLRX3 PE=1 SV=2	1	20	20	20	12	13	12	11	11	12	11	12	13	12	14	15	14	10	16	13	8	13	12	10	11	11	12	13	12	11	11	12	11	12	13	12	14	15	14	10	16	13
O76021;O76021-2	O76021	23;9	23;9	23;9	Ribosomal L1 domain-containing protein 1	RSL1D1	sp|O76021|RL1D1_HUMAN Ribosomal L1 domain-containing protein 1 OS=Homo sapiens OX=9606 GN=RSL1D1 PE=1 SV=3	2	23	23	23	15	18	19	17	17	17	18	16	15	15	17	17	16	17	16	15	15	13	17	16	15	16	15	18	19	17	17	17	18	16	15	15	17	17	16	17	16	15
O76024	O76024	2	2	2	Wolframin	WFS1	sp|O76024|WFS1_HUMAN Wolframin OS=Homo sapiens OX=9606 GN=WFS1 PE=1 SV=2	1	2	2	2	0	0	1	0	1	1	0	0	0	0	2	2	1	1	1	1	0	0	0	0	0	2	0	0	1	0	1	1	0	0	0	0	2	2	1	1	1	1
O76031	O76031	17	17	17	ATP-dependent Clp protease ATP-binding subunit clpX-like, mitochondrial	CLPX	sp|O76031|CLPX_HUMAN ATP-dependent Clp protease ATP-binding subunit clpX-like, mitochondrial OS=Homo sapiens OX=9606 GN=CLPX PE=1 SV=2	1	17	17	17	9	8	9	7	6	7	7	5	6	5	9	9	4	5	12	12	9	11	6	8	9	11	9	8	9	7	6	7	7	5	6	5	9	9	4	5	12	12
O76054;O76054-5;O76054-4;Q9UDX4;Q9UDX4-3;Q9UDX4-2	O76054;O76054-5;O76054-4	7;6;6;2;1;1	7;6;6;2;1;1	7;6;6;2;1;1	SEC14-like protein 2	SEC14L2	sp|O76054|S14L2_HUMAN SEC14-like protein 2 OS=Homo sapiens OX=9606 GN=SEC14L2 PE=1 SV=1;sp|O76054-5|S14L2_HUMAN Isoform 3 of SEC14-like protein 2 OS=Homo sapiens OX=9606 GN=SEC14L2;sp|O76054-4|S14L2_HUMAN Isoform 2 of SEC14-like protein 2 OS=Homo sapiens O	6	7	7	7	1	1	5	5	5	4	3	6	5	6	4	2	5	4	0	0	0	0	6	5	1	2	1	1	5	5	5	4	3	6	5	6	4	2	5	4	0	0
O76071	O76071	9	9	9	Probable cytosolic iron-sulfur protein assembly protein CIAO1	CIAO1	sp|O76071|CIAO1_HUMAN Probable cytosolic iron-sulfur protein assembly protein CIAO1 OS=Homo sapiens OX=9606 GN=CIAO1 PE=1 SV=1	1	9	9	9	6	5	5	4	6	6	5	4	6	4	8	8	5	5	7	7	6	8	5	6	2	2	6	5	5	4	6	6	5	4	6	4	8	8	5	5	7	7
O76075;O76075-2;O76075-4;O76075-3	O76075;O76075-2	3;2;1;1	3;2;1;1	3;2;1;1	DNA fragmentation factor subunit beta	DFFB	sp|O76075|DFFB_HUMAN DNA fragmentation factor subunit beta OS=Homo sapiens OX=9606 GN=DFFB PE=1 SV=1;sp|O76075-2|DFFB_HUMAN Isoform Beta of DNA fragmentation factor subunit beta OS=Homo sapiens OX=9606 GN=DFFB	4	3	3	3	2	2	3	3	3	2	3	2	2	3	1	1	3	0	1	1	1	1	2	2	2	1	2	2	3	3	3	2	3	2	2	3	1	1	3	0	1	1
O76080	O76080	7	7	5	AN1-type zinc finger protein 5	ZFAND5	sp|O76080|ZFAN5_HUMAN AN1-type zinc finger protein 5 OS=Homo sapiens OX=9606 GN=ZFAND5 PE=1 SV=1	1	7	7	5	2	1	4	4	4	3	4	3	3	4	5	4	5	4	2	1	1	3	4	3	2	3	2	1	4	4	4	3	4	3	3	4	5	4	5	4	2	1
O76081-5;O76081-6;O76081-2;O76081;O76081-4;O76081-3	O76081-5;O76081-6;O76081-2;O76081;O76081-4;O76081-3	2;2;2;2;1;1	2;2;2;2;1;1	2;2;2;2;1;1	Regulator of G-protein signaling 20	RGS20	sp|O76081-5|RGS20_HUMAN Isoform 4 of Regulator of G-protein signaling 20 OS=Homo sapiens OX=9606 GN=RGS20;sp|O76081-6|RGS20_HUMAN Isoform 5 of Regulator of G-protein signaling 20 OS=Homo sapiens OX=9606 GN=RGS20;sp|O76081-2|RGS20_HUMAN Isoform 1 of Regulat	6	2	2	2	1	1	2	2	2	1	2	2	1	2	1	1	1	1	0	0	0	0	2	1	1	1	1	1	2	2	2	1	2	2	1	2	1	1	1	1	0	0
O76094;O76094-2	O76094;O76094-2	32;30	32;30	32;30	Signal recognition particle subunit SRP72	SRP72	sp|O76094|SRP72_HUMAN Signal recognition particle subunit SRP72 OS=Homo sapiens OX=9606 GN=SRP72 PE=1 SV=3;sp|O76094-2|SRP72_HUMAN Isoform 2 of Signal recognition particle subunit SRP72 OS=Homo sapiens OX=9606 GN=SRP72	2	32	32	32	20	14	20	17	21	20	19	22	19	21	24	21	19	17	15	16	17	16	12	15	18	18	20	14	20	17	21	20	19	22	19	21	24	21	19	17	15	16
O77932	O77932	1	1	1	Decapping and exoribonuclease protein	DXO	sp|O77932|DXO_HUMAN Decapping and exoribonuclease protein OS=Homo sapiens OX=9606 GN=DXO PE=2 SV=2	1	1	1	1	0	0	1	1	1	1	1	1	0	1	1	1	1	1	0	1	0	1	0	0	0	0	0	0	1	1	1	1	1	1	0	1	1	1	1	1	0	1
O94763;O94763-2;O94763-4;O94763-3	O94763;O94763-2;O94763-4;O94763-3	2;1;1;1	2;1;1;1	2;1;1;1	Unconventional prefoldin RPB5 interactor 1	URI1	sp|O94763|RMP_HUMAN Unconventional prefoldin RPB5 interactor 1 OS=Homo sapiens OX=9606 GN=URI1 PE=1 SV=3;sp|O94763-2|RMP_HUMAN Isoform 2 of Unconventional prefoldin RPB5 interactor 1 OS=Homo sapiens OX=9606 GN=URI1;sp|O94763-4|RMP_HUMAN Isoform 4 of Unconv	4	2	2	2	1	0	2	2	2	2	1	2	1	2	2	2	1	1	1	1	0	0	2	1	1	2	1	0	2	2	2	2	1	2	1	2	2	2	1	1	1	1
O94766;O94766-2;Q9NPZ5	O94766;O94766-2	12;10;1	12;10;1	12;10;1	Galactosylgalactosylxylosylprotein 3-beta-glucuronosyltransferase 3	B3GAT3	sp|O94766|B3GA3_HUMAN Galactosylgalactosylxylosylprotein 3-beta-glucuronosyltransferase 3 OS=Homo sapiens OX=9606 GN=B3GAT3 PE=1 SV=2;sp|O94766-2|B3GA3_HUMAN Isoform 2 of Galactosylgalactosylxylosylprotein 3-beta-glucuronosyltransferase 3 OS=Homo sapiens O	3	12	12	12	5	9	5	5	6	5	3	4	5	3	9	8	6	5	8	7	6	7	4	5	8	7	5	9	5	5	6	5	3	4	5	3	9	8	6	5	8	7
O94776;O94776-2	O94776;O94776-2	38;27	38;27	33;24	Metastasis-associated protein MTA2	MTA2	sp|O94776|MTA2_HUMAN Metastasis-associated protein MTA2 OS=Homo sapiens OX=9606 GN=MTA2 PE=1 SV=1;sp|O94776-2|MTA2_HUMAN Isoform 2 of Metastasis-associated protein MTA2 OS=Homo sapiens OX=9606 GN=MTA2	2	38	38	33	25	25	25	25	22	24	23	24	23	23	31	31	23	23	32	29	27	28	24	23	30	29	25	25	25	25	22	24	23	24	23	23	31	31	23	23	32	29
O94782	O94782	2	2	1	Ubiquitin carboxyl-terminal hydrolase 1	USP1	sp|O94782|UBP1_HUMAN Ubiquitin carboxyl-terminal hydrolase 1 OS=Homo sapiens OX=9606 GN=USP1 PE=1 SV=1	1	2	2	1	1	0	1	0	1	1	1	1	1	1	1	1	1	0	0	0	0	0	1	1	1	1	1	0	1	0	1	1	1	1	1	1	1	1	1	0	0	0
O94804	O94804	41	41	38	Serine/threonine-protein kinase 10	STK10	sp|O94804|STK10_HUMAN Serine/threonine-protein kinase 10 OS=Homo sapiens OX=9606 GN=STK10 PE=1 SV=1	1	41	41	38	27	24	24	26	24	27	24	26	24	23	26	25	25	26	27	23	20	27	22	25	26	24	27	24	24	26	24	27	24	26	24	23	26	25	25	26	27	23
O94822-3;O94822;O94822-2	O94822-3;O94822	12;12;2	12;12;2	12;12;2	E3 ubiquitin-protein ligase listerin	LTN1	sp|O94822-3|LTN1_HUMAN Isoform 3 of E3 ubiquitin-protein ligase listerin OS=Homo sapiens OX=9606 GN=LTN1;sp|O94822|LTN1_HUMAN E3 ubiquitin-protein ligase listerin OS=Homo sapiens OX=9606 GN=LTN1 PE=1 SV=6	3	12	12	12	4	4	7	7	9	8	6	6	8	7	9	5	6	8	5	3	5	6	8	8	3	2	4	4	7	7	9	8	6	6	8	7	9	5	6	8	5	3
O94826	O94826	29	29	29	Mitochondrial import receptor subunit TOM70	TOMM70A	sp|O94826|TOM70_HUMAN Mitochondrial import receptor subunit TOM70 OS=Homo sapiens OX=9606 GN=TOMM70 PE=1 SV=1	1	29	29	29	21	17	22	21	21	22	23	22	22	21	25	24	21	20	25	25	17	19	21	20	19	17	21	17	22	21	21	22	23	22	22	21	25	24	21	20	25	25
O94829	O94829	4	4	4	Importin-13	IPO13	sp|O94829|IPO13_HUMAN Importin-13 OS=Homo sapiens OX=9606 GN=IPO13 PE=1 SV=3	1	4	4	4	2	1	2	2	1	2	1	1	1	1	2	2	1	1	2	1	2	1	1	2	2	1	2	1	2	2	1	2	1	1	1	1	2	2	1	1	2	1
O94832	O94832	36	36	36	Unconventional myosin-Id	MYO1D	sp|O94832|MYO1D_HUMAN Unconventional myosin-Id OS=Homo sapiens OX=9606 GN=MYO1D PE=1 SV=2	1	36	36	36	25	23	26	24	22	25	22	19	24	23	29	29	22	19	29	28	11	17	15	21	17	15	25	23	26	24	22	25	22	19	24	23	29	29	22	19	29	28
O94842-3;O94842-2;O94842;O94900;O15405-2;O15405	O94842-3;O94842-2;O94842;O94900;O15405-2;O15405	4;4;4;2;2;2	4;4;4;2;2;2	4;4;4;2;2;2	TOX high mobility group box family member 4;Thymocyte selection-associated high mobility group box protein TOX;TOX high mobility group box family member 3	TOX4;TOX;TOX3	sp|O94842-3|TOX4_HUMAN Isoform 3 of TOX high mobility group box family member 4 OS=Homo sapiens OX=9606 GN=TOX4;sp|O94842-2|TOX4_HUMAN Isoform 2 of TOX high mobility group box family member 4 OS=Homo sapiens OX=9606 GN=TOX4;sp|O94842|TOX4_HUMAN TOX high mo	6	4	4	4	1	0	1	0	1	2	1	2	2	2	2	2	2	2	1	0	0	1	3	3	0	1	1	0	1	0	1	2	1	2	2	2	2	2	2	2	1	0
O94855;O94855-2	O94855;O94855-2	12;12	10;10	10;10	Protein transport protein Sec24D	SEC24D	sp|O94855|SC24D_HUMAN Protein transport protein Sec24D OS=Homo sapiens OX=9606 GN=SEC24D PE=1 SV=2;sp|O94855-2|SC24D_HUMAN Isoform 2 of Protein transport protein Sec24D OS=Homo sapiens OX=9606 GN=SEC24D	2	12	10	10	6	5	6	6	6	7	5	3	4	5	9	10	8	7	8	6	5	4	3	6	3	1	5	4	5	5	5	6	4	2	3	4	8	9	7	6	7	5
O94874;O94874-2;O94874-3	O94874;O94874-2;O94874-3	14;11;8	14;11;8	14;11;8	E3 UFM1-protein ligase 1	UFL1	sp|O94874|UFL1_HUMAN E3 UFM1-protein ligase 1 OS=Homo sapiens OX=9606 GN=UFL1 PE=1 SV=2;sp|O94874-2|UFL1_HUMAN Isoform 2 of E3 UFM1-protein ligase 1 OS=Homo sapiens OX=9606 GN=UFL1;sp|O94874-3|UFL1_HUMAN Isoform 3 of E3 UFM1-protein ligase 1 OS=Homo sapien	3	14	14	14	11	5	7	8	9	9	11	11	11	10	10	9	11	10	10	11	8	8	10	8	9	7	11	5	7	8	9	9	11	11	11	10	10	9	11	10	10	11
O94875-11;O94875-9;O94875;O94875-8;O94875-12;O94875-7;O94875-5;O94875-3;O94875-2;O94875-4;O94875-10;O94875-6	O94875-11;O94875-9;O94875;O94875-8;O94875-12;O94875-7;O94875-5;O94875-3;O94875-2;O94875-4;O94875-10	16;15;15;13;13;13;12;12;12;12;12;1	16;15;15;13;13;13;12;12;12;12;12;1	16;15;15;13;13;13;12;12;12;12;12;1	Sorbin and SH3 domain-containing protein 2	SORBS2	sp|O94875-11|SRBS2_HUMAN Isoform 11 of Sorbin and SH3 domain-containing protein 2 OS=Homo sapiens OX=9606 GN=SORBS2;sp|O94875-9|SRBS2_HUMAN Isoform 9 of Sorbin and SH3 domain-containing protein 2 OS=Homo sapiens OX=9606 GN=SORBS2;sp|O94875|SRBS2_HUMAN Sorb	12	16	16	16	1	1	6	4	3	4	5	5	4	3	5	6	5	5	5	3	8	5	10	9	10	8	1	1	6	4	3	4	5	5	4	3	5	6	5	5	5	3
O94880	O94880	10	10	2	PHD finger protein 14	PHF14	sp|O94880|PHF14_HUMAN PHD finger protein 14 OS=Homo sapiens OX=9606 GN=PHF14 PE=1 SV=2	1	10	10	2	1	0	3	4	4	4	5	4	5	4	5	5	4	5	4	1	3	3	5	5	3	4	1	0	3	4	4	4	5	4	5	4	5	5	4	5	4	1
O94887-3;O94887-2;O94887	O94887-3;O94887-2;O94887	3;3;3	3;3;3	3;3;3	FERM, RhoGEF and pleckstrin domain-containing protein 2	FARP2	sp|O94887-3|FARP2_HUMAN Isoform 3 of FERM, ARHGEF and pleckstrin domain-containing protein 2 OS=Homo sapiens OX=9606 GN=FARP2;sp|O94887-2|FARP2_HUMAN Isoform 2 of FERM, ARHGEF and pleckstrin domain-containing protein 2 OS=Homo sapiens OX=9606 GN=FARP2;sp|O	3	3	3	3	0	0	2	1	2	1	3	3	1	3	1	0	0	0	0	0	0	0	1	1	0	0	0	0	2	1	2	1	3	3	1	3	1	0	0	0	0	0
O94888	O94888	7	7	7	UBX domain-containing protein 7	UBXN7	sp|O94888|UBXN7_HUMAN UBX domain-containing protein 7 OS=Homo sapiens OX=9606 GN=UBXN7 PE=1 SV=2	1	7	7	7	4	4	5	4	5	5	4	5	4	5	5	5	4	3	4	3	4	4	4	5	2	2	4	4	5	4	5	5	4	5	4	5	5	5	4	3	4	3
O94901-5;O94901-8;O94901;O94901-9;O94901-6;O94901-2;O94901-7;O94901-3	O94901-5;O94901-8;O94901;O94901-9;O94901-6	6;6;6;6;5;2;2;2	6;6;6;6;5;2;2;2	6;6;6;6;5;2;2;2	SUN domain-containing protein 1	SUN1	sp|O94901-5|SUN1_HUMAN Isoform 5 of SUN domain-containing protein 1 OS=Homo sapiens OX=9606 GN=SUN1;sp|O94901-8|SUN1_HUMAN Isoform 8 of SUN domain-containing protein 1 OS=Homo sapiens OX=9606 GN=SUN1;sp|O94901|SUN1_HUMAN SUN domain-containing protein 1 OS=	8	6	6	6	1	0	2	1	2	2	4	2	2	2	3	2	1	1	2	1	3	4	2	3	4	2	1	0	2	1	2	2	4	2	2	2	3	2	1	1	2	1
O94903	O94903	6	6	6	Proline synthase co-transcribed bacterial homolog protein	PROSC	sp|O94903|PLPHP_HUMAN Pyridoxal phosphate homeostasis protein OS=Homo sapiens OX=9606 GN=PLPBP PE=1 SV=1	1	6	6	6	5	4	4	5	5	5	4	5	4	4	4	5	4	4	4	3	3	2	2	3	2	3	5	4	4	5	5	5	4	5	4	4	4	5	4	4	4	3
O94905;O94905-2;O94905-3	O94905	16;2;2	16;2;2	13;1;1	Erlin-2	ERLIN2	sp|O94905|ERLN2_HUMAN Erlin-2 OS=Homo sapiens OX=9606 GN=ERLIN2 PE=1 SV=1	3	16	16	13	10	8	10	9	10	10	11	10	12	12	13	13	11	10	10	11	11	11	8	10	9	11	10	8	10	9	10	10	11	10	12	12	13	13	11	10	10	11
O94906;O94906-2	O94906;O94906-2	42;41	42;41	42;41	Pre-mRNA-processing factor 6	PRPF6	sp|O94906|PRP6_HUMAN Pre-mRNA-processing factor 6 OS=Homo sapiens OX=9606 GN=PRPF6 PE=1 SV=1;sp|O94906-2|PRP6_HUMAN Isoform 2 of Pre-mRNA-processing factor 6 OS=Homo sapiens OX=9606 GN=PRPF6	2	42	42	42	23	19	24	24	24	19	20	19	20	21	29	30	22	23	30	30	21	22	21	22	20	20	23	19	24	24	24	19	20	19	20	21	29	30	22	23	30	30
O94913	O94913	5	5	5	Pre-mRNA cleavage complex 2 protein Pcf11	PCF11	sp|O94913|PCF11_HUMAN Pre-mRNA cleavage complex 2 protein Pcf11 OS=Homo sapiens OX=9606 GN=PCF11 PE=1 SV=3	1	5	5	5	2	1	3	4	5	4	4	3	4	4	4	4	4	4	2	2	0	1	4	5	4	4	2	1	3	4	5	4	4	3	4	4	4	4	4	4	2	2
O94915;O94915-2	O94915	7;2	7;2	7;2	Protein furry homolog-like	FRYL	sp|O94915|FRYL_HUMAN Protein furry homolog-like OS=Homo sapiens OX=9606 GN=FRYL PE=1 SV=2	2	7	7	7	1	0	5	4	4	3	3	2	4	5	1	2	3	4	1	1	1	0	3	3	2	1	1	0	5	4	4	3	3	2	4	5	1	2	3	4	1	1
O94919	O94919	3	3	3	Endonuclease domain-containing 1 protein	ENDOD1	sp|O94919|ENDD1_HUMAN Endonuclease domain-containing 1 protein OS=Homo sapiens OX=9606 GN=ENDOD1 PE=1 SV=2	1	3	3	3	2	1	2	2	1	1	1	2	1	1	2	3	3	1	1	2	0	2	1	1	1	1	2	1	2	2	1	1	1	2	1	1	2	3	3	1	1	2
O94923	O94923	2	2	2	D-glucuronyl C5-epimerase	GLCE	sp|O94923|GLCE_HUMAN D-glucuronyl C5-epimerase OS=Homo sapiens OX=9606 GN=GLCE PE=1 SV=3	1	2	2	2	0	0	1	1	1	1	1	1	0	1	2	1	1	1	0	0	0	0	1	1	1	1	0	0	1	1	1	1	1	1	0	1	2	1	1	1	0	0
O94925;O94925-2	O94925	39;7	39;7	7;0	Glutaminase kidney isoform, mitochondrial	GLS	sp|O94925|GLSK_HUMAN Glutaminase kidney isoform, mitochondrial OS=Homo sapiens OX=9606 GN=GLS PE=1 SV=1	2	39	39	7	32	31	29	31	29	26	28	27	24	27	34	31	28	28	32	33	24	25	28	30	27	27	32	31	29	31	29	26	28	27	24	27	34	31	28	28	32	33
O94925-3	O94925-3	37	5	5	Glutaminase kidney isoform, mitochondrial	GLS	sp|O94925-3|GLSK_HUMAN Isoform 3 of Glutaminase kidney isoform, mitochondrial OS=Homo sapiens OX=9606 GN=GLS	1	37	5	5	31	30	29	31	29	26	28	27	25	27	33	31	28	28	30	33	24	27	30	30	28	28	5	4	5	5	5	4	4	4	4	4	5	5	5	5	5	5
O94927;O94927-2	O94927;O94927-2	2;1	2;1	2;1	HAUS augmin-like complex subunit 5	HAUS5	sp|O94927|HAUS5_HUMAN HAUS augmin-like complex subunit 5 OS=Homo sapiens OX=9606 GN=HAUS5 PE=1 SV=2;sp|O94927-2|HAUS5_HUMAN Isoform 2 of HAUS augmin-like complex subunit 5 OS=Homo sapiens OX=9606 GN=HAUS5	2	2	2	2	0	1	1	0	0	0	0	0	1	1	0	0	1	1	0	0	0	1	0	1	0	0	0	1	1	0	0	0	0	0	1	1	0	0	1	1	0	0
O94953;O94953-2	O94953	5;2	5;2	5;2	Lysine-specific demethylase 4B	KDM4B	sp|O94953|KDM4B_HUMAN Lysine-specific demethylase 4B OS=Homo sapiens OX=9606 GN=KDM4B PE=1 SV=4	2	5	5	5	0	0	3	4	3	4	2	4	4	5	0	2	1	3	1	1	0	0	3	2	1	0	0	0	3	4	3	4	2	4	4	5	0	2	1	3	1	1
O94955	O94955	2	2	2	Rho-related BTB domain-containing protein 3	RHOBTB3	sp|O94955|RHBT3_HUMAN Rho-related BTB domain-containing protein 3 OS=Homo sapiens OX=9606 GN=RHOBTB3 PE=1 SV=2	1	2	2	2	0	0	1	1	1	1	2	1	2	2	0	0	1	2	0	0	0	0	1	2	0	0	0	0	1	1	1	1	2	1	2	2	0	0	1	2	0	0
O94966-4;O94966-3;O94966-7;O94966-6;O94966;O94966-5;O94966-2	O94966-4;O94966-3;O94966-7;O94966-6;O94966;O94966-5	11;11;11;11;10;10;2	11;11;11;11;10;10;2	11;11;11;11;10;10;2	Ubiquitin carboxyl-terminal hydrolase 19	USP19	sp|O94966-4|UBP19_HUMAN Isoform 4 of Ubiquitin carboxyl-terminal hydrolase 19 OS=Homo sapiens OX=9606 GN=USP19;sp|O94966-3|UBP19_HUMAN Isoform 3 of Ubiquitin carboxyl-terminal hydrolase 19 OS=Homo sapiens OX=9606 GN=USP19;sp|O94966-7|UBP19_HUMAN Isoform 7	7	11	11	11	2	1	4	3	4	5	4	5	4	4	6	6	6	5	3	1	4	0	4	4	4	5	2	1	4	3	4	5	4	5	4	4	6	6	6	5	3	1
O94973-2;O94973;O94973-3	O94973-2;O94973;O94973-3	25;25;17	18;18;10	18;18;10	AP-2 complex subunit alpha-2	AP2A2	sp|O94973-2|AP2A2_HUMAN Isoform 2 of AP-2 complex subunit alpha-2 OS=Homo sapiens OX=9606 GN=AP2A2;sp|O94973|AP2A2_HUMAN AP-2 complex subunit alpha-2 OS=Homo sapiens OX=9606 GN=AP2A2 PE=1 SV=2;sp|O94973-3|AP2A2_HUMAN Isoform 3 of AP-2 complex subunit alpha	3	25	18	18	13	12	11	11	12	13	10	12	11	12	16	13	12	14	17	13	13	16	10	11	11	10	7	6	8	7	9	9	6	9	7	8	11	8	8	10	11	7
O94979-4;O94979;O94979-6;O94979-3;O94979-10;O94979-9;O94979-2;O94979-8;O94979-5	O94979-4;O94979;O94979-6;O94979-3;O94979-10;O94979-9;O94979-2;O94979-8;O94979-5	41;41;40;40;40;40;40;40;23	41;41;40;40;40;40;40;40;23	8;8;7;7;7;7;7;7;7	Protein transport protein Sec31A	SEC31A	sp|O94979-4|SC31A_HUMAN Isoform 4 of Protein transport protein Sec31A OS=Homo sapiens OX=9606 GN=SEC31A;sp|O94979|SC31A_HUMAN Protein transport protein Sec31A OS=Homo sapiens OX=9606 GN=SEC31A PE=1 SV=3;sp|O94979-6|SC31A_HUMAN Isoform 6 of Protein transpor	9	41	41	8	26	21	21	26	26	26	26	26	24	22	32	28	26	23	28	24	20	21	24	24	28	28	26	21	21	26	26	26	26	26	24	22	32	28	26	23	28	24
O94992	O94992	15	15	15	Protein HEXIM1	HEXIM1	sp|O94992|HEXI1_HUMAN Protein HEXIM1 OS=Homo sapiens OX=9606 GN=HEXIM1 PE=1 SV=1	1	15	15	15	7	5	8	8	11	10	10	10	10	11	9	9	9	10	9	5	6	5	10	11	9	11	7	5	8	8	11	10	10	10	10	11	9	9	9	10	9	5
O95067	O95067	1	1	1	G2/mitotic-specific cyclin-B2	CCNB2	sp|O95067|CCNB2_HUMAN G2/mitotic-specific cyclin-B2 OS=Homo sapiens OX=9606 GN=CCNB2 PE=1 SV=1	1	1	1	1	0	0	1	1	1	0	0	0	0	1	0	0	0	0	0	0	0	0	1	1	0	1	0	0	1	1	1	0	0	0	0	1	0	0	0	0	0	0
O95071-2;O95071	O95071-2;O95071	12;12	12;12	11;11	E3 ubiquitin-protein ligase UBR5	UBR5	sp|O95071-2|UBR5_HUMAN Isoform 2 of E3 ubiquitin-protein ligase UBR5 OS=Homo sapiens OX=9606 GN=UBR5;sp|O95071|UBR5_HUMAN E3 ubiquitin-protein ligase UBR5 OS=Homo sapiens OX=9606 GN=UBR5 PE=1 SV=2	2	12	12	11	1	1	2	7	6	10	8	6	6	7	4	4	6	7	1	1	1	1	6	7	3	4	1	1	2	7	6	10	8	6	6	7	4	4	6	7	1	1
O95081;O95081-2	O95081;O95081-2	5;3	4;2	4;2	Arf-GAP domain and FG repeat-containing protein 2	AGFG2	sp|O95081|AGFG2_HUMAN Arf-GAP domain and FG repeat-containing protein 2 OS=Homo sapiens OX=9606 GN=AGFG2 PE=1 SV=2;sp|O95081-2|AGFG2_HUMAN Isoform 2 of Arf-GAP domain and FG repeat-containing protein 2 OS=Homo sapiens OX=9606 GN=AGFG2	2	5	4	4	0	0	0	0	1	1	1	0	1	1	0	0	0	0	0	0	2	2	2	3	4	2	0	0	0	0	1	1	1	0	1	1	0	0	0	0	0	0
O95104-2;O95104-3;O95104	O95104-2;O95104-3;O95104	6;6;6	5;5;5	5;5;5	Splicing factor, arginine/serine-rich 15	SCAF4	sp|O95104-2|SCAF4_HUMAN Isoform 2 of SR-related and CTD-associated factor 4 OS=Homo sapiens OX=9606 GN=SCAF4;sp|O95104-3|SCAF4_HUMAN Isoform 3 of SR-related and CTD-associated factor 4 OS=Homo sapiens OX=9606 GN=SCAF4;sp|O95104|SCAF4_HUMAN SR-related and C	3	6	5	5	0	0	1	3	3	3	1	1	2	2	3	2	3	4	1	1	2	2	2	3	1	1	0	0	1	3	3	3	1	1	2	2	3	2	3	4	1	1
O95139;O95139-2	O95139;O95139-2	3;2	3;2	3;2	NADH dehydrogenase [ubiquinone] 1 beta subcomplex subunit 6	NDUFB6	sp|O95139|NDUB6_HUMAN NADH dehydrogenase [ubiquinone] 1 beta subcomplex subunit 6 OS=Homo sapiens OX=9606 GN=NDUFB6 PE=1 SV=3;sp|O95139-2|NDUB6_HUMAN Isoform 2 of NADH dehydrogenase [ubiquinone] 1 beta subcomplex subunit 6 OS=Homo sapiens OX=9606 GN=NDUFB6	2	3	3	3	1	2	2	2	2	2	2	1	1	1	1	1	2	1	2	1	2	2	2	2	2	2	1	2	2	2	2	2	2	1	1	1	1	1	2	1	2	1
O95140;O95140-2	O95140	21;9	21;9	21;9	Mitofusin-2	MFN2	sp|O95140|MFN2_HUMAN Mitofusin-2 OS=Homo sapiens OX=9606 GN=MFN2 PE=1 SV=3	2	21	21	21	11	10	12	15	16	14	11	14	13	14	16	17	14	12	15	14	14	13	11	11	13	11	11	10	12	15	16	14	11	14	13	14	16	17	14	12	15	14
O95147	O95147	2	2	2	Dual specificity protein phosphatase 14	DUSP14	sp|O95147|DUS14_HUMAN Dual specificity protein phosphatase 14 OS=Homo sapiens OX=9606 GN=DUSP14 PE=1 SV=1	1	2	2	2	1	1	2	2	2	1	2	2	2	2	1	1	0	0	1	1	0	0	2	2	0	0	1	1	2	2	2	1	2	2	2	2	1	1	0	0	1	1
O95149	O95149	2	2	2	Snurportin-1	SNUPN	sp|O95149|SPN1_HUMAN Snurportin-1 OS=Homo sapiens OX=9606 GN=SNUPN PE=1 SV=1	1	2	2	2	1	0	2	2	2	2	2	2	1	2	2	2	1	1	1	1	0	1	1	1	1	1	1	0	2	2	2	2	2	2	1	2	2	2	1	1	1	1
O95153-2;O95153;O95153-3	O95153-2;O95153;O95153-3	2;2;2	2;2;2	2;2;2	Peripheral-type benzodiazepine receptor-associated protein 1	BZRAP1	sp|O95153-2|RIMB1_HUMAN Isoform 2 of Peripheral-type benzodiazepine receptor-associated protein 1 OS=Homo sapiens OX=9606 GN=TSPOAP1;sp|O95153|RIMB1_HUMAN Peripheral-type benzodiazepine receptor-associated protein 1 OS=Homo sapiens OX=9606 GN=TSPOAP1 PE=1	3	2	2	2	0	0	1	1	1	1	2	1	1	1	1	1	1	1	1	0	0	0	1	1	0	0	0	0	1	1	1	1	2	1	1	1	1	1	1	1	1	0
O95155-2;O95155;O95155-4;O95155-3	O95155-2;O95155;O95155-4;O95155-3	21;21;21;15	21;21;21;15	21;21;21;15	Ubiquitin conjugation factor E4 B	UBE4B	sp|O95155-2|UBE4B_HUMAN Isoform 2 of Ubiquitin conjugation factor E4 B OS=Homo sapiens OX=9606 GN=UBE4B;sp|O95155|UBE4B_HUMAN Ubiquitin conjugation factor E4 B OS=Homo sapiens OX=9606 GN=UBE4B PE=1 SV=1;sp|O95155-4|UBE4B_HUMAN Isoform 4 of Ubiquitin conjug	4	21	21	21	6	7	12	12	11	11	12	13	10	12	16	13	13	10	10	6	8	9	11	12	11	10	6	7	12	12	11	11	12	13	10	12	16	13	13	10	10	6
O95159	O95159	9	9	9	Zinc finger protein-like 1	ZFPL1	sp|O95159|ZFPL1_HUMAN Zinc finger protein-like 1 OS=Homo sapiens OX=9606 GN=ZFPL1 PE=1 SV=2	1	9	9	9	3	3	6	6	6	7	7	7	6	5	6	6	6	6	6	6	5	5	6	6	2	2	3	3	6	6	6	7	7	7	6	5	6	6	6	6	6	6
O95163	O95163	36	36	36	Elongator complex protein 1	IKBKAP	sp|O95163|ELP1_HUMAN Elongator complex protein 1 OS=Homo sapiens OX=9606 GN=ELP1 PE=1 SV=3	1	36	36	36	21	18	18	16	22	18	18	17	18	16	30	27	21	16	27	25	16	23	15	14	16	13	21	18	18	16	22	18	18	17	18	16	30	27	21	16	27	25
O95164	O95164	1	1	1	Ubiquitin-like protein 3	UBL3	sp|O95164|UBL3_HUMAN Ubiquitin-like protein 3 OS=Homo sapiens OX=9606 GN=UBL3 PE=1 SV=1	1	1	1	1	0	0	0	1	0	0	1	0	1	1	0	1	0	1	0	0	0	0	1	1	0	0	0	0	0	1	0	0	1	0	1	1	0	1	0	1	0	0
O95166	O95166	4	3	3	Gamma-aminobutyric acid receptor-associated protein	GABARAP	sp|O95166|GBRAP_HUMAN Gamma-aminobutyric acid receptor-associated protein OS=Homo sapiens OX=9606 GN=GABARAP PE=1 SV=1	1	4	3	3	2	2	3	3	4	4	4	4	2	4	2	3	4	3	1	1	0	2	3	3	2	2	2	2	3	3	3	3	3	3	2	3	2	2	3	3	1	1
O95167	O95167	2	2	2	NADH dehydrogenase [ubiquinone] 1 alpha subcomplex subunit 3	NDUFA3	sp|O95167|NDUA3_HUMAN NADH dehydrogenase [ubiquinone] 1 alpha subcomplex subunit 3 OS=Homo sapiens OX=9606 GN=NDUFA3 PE=1 SV=1	1	2	2	2	0	0	1	1	1	1	1	1	1	1	1	1	1	1	1	1	2	1	1	1	1	1	0	0	1	1	1	1	1	1	1	1	1	1	1	1	1	1
O95168;O95168-2	O95168;O95168-2	5;4	5;4	5;4	NADH dehydrogenase [ubiquinone] 1 beta subcomplex subunit 4	NDUFB4	sp|O95168|NDUB4_HUMAN NADH dehydrogenase [ubiquinone] 1 beta subcomplex subunit 4 OS=Homo sapiens OX=9606 GN=NDUFB4 PE=1 SV=3;sp|O95168-2|NDUB4_HUMAN Isoform 2 of NADH dehydrogenase [ubiquinone] 1 beta subcomplex subunit 4 OS=Homo sapiens OX=9606 GN=NDUFB4	2	5	5	5	4	5	3	4	5	4	4	4	5	5	5	5	2	2	5	4	4	4	4	4	4	4	4	5	3	4	5	4	4	4	5	5	5	5	2	2	5	4
O95169-3;O95169;O95169-2	O95169-3;O95169;O95169-2	7;7;5	7;7;5	7;7;5	NADH dehydrogenase [ubiquinone] 1 beta subcomplex subunit 8, mitochondrial	NDUFB8	sp|O95169-3|NDUB8_HUMAN Isoform 3 of NADH dehydrogenase [ubiquinone] 1 beta subcomplex subunit 8, mitochondrial OS=Homo sapiens OX=9606 GN=NDUFB8;sp|O95169|NDUB8_HUMAN NADH dehydrogenase [ubiquinone] 1 beta subcomplex subunit 8, mitochondrial OS=Homo sapie	3	7	7	7	5	5	4	3	2	2	2	2	2	2	5	5	2	2	5	5	1	3	3	3	3	3	5	5	4	3	2	2	2	2	2	2	5	5	2	2	5	5
O95182	O95182	4	4	4	NADH dehydrogenase [ubiquinone] 1 alpha subcomplex subunit 7	NDUFA7	sp|O95182|NDUA7_HUMAN NADH dehydrogenase [ubiquinone] 1 alpha subcomplex subunit 7 OS=Homo sapiens OX=9606 GN=NDUFA7 PE=1 SV=3	1	4	4	4	2	2	4	4	3	3	4	3	4	3	3	3	4	3	2	3	3	3	3	3	3	3	2	2	4	4	3	3	4	3	4	3	3	3	4	3	2	3
O95197-3;O95197-6;O95197-5	O95197-3	3;1;1	3;1;1	1;1;1	Reticulon-3	RTN3	sp|O95197-3|RTN3_HUMAN Isoform 3 of Reticulon-3 OS=Homo sapiens OX=9606 GN=RTN3	3	3	3	1	3	3	3	3	3	3	3	3	3	3	3	3	3	3	3	3	3	3	3	3	2	2	3	3	3	3	3	3	3	3	3	3	3	3	3	3	3	3
O95202;O95202-2;O95202-3	O95202	18;1;1	18;1;1	18;1;1	LETM1 and EF-hand domain-containing protein 1, mitochondrial	LETM1	sp|O95202|LETM1_HUMAN Mitochondrial proton/calcium exchanger protein OS=Homo sapiens OX=9606 GN=LETM1 PE=1 SV=1	3	18	18	18	9	10	11	11	12	9	13	9	8	9	12	12	8	11	11	13	8	8	10	10	14	16	9	10	11	11	12	9	13	9	8	9	12	12	8	11	11	13
O95210	O95210	3	3	3	Starch-binding domain-containing protein 1	STBD1	sp|O95210|STBD1_HUMAN Starch-binding domain-containing protein 1 OS=Homo sapiens OX=9606 GN=STBD1 PE=1 SV=1	1	3	3	3	0	0	2	3	3	2	3	2	2	2	3	3	3	3	1	0	0	0	2	2	0	1	0	0	2	3	3	2	3	2	2	2	3	3	3	3	1	0
O95218-2;O95218	O95218-2;O95218	7;7	7;7	7;7	Zinc finger Ran-binding domain-containing protein 2	ZRANB2	sp|O95218-2|ZRAB2_HUMAN Isoform 2 of Zinc finger Ran-binding domain-containing protein 2 OS=Homo sapiens OX=9606 GN=ZRANB2;sp|O95218|ZRAB2_HUMAN Zinc finger Ran-binding domain-containing protein 2 OS=Homo sapiens OX=9606 GN=ZRANB2 PE=1 SV=2	2	7	7	7	4	5	3	3	3	2	0	2	3	2	4	3	2	2	5	5	5	5	2	1	3	3	4	5	3	3	3	2	0	2	3	2	4	3	2	2	5	5
O95219;O95219-2	O95219;O95219-2	18;13	18;13	18;13	Sorting nexin-4	SNX4	sp|O95219|SNX4_HUMAN Sorting nexin-4 OS=Homo sapiens OX=9606 GN=SNX4 PE=1 SV=1;sp|O95219-2|SNX4_HUMAN Isoform 2 of Sorting nexin-4 OS=Homo sapiens OX=9606 GN=SNX4	2	18	18	18	6	5	13	11	12	12	10	10	11	10	13	14	12	10	10	7	5	7	10	12	13	12	6	5	13	11	12	12	10	10	11	10	13	14	12	10	10	7
O95229-2;O95229	O95229-2;O95229	2;2	2;2	2;2	ZW10 interactor	ZWINT	sp|O95229-2|ZWINT_HUMAN Isoform 2 of ZW10 interactor OS=Homo sapiens OX=9606 GN=ZWINT;sp|O95229|ZWINT_HUMAN ZW10 interactor OS=Homo sapiens OX=9606 GN=ZWINT PE=1 SV=2	2	2	2	2	1	0	2	1	1	2	2	1	1	2	1	1	0	2	1	1	1	2	1	2	2	1	1	0	2	1	1	2	2	1	1	2	1	1	0	2	1	1
O95232;O95232-2	O95232	12;2	12;2	12;2	Luc7-like protein 3	LUC7L3	sp|O95232|LC7L3_HUMAN Luc7-like protein 3 OS=Homo sapiens OX=9606 GN=LUC7L3 PE=1 SV=2	2	12	12	12	6	7	11	9	10	9	9	9	9	10	8	9	9	8	9	8	10	10	10	10	9	8	6	7	11	9	10	9	9	9	9	10	8	9	9	8	9	8
O95235-2;O95235	O95235-2;O95235	9;9	9;9	9;9	Kinesin-like protein KIF20A	KIF20A	sp|O95235-2|KI20A_HUMAN Isoform 2 of Kinesin-like protein KIF20A OS=Homo sapiens OX=9606 GN=KIF20A;sp|O95235|KI20A_HUMAN Kinesin-like protein KIF20A OS=Homo sapiens OX=9606 GN=KIF20A PE=1 SV=1	2	9	9	9	0	0	5	2	4	4	2	2	3	4	3	4	5	5	1	1	0	4	4	3	2	1	0	0	5	2	4	4	2	2	3	4	3	4	5	5	1	1
O95239;O95239-2;Q2VIQ3	O95239;O95239-2	31;24;8	31;24;8	31;24;8	Chromosome-associated kinesin KIF4A	KIF4A	sp|O95239|KIF4A_HUMAN Chromosome-associated kinesin KIF4A OS=Homo sapiens OX=9606 GN=KIF4A PE=1 SV=3;sp|O95239-2|KIF4A_HUMAN Isoform 2 of Chromosome-associated kinesin KIF4A OS=Homo sapiens OX=9606 GN=KIF4A	3	31	31	31	12	12	21	20	16	17	17	16	15	11	26	25	18	14	20	14	18	12	14	15	17	19	12	12	21	20	16	17	17	16	15	11	26	25	18	14	20	14
O95248;O95248-5;O95248-4	O95248;O95248-5;O95248-4	7;7;7	7;7;7	7;7;7	Myotubularin-related protein 5	SBF1	sp|O95248|MTMR5_HUMAN Myotubularin-related protein 5 OS=Homo sapiens OX=9606 GN=SBF1 PE=1 SV=4;sp|O95248-5|MTMR5_HUMAN Isoform 5 of Myotubularin-related protein 5 OS=Homo sapiens OX=9606 GN=SBF1;sp|O95248-4|MTMR5_HUMAN Isoform 4 of Myotubularin-related pro	3	7	7	7	2	1	4	4	3	4	2	3	4	4	4	3	5	5	2	4	3	4	3	3	3	3	2	1	4	4	3	4	2	3	4	4	4	3	5	5	2	4
O95249;O95249-2	O95249;O95249-2	5;3	5;3	5;3	Golgi SNAP receptor complex member 1	GOSR1	sp|O95249|GOSR1_HUMAN Golgi SNAP receptor complex member 1 OS=Homo sapiens OX=9606 GN=GOSR1 PE=1 SV=1;sp|O95249-2|GOSR1_HUMAN Isoform 2 of Golgi SNAP receptor complex member 1 OS=Homo sapiens OX=9606 GN=GOSR1	2	5	5	5	1	1	3	2	3	4	4	4	2	4	3	2	3	3	2	0	2	3	5	4	3	3	1	1	3	2	3	4	4	4	2	4	3	2	3	3	2	0
O95251-4;O95251;O95251-3;O95251-5;O95251-2	O95251-4;O95251;O95251-3;O95251-5;O95251-2	5;5;4;4;4	5;5;4;4;4	5;5;4;4;4	Histone acetyltransferase KAT7	KAT7	sp|O95251-4|KAT7_HUMAN Isoform 4 of Histone acetyltransferase KAT7 OS=Homo sapiens OX=9606 GN=KAT7;sp|O95251|KAT7_HUMAN Histone acetyltransferase KAT7 OS=Homo sapiens OX=9606 GN=KAT7 PE=1 SV=1;sp|O95251-3|KAT7_HUMAN Isoform 3 of Histone acetyltransferase K	5	5	5	5	0	0	3	4	3	4	2	2	2	2	2	4	4	2	1	1	0	2	3	3	1	2	0	0	3	4	3	4	2	2	2	2	2	4	4	2	1	1
O95260-2;O95260	O95260-2;O95260	3;3	3;3	3;3	Arginyl-tRNA--protein transferase 1	ATE1	sp|O95260-2|ATE1_HUMAN Isoform ATE1-2 of Arginyl-tRNA--protein transferase 1 OS=Homo sapiens OX=9606 GN=ATE1;sp|O95260|ATE1_HUMAN Arginyl-tRNA--protein transferase 1 OS=Homo sapiens OX=9606 GN=ATE1 PE=1 SV=2	2	3	3	3	0	0	1	1	2	1	2	2	2	2	0	1	2	2	0	0	1	0	2	2	0	1	0	0	1	1	2	1	2	2	2	2	0	1	2	2	0	0
O95273-2;O95273	O95273-2;O95273	1;1	1;1	1;1	Cyclin-D1-binding protein 1	CCNDBP1	sp|O95273-2|CCDB1_HUMAN Isoform 2 of Cyclin-D1-binding protein 1 OS=Homo sapiens OX=9606 GN=CCNDBP1;sp|O95273|CCDB1_HUMAN Cyclin-D1-binding protein 1 OS=Homo sapiens OX=9606 GN=CCNDBP1 PE=1 SV=2	2	1	1	1	1	0	1	1	1	1	0	1	1	1	1	1	1	1	0	1	1	1	1	1	1	1	1	0	1	1	1	1	0	1	1	1	1	1	1	1	0	1
O95292;O95292-2	O95292	14;5	13;4	13;4	Vesicle-associated membrane protein-associated protein B/C	VAPB	sp|O95292|VAPB_HUMAN Vesicle-associated membrane protein-associated protein B/C OS=Homo sapiens OX=9606 GN=VAPB PE=1 SV=3	2	14	13	13	13	10	12	11	11	11	11	11	11	11	13	14	12	12	11	11	7	10	11	10	12	12	13	10	12	11	11	11	11	11	11	11	12	13	11	11	11	10
O95295	O95295	4	4	4	SNARE-associated protein Snapin	SNAPIN	sp|O95295|SNAPN_HUMAN SNARE-associated protein Snapin OS=Homo sapiens OX=9606 GN=SNAPIN PE=1 SV=1	1	4	4	4	2	0	2	2	2	2	2	2	2	3	2	2	3	3	2	2	2	2	2	2	1	1	2	0	2	2	2	2	2	2	2	3	2	2	3	3	2	2
O95297-4;O95297-2;O95297;O95297-3	O95297-4;O95297-2;O95297;O95297-3	2;2;2;1	2;2;2;1	2;2;2;1	Myelin protein zero-like protein 1	MPZL1	sp|O95297-4|MPZL1_HUMAN Isoform 4 of Myelin protein zero-like protein 1 OS=Homo sapiens OX=9606 GN=MPZL1;sp|O95297-2|MPZL1_HUMAN Isoform 2 of Myelin protein zero-like protein 1 OS=Homo sapiens OX=9606 GN=MPZL1;sp|O95297|MPZL1_HUMAN Myelin protein zero-like	4	2	2	2	0	0	0	2	1	0	1	1	1	1	1	0	0	1	0	0	0	0	0	1	0	0	0	0	0	2	1	0	1	1	1	1	1	0	0	1	0	0
O95298-2;O95298;E9PQ53	O95298-2;O95298	3;3;1	3;3;1	3;3;1	NADH dehydrogenase [ubiquinone] 1 subunit C2	NDUFC2	sp|O95298-2|NDUC2_HUMAN Isoform 4 of NADH dehydrogenase [ubiquinone] 1 subunit C2 OS=Homo sapiens OX=9606 GN=NDUFC2;sp|O95298|NDUC2_HUMAN NADH dehydrogenase [ubiquinone] 1 subunit C2 OS=Homo sapiens OX=9606 GN=NDUFC2 PE=1 SV=1	3	3	3	3	3	2	3	3	2	2	2	3	3	3	3	3	3	2	3	2	2	2	3	3	3	2	3	2	3	3	2	2	2	3	3	3	3	3	3	2	3	2
O95299;O95299-2	O95299;O95299-2	12;10	12;10	12;10	NADH dehydrogenase [ubiquinone] 1 alpha subcomplex subunit 10, mitochondrial	NDUFA10	sp|O95299|NDUAA_HUMAN NADH dehydrogenase [ubiquinone] 1 alpha subcomplex subunit 10, mitochondrial OS=Homo sapiens OX=9606 GN=NDUFA10 PE=1 SV=1;sp|O95299-2|NDUAA_HUMAN Isoform 2 of NADH dehydrogenase [ubiquinone] 1 alpha subcomplex subunit 10, mitochondria	2	12	12	12	6	6	6	8	7	8	7	5	6	7	10	9	5	6	5	6	8	5	7	7	8	7	6	6	6	8	7	8	7	5	6	7	10	9	5	6	5	6
O95302;O95302-3;O95302-2;Q75LS8	O95302;O95302-3	8;7;2;1	8;7;2;1	8;7;2;1	Peptidyl-prolyl cis-trans isomerase FKBP9	FKBP9	sp|O95302|FKBP9_HUMAN Peptidyl-prolyl cis-trans isomerase FKBP9 OS=Homo sapiens OX=9606 GN=FKBP9 PE=1 SV=2;sp|O95302-3|FKBP9_HUMAN Isoform 3 of Peptidyl-prolyl cis-trans isomerase FKBP9 OS=Homo sapiens OX=9606 GN=FKBP9	4	8	8	8	4	3	5	4	5	6	6	5	4	5	5	5	4	4	7	5	6	4	4	3	4	4	4	3	5	4	5	6	6	5	4	5	5	5	4	4	7	5
O95319-5;O95319-2;O95319;O95319-4;O95319-3	O95319-5;O95319-2;O95319;O95319-4;O95319-3	16;16;16;16;16	16;16;16;16;16	12;12;12;12;12	CUGBP Elav-like family member 2	CELF2	sp|O95319-5|CELF2_HUMAN Isoform 5 of CUGBP Elav-like family member 2 OS=Homo sapiens OX=9606 GN=CELF2;sp|O95319-2|CELF2_HUMAN Isoform 2 of CUGBP Elav-like family member 2 OS=Homo sapiens OX=9606 GN=CELF2;sp|O95319|CELF2_HUMAN CUGBP Elav-like family member	5	16	16	12	13	13	12	11	11	11	10	12	10	10	13	14	12	12	15	13	13	13	10	12	10	10	13	13	12	11	11	11	10	12	10	10	13	14	12	12	15	13
O95336	O95336	12	12	12	6-phosphogluconolactonase	PGLS	sp|O95336|6PGL_HUMAN 6-phosphogluconolactonase OS=Homo sapiens OX=9606 GN=PGLS PE=1 SV=2	1	12	12	12	11	12	8	6	6	7	6	6	3	5	10	10	8	9	12	11	11	11	3	5	11	8	11	12	8	6	6	7	6	6	3	5	10	10	8	9	12	11
O95340;O95340-2	O95340;O95340-2	17;17	16;16	16;16	Bifunctional 3-phosphoadenosine 5-phosphosulfate synthase 2;Sulfate adenylyltransferase;Adenylyl-sulfate kinase	PAPSS2	sp|O95340|PAPS2_HUMAN Bifunctional 3-phosphoadenosine 5-phosphosulfate synthase 2 OS=Homo sapiens OX=9606 GN=PAPSS2 PE=1 SV=2;sp|O95340-2|PAPS2_HUMAN Isoform B of Bifunctional 3-phosphoadenosine 5-phosphosulfate synthase 2 OS=Homo sapiens OX=9606 GN=PA	2	17	16	16	10	7	10	10	9	9	8	9	9	9	12	12	11	10	9	12	5	8	8	9	9	8	10	7	10	10	9	9	8	9	9	9	11	12	11	10	9	11
O95347;O95347-2	O95347;O95347-2	65;63	65;63	65;63	Structural maintenance of chromosomes protein 2	SMC2	sp|O95347|SMC2_HUMAN Structural maintenance of chromosomes protein 2 OS=Homo sapiens OX=9606 GN=SMC2 PE=1 SV=2;sp|O95347-2|SMC2_HUMAN Isoform 2 of Structural maintenance of chromosomes protein 2 OS=Homo sapiens OX=9606 GN=SMC2	2	65	65	65	45	40	44	38	40	41	42	41	45	39	46	47	38	41	43	39	44	44	43	39	47	45	45	40	44	38	40	41	42	41	45	39	46	47	38	41	43	39
O95363	O95363	2	2	2	Phenylalanine--tRNA ligase, mitochondrial	FARS2	sp|O95363|SYFM_HUMAN Phenylalanine--tRNA ligase, mitochondrial OS=Homo sapiens OX=9606 GN=FARS2 PE=1 SV=1	1	2	2	2	1	1	1	1	1	1	1	1	1	1	1	1	1	1	1	1	2	1	1	1	1	1	1	1	1	1	1	1	1	1	1	1	1	1	1	1	1	1
O95365	O95365	4	4	4	Zinc finger and BTB domain-containing protein 7A	ZBTB7A	sp|O95365|ZBT7A_HUMAN Zinc finger and BTB domain-containing protein 7A OS=Homo sapiens OX=9606 GN=ZBTB7A PE=1 SV=1	1	4	4	4	2	1	3	3	3	4	3	3	3	3	3	4	3	3	2	3	2	3	3	3	3	3	2	1	3	3	3	4	3	3	3	3	3	4	3	3	2	3
O95372	O95372	13	13	13	Acyl-protein thioesterase 2	LYPLA2	sp|O95372|LYPA2_HUMAN Acyl-protein thioesterase 2 OS=Homo sapiens OX=9606 GN=LYPLA2 PE=1 SV=1	1	13	13	13	10	11	9	6	5	7	8	7	9	8	9	8	7	7	9	9	8	9	8	7	10	9	10	11	9	6	5	7	8	7	9	8	9	8	7	7	9	9
O95373	O95373	35	35	34	Importin-7	IPO7	sp|O95373|IPO7_HUMAN Importin-7 OS=Homo sapiens OX=9606 GN=IPO7 PE=1 SV=1	1	35	35	34	21	19	21	21	22	21	21	21	20	20	24	24	25	22	23	23	22	24	21	22	21	18	21	19	21	21	22	21	21	21	20	20	24	24	25	22	23	23
O95376	O95376	7	7	7	E3 ubiquitin-protein ligase ARIH2	ARIH2	sp|O95376|ARI2_HUMAN E3 ubiquitin-protein ligase ARIH2 OS=Homo sapiens OX=9606 GN=ARIH2 PE=1 SV=1	1	7	7	7	1	1	5	5	6	6	5	5	5	5	6	5	6	6	2	2	0	2	6	7	4	3	1	1	5	5	6	6	5	5	5	5	6	5	6	6	2	2
O95379-3;O95379-2;O95379;O95379-4	O95379-3;O95379-2;O95379;O95379-4	1;1;1;1	1;1;1;1	1;1;1;1	Tumor necrosis factor alpha-induced protein 8	TNFAIP8	sp|O95379-3|TFIP8_HUMAN Isoform 3 of Tumor necrosis factor alpha-induced protein 8 OS=Homo sapiens OX=9606 GN=TNFAIP8;sp|O95379-2|TFIP8_HUMAN Isoform 2 of Tumor necrosis factor alpha-induced protein 8 OS=Homo sapiens OX=9606 GN=TNFAIP8;sp|O95379|TFIP8_HUMA	4	1	1	1	0	0	1	0	1	1	1	1	0	1	0	0	1	1	0	0	0	0	1	1	0	0	0	0	1	0	1	1	1	1	0	1	0	0	1	1	0	0
O95382-2;O95382-3;O95382	O95382-2;O95382-3;O95382	2;2;2	2;2;2	2;2;2	Mitogen-activated protein kinase kinase kinase 6	MAP3K6	sp|O95382-2|M3K6_HUMAN Isoform 2 of Mitogen-activated protein kinase kinase kinase 6 OS=Homo sapiens OX=9606 GN=MAP3K6;sp|O95382-3|M3K6_HUMAN Isoform 3 of Mitogen-activated protein kinase kinase kinase 6 OS=Homo sapiens OX=9606 GN=MAP3K6;sp|O95382|M3K6_HUM	3	2	2	2	0	0	1	1	0	1	1	1	0	0	0	1	1	0	0	0	2	1	0	1	1	1	0	0	1	1	0	1	1	1	0	0	0	1	1	0	0	0
O95391	O95391	2	2	2	Pre-mRNA-splicing factor SLU7	SLU7	sp|O95391|SLU7_HUMAN Pre-mRNA-splicing factor SLU7 OS=Homo sapiens OX=9606 GN=SLU7 PE=1 SV=2	1	2	2	2	1	1	0	0	0	1	1	0	2	1	1	1	0	1	1	1	1	1	1	2	0	0	1	1	0	0	0	1	1	0	2	1	1	1	0	1	1	1
O95394;O95394-3;O95394-4	O95394;O95394-3;O95394-4	15;15;15	15;15;15	15;15;15	Phosphoacetylglucosamine mutase	PGM3	sp|O95394|AGM1_HUMAN Phosphoacetylglucosamine mutase OS=Homo sapiens OX=9606 GN=PGM3 PE=1 SV=1;sp|O95394-3|AGM1_HUMAN Isoform 2 of Phosphoacetylglucosamine mutase OS=Homo sapiens OX=9606 GN=PGM3;sp|O95394-4|AGM1_HUMAN Isoform 3 of Phosphoacetylglucosamine	3	15	15	15	10	8	10	11	10	10	11	10	9	10	11	13	8	7	13	8	6	6	10	8	9	8	10	8	10	11	10	10	11	10	9	10	11	13	8	7	13	8
O95396	O95396	4	4	4	Adenylyltransferase and sulfurtransferase MOCS3;Molybdopterin-synthase adenylyltransferase;Molybdopterin-synthase sulfurtransferase	MOCS3	sp|O95396|MOCS3_HUMAN Adenylyltransferase and sulfurtransferase MOCS3 OS=Homo sapiens OX=9606 GN=MOCS3 PE=1 SV=1	1	4	4	4	2	1	2	1	2	1	1	1	0	1	3	3	3	2	1	2	2	2	1	1	1	2	2	1	2	1	2	1	1	1	0	1	3	3	3	2	1	2
O95400	O95400	7	7	7	CD2 antigen cytoplasmic tail-binding protein 2	CD2BP2	sp|O95400|CD2B2_HUMAN CD2 antigen cytoplasmic tail-binding protein 2 OS=Homo sapiens OX=9606 GN=CD2BP2 PE=1 SV=1	1	7	7	7	5	4	3	4	4	4	4	4	2	2	5	4	5	3	3	4	4	3	2	3	5	4	5	4	3	4	4	4	4	4	2	2	5	4	5	3	3	4
O95405-3;O95405-2;O95405	O95405-3;O95405-2;O95405	1;1;1	1;1;1	1;1;1	Zinc finger FYVE domain-containing protein 9	ZFYVE9	sp|O95405-3|ZFYV9_HUMAN Isoform 3 of Zinc finger FYVE domain-containing protein 9 OS=Homo sapiens OX=9606 GN=ZFYVE9;sp|O95405-2|ZFYV9_HUMAN Isoform 2 of Zinc finger FYVE domain-containing protein 9 OS=Homo sapiens OX=9606 GN=ZFYVE9;sp|O95405|ZFYV9_HUMAN Zi	3	1	1	1	0	0	0	0	1	1	0	0	0	0	0	0	0	0	0	0	0	0	0	0	0	0	0	0	0	0	1	1	0	0	0	0	0	0	0	0	0	0
O95425-2;O95425-4;O95425-3;O95425	O95425-2;O95425-4;O95425-3;O95425	21;21;21;21	21;21;21;21	21;21;21;21	Supervillin	SVIL	sp|O95425-2|SVIL_HUMAN Isoform 2 of Supervillin OS=Homo sapiens OX=9606 GN=SVIL;sp|O95425-4|SVIL_HUMAN Isoform SV4 of Supervillin OS=Homo sapiens OX=9606 GN=SVIL;sp|O95425-3|SVIL_HUMAN Isoform SV3 of Supervillin OS=Homo sapiens OX=9606 GN=SVIL;sp|O95425|SV	4	21	21	21	2	2	8	10	6	9	10	8	8	8	10	9	6	5	7	4	5	10	8	9	9	11	2	2	8	10	6	9	10	8	8	8	10	9	6	5	7	4
O95433;O95433-2	O95433;O95433-2	19;15	19;15	19;15	Activator of 90 kDa heat shock protein ATPase homolog 1	AHSA1	sp|O95433|AHSA1_HUMAN Activator of 90 kDa heat shock protein ATPase homolog 1 OS=Homo sapiens OX=9606 GN=AHSA1 PE=1 SV=1;sp|O95433-2|AHSA1_HUMAN Isoform 2 of Activator of 90 kDa heat shock protein ATPase homolog 1 OS=Homo sapiens OX=9606 GN=AHSA1	2	19	19	19	16	15	15	13	14	14	13	15	9	13	13	14	12	11	13	15	11	11	12	13	16	17	16	15	15	13	14	14	13	15	9	13	13	14	12	11	13	15
O95453-2;O95453;O95453-3;O95453-4	O95453-2;O95453;O95453-3;O95453-4	11;11;10;7	11;11;10;7	11;11;10;7	Poly(A)-specific ribonuclease PARN	PARN	sp|O95453-2|PARN_HUMAN Isoform 2 of Poly(A)-specific ribonuclease PARN OS=Homo sapiens OX=9606 GN=PARN;sp|O95453|PARN_HUMAN Poly(A)-specific ribonuclease PARN OS=Homo sapiens OX=9606 GN=PARN PE=1 SV=1;sp|O95453-3|PARN_HUMAN Isoform 3 of Poly(A)-specific ri	4	11	11	11	5	5	7	9	7	7	6	7	7	5	8	8	7	8	6	6	4	6	4	4	6	4	5	5	7	9	7	7	6	7	7	5	8	8	7	8	6	6
O95456-2;O95456	O95456-2;O95456	9;9	9;9	9;9	Proteasome assembly chaperone 1	PSMG1	sp|O95456-2|PSMG1_HUMAN Isoform 2 of Proteasome assembly chaperone 1 OS=Homo sapiens OX=9606 GN=PSMG1;sp|O95456|PSMG1_HUMAN Proteasome assembly chaperone 1 OS=Homo sapiens OX=9606 GN=PSMG1 PE=1 SV=1	2	9	9	9	3	3	5	5	4	5	5	4	4	5	6	6	4	5	5	3	6	6	6	4	3	4	3	3	5	5	4	5	5	4	4	5	6	6	4	5	5	3
O95478	O95478	8	8	8	Ribosome biogenesis protein NSA2 homolog	NSA2	sp|O95478|NSA2_HUMAN Ribosome biogenesis protein NSA2 homolog OS=Homo sapiens OX=9606 GN=NSA2 PE=1 SV=1	1	8	8	8	5	4	6	5	5	5	5	5	4	5	6	7	4	4	6	4	4	6	5	5	7	7	5	4	6	5	5	5	5	5	4	5	6	7	4	4	6	4
O95479;O95479-2	O95479;O95479-2	7;7	7;7	7;7	GDH/6PGL endoplasmic bifunctional protein;Glucose 1-dehydrogenase;6-phosphogluconolactonase	H6PD	sp|O95479|G6PE_HUMAN GDH/6PGL endoplasmic bifunctional protein OS=Homo sapiens OX=9606 GN=H6PD PE=1 SV=2;sp|O95479-2|G6PE_HUMAN Isoform 2 of GDH/6PGL endoplasmic bifunctional protein OS=Homo sapiens OX=9606 GN=H6PD	2	7	7	7	1	0	3	6	6	6	5	6	5	4	1	5	4	3	1	1	0	0	4	3	2	2	1	0	3	6	6	6	5	6	5	4	1	5	4	3	1	1
O95486;O95486-2	O95486	15;6	15;6	15;6	Protein transport protein Sec24A	SEC24A	sp|O95486|SC24A_HUMAN Protein transport protein Sec24A OS=Homo sapiens OX=9606 GN=SEC24A PE=1 SV=2	2	15	15	15	6	7	8	8	8	6	6	8	6	5	12	14	6	6	9	8	6	7	7	8	9	9	6	7	8	8	8	6	6	8	6	5	12	14	6	6	9	8
O95487-2;O95487;O95487-3	O95487-2;O95487;O95487-3	7;7;7	7;7;7	7;7;7	Protein transport protein Sec24B	SEC24B	sp|O95487-2|SC24B_HUMAN Isoform 2 of Protein transport protein Sec24B OS=Homo sapiens OX=9606 GN=SEC24B;sp|O95487|SC24B_HUMAN Protein transport protein Sec24B OS=Homo sapiens OX=9606 GN=SEC24B PE=1 SV=2;sp|O95487-3|SC24B_HUMAN Isoform 3 of Protein transpor	3	7	7	7	5	4	7	7	7	7	6	7	7	6	7	5	4	6	4	4	5	6	5	6	6	5	5	4	7	7	7	7	6	7	7	6	7	5	4	6	4	4
O95503	O95503	1	1	1	Chromobox protein homolog 6	CBX6	sp|O95503|CBX6_HUMAN Chromobox protein homolog 6 OS=Homo sapiens OX=9606 GN=CBX6 PE=1 SV=1	1	1	1	1	0	0	1	1	1	1	1	1	1	1	0	1	0	1	0	0	0	0	1	1	0	1	0	0	1	1	1	1	1	1	1	1	0	1	0	1	0	0
O95544-3;O95544;O95544-2	O95544-3;O95544;O95544-2	1;1;1	1;1;1	1;1;1	NAD kinase	NADK	sp|O95544-3|NADK_HUMAN Isoform 3 of NAD kinase OS=Homo sapiens OX=9606 GN=NADK;sp|O95544|NADK_HUMAN NAD kinase OS=Homo sapiens OX=9606 GN=NADK PE=1 SV=1;sp|O95544-2|NADK_HUMAN Isoform 2 of NAD kinase OS=Homo sapiens OX=9606 GN=NADK	3	1	1	1	0	0	0	0	0	0	0	0	0	0	0	0	0	0	0	0	1	0	0	0	0	0	0	0	0	0	0	0	0	0	0	0	0	0	0	0	0	0
O95551-2;O95551;O95551-3	O95551-2;O95551;O95551-3	4;4;3	4;4;3	3;3;2	Tyrosyl-DNA phosphodiesterase 2	TDP2	sp|O95551-2|TYDP2_HUMAN Isoform 2 of Tyrosyl-DNA phosphodiesterase 2 OS=Homo sapiens OX=9606 GN=TDP2;sp|O95551|TYDP2_HUMAN Tyrosyl-DNA phosphodiesterase 2 OS=Homo sapiens OX=9606 GN=TDP2 PE=1 SV=1;sp|O95551-3|TYDP2_HUMAN Isoform 3 of Tyrosyl-DNA phosphodie	3	4	4	3	1	1	3	3	3	3	2	2	3	3	2	2	2	3	1	1	1	1	2	2	3	3	1	1	3	3	3	3	2	2	3	3	2	2	2	3	1	1
O95563	O95563	4	4	4	Mitochondrial pyruvate carrier 2	MPC2	sp|O95563|MPC2_HUMAN Mitochondrial pyruvate carrier 2 OS=Homo sapiens OX=9606 GN=MPC2 PE=1 SV=1	1	4	4	4	0	0	2	2	2	2	1	2	3	2	4	4	4	4	1	2	2	2	1	1	0	1	0	0	2	2	2	2	1	2	3	2	4	4	4	4	1	2
O95571	O95571	10	10	10	Persulfide dioxygenase ETHE1, mitochondrial	ETHE1	sp|O95571|ETHE1_HUMAN Persulfide dioxygenase ETHE1, mitochondrial OS=Homo sapiens OX=9606 GN=ETHE1 PE=1 SV=2	1	10	10	10	8	7	6	5	6	6	5	6	6	5	6	7	5	4	8	7	7	6	5	5	7	6	8	7	6	5	6	6	5	6	6	5	6	7	5	4	8	7
O95573	O95573	39	39	35	Long-chain-fatty-acid--CoA ligase 3	ACSL3	sp|O95573|ACSL3_HUMAN Long-chain-fatty-acid--CoA ligase 3 OS=Homo sapiens OX=9606 GN=ACSL3 PE=1 SV=3	1	39	39	35	31	31	30	29	24	26	27	26	25	24	32	30	26	24	31	31	30	30	28	27	30	31	31	31	30	29	24	26	27	26	25	24	32	30	26	24	31	31
O95602	O95602	24	24	24	DNA-directed RNA polymerase I subunit RPA1	POLR1A	sp|O95602|RPA1_HUMAN DNA-directed RNA polymerase I subunit RPA1 OS=Homo sapiens OX=9606 GN=POLR1A PE=1 SV=2	1	24	24	24	3	7	8	6	6	8	6	7	6	7	12	11	8	9	4	8	3	8	7	9	7	6	3	7	8	6	6	8	6	7	6	7	12	11	8	9	4	8
O95625	O95625	1	1	1	Zinc finger and BTB domain-containing protein 11	ZBTB11	sp|O95625|ZBT11_HUMAN Zinc finger and BTB domain-containing protein 11 OS=Homo sapiens OX=9606 GN=ZBTB11 PE=1 SV=2	1	1	1	1	0	0	1	1	1	1	1	1	1	1	0	0	0	0	0	0	0	0	1	1	0	0	0	0	1	1	1	1	1	1	1	1	0	0	0	0	0	0
O95628-5;O95628-3;O95628-2;O95628;O95628-8;O95628-4;O95628-7;O95628-9;O95628-10;O95628-6	O95628-5;O95628-3;O95628-2;O95628;O95628-8;O95628-4;O95628-7;O95628-9;O95628-10;O95628-6	1;1;1;1;1;1;1;1;1;1	1;1;1;1;1;1;1;1;1;1	1;1;1;1;1;1;1;1;1;1	CCR4-NOT transcription complex subunit 4	CNOT4	sp|O95628-5|CNOT4_HUMAN Isoform 5 of CCR4-NOT transcription complex subunit 4 OS=Homo sapiens OX=9606 GN=CNOT4;sp|O95628-3|CNOT4_HUMAN Isoform 3 of CCR4-NOT transcription complex subunit 4 OS=Homo sapiens OX=9606 GN=CNOT4;sp|O95628-2|CNOT4_HUMAN Isoform 2	10	1	1	1	0	0	1	1	1	1	1	1	1	1	1	1	1	1	0	0	0	1	0	1	1	1	0	0	1	1	1	1	1	1	1	1	1	1	1	1	0	0
O95630;O95630-2	O95630;O95630-2	10;8	10;8	10;8	STAM-binding protein	STAMBP	sp|O95630|STABP_HUMAN STAM-binding protein OS=Homo sapiens OX=9606 GN=STAMBP PE=1 SV=1;sp|O95630-2|STABP_HUMAN Isoform 2 of STAM-binding protein OS=Homo sapiens OX=9606 GN=STAMBP	2	10	10	10	5	3	8	6	7	6	6	6	7	6	3	6	6	6	6	5	5	4	6	7	6	4	5	3	8	6	7	6	6	6	7	6	3	6	6	6	6	5
O95639-3;O95639-2;O95639	O95639-3;O95639-2;O95639	5;5;5	5;5;5	5;5;5	Cleavage and polyadenylation specificity factor subunit 4	CPSF4	sp|O95639-3|CPSF4_HUMAN Isoform 3 of Cleavage and polyadenylation specificity factor subunit 4 OS=Homo sapiens OX=9606 GN=CPSF4;sp|O95639-2|CPSF4_HUMAN Isoform 2 of Cleavage and polyadenylation specificity factor subunit 4 OS=Homo sapiens OX=9606 GN=CPSF4;	3	5	5	5	0	0	3	4	2	2	4	4	4	3	4	2	3	4	1	0	1	1	5	5	1	1	0	0	3	4	2	2	4	4	4	3	4	2	3	4	1	0
O95671-3;O95671-2;O95671	O95671-3;O95671-2;O95671	3;3;3	3;3;3	3;3;3	N-acetylserotonin O-methyltransferase-like protein	ASMTL	sp|O95671-3|ASML_HUMAN Isoform 3 of Probable bifunctional dTTP/UTP pyrophosphatase/methyltransferase protein OS=Homo sapiens OX=9606 GN=ASMTL;sp|O95671-2|ASML_HUMAN Isoform 2 of Probable bifunctional dTTP/UTP pyrophosphatase/methyltransferase protein OS=Ho	3	3	3	3	0	0	3	2	2	2	3	2	3	3	0	0	0	0	0	0	0	0	1	3	0	1	0	0	3	2	2	2	3	2	3	3	0	0	0	0	0	0
O95674	O95674	4	4	4	Phosphatidate cytidylyltransferase 2	CDS2	sp|O95674|CDS2_HUMAN Phosphatidate cytidylyltransferase 2 OS=Homo sapiens OX=9606 GN=CDS2 PE=1 SV=1	1	4	4	4	0	0	2	1	2	4	2	2	2	2	3	3	3	3	1	1	0	1	3	3	1	1	0	0	2	1	2	4	2	2	2	2	3	3	3	3	1	1
O95677-5;O95677-2;O95677-4;O95677;O95677-3	O95677-5;O95677-2;O95677-4;O95677;O95677-3	4;4;4;4;2	4;4;4;4;2	4;4;4;4;2	Eyes absent homolog 4	EYA4	sp|O95677-5|EYA4_HUMAN Isoform 5 of Eyes absent homolog 4 OS=Homo sapiens OX=9606 GN=EYA4;sp|O95677-2|EYA4_HUMAN Isoform 2 of Eyes absent homolog 4 OS=Homo sapiens OX=9606 GN=EYA4;sp|O95677-4|EYA4_HUMAN Isoform 4 of Eyes absent homolog 4 OS=Homo sapiens OX	5	4	4	4	0	0	1	2	1	2	1	1	1	1	3	3	2	2	1	0	0	1	1	1	1	1	0	0	1	2	1	2	1	1	1	1	3	3	2	2	1	0
O95684-2;O95684	O95684-2;O95684	2;2	2;2	2;2	FGFR1 oncogene partner	FGFR1OP	sp|O95684-2|CEP43_HUMAN Isoform 2 of Centrosomal protein 43 OS=Homo sapiens OX=9606 GN=CEP43;sp|O95684|CEP43_HUMAN Centrosomal protein 43 OS=Homo sapiens OX=9606 GN=CEP43 PE=1 SV=1	2	2	2	2	1	1	0	1	1	1	2	2	1	2	2	1	1	1	0	1	0	1	0	2	1	1	1	1	0	1	1	1	2	2	1	2	2	1	1	1	0	1
O95685	O95685	1	1	1	Protein phosphatase 1 regulatory subunit 3D	PPP1R3D	sp|O95685|PPR3D_HUMAN Protein phosphatase 1 regulatory subunit 3D OS=Homo sapiens OX=9606 GN=PPP1R3D PE=1 SV=1	1	1	1	1	0	1	0	0	0	0	0	0	0	0	1	1	0	0	1	0	1	1	0	0	1	1	0	1	0	0	0	0	0	0	0	0	1	1	0	0	1	0
O95707	O95707	2	2	2	Ribonuclease P protein subunit p29	POP4	sp|O95707|RPP29_HUMAN Ribonuclease P protein subunit p29 OS=Homo sapiens OX=9606 GN=POP4 PE=1 SV=2	1	2	2	2	0	0	0	0	1	1	1	1	1	1	1	1	1	1	0	0	0	0	1	1	0	0	0	0	0	0	1	1	1	1	1	1	1	1	1	1	0	0
O95714	O95714	6	6	6	E3 ubiquitin-protein ligase HERC2	HERC2	sp|O95714|HERC2_HUMAN E3 ubiquitin-protein ligase HERC2 OS=Homo sapiens OX=9606 GN=HERC2 PE=1 SV=2	1	6	6	6	1	0	3	4	4	4	3	4	3	3	3	3	3	3	1	0	0	1	2	2	1	2	1	0	3	4	4	4	3	4	3	3	3	3	3	3	1	0
O95721	O95721	16	16	16	Synaptosomal-associated protein 29	SNAP29	sp|O95721|SNP29_HUMAN Synaptosomal-associated protein 29 OS=Homo sapiens OX=9606 GN=SNAP29 PE=1 SV=1	1	16	16	16	8	10	12	7	10	10	10	9	10	9	13	12	13	11	11	13	9	6	6	8	10	12	8	10	12	7	10	10	10	9	10	9	13	12	13	11	11	13
O95747	O95747	10	10	8	Serine/threonine-protein kinase OSR1	OXSR1	sp|O95747|OXSR1_HUMAN Serine/threonine-protein kinase OSR1 OS=Homo sapiens OX=9606 GN=OXSR1 PE=1 SV=1	1	10	10	8	8	7	7	8	7	7	9	9	7	7	9	8	5	7	9	10	7	9	8	7	5	5	8	7	7	8	7	7	9	9	7	7	9	8	5	7	9	10
O95757	O95757	10	5	5	Heat shock 70 kDa protein 4L	HSPA4L	sp|O95757|HS74L_HUMAN Heat shock 70 kDa protein 4L OS=Homo sapiens OX=9606 GN=HSPA4L PE=1 SV=3	1	10	5	5	6	6	6	7	9	9	8	8	9	6	7	7	6	6	6	5	5	6	9	8	7	6	1	1	3	3	4	5	4	4	5	3	2	2	3	2	1	1
O95758-1;O95758;O95758-5;O95758-4;O95758-7	O95758-1;O95758;O95758-5;O95758-4;O95758-7	19;18;18;18;15	15;14;14;14;12	1;0;0;0;0	Polypyrimidine tract-binding protein 3	PTBP3	sp|O95758-1|PTBP3_HUMAN Isoform 1 of Polypyrimidine tract-binding protein 3 OS=Homo sapiens OX=9606 GN=PTBP3;sp|O95758|PTBP3_HUMAN Polypyrimidine tract-binding protein 3 OS=Homo sapiens OX=9606 GN=PTBP3 PE=1 SV=2;sp|O95758-5|PTBP3_HUMAN Isoform 5 of Polypy	5	19	15	1	9	11	11	10	12	14	11	12	9	11	13	13	12	11	13	11	10	9	9	8	11	14	7	8	10	10	10	11	9	10	8	9	11	11	11	10	11	9
O95758-6;O95758-2	O95758-6;O95758-2	19;18	1;1	1;1	Polypyrimidine tract-binding protein 3	PTBP3	sp|O95758-6|PTBP3_HUMAN Isoform 6 of Polypyrimidine tract-binding protein 3 OS=Homo sapiens OX=9606 GN=PTBP3;sp|O95758-2|PTBP3_HUMAN Isoform 2 of Polypyrimidine tract-binding protein 3 OS=Homo sapiens OX=9606 GN=PTBP3	2	19	1	1	9	11	10	9	12	14	10	12	10	11	13	12	11	10	13	11	10	9	9	9	11	14	0	0	0	0	1	1	0	1	1	1	1	0	0	0	0	0
O95777	O95777	6	6	6	U6 snRNA-associated Sm-like protein LSm8	LSM8	sp|O95777|LSM8_HUMAN U6 snRNA-associated Sm-like protein LSm8 OS=Homo sapiens OX=9606 GN=LSM8 PE=1 SV=3	1	6	6	6	3	4	2	3	2	2	3	2	1	1	5	5	3	4	4	5	3	3	2	1	2	2	3	4	2	3	2	2	3	2	1	1	5	5	3	4	4	5
O95782-2;O95782	O95782-2;O95782	29;29	29;29	22;22	AP-2 complex subunit alpha-1	AP2A1	sp|O95782-2|AP2A1_HUMAN Isoform B of AP-2 complex subunit alpha-1 OS=Homo sapiens OX=9606 GN=AP2A1;sp|O95782|AP2A1_HUMAN AP-2 complex subunit alpha-1 OS=Homo sapiens OX=9606 GN=AP2A1 PE=1 SV=3	2	29	29	22	23	21	16	17	14	14	14	11	11	13	22	22	16	15	22	23	18	19	12	11	16	16	23	21	16	17	14	14	14	11	11	13	22	22	16	15	22	23
O95785-2;O95785-4;O95785-3;O95785	O95785-2;O95785-4;O95785-3;O95785	3;3;3;3	3;3;3;3	3;3;3;3	Protein Wiz	WIZ	sp|O95785-2|WIZ_HUMAN Isoform 2 of Protein Wiz OS=Homo sapiens OX=9606 GN=WIZ;sp|O95785-4|WIZ_HUMAN Isoform 4 of Protein Wiz OS=Homo sapiens OX=9606 GN=WIZ;sp|O95785-3|WIZ_HUMAN Isoform 3 of Protein Wiz OS=Homo sapiens OX=9606 GN=WIZ;sp|O95785|WIZ_HUMAN Pr	4	3	3	3	0	0	1	0	0	0	0	1	0	0	1	2	2	1	0	1	1	0	0	0	0	0	0	0	1	0	0	0	0	1	0	0	1	2	2	1	0	1
O95793-2;O95793;O95793-3	O95793-2;O95793;O95793-3	21;21;20	21;21;20	20;20;19	Double-stranded RNA-binding protein Staufen homolog 1	STAU1	sp|O95793-2|STAU1_HUMAN Isoform Short of Double-stranded RNA-binding protein Staufen homolog 1 OS=Homo sapiens OX=9606 GN=STAU1;sp|O95793|STAU1_HUMAN Double-stranded RNA-binding protein Staufen homolog 1 OS=Homo sapiens OX=9606 GN=STAU1 PE=1 SV=2;sp|O95793	3	21	21	20	16	17	15	15	15	15	14	14	14	14	20	20	17	16	20	19	17	16	14	14	13	14	16	17	15	15	15	15	14	14	14	14	20	20	17	16	20	19
O95801	O95801	16	16	16	Tetratricopeptide repeat protein 4	TTC4	sp|O95801|TTC4_HUMAN Tetratricopeptide repeat protein 4 OS=Homo sapiens OX=9606 GN=TTC4 PE=1 SV=3	1	16	16	16	9	10	10	7	10	11	9	7	6	5	12	12	9	9	11	11	11	13	9	9	8	9	9	10	10	7	10	11	9	7	6	5	12	12	9	9	11	11
O95817	O95817	20	20	20	BAG family molecular chaperone regulator 3	BAG3	sp|O95817|BAG3_HUMAN BAG family molecular chaperone regulator 3 OS=Homo sapiens OX=9606 GN=BAG3 PE=1 SV=3	1	20	20	20	11	8	17	16	16	17	16	16	13	15	14	17	15	12	15	10	10	13	13	13	15	12	11	8	17	16	16	17	16	16	13	15	14	17	15	12	15	10
O95819-4;O95819-2;O95819-5;O95819-3	O95819-4;O95819-2;O95819-5;O95819-3	17;17;17;16	1;1;1;1	1;1;1;1	Mitogen-activated protein kinase kinase kinase kinase 4	MAP4K4	sp|O95819-4|M4K4_HUMAN Isoform 4 of Mitogen-activated protein kinase kinase kinase kinase 4 OS=Homo sapiens OX=9606 GN=MAP4K4;sp|O95819-2|M4K4_HUMAN Isoform 2 of Mitogen-activated protein kinase kinase kinase kinase 4 OS=Homo sapiens OX=9606 GN=MAP4K4;sp|O	4	17	1	1	3	3	8	5	8	9	7	6	6	7	11	9	7	6	2	2	1	4	8	9	9	9	0	0	1	0	1	1	1	1	1	1	1	1	1	1	0	0
O95819-6;O95819	O95819-6;O95819	17;16	17;16	1;1	Mitogen-activated protein kinase kinase kinase kinase 4	MAP4K4	sp|O95819-6|M4K4_HUMAN Isoform 6 of Mitogen-activated protein kinase kinase kinase kinase 4 OS=Homo sapiens OX=9606 GN=MAP4K4;sp|O95819|M4K4_HUMAN Mitogen-activated protein kinase kinase kinase kinase 4 OS=Homo sapiens OX=9606 GN=MAP4K4 PE=1 SV=2	2	17	17	1	4	3	8	6	8	9	7	6	5	7	11	9	7	6	3	2	1	5	8	9	9	9	4	3	8	6	8	9	7	6	5	7	11	9	7	6	3	2
O95822-2;O95822	O95822-2;O95822	1;1	1;1	1;1	Malonyl-CoA decarboxylase, mitochondrial	MLYCD	sp|O95822-2|DCMC_HUMAN Isoform Cytoplasmic+peroxisomal of Malonyl-CoA decarboxylase, mitochondrial OS=Homo sapiens OX=9606 GN=MLYCD;sp|O95822|DCMC_HUMAN Malonyl-CoA decarboxylase, mitochondrial OS=Homo sapiens OX=9606 GN=MLYCD PE=1 SV=3	2	1	1	1	0	0	0	1	1	1	1	1	0	1	0	0	1	1	1	0	0	0	1	1	1	1	0	0	0	1	1	1	1	1	0	1	0	0	1	1	1	0
O95825;O95825-2	O95825;O95825-2	6;4	6;4	6;4	Quinone oxidoreductase-like protein 1	CRYZL1	sp|O95825|QORL1_HUMAN Quinone oxidoreductase-like protein 1 OS=Homo sapiens OX=9606 GN=CRYZL1 PE=1 SV=2;sp|O95825-2|QORL1_HUMAN Isoform 2 of Quinone oxidoreductase-like protein 1 OS=Homo sapiens OX=9606 GN=CRYZL1	2	6	6	6	2	2	2	2	2	3	2	2	3	3	4	3	2	1	3	2	1	3	3	4	4	3	2	2	2	2	2	3	2	2	3	3	4	3	2	1	3	2
O95831-3;O95831;O95831-2;O95831-6;O95831-4;O95831-5	O95831-3;O95831;O95831-2	29;29;15;14;14;12	29;29;15;14;14;12	29;29;15;14;14;12	Apoptosis-inducing factor 1, mitochondrial	AIFM1	sp|O95831-3|AIFM1_HUMAN Isoform 3 of Apoptosis-inducing factor 1, mitochondrial OS=Homo sapiens OX=9606 GN=AIFM1;sp|O95831|AIFM1_HUMAN Apoptosis-inducing factor 1, mitochondrial OS=Homo sapiens OX=9606 GN=AIFM1 PE=1 SV=1;sp|O95831-2|AIFM1_HUMAN Isoform 2 o	6	29	29	29	19	18	16	14	12	12	11	13	13	11	19	19	15	14	20	21	17	17	14	13	21	17	19	18	16	14	12	12	11	13	13	11	19	19	15	14	20	21
O95834;O95834-2;O95834-3	O95834;O95834-2;O95834-3	8;8;8	8;8;8	8;8;8	Echinoderm microtubule-associated protein-like 2	EML2	sp|O95834|EMAL2_HUMAN Echinoderm microtubule-associated protein-like 2 OS=Homo sapiens OX=9606 GN=EML2 PE=1 SV=1;sp|O95834-2|EMAL2_HUMAN Isoform 2 of Echinoderm microtubule-associated protein-like 2 OS=Homo sapiens OX=9606 GN=EML2;sp|O95834-3|EMAL2_HUMAN I	3	8	8	8	2	1	5	5	5	4	6	7	5	4	4	4	3	3	2	2	2	3	5	5	2	2	2	1	5	5	5	4	6	7	5	4	4	4	3	3	2	2
O95841;Q9UKU9	O95841;Q9UKU9	1;1	1;1	1;1	Angiopoietin-related protein 1;Angiopoietin-related protein 2	ANGPTL1;ANGPTL2	sp|O95841|ANGL1_HUMAN Angiopoietin-related protein 1 OS=Homo sapiens OX=9606 GN=ANGPTL1 PE=2 SV=1;sp|Q9UKU9|ANGL2_HUMAN Angiopoietin-related protein 2 OS=Homo sapiens OX=9606 GN=ANGPTL2 PE=1 SV=1	2	1	1	1	0	0	1	1	0	1	1	1	1	1	0	0	1	0	0	0	0	0	0	0	0	0	0	0	1	1	0	1	1	1	1	1	0	0	1	0	0	0
O95861-4;O95861;O95861-3;O95861-2	O95861-4;O95861;O95861-3;O95861-2	13;13;10;10	13;13;10;10	13;13;10;10	3(2),5-bisphosphate nucleotidase 1	BPNT1	sp|O95861-4|BPNT1_HUMAN Isoform 4 of 3(2),5-bisphosphate nucleotidase 1 OS=Homo sapiens OX=9606 GN=BPNT1;sp|O95861|BPNT1_HUMAN 3(2),5-bisphosphate nucleotidase 1 OS=Homo sapiens OX=9606 GN=BPNT1 PE=1 SV=1;sp|O95861-3|BPNT1_HUMAN Isoform 3 of 3(2),5	4	13	13	13	10	9	9	7	5	7	6	6	6	5	8	8	6	4	8	7	9	6	5	5	5	6	10	9	9	7	5	7	6	6	6	5	8	8	6	4	8	7
O95864-3;O95864	O95864-3;O95864	1;1	1;1	1;1	Fatty acid desaturase 2	FADS2	sp|O95864-3|FADS2_HUMAN Isoform 3 of Acyl-CoA 6-desaturase OS=Homo sapiens OX=9606 GN=FADS2;sp|O95864|FADS2_HUMAN Acyl-CoA 6-desaturase OS=Homo sapiens OX=9606 GN=FADS2 PE=1 SV=1	2	1	1	1	0	0	0	0	1	1	1	1	0	1	0	0	1	0	0	0	0	0	1	1	0	0	0	0	0	0	1	1	1	1	0	1	0	0	1	0	0	0
O95865	O95865	6	6	6	N(G),N(G)-dimethylarginine dimethylaminohydrolase 2	DDAH2	sp|O95865|DDAH2_HUMAN N(G),N(G)-dimethylarginine dimethylaminohydrolase 2 OS=Homo sapiens OX=9606 GN=DDAH2 PE=1 SV=1	1	6	6	6	5	5	4	3	5	4	5	4	2	2	6	6	5	4	6	6	4	6	3	2	4	3	5	5	4	3	5	4	5	4	2	2	6	6	5	4	6	6
O95870-2;O95870	O95870-2;O95870	3;3	3;3	3;3	Abhydrolase domain-containing protein 16A	ABHD16A	sp|O95870-2|ABHGA_HUMAN Isoform 2 of Phosphatidylserine lipase ABHD16A OS=Homo sapiens OX=9606 GN=ABHD16A;sp|O95870|ABHGA_HUMAN Phosphatidylserine lipase ABHD16A OS=Homo sapiens OX=9606 GN=ABHD16A PE=1 SV=3	2	3	3	3	2	1	0	0	1	1	1	1	1	1	1	1	0	0	2	1	0	0	0	0	0	0	2	1	0	0	1	1	1	1	1	1	1	1	0	0	2	1
O95881	O95881	10	10	10	Thioredoxin domain-containing protein 12	TXNDC12	sp|O95881|TXD12_HUMAN Thioredoxin domain-containing protein 12 OS=Homo sapiens OX=9606 GN=TXNDC12 PE=1 SV=1	1	10	10	10	7	7	8	6	8	7	5	7	5	6	8	8	6	6	8	7	6	7	6	6	10	10	7	7	8	6	8	7	5	7	5	6	8	8	6	6	8	7
O95900	O95900	1	1	1	Probable tRNA pseudouridine synthase 2	TRUB2	sp|O95900|TRUB2_HUMAN Mitochondrial mRNA pseudouridine synthase TRUB2 OS=Homo sapiens OX=9606 GN=TRUB2 PE=1 SV=1	1	1	1	1	0	0	1	1	1	1	0	0	0	0	0	0	1	1	0	0	0	0	0	0	0	0	0	0	1	1	1	1	0	0	0	0	0	0	1	1	0	0
O95905-2;O95905;O95905-3	O95905-2;O95905;O95905-3	5;5;5	5;5;5	5;5;5	Protein SGT1	ECD	sp|O95905-2|ECD_HUMAN Isoform 2 of Protein ecdysoneless homolog OS=Homo sapiens OX=9606 GN=ECD;sp|O95905|ECD_HUMAN Protein ecdysoneless homolog OS=Homo sapiens OX=9606 GN=ECD PE=1 SV=1;sp|O95905-3|ECD_HUMAN Isoform 3 of Protein ecdysoneless homolog OS=Homo	3	5	5	5	1	0	2	2	2	2	3	1	2	2	3	2	3	3	1	1	1	1	2	2	0	0	1	0	2	2	2	2	3	1	2	2	3	2	3	3	1	1
O95926;O95926-2	O95926;O95926-2	6;4	6;4	6;4	Pre-mRNA-splicing factor SYF2	SYF2	sp|O95926|SYF2_HUMAN Pre-mRNA-splicing factor SYF2 OS=Homo sapiens OX=9606 GN=SYF2 PE=1 SV=1;sp|O95926-2|SYF2_HUMAN Isoform 2 of Pre-mRNA-splicing factor SYF2 OS=Homo sapiens OX=9606 GN=SYF2	2	6	6	6	0	1	2	3	5	4	3	4	3	5	3	3	3	4	2	1	2	3	5	5	5	5	0	1	2	3	5	4	3	4	3	5	3	3	3	4	2	1
O95983-2;O95983	O95983-2;O95983	11;11	11;11	10;10	Methyl-CpG-binding domain protein 3	MBD3	sp|O95983-2|MBD3_HUMAN Isoform 2 of Methyl-CpG-binding domain protein 3 OS=Homo sapiens OX=9606 GN=MBD3;sp|O95983|MBD3_HUMAN Methyl-CpG-binding domain protein 3 OS=Homo sapiens OX=9606 GN=MBD3 PE=1 SV=1	2	11	11	10	7	7	8	8	9	10	9	8	9	9	11	10	8	7	8	7	7	5	6	6	7	7	7	7	8	8	9	10	9	8	9	9	11	10	8	7	8	7
O95985;O95985-3;O95985-2	O95985;O95985-3;O95985-2	7;6;6	7;6;6	7;6;6	DNA topoisomerase 3-beta-1	TOP3B	sp|O95985|TOP3B_HUMAN DNA topoisomerase 3-beta-1 OS=Homo sapiens OX=9606 GN=TOP3B PE=1 SV=1;sp|O95985-3|TOP3B_HUMAN Isoform 3 of DNA topoisomerase 3-beta-1 OS=Homo sapiens OX=9606 GN=TOP3B;sp|O95985-2|TOP3B_HUMAN Isoform 2 of DNA topoisomerase 3-beta-1 OS=	3	7	7	7	1	0	3	3	6	6	6	6	6	6	3	2	2	3	1	1	0	2	4	6	0	1	1	0	3	3	6	6	6	6	6	6	3	2	2	3	1	1
O95989	O95989	4	4	4	Diphosphoinositol polyphosphate phosphohydrolase 1	NUDT3	sp|O95989|NUDT3_HUMAN Diphosphoinositol polyphosphate phosphohydrolase 1 OS=Homo sapiens OX=9606 GN=NUDT3 PE=1 SV=1	1	4	4	4	4	3	3	2	3	2	2	2	2	3	4	2	2	3	2	3	2	2	2	2	3	2	4	3	3	2	3	2	2	2	2	3	4	2	2	3	2	3
O95997	O95997	1	1	1	Securin	PTTG1	sp|O95997|PTTG1_HUMAN Securin OS=Homo sapiens OX=9606 GN=PTTG1 PE=1 SV=1	1	1	1	1	0	0	1	1	1	1	1	1	1	1	1	1	1	1	1	1	1	1	1	1	1	1	0	0	1	1	1	1	1	1	1	1	1	1	1	1	1	1
O95999	O95999	4	4	4	B-cell lymphoma/leukemia 10	BCL10	sp|O95999|BCL10_HUMAN B-cell lymphoma/leukemia 10 OS=Homo sapiens OX=9606 GN=BCL10 PE=1 SV=1	1	4	4	4	1	0	2	3	4	4	3	3	4	3	2	3	3	3	2	2	0	2	1	3	1	1	1	0	2	3	4	4	3	3	4	3	2	3	3	3	2	2
O96000;O96000-2	O96000;O96000-2	14;10	14;10	14;10	NADH dehydrogenase [ubiquinone] 1 beta subcomplex subunit 10	NDUFB10	sp|O96000|NDUBA_HUMAN NADH dehydrogenase [ubiquinone] 1 beta subcomplex subunit 10 OS=Homo sapiens OX=9606 GN=NDUFB10 PE=1 SV=3;sp|O96000-2|NDUBA_HUMAN Isoform 2 of NADH dehydrogenase [ubiquinone] 1 beta subcomplex subunit 10 OS=Homo sapiens OX=9606 GN=NDU	2	14	14	14	6	10	8	7	10	7	9	9	8	9	9	11	10	10	10	6	8	9	7	7	6	6	6	10	8	7	10	7	9	9	8	9	9	11	10	10	10	6
O96005-3;O96005-4;O96005	O96005-3;O96005-4;O96005	6;6;6	6;6;6	6;6;6	Cleft lip and palate transmembrane protein 1	CLPTM1	sp|O96005-3|CLPT1_HUMAN Isoform 2 of Cleft lip and palate transmembrane protein 1 OS=Homo sapiens OX=9606 GN=CLPTM1;sp|O96005-4|CLPT1_HUMAN Isoform 3 of Cleft lip and palate transmembrane protein 1 OS=Homo sapiens OX=9606 GN=CLPTM1;sp|O96005|CLPT1_HUMAN Cl	3	6	6	6	3	4	3	4	4	3	2	3	2	2	4	5	3	3	3	4	2	2	2	2	4	4	3	4	3	4	4	3	2	3	2	2	4	5	3	3	3	4
O96007	O96007	4	4	4	Molybdopterin synthase catalytic subunit	MOCS2	sp|O96007|MOC2B_HUMAN Molybdopterin synthase catalytic subunit OS=Homo sapiens OX=9606 GN=MOCS2 PE=1 SV=1	1	4	4	4	3	3	2	3	3	3	2	3	3	3	4	4	2	4	2	3	1	2	2	3	2	0	3	3	2	3	3	3	2	3	3	3	4	4	2	4	2	3
O96008;O96008-2	O96008;O96008-2	10;8	10;8	10;8	Mitochondrial import receptor subunit TOM40 homolog	TOMM40	sp|O96008|TOM40_HUMAN Mitochondrial import receptor subunit TOM40 homolog OS=Homo sapiens OX=9606 GN=TOMM40 PE=1 SV=1;sp|O96008-2|TOM40_HUMAN Isoform 2 of Mitochondrial import receptor subunit TOM40 homolog OS=Homo sapiens OX=9606 GN=TOMM40	2	10	10	10	3	3	2	2	4	5	3	2	2	2	7	6	3	3	5	3	1	4	4	3	4	5	3	3	2	2	4	5	3	2	2	2	7	6	3	3	5	3
O96013-3;O96013-4;O96013;O96013-2;Q9P286	O96013-3;O96013-4;O96013;O96013-2	8;8;8;7;1	8;8;8;7;1	8;8;8;7;1	Serine/threonine-protein kinase PAK 4	PAK4	sp|O96013-3|PAK4_HUMAN Isoform 3 of Serine/threonine-protein kinase PAK 4 OS=Homo sapiens OX=9606 GN=PAK4;sp|O96013-4|PAK4_HUMAN Isoform 4 of Serine/threonine-protein kinase PAK 4 OS=Homo sapiens OX=9606 GN=PAK4;sp|O96013|PAK4_HUMAN Serine/threonine-protei	5	8	8	8	2	3	5	5	5	5	5	5	5	4	5	4	5	5	5	2	1	2	4	5	5	4	2	3	5	5	5	5	5	5	5	4	5	4	5	5	5	2
O96017-12;O96017;O96017-9;O96017-11;O96017-13;O96017-4;O96017-3;O96017-6;O96017-5;O96017-8;O96017-7	O96017-12;O96017;O96017-9;O96017-11;O96017-13;O96017-4;O96017-3	4;4;4;3;3;3;2;1;1;1;1	4;4;4;3;3;3;2;1;1;1;1	3;3;3;3;3;3;2;0;0;0;0	Serine/threonine-protein kinase Chk2	CHEK2	sp|O96017-12|CHK2_HUMAN Isoform 12 of Serine/threonine-protein kinase Chk2 OS=Homo sapiens OX=9606 GN=CHEK2;sp|O96017|CHK2_HUMAN Serine/threonine-protein kinase Chk2 OS=Homo sapiens OX=9606 GN=CHEK2 PE=1 SV=1;sp|O96017-9|CHK2_HUMAN Isoform 9 of Serine/thre	11	4	4	3	0	0	1	2	2	2	2	3	2	2	1	2	2	3	0	0	0	0	1	2	0	0	0	0	1	2	2	2	2	3	2	2	1	2	2	3	0	0
O96019-2;O96019;O94805	O96019-2;O96019	17;17;2	17;17;2	17;17;2	Actin-like protein 6A	ACTL6A	sp|O96019-2|ACL6A_HUMAN Isoform 2 of Actin-like protein 6A OS=Homo sapiens OX=9606 GN=ACTL6A;sp|O96019|ACL6A_HUMAN Actin-like protein 6A OS=Homo sapiens OX=9606 GN=ACTL6A PE=1 SV=1	3	17	17	17	14	14	15	13	13	14	13	12	12	12	14	14	14	14	14	15	14	14	12	12	15	13	14	14	15	13	13	14	13	12	12	12	14	14	14	14	14	15
O96028;O96028-2;O96028-4;O96028-5;O96028-3	O96028;O96028-2;O96028-4	4;3;2;1;1	4;3;2;1;1	4;3;2;1;1	Histone-lysine N-methyltransferase NSD2	WHSC1	sp|O96028|NSD2_HUMAN Histone-lysine N-methyltransferase NSD2 OS=Homo sapiens OX=9606 GN=NSD2 PE=1 SV=1;sp|O96028-2|NSD2_HUMAN Isoform 2 of Histone-lysine N-methyltransferase NSD2 OS=Homo sapiens OX=9606 GN=NSD2;sp|O96028-4|NSD2_HUMAN Isoform 4 of Histone-l	5	4	4	4	1	0	2	4	3	1	3	4	3	3	4	4	1	2	0	0	1	1	2	3	1	0	1	0	2	4	3	1	3	4	3	3	4	4	1	2	0	0
O96033	O96033	3	3	3	Molybdopterin synthase sulfur carrier subunit	MOCS2	sp|O96033|MOC2A_HUMAN Molybdopterin synthase sulfur carrier subunit OS=Homo sapiens OX=9606 GN=MOCS2 PE=1 SV=1	1	3	3	3	2	2	0	1	1	1	1	0	1	1	1	2	2	1	2	1	2	1	1	2	1	1	2	2	0	1	1	1	1	0	1	1	1	2	2	1	2	1
P00167-2;P00167;P00167-3	P00167-2;P00167;P00167-3	7;7;6	7;7;6	7;7;6	Cytochrome b5	CYB5A	sp|P00167-2|CYB5_HUMAN Isoform 2 of Cytochrome b5 OS=Homo sapiens OX=9606 GN=CYB5A;sp|P00167|CYB5_HUMAN Cytochrome b5 OS=Homo sapiens OX=9606 GN=CYB5A PE=1 SV=2;sp|P00167-3|CYB5_HUMAN Isoform 3 of Cytochrome b5 OS=Homo sapiens OX=9606 GN=CYB5A	3	7	7	7	1	3	5	4	4	5	3	5	5	4	5	4	5	2	4	4	2	4	4	4	6	6	1	3	5	4	4	5	3	5	5	4	5	4	5	2	4	4
P00338;P00338-3;P00338-4;P00338-5;P00338-2;Q6ZMR3;P07864	P00338;P00338-3;P00338-4;P00338-5;P00338-2	35;33;26;22;22;2;1	35;33;26;22;22;2;1	33;31;25;20;20;1;0	L-lactate dehydrogenase A chain	LDHA	sp|P00338|LDHA_HUMAN L-lactate dehydrogenase A chain OS=Homo sapiens OX=9606 GN=LDHA PE=1 SV=2;sp|P00338-3|LDHA_HUMAN Isoform 3 of L-lactate dehydrogenase A chain OS=Homo sapiens OX=9606 GN=LDHA;sp|P00338-4|LDHA_HUMAN Isoform 4 of L-lactate dehydrogenase A	7	35	35	33	28	27	25	24	27	26	26	25	27	23	28	25	24	23	27	27	26	27	28	27	28	28	28	27	25	24	27	26	26	25	27	23	28	25	24	23	27	27
P00367;P00367-3;P00367-2	P00367;P00367-3;P00367-2	35;27;24	35;27;24	14;11;11	Glutamate dehydrogenase 1, mitochondrial	GLUD1	sp|P00367|DHE3_HUMAN Glutamate dehydrogenase 1, mitochondrial OS=Homo sapiens OX=9606 GN=GLUD1 PE=1 SV=2;sp|P00367-3|DHE3_HUMAN Isoform 3 of Glutamate dehydrogenase 1, mitochondrial OS=Homo sapiens OX=9606 GN=GLUD1;sp|P00367-2|DHE3_HUMAN Isoform 2 of Gluta	3	35	35	14	27	26	24	22	24	22	24	24	21	24	26	28	21	18	26	23	22	20	23	26	27	27	27	26	24	22	24	22	24	24	21	24	26	28	21	18	26	23
P00374;P00374-2;Q86XF0	P00374;P00374-2	8;6;1	8;6;1	8;6;1	Dihydrofolate reductase	DHFR	sp|P00374|DYR_HUMAN Dihydrofolate reductase OS=Homo sapiens OX=9606 GN=DHFR PE=1 SV=2;sp|P00374-2|DYR_HUMAN Isoform 2 of Dihydrofolate reductase OS=Homo sapiens OX=9606 GN=DHFR	3	8	8	8	4	4	3	3	3	1	1	2	1	2	4	4	4	4	5	4	5	5	2	2	5	5	4	4	3	3	3	1	1	2	1	2	4	4	4	4	5	4
P00387-2;P00387;P00387-3	P00387-2;P00387;P00387-3	22;22;22	22;22;22	22;22;22	NADH-cytochrome b5 reductase 3;NADH-cytochrome b5 reductase 3 membrane-bound form;NADH-cytochrome b5 reductase 3 soluble form	CYB5R3	sp|P00387-2|NB5R3_HUMAN Isoform 2 of NADH-cytochrome b5 reductase 3 OS=Homo sapiens OX=9606 GN=CYB5R3;sp|P00387|NB5R3_HUMAN NADH-cytochrome b5 reductase 3 OS=Homo sapiens OX=9606 GN=CYB5R3 PE=1 SV=3;sp|P00387-3|NB5R3_HUMAN Isoform 3 of NADH-cytochrome b5 r	3	22	22	22	14	14	18	17	18	16	15	17	17	17	18	19	17	18	19	15	14	12	16	16	13	13	14	14	18	17	18	16	15	17	17	17	18	19	17	18	19	15
P00390-2;P00390;P00390-3;P00390-4;P00390-5	P00390-2;P00390;P00390-3;P00390-4;P00390-5	17;17;16;15;14	17;17;16;15;14	17;17;16;15;14	Glutathione reductase, mitochondrial	GSR	sp|P00390-2|GSHR_HUMAN Isoform Cytoplasmic of Glutathione reductase, mitochondrial OS=Homo sapiens OX=9606 GN=GSR;sp|P00390|GSHR_HUMAN Glutathione reductase, mitochondrial OS=Homo sapiens OX=9606 GN=GSR PE=1 SV=2;sp|P00390-3|GSHR_HUMAN Isoform 2 of Glutath	5	17	17	17	13	11	11	12	11	9	8	8	8	8	15	15	9	7	15	12	15	13	7	6	8	5	13	11	11	12	11	9	8	8	8	8	15	15	9	7	15	12
P00395	P00395	2	2	2	Cytochrome c oxidase subunit 1	MT-CO1	sp|P00395|COX1_HUMAN Cytochrome c oxidase subunit 1 OS=Homo sapiens OX=9606 GN=MT-CO1 PE=1 SV=1	1	2	2	2	0	0	2	2	2	2	2	2	2	2	2	1	2	2	1	1	0	0	2	2	0	0	0	0	2	2	2	2	2	2	2	2	2	1	2	2	1	1
P00403	P00403	7	7	7	Cytochrome c oxidase subunit 2	MT-CO2	sp|P00403|COX2_HUMAN Cytochrome c oxidase subunit 2 OS=Homo sapiens OX=9606 GN=MT-CO2 PE=1 SV=1	1	7	7	7	4	4	4	3	4	4	4	3	3	3	5	5	3	3	6	5	3	4	4	4	4	4	4	4	4	3	4	4	4	3	3	3	5	5	3	3	6	5
P00414	P00414	1	1	1	Cytochrome c oxidase subunit 3	MT-CO3	sp|P00414|COX3_HUMAN Cytochrome c oxidase subunit 3 OS=Homo sapiens OX=9606 GN=MT-CO3 PE=1 SV=2	1	1	1	1	1	1	1	1	1	1	1	1	0	1	1	1	1	1	1	1	1	1	1	1	0	1	1	1	1	1	1	1	1	1	0	1	1	1	1	1	1	1
P00441	P00441	13	13	13	Superoxide dismutase [Cu-Zn]	SOD1	sp|P00441|SODC_HUMAN Superoxide dismutase [Cu-Zn] OS=Homo sapiens OX=9606 GN=SOD1 PE=1 SV=2	1	13	13	13	9	9	10	9	11	11	12	12	8	10	9	9	8	8	7	9	8	9	12	12	4	4	9	9	10	9	11	11	12	12	8	10	9	9	8	8	7	9
P00491	P00491	15	15	15	Purine nucleoside phosphorylase	PNP	sp|P00491|PNPH_HUMAN Purine nucleoside phosphorylase OS=Homo sapiens OX=9606 GN=PNP PE=1 SV=2	1	15	15	15	12	11	12	12	10	11	10	13	12	10	11	14	11	10	11	12	10	12	9	11	11	11	12	11	12	12	10	11	10	13	12	10	11	14	11	10	11	12
P00492	P00492	11	11	11	Hypoxanthine-guanine phosphoribosyltransferase	HPRT1	sp|P00492|HPRT_HUMAN Hypoxanthine-guanine phosphoribosyltransferase OS=Homo sapiens OX=9606 GN=HPRT1 PE=1 SV=2	1	11	11	11	5	6	6	6	6	7	6	6	7	6	8	7	5	5	8	8	8	10	7	6	8	7	5	6	6	6	6	7	6	6	7	6	8	7	5	5	8	8
P00505;P00505-2	P00505;P00505-2	18;16	18;16	18;16	Aspartate aminotransferase, mitochondrial	GOT2	sp|P00505|AATM_HUMAN Aspartate aminotransferase, mitochondrial OS=Homo sapiens OX=9606 GN=GOT2 PE=1 SV=3;sp|P00505-2|AATM_HUMAN Isoform 2 of Aspartate aminotransferase, mitochondrial OS=Homo sapiens OX=9606 GN=GOT2	2	18	18	18	13	12	10	12	10	11	12	11	12	12	14	15	12	11	15	16	12	14	8	11	11	10	13	12	10	12	10	11	12	11	12	12	14	15	12	11	15	16
P00558	P00558	57	57	5	Phosphoglycerate kinase 1	PGK1	sp|P00558|PGK1_HUMAN Phosphoglycerate kinase 1 OS=Homo sapiens OX=9606 GN=PGK1 PE=1 SV=3	1	57	57	5	42	42	39	36	36	35	37	36	37	37	39	35	38	34	40	37	36	37	40	36	44	43	42	42	39	36	36	35	37	36	37	37	39	35	38	34	40	37
P00558-2	P00558-2	52	1	1	Phosphoglycerate kinase 1	PGK1	sp|P00558-2|PGK1_HUMAN Isoform 2 of Phosphoglycerate kinase 1 OS=Homo sapiens OX=9606 GN=PGK1	1	52	1	1	37	37	35	33	33	32	34	33	35	34	36	31	35	30	36	33	32	34	37	33	40	38	0	0	0	1	1	1	1	1	1	1	1	0	1	0	0	0
P00568;Q9Y6K8-3;Q9Y6K8	P00568	13;1;1	13;1;1	12;0;0	Adenylate kinase isoenzyme 1	AK1	sp|P00568|KAD1_HUMAN Adenylate kinase isoenzyme 1 OS=Homo sapiens OX=9606 GN=AK1 PE=1 SV=3	3	13	13	12	7	7	9	8	9	9	9	9	10	9	7	7	9	10	10	9	9	8	10	8	9	9	7	7	9	8	9	9	9	9	10	9	7	7	9	10	10	9
P00750-2;P00750-4;P00750	P00750-2;P00750-4;P00750	1;1;1	1;1;1	1;1;1	Tissue-type plasminogen activator;Tissue-type plasminogen activator chain A;Tissue-type plasminogen activator chain B	PLAT	sp|P00750-2|TPA_HUMAN Isoform 2 of Tissue-type plasminogen activator OS=Homo sapiens OX=9606 GN=PLAT;sp|P00750-4|TPA_HUMAN Isoform 4 of Tissue-type plasminogen activator OS=Homo sapiens OX=9606 GN=PLAT;sp|P00750|TPA_HUMAN Tissue-type plasminogen activator	3	1	1	1	0	0	1	1	1	0	0	1	1	0	1	1	1	1	0	0	0	0	1	1	0	0	0	0	1	1	1	0	0	1	1	0	1	1	1	1	0	0
P00846	P00846	1	1	1	ATP synthase subunit a	MT-ATP6	sp|P00846|ATP6_HUMAN ATP synthase subunit a OS=Homo sapiens OX=9606 GN=MT-ATP6 PE=1 SV=1	1	1	1	1	1	1	0	0	0	0	0	0	0	0	1	1	0	0	1	1	1	1	0	0	1	1	1	1	0	0	0	0	0	0	0	0	1	1	0	0	1	1
P01023;P20742-2	P01023	19;1	17;0	17;0	Alpha-2-macroglobulin	A2M	sp|P01023|A2MG_HUMAN Alpha-2-macroglobulin OS=Homo sapiens OX=9606 GN=A2M PE=1 SV=3	2	19	17	17	10	8	10	10	8	7	8	8	7	8	14	14	8	7	15	12	5	10	8	7	5	6	8	7	9	9	7	6	7	7	6	7	13	12	7	6	13	10
P01034	P01034	1	1	1	Cystatin-C	CST3	sp|P01034|CYTC_HUMAN Cystatin-C OS=Homo sapiens OX=9606 GN=CST3 PE=1 SV=1	1	1	1	1	1	1	1	1	1	1	1	1	1	1	1	1	1	1	1	1	0	1	1	1	1	1	1	1	1	1	1	1	1	1	1	1	1	1	1	1	1	1
P01111	P01111	9	5	3	GTPase NRas	NRAS	sp|P01111|RASN_HUMAN GTPase NRas OS=Homo sapiens OX=9606 GN=NRAS PE=1 SV=1	1	9	5	3	7	7	5	5	7	5	6	5	4	5	6	7	2	3	6	5	4	2	6	6	6	6	4	3	4	3	4	4	4	4	2	4	3	4	1	2	2	2
P01112;P01112-2	P01112;P01112-2	8;6	2;2	2;2	GTPase HRas;GTPase HRas, N-terminally processed	HRAS	sp|P01112|RASH_HUMAN GTPase HRas OS=Homo sapiens OX=9606 GN=HRAS PE=1 SV=1;sp|P01112-2|RASH_HUMAN Isoform 2 of GTPase HRas OS=Homo sapiens OX=9606 GN=HRAS	2	8	2	2	5	6	3	2	6	3	4	4	3	3	3	4	1	3	5	4	4	3	6	5	5	4	0	0	0	0	1	0	0	1	0	0	0	0	0	1	0	0
P01116-2	P01116-2	10	10	1	GTPase KRas;GTPase KRas, N-terminally processed	KRAS	sp|P01116-2|RASK_HUMAN Isoform 2B of GTPase KRas OS=Homo sapiens OX=9606 GN=KRAS	1	10	10	1	6	6	4	4	7	4	6	4	5	5	5	3	3	4	7	6	5	4	6	6	6	7	6	6	4	4	7	4	6	4	5	5	5	3	3	4	7	6
P01130-3;P01130-6;P01130-4;P01130-5;P01130;P01130-2	P01130-3;P01130-6;P01130-4;P01130-5;P01130;P01130-2	4;4;4;4;4;3	4;4;4;4;4;3	4;4;4;4;4;3	Low-density lipoprotein receptor	LDLR	sp|P01130-3|LDLR_HUMAN Isoform 3 of Low-density lipoprotein receptor OS=Homo sapiens OX=9606 GN=LDLR;sp|P01130-6|LDLR_HUMAN Isoform 6 of Low-density lipoprotein receptor OS=Homo sapiens OX=9606 GN=LDLR;sp|P01130-4|LDLR_HUMAN Isoform 4 of Low-density lipopr	6	4	4	4	2	2	2	3	2	1	2	2	1	2	2	2	1	2	2	2	2	2	2	2	2	2	2	2	2	3	2	1	2	2	1	2	2	2	1	2	2	2
P01889	P01889	6	2	2	HLA class I histocompatibility antigen, B-7 alpha chain	HLA-B	sp|P01889|HLAB_HUMAN HLA class I histocompatibility antigen, B alpha chain OS=Homo sapiens OX=9606 GN=HLA-B PE=1 SV=3	1	6	2	2	3	5	4	4	3	3	3	3	3	3	3	3	1	2	4	4	2	3	1	1	4	3	0	1	1	2	2	2	1	2	2	2	0	0	0	0	0	0
P02462;P29400;P29400-2	P02462	6;2;2	6;2;2	6;2;2	Collagen alpha-1(IV) chain;Arresten	COL4A1	sp|P02462|CO4A1_HUMAN Collagen alpha-1(IV) chain OS=Homo sapiens OX=9606 GN=COL4A1 PE=1 SV=4	3	6	6	6	3	3	5	4	4	4	4	2	3	3	5	5	5	4	4	5	2	3	3	4	4	4	3	3	5	4	4	4	4	2	3	3	5	5	5	4	4	5
P02511	P02511	20	20	20	Alpha-crystallin B chain	CRYAB	sp|P02511|CRYAB_HUMAN Alpha-crystallin B chain OS=Homo sapiens OX=9606 GN=CRYAB PE=1 SV=2	1	20	20	20	4	3	4	5	3	4	1	3	4	3	4	4	7	3	1	1	15	16	18	17	18	17	4	3	4	5	3	4	1	3	4	3	4	4	7	3	1	1
P02545;P02545-6;P02545-3;P02545-5;P02545-4	P02545;P02545-6;P02545-3;P02545-5;P02545-4	87;84;84;69;69	87;84;84;69;69	5;2;4;5;5	Prelamin-A/C;Lamin-A/C	LMNA	sp|P02545|LMNA_HUMAN Prelamin-A/C OS=Homo sapiens OX=9606 GN=LMNA PE=1 SV=1;sp|P02545-6|LMNA_HUMAN Isoform 6 of Prelamin-A/C OS=Homo sapiens OX=9606 GN=LMNA;sp|P02545-3|LMNA_HUMAN Isoform ADelta10 of Prelamin-A/C OS=Homo sapiens OX=9606 GN=LMNA;sp|P02545-5	5	87	87	5	65	57	61	56	53	55	61	55	56	57	66	66	64	56	68	64	58	65	62	63	69	66	65	57	61	56	53	55	61	55	56	57	66	66	64	56	68	64
P02545-2	P02545-2	84	2	2	Prelamin-A/C;Lamin-A/C	LMNA	sp|P02545-2|LMNA_HUMAN Isoform C of Prelamin-A/C OS=Homo sapiens OX=9606 GN=LMNA	1	84	2	2	65	57	58	54	52	53	58	53	54	55	63	63	61	54	65	62	57	63	60	60	67	64	2	1	2	2	2	2	2	2	2	2	2	2	2	2	2	2
P02649;CON__Q03247	P02649	13;2	13;2	13;2	Apolipoprotein E	APOE	sp|P02649|APOE_HUMAN Apolipoprotein E OS=Homo sapiens OX=9606 GN=APOE PE=1 SV=1	2	13	13	13	5	3	8	10	8	7	8	7	7	6	7	7	6	5	4	5	9	7	5	6	9	9	5	3	8	10	8	7	8	7	7	6	7	7	6	5	4	5
P02656	P02656	1	1	1	Apolipoprotein C-III	APOC3	sp|P02656|APOC3_HUMAN Apolipoprotein C-III OS=Homo sapiens OX=9606 GN=APOC3 PE=1 SV=1	1	1	1	1	0	0	1	1	0	0	0	0	0	0	1	1	0	0	0	0	0	0	0	0	0	0	0	0	1	1	0	0	0	0	0	0	1	1	0	0	0	0
P02686;P02686-2;P02686-5;P02686-3;P02686-6;P02686-4	P02686;P02686-2;P02686-5;P02686-3	7;5;4;4;3;3	7;5;4;4;3;3	7;5;4;4;3;3	Myelin basic protein	MBP	sp|P02686|MBP_HUMAN Myelin basic protein OS=Homo sapiens OX=9606 GN=MBP PE=1 SV=3;sp|P02686-2|MBP_HUMAN Isoform 2 of Myelin basic protein OS=Homo sapiens OX=9606 GN=MBP;sp|P02686-5|MBP_HUMAN Isoform 5 of Myelin basic protein OS=Homo sapiens OX=9606 GN=MBP;	6	7	7	7	4	3	5	4	4	4	3	3	4	4	4	4	3	3	5	3	2	4	3	3	6	6	4	3	5	4	4	4	3	3	4	4	4	4	3	3	5	3
P02751;P02751-7;P02751-1;P02751-6;P02751-3;P02751-17;P02751-11;P02751-5;P02751-8;P02751-14;P02751-13;P02751-9;P02751-10;P02751-12;P02751-4;P02751-16;P02751-2	P02751;P02751-7;P02751-1;P02751-6;P02751-3;P02751-17;P02751-11;P02751-5;P02751-8;P02751-14;P02751-13;P02751-9;P02751-10;P02751-12;P02751-4	37;37;37;37;37;37;36;36;35;35;35;35;35;34;29;14;12	37;37;37;37;37;37;36;36;35;35;35;35;35;34;29;14;12	37;37;37;37;37;37;36;36;35;35;35;35;35;34;29;14;12	Fibronectin;Anastellin;Ugl-Y1;Ugl-Y2;Ugl-Y3	FN1	sp|P02751|FINC_HUMAN Fibronectin OS=Homo sapiens OX=9606 GN=FN1 PE=1 SV=5;sp|P02751-7|FINC_HUMAN Isoform 7 of Fibronectin OS=Homo sapiens OX=9606 GN=FN1;sp|P02751-1|FINC_HUMAN Isoform 1 of Fibronectin OS=Homo sapiens OX=9606 GN=FN1;sp|P02751-6|FINC_HUMAN I	17	37	37	37	9	10	9	17	11	11	8	10	10	9	31	30	20	17	29	24	6	8	9	11	3	3	9	10	9	17	11	11	8	10	10	9	31	30	20	17	29	24
P02786	P02786	51	51	51	Transferrin receptor protein 1;Transferrin receptor protein 1, serum form	TFRC	sp|P02786|TFR1_HUMAN Transferrin receptor protein 1 OS=Homo sapiens OX=9606 GN=TFRC PE=1 SV=2	1	51	51	51	39	36	37	37	37	39	37	36	36	37	40	40	37	35	40	37	32	35	38	33	39	38	39	36	37	37	37	39	37	36	36	37	40	40	37	35	40	37
P02794	P02794	6	6	6	Ferritin heavy chain;Ferritin heavy chain, N-terminally processed	FTH1	sp|P02794|FRIH_HUMAN Ferritin heavy chain OS=Homo sapiens OX=9606 GN=FTH1 PE=1 SV=2	1	6	6	6	3	1	5	6	4	5	6	5	3	5	3	6	5	6	5	3	1	2	4	5	5	5	3	1	5	6	4	5	6	5	3	5	3	6	5	6	5	3
P02795;P13640-2;P13640;CON__P67983;Q8N339;P04732;P80294;P04731	P02795;P13640-2;P13640	6;3;3;2;2;2;1;1	6;3;3;2;2;2;1;1	3;0;0;0;0;0;0;0	Metallothionein-2;Metallothionein-1G	MT2A;MT1G	sp|P02795|MT2_HUMAN Metallothionein-2 OS=Homo sapiens OX=9606 GN=MT2A PE=1 SV=1;sp|P13640-2|MT1G_HUMAN Isoform 2 of Metallothionein-1G OS=Homo sapiens OX=9606 GN=MT1G;sp|P13640|MT1G_HUMAN Metallothionein-1G OS=Homo sapiens OX=9606 GN=MT1G PE=1 SV=2	8	6	6	3	3	3	3	4	5	5	5	4	5	5	2	2	3	3	3	3	3	3	5	5	3	3	3	3	3	4	5	5	5	4	5	5	2	2	3	3	3	3
P03886	P03886	2	2	2	NADH-ubiquinone oxidoreductase chain 1	MT-ND1	sp|P03886|NU1M_HUMAN NADH-ubiquinone oxidoreductase chain 1 OS=Homo sapiens OX=9606 GN=MT-ND1 PE=1 SV=1	1	2	2	2	1	1	1	1	1	1	1	1	1	1	1	1	1	1	1	1	2	2	1	1	1	1	1	1	1	1	1	1	1	1	1	1	1	1	1	1	1	1
P03928	P03928	3	3	3	ATP synthase protein 8	MT-ATP8	sp|P03928|ATP8_HUMAN ATP synthase protein 8 OS=Homo sapiens OX=9606 GN=MT-ATP8 PE=1 SV=1	1	3	3	3	3	3	3	3	2	3	3	2	2	2	3	3	2	2	3	2	2	2	1	2	3	3	3	3	3	3	2	3	3	2	2	2	3	3	2	2	3	2
P04040	P04040	32	32	32	Catalase	CAT	sp|P04040|CATA_HUMAN Catalase OS=Homo sapiens OX=9606 GN=CAT PE=1 SV=3	1	32	32	32	23	22	26	22	19	21	24	23	23	25	25	24	21	23	24	22	19	16	17	18	21	21	23	22	26	22	19	21	24	23	23	25	25	24	21	23	24	22
P04062-4;P04062-2;P04062;P04062-5;P04062-3	P04062-4;P04062-2;P04062;P04062-5	16;16;16;13;6	16;16;16;13;6	16;16;16;13;6	Glucosylceramidase	GBA	sp|P04062-4|GLCM_HUMAN Isoform 4 of Lysosomal acid glucosylceramidase OS=Homo sapiens OX=9606 GN=GBA;sp|P04062-2|GLCM_HUMAN Isoform Short of Lysosomal acid glucosylceramidase OS=Homo sapiens OX=9606 GN=GBA;sp|P04062|GLCM_HUMAN Lysosomal acid glucosylcerami	5	16	16	16	8	10	12	8	10	11	9	9	8	13	10	12	10	9	8	8	8	6	7	5	11	8	8	10	12	8	10	11	9	9	8	13	10	12	10	9	8	8
P04066	P04066	4	4	4	Tissue alpha-L-fucosidase	FUCA1	sp|P04066|FUCO_HUMAN Tissue alpha-L-fucosidase OS=Homo sapiens OX=9606 GN=FUCA1 PE=1 SV=4	1	4	4	4	3	2	3	3	1	2	3	2	1	2	3	4	3	3	3	2	0	1	2	1	1	1	3	2	3	3	1	2	3	2	1	2	3	4	3	3	3	2
P04075;P04075-2	P04075;P04075-2	38;35	38;35	35;32	Fructose-bisphosphate aldolase A	ALDOA	sp|P04075|ALDOA_HUMAN Fructose-bisphosphate aldolase A OS=Homo sapiens OX=9606 GN=ALDOA PE=1 SV=2;sp|P04075-2|ALDOA_HUMAN Isoform 2 of Fructose-bisphosphate aldolase A OS=Homo sapiens OX=9606 GN=ALDOA	2	38	38	35	33	34	33	33	34	34	33	32	30	31	34	33	32	31	34	32	31	33	33	32	33	34	33	34	33	33	34	34	33	32	30	31	34	33	32	31	34	32
P04080	P04080	5	5	5	Cystatin-B	CSTB	sp|P04080|CYTB_HUMAN Cystatin-B OS=Homo sapiens OX=9606 GN=CSTB PE=1 SV=2	1	5	5	5	4	4	4	4	3	4	3	3	3	3	4	4	3	3	4	5	3	3	3	3	3	3	4	4	4	4	3	4	3	3	3	3	4	4	3	3	4	5
P04083	P04083	26	26	26	Annexin A1	ANXA1	sp|P04083|ANXA1_HUMAN Annexin A1 OS=Homo sapiens OX=9606 GN=ANXA1 PE=1 SV=2	1	26	26	26	15	15	17	14	13	16	12	13	12	11	18	18	19	17	19	20	18	18	16	15	22	21	15	15	17	14	13	16	12	13	12	11	18	18	19	17	19	20
P04150-9;P04150-2;P04150-6;P04150-8;P04150;P04150-3;P04150-13;P04150-12;P04150-11;P04150-10;P04150-16;P04150-15;P04150-14;P04150-7;P04150-5	P04150-9;P04150-2;P04150-6;P04150-8;P04150;P04150-3;P04150-13;P04150-12;P04150-11;P04150-10;P04150-16;P04150-15;P04150-14;P04150-7;P04150-5	4;4;4;4;4;4;3;3;3;3;2;2;2;2;2	4;4;4;4;4;4;3;3;3;3;2;2;2;2;2	4;4;4;4;4;4;3;3;3;3;2;2;2;2;2	Glucocorticoid receptor	NR3C1	sp|P04150-9|GCR_HUMAN Isoform Beta-B of Glucocorticoid receptor OS=Homo sapiens OX=9606 GN=NR3C1;sp|P04150-2|GCR_HUMAN Isoform Beta of Glucocorticoid receptor OS=Homo sapiens OX=9606 GN=NR3C1;sp|P04150-6|GCR_HUMAN Isoform Beta-2 of Glucocorticoid receptor	15	4	4	4	0	1	2	2	3	3	3	3	3	3	2	3	2	3	2	2	0	1	3	3	1	1	0	1	2	2	3	3	3	3	3	3	2	3	2	3	2	2
P04156	P04156	2	2	2	Major prion protein	PRNP	sp|P04156|PRIO_HUMAN Major prion protein OS=Homo sapiens OX=9606 GN=PRNP PE=1 SV=1	1	2	2	2	1	0	1	0	0	0	0	0	0	0	1	2	1	1	1	1	1	1	0	0	1	1	1	0	1	0	0	0	0	0	0	0	1	2	1	1	1	1
P04179-3;P04179-4;P04179-2;P04179	P04179-3;P04179-4;P04179-2;P04179	2;2;2;2	2;2;2;2	2;2;2;2	Superoxide dismutase [Mn], mitochondrial	SOD2	sp|P04179-3|SODM_HUMAN Isoform 3 of Superoxide dismutase [Mn], mitochondrial OS=Homo sapiens OX=9606 GN=SOD2;sp|P04179-4|SODM_HUMAN Isoform 4 of Superoxide dismutase [Mn], mitochondrial OS=Homo sapiens OX=9606 GN=SOD2;sp|P04179-2|SODM_HUMAN Isoform 2 of Su	4	2	2	2	1	1	1	1	2	2	1	1	1	1	1	1	2	2	1	1	1	1	1	1	1	2	1	1	1	1	2	2	1	1	1	1	1	1	2	2	1	1
P04181	P04181	28	28	14	Ornithine aminotransferase, mitochondrial;Ornithine aminotransferase, hepatic form;Ornithine aminotransferase, renal form	OAT	sp|P04181|OAT_HUMAN Ornithine aminotransferase, mitochondrial OS=Homo sapiens OX=9606 GN=OAT PE=1 SV=1	1	28	28	14	24	23	23	20	22	21	22	21	20	19	25	24	23	21	22	22	21	18	21	20	19	21	24	23	23	20	22	21	22	21	20	19	25	24	23	21	22	22
P04183	P04183	6	6	6	Thymidine kinase, cytosolic	TK1	sp|P04183|KITH_HUMAN Thymidine kinase, cytosolic OS=Homo sapiens OX=9606 GN=TK1 PE=1 SV=2	1	6	6	6	0	0	4	4	3	3	3	2	3	2	3	3	4	4	0	0	2	3	3	3	3	3	0	0	4	4	3	3	3	2	3	2	3	3	4	4	0	0
P04271	P04271	4	4	4	Protein S100-B	S100B	sp|P04271|S100B_HUMAN Protein S100-B OS=Homo sapiens OX=9606 GN=S100B PE=1 SV=2	1	4	4	4	1	1	3	2	1	1	2	2	3	2	3	3	3	3	2	2	1	2	3	3	3	1	1	1	3	2	1	1	2	2	3	2	3	3	3	3	2	2
P04350	P04350	37	8	5	Tubulin beta-4A chain	TUBB4A	sp|P04350|TBB4A_HUMAN Tubulin beta-4A chain OS=Homo sapiens OX=9606 GN=TUBB4A PE=1 SV=2	1	37	8	5	30	29	33	30	34	33	31	33	32	29	33	32	35	32	32	30	29	30	27	30	36	34	6	6	6	5	6	6	6	6	5	6	6	7	7	6	7	5
P04406;P04406-2	P04406;P04406-2	38;36	38;36	37;35	Glyceraldehyde-3-phosphate dehydrogenase	GAPDH	sp|P04406|G3P_HUMAN Glyceraldehyde-3-phosphate dehydrogenase OS=Homo sapiens OX=9606 GN=GAPDH PE=1 SV=3;sp|P04406-2|G3P_HUMAN Isoform 2 of Glyceraldehyde-3-phosphate dehydrogenase OS=Homo sapiens OX=9606 GN=GAPDH	2	38	38	37	34	34	34	30	32	31	30	31	30	30	31	32	30	30	31	31	29	29	31	31	34	33	34	34	34	30	32	31	30	31	30	30	31	32	30	30	31	31
P04424-3;P04424-2;P04424	P04424-3;P04424-2;P04424	3;3;3	3;3;3	3;3;3	Argininosuccinate lyase	ASL	sp|P04424-3|ARLY_HUMAN Isoform 3 of Argininosuccinate lyase OS=Homo sapiens OX=9606 GN=ASL;sp|P04424-2|ARLY_HUMAN Isoform 2 of Argininosuccinate lyase OS=Homo sapiens OX=9606 GN=ASL;sp|P04424|ARLY_HUMAN Argininosuccinate lyase OS=Homo sapiens OX=9606 GN=AS	3	3	3	3	0	0	2	2	1	1	2	2	2	1	2	2	2	2	1	2	1	0	0	1	0	0	0	0	2	2	1	1	2	2	2	1	2	2	2	2	1	2
P04439;P04439-2;P30511-2;P30511;P30511-3;P17693-6;P17693-2;P17693-5;P17693	P04439;P04439-2	17;17;2;2;2;1;1;1;1	17;17;2;2;2;1;1;1;1	9;9;0;0;0;0;0;0;0	HLA class I histocompatibility antigen, A-3 alpha chain	HLA-A	sp|P04439|HLAA_HUMAN HLA class I histocompatibility antigen, A alpha chain OS=Homo sapiens OX=9606 GN=HLA-A PE=1 SV=2;sp|P04439-2|HLAA_HUMAN Isoform 2 of HLA class I histocompatibility antigen, A alpha chain OS=Homo sapiens OX=9606 GN=HLA-A	9	17	17	9	13	12	14	13	14	14	14	14	14	14	15	15	14	13	15	15	13	14	14	14	12	11	13	12	14	13	14	14	14	14	14	14	15	15	14	13	15	15
P04632	P04632	16	16	14	Calpain small subunit 1	CAPNS1	sp|P04632|CPNS1_HUMAN Calpain small subunit 1 OS=Homo sapiens OX=9606 GN=CAPNS1 PE=1 SV=1	1	16	16	14	7	8	11	11	9	12	10	10	10	9	11	11	10	10	10	9	5	6	6	9	8	8	7	8	11	11	9	12	10	10	10	9	11	11	10	10	10	9
P04637-7;P04637-4;P04637	P04637-7;P04637-4;P04637	1;1;1	1;1;1	1;1;1	Cellular tumor antigen p53	TP53	sp|P04637-7|P53_HUMAN Isoform 7 of Cellular tumor antigen p53 OS=Homo sapiens OX=9606 GN=TP53;sp|P04637-4|P53_HUMAN Isoform 4 of Cellular tumor antigen p53 OS=Homo sapiens OX=9606 GN=TP53;sp|P04637|P53_HUMAN Cellular tumor antigen p53 OS=Homo sapiens OX=96	3	1	1	1	0	0	0	1	1	1	1	1	1	1	0	1	0	0	0	0	0	0	1	1	0	0	0	0	0	1	1	1	1	1	1	1	0	1	0	0	0	0
P04792	P04792	20	20	20	Heat shock protein beta-1	HSPB1	sp|P04792|HSPB1_HUMAN Heat shock protein beta-1 OS=Homo sapiens OX=9606 GN=HSPB1 PE=1 SV=2	1	20	20	20	15	14	13	15	13	14	13	14	14	13	15	16	16	13	17	16	16	19	13	13	16	16	15	14	13	15	13	14	13	14	14	13	15	16	16	13	17	16
P04818;P04818-2;P04818-3	P04818;P04818-2;P04818-3	16;12;8	16;12;8	16;12;8	Thymidylate synthase	TYMS	sp|P04818|TYSY_HUMAN Thymidylate synthase OS=Homo sapiens OX=9606 GN=TYMS PE=1 SV=3;sp|P04818-2|TYSY_HUMAN Isoform 2 of Thymidylate synthase OS=Homo sapiens OX=9606 GN=TYMS;sp|P04818-3|TYSY_HUMAN Isoform 3 of Thymidylate synthase OS=Homo sapiens OX=9606 GN	3	16	16	16	10	7	10	8	10	10	9	9	8	10	11	11	10	9	10	10	11	12	12	12	15	14	10	7	10	8	10	10	9	9	8	10	11	11	10	9	10	10
P04843	P04843	47	47	47	Dolichyl-diphosphooligosaccharide--protein glycosyltransferase subunit 1	RPN1	sp|P04843|RPN1_HUMAN Dolichyl-diphosphooligosaccharide--protein glycosyltransferase subunit 1 OS=Homo sapiens OX=9606 GN=RPN1 PE=1 SV=1	1	47	47	47	36	33	35	33	36	34	35	34	36	37	38	39	32	30	38	33	29	33	30	31	36	34	36	33	35	33	36	34	35	34	36	37	38	39	32	30	38	33
P04844;P04844-2	P04844;P04844-2	21;20	21;20	21;20	Dolichyl-diphosphooligosaccharide--protein glycosyltransferase subunit 2	RPN2	sp|P04844|RPN2_HUMAN Dolichyl-diphosphooligosaccharide--protein glycosyltransferase subunit 2 OS=Homo sapiens OX=9606 GN=RPN2 PE=1 SV=3;sp|P04844-2|RPN2_HUMAN Isoform 2 of Dolichyl-diphosphooligosaccharide--protein glycosyltransferase subunit 2 OS=Homo sap	2	21	21	21	10	13	14	15	12	13	13	14	14	13	16	17	14	15	20	16	13	13	13	13	16	16	10	13	14	15	12	13	13	14	14	13	16	17	14	15	20	16
P04899;P04899-4;P04899-6;P04899-3;P04899-5;P04899-2;P11488;P19087;A8MTJ3	P04899;P04899-4;P04899-6;P04899-3;P04899-5;P04899-2	22;22;20;20;20;20;2;2;2	22;22;20;20;20;20;2;2;2	13;13;12;12;12;12;0;0;0	Guanine nucleotide-binding protein G(i) subunit alpha-2	GNAI2	sp|P04899|GNAI2_HUMAN Guanine nucleotide-binding protein G(i) subunit alpha-2 OS=Homo sapiens OX=9606 GN=GNAI2 PE=1 SV=3;sp|P04899-4|GNAI2_HUMAN Isoform sGi2 of Guanine nucleotide-binding protein G(i) subunit alpha-2 OS=Homo sapiens OX=9606 GN=GNAI2;sp|P04	9	22	22	13	14	14	17	13	14	14	13	13	11	12	19	19	16	13	19	15	13	16	12	13	17	20	14	14	17	13	14	14	13	13	11	12	19	19	16	13	19	15
Q93077;Q7L7L0;P04908	Q93077;Q7L7L0;P04908	7;7;7	2;2;2	2;2;2	Histone H2A type 1-C;Histone H2A type 3;Histone H2A type 1-B/E	HIST1H2AC;HIST3H2A;HIST1H2AB	sp|Q93077|H2A1C_HUMAN Histone H2A type 1-C OS=Homo sapiens OX=9606 GN=H2AC6 PE=1 SV=3;sp|Q7L7L0|H2A3_HUMAN Histone H2A type 3 OS=Homo sapiens OX=9606 GN=H2AW PE=1 SV=3;sp|P04908|H2A1B_HUMAN Histone H2A type 1-B/E OS=Homo sapiens OX=9606 GN=H2AC4 PE=1 SV=2	3	7	2	2	7	7	7	7	7	7	7	7	7	7	7	7	7	7	7	7	7	7	7	7	7	7	2	2	2	2	2	2	2	2	2	2	2	2	2	2	2	2
P04920-2;P04920-3;P04920	P04920-2;P04920-3;P04920	11;11;11	11;11;11	10;10;10	Anion exchange protein 2	SLC4A2	sp|P04920-2|B3A2_HUMAN Isoform B1 of Anion exchange protein 2 OS=Homo sapiens OX=9606 GN=SLC4A2;sp|P04920-3|B3A2_HUMAN Isoform 3 of Anion exchange protein 2 OS=Homo sapiens OX=9606 GN=SLC4A2;sp|P04920|B3A2_HUMAN Anion exchange protein 2 OS=Homo sapiens OX=	3	11	11	10	2	1	5	3	6	6	5	6	5	6	6	5	4	3	4	4	5	5	7	6	9	9	2	1	5	3	6	6	5	6	5	6	6	5	4	3	4	4
P04921-2;P04921-3;P04921	P04921-2;P04921-3;P04921	1;1;1	1;1;1	1;1;1	Glycophorin-C	GYPC	sp|P04921-2|GLPC_HUMAN Isoform Glycophorin-D of Glycophorin-C OS=Homo sapiens OX=9606 GN=GYPC;sp|P04921-3|GLPC_HUMAN Isoform 3 of Glycophorin-C OS=Homo sapiens OX=9606 GN=GYPC;sp|P04921|GLPC_HUMAN Glycophorin-C OS=Homo sapiens OX=9606 GN=GYPC PE=1 SV=1	3	1	1	1	0	0	1	0	1	0	0	1	0	0	0	1	1	1	1	1	0	0	0	0	0	0	0	0	1	0	1	0	0	1	0	0	0	1	1	1	1	1
P05023-4;P05023;P05023-3;P05023-2;P13637;P13637-2;P13637-3;P50993;P54707;P54707-2;P20648	P05023-4;P05023;P05023-3;P05023-2	60;60;56;42;16;16;16;15;4;4;3	60;60;56;42;16;16;16;15;4;4;3	51;51;47;35;8;8;8;7;0;0;1	Sodium/potassium-transporting ATPase subunit alpha-1	ATP1A1	sp|P05023-4|AT1A1_HUMAN Isoform 4 of Sodium/potassium-transporting ATPase subunit alpha-1 OS=Homo sapiens OX=9606 GN=ATP1A1;sp|P05023|AT1A1_HUMAN Sodium/potassium-transporting ATPase subunit alpha-1 OS=Homo sapiens OX=9606 GN=ATP1A1 PE=1 SV=1;sp|P05023-3|A	11	60	60	51	43	45	38	33	36	38	34	36	30	32	40	42	35	31	49	41	40	39	30	32	40	38	43	45	38	33	36	38	34	36	30	32	40	42	35	31	49	41
P05067-11;P05067-8;P05067;P05067-10;P05067-4;P05067-6;P05067-7;P05067-9;P05067-3;P05067-5;P05067-2	P05067-11;P05067-8;P05067;P05067-10;P05067-4;P05067-6;P05067-7;P05067-9;P05067-3;P05067-5	11;11;11;10;10;10;10;10;9;9;4	11;11;11;10;10;10;10;10;9;9;4	11;11;11;10;10;10;10;10;9;9;4	Amyloid beta A4 protein;N-APP;Soluble APP-alpha;Soluble APP-beta;C99;Beta-amyloid protein 42;Beta-amyloid protein 40;C83;P3(42);P3(40);C80;Gamma-secretase C-terminal fragment 59;Gamma-secretase C-terminal fragment 57;Gamma-secretase C-terminal fragment 50;C31	APP	sp|P05067-11|A4_HUMAN Isoform 11 of Amyloid-beta precursor protein OS=Homo sapiens OX=9606 GN=APP;sp|P05067-8|A4_HUMAN Isoform APP751 of Amyloid-beta precursor protein OS=Homo sapiens OX=9606 GN=APP;sp|P05067|A4_HUMAN Amyloid-beta precursor protein OS=Homo	11	11	11	11	5	5	7	8	8	8	5	7	8	7	8	5	7	6	6	5	6	7	7	8	4	4	5	5	7	8	8	8	5	7	8	7	8	5	7	6	6	5
P05090	P05090	8	8	8	Apolipoprotein D	APOD	sp|P05090|APOD_HUMAN Apolipoprotein D OS=Homo sapiens OX=9606 GN=APOD PE=1 SV=1	1	8	8	8	4	4	5	4	0	0	1	0	2	1	7	7	7	6	7	8	1	1	1	2	2	1	4	4	5	4	0	0	1	0	2	1	7	7	7	6	7	8
P05114	P05114	3	3	3	Non-histone chromosomal protein HMG-14	HMGN1	sp|P05114|HMGN1_HUMAN Non-histone chromosomal protein HMG-14 OS=Homo sapiens OX=9606 GN=HMGN1 PE=1 SV=3	1	3	3	3	1	1	1	2	1	1	1	1	2	1	2	0	1	0	1	1	2	2	3	2	1	2	1	1	1	2	1	1	1	1	2	1	2	0	1	0	1	1
P05141;Q9H0C2	P05141	27;5	11;0	11;0	ADP/ATP translocase 2;ADP/ATP translocase 2, N-terminally processed	SLC25A5	sp|P05141|ADT2_HUMAN ADP/ATP translocase 2 OS=Homo sapiens OX=9606 GN=SLC25A5 PE=1 SV=7	2	27	11	11	20	21	18	15	14	17	17	14	14	15	18	18	16	15	18	19	22	17	15	15	20	19	9	10	7	7	6	8	9	5	6	7	10	10	7	6	9	9
P05165-3;P05165-2;P05165	P05165-3;P05165-2;P05165	8;8;8	8;8;8	8;8;8	Propionyl-CoA carboxylase alpha chain, mitochondrial	PCCA	sp|P05165-3|PCCA_HUMAN Isoform 3 of Propionyl-CoA carboxylase alpha chain, mitochondrial OS=Homo sapiens OX=9606 GN=PCCA;sp|P05165-2|PCCA_HUMAN Isoform 2 of Propionyl-CoA carboxylase alpha chain, mitochondrial OS=Homo sapiens OX=9606 GN=PCCA;sp|P05165|PCCA	3	8	8	8	4	3	7	7	6	6	6	6	5	5	6	7	6	3	4	3	2	3	5	5	2	3	4	3	7	7	6	6	6	6	5	5	6	7	6	3	4	3
P05166;P05166-2	P05166;P05166-2	4;4	4;4	4;4	Propionyl-CoA carboxylase beta chain, mitochondrial	PCCB	sp|P05166|PCCB_HUMAN Propionyl-CoA carboxylase beta chain, mitochondrial OS=Homo sapiens OX=9606 GN=PCCB PE=1 SV=3;sp|P05166-2|PCCB_HUMAN Isoform 2 of Propionyl-CoA carboxylase beta chain, mitochondrial OS=Homo sapiens OX=9606 GN=PCCB	2	4	4	4	2	2	2	2	1	1	1	1	2	1	3	3	2	3	2	2	3	2	1	1	2	3	2	2	2	2	1	1	1	1	2	1	3	3	2	3	2	2
P05198	P05198	30	30	30	Eukaryotic translation initiation factor 2 subunit 1	EIF2S1	sp|P05198|IF2A_HUMAN Eukaryotic translation initiation factor 2 subunit 1 OS=Homo sapiens OX=9606 GN=EIF2S1 PE=1 SV=3	1	30	30	30	20	21	22	20	18	19	18	17	20	18	24	24	20	19	21	17	17	21	16	19	23	19	20	21	22	20	18	19	18	17	20	18	24	24	20	19	21	17
P05204;Q15651-2	P05204	7;1	7;1	6;0	Non-histone chromosomal protein HMG-17	HMGN2	sp|P05204|HMGN2_HUMAN Non-histone chromosomal protein HMG-17 OS=Homo sapiens OX=9606 GN=HMGN2 PE=1 SV=3	2	7	7	6	4	4	5	6	5	6	5	5	6	6	5	5	5	4	5	5	6	6	7	6	5	4	4	4	5	6	5	6	5	5	6	6	5	5	5	4	5	5
P05362	P05362	4	4	4	Intercellular adhesion molecule 1	ICAM1	sp|P05362|ICAM1_HUMAN Intercellular adhesion molecule 1 OS=Homo sapiens OX=9606 GN=ICAM1 PE=1 SV=2	1	4	4	4	1	1	2	1	0	2	1	1	2	2	2	2	1	1	1	3	0	1	1	1	0	0	1	1	2	1	0	2	1	1	2	2	2	2	1	1	1	3
P05386	P05386	4	4	4	60S acidic ribosomal protein P1	RPLP1	sp|P05386|RLA1_HUMAN 60S acidic ribosomal protein P1 OS=Homo sapiens OX=9606 GN=RPLP1 PE=1 SV=1	1	4	4	4	3	3	4	4	4	4	4	4	4	4	4	4	4	4	4	4	3	3	4	4	3	4	3	3	4	4	4	4	4	4	4	4	4	4	4	4	4	4
P05387	P05387	14	14	14	60S acidic ribosomal protein P2	RPLP2	sp|P05387|RLA2_HUMAN 60S acidic ribosomal protein P2 OS=Homo sapiens OX=9606 GN=RPLP2 PE=1 SV=1	1	14	14	14	12	12	9	9	10	10	10	11	9	10	9	9	9	9	10	10	9	10	10	11	13	12	12	12	9	9	10	10	10	11	9	10	9	9	9	9	10	10
P05388;P05388-2;Q8NHW5	P05388;P05388-2;Q8NHW5	23;21;12	23;21;12	23;21;12	60S acidic ribosomal protein P0;60S acidic ribosomal protein P0-like	RPLP0;RPLP0P6	sp|P05388|RLA0_HUMAN 60S acidic ribosomal protein P0 OS=Homo sapiens OX=9606 GN=RPLP0 PE=1 SV=1;sp|P05388-2|RLA0_HUMAN Isoform 2 of 60S acidic ribosomal protein P0 OS=Homo sapiens OX=9606 GN=RPLP0;sp|Q8NHW5|RLA0L_HUMAN 60S acidic ribosomal protein P0-like	3	23	23	23	17	18	17	17	15	16	17	16	15	16	18	17	17	17	17	18	17	17	17	16	19	20	17	18	17	17	15	16	17	16	15	16	18	17	17	17	17	18
P05455	P05455	39	39	39	Lupus La protein	SSB	sp|P05455|LA_HUMAN Lupus La protein OS=Homo sapiens OX=9606 GN=SSB PE=1 SV=2	1	39	39	39	24	24	26	30	30	29	29	28	28	28	29	30	26	27	28	27	25	26	29	29	28	27	24	24	26	30	30	29	29	28	28	28	29	30	26	27	28	27
P05549;P05549-6;P05549-2;Q6VUC0;Q92481;Q92481-2	P05549;P05549-6;P05549-2	15;14;10;5;5;5	15;14;10;5;5;5	1;0;1;0;0;0	Transcription factor AP-2-alpha	TFAP2A	sp|P05549|AP2A_HUMAN Transcription factor AP-2-alpha OS=Homo sapiens OX=9606 GN=TFAP2A PE=1 SV=1;sp|P05549-6|AP2A_HUMAN Isoform 5 of Transcription factor AP-2-alpha OS=Homo sapiens OX=9606 GN=TFAP2A;sp|P05549-2|AP2A_HUMAN Isoform 4 of Transcription factor	6	15	15	1	8	5	7	6	4	6	5	6	7	4	8	6	5	4	7	6	9	8	7	5	6	6	8	5	7	6	4	6	5	6	7	4	8	6	5	4	7	6
P05549-5	P05549-5	15	1	1	Transcription factor AP-2-alpha	TFAP2A	sp|P05549-5|AP2A_HUMAN Isoform 2 of Transcription factor AP-2-alpha OS=Homo sapiens OX=9606 GN=TFAP2A	1	15	1	1	9	5	7	6	4	6	5	6	6	4	7	6	5	4	6	6	9	7	7	5	5	5	1	0	1	1	1	1	1	1	0	1	0	0	1	1	0	0
P05556;P05556-2;P05556-5;P05556-4;P05556-3	P05556;P05556-2;P05556-5;P05556-4;P05556-3	21;18;18;18;18	21;18;18;18;18	21;18;18;18;18	Integrin beta-1	ITGB1	sp|P05556|ITB1_HUMAN Integrin beta-1 OS=Homo sapiens OX=9606 GN=ITGB1 PE=1 SV=2;sp|P05556-2|ITB1_HUMAN Isoform 2 of Integrin beta-1 OS=Homo sapiens OX=9606 GN=ITGB1;sp|P05556-5|ITB1_HUMAN Isoform 5 of Integrin beta-1 OS=Homo sapiens OX=9606 GN=ITGB1;sp|P05	5	21	21	21	11	13	11	10	12	12	11	12	10	9	14	12	14	13	11	13	11	10	11	10	11	13	11	13	11	10	12	12	11	12	10	9	14	12	14	13	11	13
P05976-2;P05976;P08590	P05976-2;P05976;P08590	2;2;2	2;2;2	2;2;2	Myosin light chain 1/3, skeletal muscle isoform;Myosin light chain 3	MYL1;MYL3	sp|P05976-2|MYL1_HUMAN Isoform MLC3 of Myosin light chain 1/3, skeletal muscle isoform OS=Homo sapiens OX=9606 GN=MYL1;sp|P05976|MYL1_HUMAN Myosin light chain 1/3, skeletal muscle isoform OS=Homo sapiens OX=9606 GN=MYL1 PE=1 SV=3;sp|P08590|MYL3_HUMAN Myosi	3	2	2	2	2	2	2	2	1	1	1	1	1	1	2	2	1	1	2	2	1	2	1	1	2	1	2	2	2	2	1	1	1	1	1	1	2	2	1	1	2	2
P06132	P06132	14	14	14	Uroporphyrinogen decarboxylase	UROD	sp|P06132|DCUP_HUMAN Uroporphyrinogen decarboxylase OS=Homo sapiens OX=9606 GN=UROD PE=1 SV=2	1	14	14	14	13	11	11	11	10	7	9	9	8	8	14	14	9	8	13	13	11	11	6	7	9	7	13	11	11	11	10	7	9	9	8	8	14	14	9	8	13	13
P06241;P06241-3;P06241-2;P12931;P12931-2	P06241;P06241-3;P06241-2	8;7;7;1;1	5;4;4;0;0	5;4;4;0;0	Tyrosine-protein kinase Fyn	FYN	sp|P06241|FYN_HUMAN Tyrosine-protein kinase Fyn OS=Homo sapiens OX=9606 GN=FYN PE=1 SV=3;sp|P06241-3|FYN_HUMAN Isoform 3 of Tyrosine-protein kinase Fyn OS=Homo sapiens OX=9606 GN=FYN;sp|P06241-2|FYN_HUMAN Isoform 2 of Tyrosine-protein kinase Fyn OS=Homo sa	5	8	5	5	4	3	6	4	3	3	3	3	3	4	5	4	4	3	6	6	2	2	3	3	3	2	3	3	5	2	2	2	2	2	2	3	4	3	3	3	5	4
P06280	P06280	13	13	13	Alpha-galactosidase A	GLA	sp|P06280|AGAL_HUMAN Alpha-galactosidase A OS=Homo sapiens OX=9606 GN=GLA PE=1 SV=1	1	13	13	13	7	7	7	8	7	7	7	7	8	8	9	9	7	7	9	10	8	9	6	7	5	6	7	7	7	8	7	7	7	7	8	8	9	9	7	7	9	10
P06396-2;P06396-4;P06396	P06396-2;P06396-4;P06396	61;58;58	61;58;58	3;0;0	Gelsolin	GSN	sp|P06396-2|GELS_HUMAN Isoform 2 of Gelsolin OS=Homo sapiens OX=9606 GN=GSN;sp|P06396-4|GELS_HUMAN Isoform 4 of Gelsolin OS=Homo sapiens OX=9606 GN=GSN;sp|P06396|GELS_HUMAN Gelsolin OS=Homo sapiens OX=9606 GN=GSN PE=1 SV=1	3	61	61	3	47	46	50	45	46	50	49	44	47	48	46	46	47	43	44	43	38	40	46	49	50	49	47	46	50	45	46	50	49	44	47	48	46	46	47	43	44	43
P06396-3	P06396-3	59	1	1	Gelsolin	GSN	sp|P06396-3|GELS_HUMAN Isoform 3 of Gelsolin OS=Homo sapiens OX=9606 GN=GSN	1	59	1	1	45	45	48	43	44	48	47	42	45	46	44	44	45	41	43	42	37	39	44	47	47	47	1	1	1	1	1	1	1	1	1	1	1	1	1	1	1	1
P06400	P06400	13	13	13	Retinoblastoma-associated protein	RB1	sp|P06400|RB_HUMAN Retinoblastoma-associated protein OS=Homo sapiens OX=9606 GN=RB1 PE=1 SV=2	1	13	13	13	4	6	9	9	10	11	10	9	10	9	8	9	7	9	10	7	8	10	8	8	6	5	4	6	9	9	10	11	10	9	10	9	8	9	7	9	10	7
P06454-2;P06454	P06454-2;P06454	9;9	9;9	9;9	Prothymosin alpha;Prothymosin alpha, N-terminally processed;Thymosin alpha-1	PTMA	sp|P06454-2|PTMA_HUMAN Isoform 2 of Prothymosin alpha OS=Homo sapiens OX=9606 GN=PTMA;sp|P06454|PTMA_HUMAN Prothymosin alpha OS=Homo sapiens OX=9606 GN=PTMA PE=1 SV=2	2	9	9	9	3	3	5	6	6	8	6	6	7	5	8	7	6	2	4	5	6	7	8	8	6	6	3	3	5	6	6	8	6	6	7	5	8	7	6	2	4	5
P06493;P06493-2;Q96Q40-6;Q96Q40-4;O94921-3;Q96Q40-5;Q96Q40;O94921-2;O94921	P06493;P06493-2	16;13;1;1;1;1;1;1;1	14;12;0;0;0;0;0;0;0	14;12;0;0;0;0;0;0;0	Cyclin-dependent kinase 1	CDK1	sp|P06493|CDK1_HUMAN Cyclin-dependent kinase 1 OS=Homo sapiens OX=9606 GN=CDK1 PE=1 SV=3;sp|P06493-2|CDK1_HUMAN Isoform 2 of Cyclin-dependent kinase 1 OS=Homo sapiens OX=9606 GN=CDK1	9	16	14	14	14	12	15	14	10	14	11	11	11	9	15	14	11	10	15	13	13	13	13	10	13	13	12	10	13	13	10	13	11	11	10	9	13	13	10	9	13	11
P06576	P06576	32	32	32	ATP synthase subunit beta, mitochondrial	ATP5B	sp|P06576|ATPB_HUMAN ATP synthase subunit beta, mitochondrial OS=Homo sapiens OX=9606 GN=ATP5F1B PE=1 SV=3	1	32	32	32	26	26	25	20	25	26	25	25	22	25	25	26	23	23	26	25	24	25	25	24	30	26	26	26	25	20	25	26	25	25	22	25	25	26	23	23	26	25
P06703	P06703	6	6	6	Protein S100-A6	S100A6	sp|P06703|S10A6_HUMAN Protein S100-A6 OS=Homo sapiens OX=9606 GN=S100A6 PE=1 SV=1	1	6	6	6	1	2	3	4	3	2	3	3	2	3	3	3	4	3	3	3	5	3	2	2	2	2	1	2	3	4	3	2	3	3	2	3	3	3	4	3	3	3
P06730;P06730-2;P06730-3;A6NMX2	P06730;P06730-2;P06730-3	9;9;8;1	9;9;8;1	9;9;8;1	Eukaryotic translation initiation factor 4E	EIF4E	sp|P06730|IF4E_HUMAN Eukaryotic translation initiation factor 4E OS=Homo sapiens OX=9606 GN=EIF4E PE=1 SV=2;sp|P06730-2|IF4E_HUMAN Isoform 2 of Eukaryotic translation initiation factor 4E OS=Homo sapiens OX=9606 GN=EIF4E;sp|P06730-3|IF4E_HUMAN Isoform 3 of	4	9	9	9	6	4	6	5	6	7	5	5	6	6	5	6	5	6	6	4	4	4	6	6	7	6	6	4	6	5	6	7	5	5	6	6	5	6	5	6	6	4
P06733	P06733	53	53	17	Alpha-enolase	ENO1	sp|P06733|ENOA_HUMAN Alpha-enolase OS=Homo sapiens OX=9606 GN=ENO1 PE=1 SV=2	1	53	53	17	45	47	42	39	42	41	41	39	40	39	41	40	39	39	41	41	37	37	43	43	48	45	45	47	42	39	42	41	41	39	40	39	41	40	39	39	41	41
P06733-2	P06733-2	37	2	2	Alpha-enolase	ENO1	sp|P06733-2|ENOA_HUMAN Isoform MBP-1 of Alpha-enolase OS=Homo sapiens OX=9606 GN=ENO1	1	37	2	2	30	31	31	28	30	30	30	28	28	28	29	27	28	28	26	27	25	25	31	30	34	33	0	0	1	0	1	1	1	1	1	1	1	0	1	1	0	0
P06737-2;P06737	P06737-2;P06737	63;63	53;53	51;51	Glycogen phosphorylase, liver form	PYGL	sp|P06737-2|PYGL_HUMAN Isoform 2 of Glycogen phosphorylase, liver form OS=Homo sapiens OX=9606 GN=PYGL;sp|P06737|PYGL_HUMAN Glycogen phosphorylase, liver form OS=Homo sapiens OX=9606 GN=PYGL PE=1 SV=4	2	63	53	51	55	53	47	40	42	46	44	43	44	41	49	52	41	42	54	50	45	49	38	44	52	51	46	44	40	34	36	39	37	36	37	35	40	43	35	33	45	42
P06744;P06744-2;Q8N196	P06744;P06744-2	41;38;1	41;38;1	33;30;1	Glucose-6-phosphate isomerase	GPI	sp|P06744|G6PI_HUMAN Glucose-6-phosphate isomerase OS=Homo sapiens OX=9606 GN=GPI PE=1 SV=4;sp|P06744-2|G6PI_HUMAN Isoform 2 of Glucose-6-phosphate isomerase OS=Homo sapiens OX=9606 GN=GPI	3	41	41	33	34	30	33	28	28	30	29	27	29	30	26	28	28	24	28	27	27	31	31	32	35	34	34	30	33	28	28	30	29	27	29	30	26	28	28	24	28	27
P06746	P06746	9	9	9	DNA polymerase beta	POLB	sp|P06746|DPOLB_HUMAN DNA polymerase beta OS=Homo sapiens OX=9606 GN=POLB PE=1 SV=3	1	9	9	9	3	4	2	3	2	3	4	3	3	3	6	5	3	3	5	4	3	3	3	1	3	3	3	4	2	3	2	3	4	3	3	3	6	5	3	3	5	4
P06748;P06748-2;P06748-3	P06748;P06748-2;P06748-3	30;29;25	30;29;25	30;29;25	Nucleophosmin	NPM1	sp|P06748|NPM_HUMAN Nucleophosmin OS=Homo sapiens OX=9606 GN=NPM1 PE=1 SV=2;sp|P06748-2|NPM_HUMAN Isoform 2 of Nucleophosmin OS=Homo sapiens OX=9606 GN=NPM1;sp|P06748-3|NPM_HUMAN Isoform 3 of Nucleophosmin OS=Homo sapiens OX=9606 GN=NPM1	3	30	30	30	19	21	23	24	24	24	29	27	25	26	23	23	24	22	24	20	22	20	25	27	23	22	19	21	23	24	24	24	29	27	25	26	23	23	24	22	24	20
P06753	P06753	26	2	2	Tropomyosin alpha-3 chain	TPM3	sp|P06753|TPM3_HUMAN Tropomyosin alpha-3 chain OS=Homo sapiens OX=9606 GN=TPM3 PE=1 SV=2	1	26	2	2	19	20	21	19	18	19	20	19	19	20	21	20	20	18	19	18	19	18	17	19	20	21	0	1	0	1	0	0	1	0	0	0	1	1	0	0	1	1
P06753-2;P06753-3;P06753-5;P06753-4;P06753-7	P06753-2;P06753-3;P06753-5;P06753-4	40;37;34;31;16	40;37;34;31;16	3;0;3;0;3	Tropomyosin alpha-3 chain	TPM3	sp|P06753-2|TPM3_HUMAN Isoform 2 of Tropomyosin alpha-3 chain OS=Homo sapiens OX=9606 GN=TPM3;sp|P06753-3|TPM3_HUMAN Isoform 3 of Tropomyosin alpha-3 chain OS=Homo sapiens OX=9606 GN=TPM3;sp|P06753-5|TPM3_HUMAN Isoform 5 of Tropomyosin alpha-3 chain OS=Hom	5	40	40	3	33	31	33	34	31	32	31	32	32	33	32	31	33	30	33	33	33	33	32	32	32	31	33	31	33	34	31	32	31	32	32	33	32	31	33	30	33	33
P06753-6	P06753-6	40	3	0	Tropomyosin alpha-3 chain	TPM3	sp|P06753-6|TPM3_HUMAN Isoform 6 of Tropomyosin alpha-3 chain OS=Homo sapiens OX=9606 GN=TPM3	1	40	3	0	33	31	33	31	29	30	30	30	30	31	32	31	32	29	32	31	31	31	29	30	32	31	2	2	2	0	1	1	1	1	1	1	2	2	1	1	1	1
P06756-3;P06756-2;P06756	P06756-3;P06756-2;P06756	15;15;15	15;15;15	15;15;15	Integrin alpha-V;Integrin alpha-V heavy chain;Integrin alpha-V light chain	ITGAV	sp|P06756-3|ITAV_HUMAN Isoform 3 of Integrin alpha-V OS=Homo sapiens OX=9606 GN=ITGAV;sp|P06756-2|ITAV_HUMAN Isoform 2 of Integrin alpha-V OS=Homo sapiens OX=9606 GN=ITGAV;sp|P06756|ITAV_HUMAN Integrin alpha-V OS=Homo sapiens OX=9606 GN=ITGAV PE=1 SV=2	3	15	15	15	8	9	12	13	11	10	12	11	10	9	14	14	12	12	8	9	7	5	11	11	4	5	8	9	12	13	11	10	12	11	10	9	14	14	12	12	8	9
P06865;P06865-2	P06865	17;5	17;5	17;5	Beta-hexosaminidase subunit alpha	HEXA	sp|P06865|HEXA_HUMAN Beta-hexosaminidase subunit alpha OS=Homo sapiens OX=9606 GN=HEXA PE=1 SV=2	2	17	17	17	11	9	8	9	10	11	9	9	7	8	12	12	8	8	13	11	8	8	8	7	8	9	11	9	8	9	10	11	9	9	7	8	12	12	8	8	13	11
P07099	P07099	24	24	24	Epoxide hydrolase 1	EPHX1	sp|P07099|HYEP_HUMAN Epoxide hydrolase 1 OS=Homo sapiens OX=9606 GN=EPHX1 PE=1 SV=1	1	24	24	24	13	14	16	15	16	16	16	15	13	15	16	10	14	11	15	14	13	15	13	15	16	17	13	14	16	15	16	16	16	15	13	15	16	10	14	11	15	14
P07108;P07108-3;P07108-2;P07108-4;P07108-5;P07108-6	P07108;P07108-3;P07108-2;P07108-4;P07108-5	9;7;7;7;7;4	9;7;7;7;7;4	9;7;7;7;7;4	Acyl-CoA-binding protein	DBI	sp|P07108|ACBP_HUMAN Acyl-CoA-binding protein OS=Homo sapiens OX=9606 GN=DBI PE=1 SV=2;sp|P07108-3|ACBP_HUMAN Isoform 3 of Acyl-CoA-binding protein OS=Homo sapiens OX=9606 GN=DBI;sp|P07108-2|ACBP_HUMAN Isoform 2 of Acyl-CoA-binding protein OS=Homo sapiens	6	9	9	9	7	6	9	8	8	9	9	9	9	9	8	9	9	9	9	6	8	9	8	9	9	9	7	6	9	8	8	9	9	9	9	9	8	9	9	9	9	6
P07195	P07195	29	27	27	L-lactate dehydrogenase B chain	LDHB	sp|P07195|LDHB_HUMAN L-lactate dehydrogenase B chain OS=Homo sapiens OX=9606 GN=LDHB PE=1 SV=2	1	29	27	27	26	25	25	22	24	23	23	23	23	24	22	22	25	23	25	26	25	24	25	22	25	25	24	23	23	20	22	21	21	21	21	22	20	20	23	21	23	24
P07199	P07199	3	3	3	Major centromere autoantigen B	CENPB	sp|P07199|CENPB_HUMAN Major centromere autoantigen B OS=Homo sapiens OX=9606 GN=CENPB PE=1 SV=2	1	3	3	3	2	1	2	3	1	1	2	2	1	2	3	1	2	2	1	2	2	2	1	1	2	2	2	1	2	3	1	1	2	2	1	2	3	1	2	2	1	2
P07203;P07203-2	P07203	7;1	7;1	7;1	Glutathione peroxidase 1	GPX1	sp|P07203|GPX1_HUMAN Glutathione peroxidase 1 OS=Homo sapiens OX=9606 GN=GPX1 PE=1 SV=4	2	7	7	7	5	3	5	5	4	4	4	4	4	4	6	5	5	5	5	5	6	5	5	5	5	4	5	3	5	5	4	4	4	4	4	4	6	5	5	5	5	5
P07204	P07204	9	9	9	Thrombomodulin	THBD	sp|P07204|TRBM_HUMAN Thrombomodulin OS=Homo sapiens OX=9606 GN=THBD PE=1 SV=2	1	9	9	9	4	3	8	8	7	8	6	6	7	8	8	8	8	8	7	8	7	6	8	8	5	3	4	3	8	8	7	8	6	6	7	8	8	8	8	8	7	8
P07225;CON__P07224	P07225;CON__P07224	2;1	2;1	2;1	Vitamin K-dependent protein S	PROS1	sp|P07225|PROS_HUMAN Vitamin K-dependent protein S OS=Homo sapiens OX=9606 GN=PROS1 PE=1 SV=1;	2	2	2	2	1	0	1	1	2	2	2	1	2	2	1	1	1	1	1	0	1	1	1	2	1	1	1	0	1	1	2	2	2	1	2	2	1	1	1	1	1	0
P07237	P07237	52	52	52	Protein disulfide-isomerase	P4HB	sp|P07237|PDIA1_HUMAN Protein disulfide-isomerase OS=Homo sapiens OX=9606 GN=P4HB PE=1 SV=3	1	52	52	52	42	42	48	40	36	37	36	37	35	36	42	38	40	39	41	39	35	35	38	38	44	41	42	42	48	40	36	37	36	37	35	36	42	38	40	39	41	39
P07305;P07305-2	P07305;P07305-2	9;6	9;6	9;6	Histone H1.0;Histone H1.0, N-terminally processed	H1F0	sp|P07305|H10_HUMAN Histone H1.0 OS=Homo sapiens OX=9606 GN=H1-0 PE=1 SV=3;sp|P07305-2|H10_HUMAN Isoform 2 of Histone H1.0 OS=Homo sapiens OX=9606 GN=H1-0	2	9	9	9	4	7	4	3	4	3	3	4	4	5	4	5	4	4	5	6	4	4	3	3	7	7	4	7	4	3	4	3	3	4	4	5	4	5	4	4	5	6
P07311;P07311-2	P07311	9;2	9;2	9;2	Acylphosphatase-1	ACYP1	sp|P07311|ACYP1_HUMAN Acylphosphatase-1 OS=Homo sapiens OX=9606 GN=ACYP1 PE=1 SV=2	2	9	9	9	8	6	3	5	3	3	4	4	4	2	6	6	4	4	7	7	6	6	3	2	5	4	8	6	3	5	3	3	4	4	4	2	6	6	4	4	7	7
P07339	P07339	33	33	33	Cathepsin D;Cathepsin D light chain;Cathepsin D heavy chain	CTSD	sp|P07339|CATD_HUMAN Cathepsin D OS=Homo sapiens OX=9606 GN=CTSD PE=1 SV=1	1	33	33	33	29	28	26	23	23	22	20	23	21	20	26	25	22	21	30	27	26	23	21	22	26	24	29	28	26	23	23	22	20	23	21	20	26	25	22	21	30	27
P07355;P07355-2;A6NMY6	P07355;P07355-2;A6NMY6	47;46;33	47;46;33	47;46;33	Annexin A2;Putative annexin A2-like protein	ANXA2;ANXA2P2	sp|P07355|ANXA2_HUMAN Annexin A2 OS=Homo sapiens OX=9606 GN=ANXA2 PE=1 SV=2;sp|P07355-2|ANXA2_HUMAN Isoform 2 of Annexin A2 OS=Homo sapiens OX=9606 GN=ANXA2;sp|A6NMY6|AXA2L_HUMAN Putative annexin A2-like protein OS=Homo sapiens OX=9606 GN=ANXA2P2 PE=5 SV=2	3	47	47	47	38	38	34	30	30	30	26	28	30	28	31	31	29	32	31	36	31	32	32	32	43	42	38	38	34	30	30	30	26	28	30	28	31	31	29	32	31	36
P07384	P07384	13	13	13	Calpain-1 catalytic subunit	CAPN1	sp|P07384|CAN1_HUMAN Calpain-1 catalytic subunit OS=Homo sapiens OX=9606 GN=CAPN1 PE=1 SV=1	1	13	13	13	7	7	6	5	6	5	6	5	5	5	8	6	5	4	8	6	3	6	3	4	3	3	7	7	6	5	6	5	6	5	5	5	8	6	5	4	8	6
P07437;A6NNZ2	P07437	40;10	7;0	7;0	Tubulin beta chain	TUBB	sp|P07437|TBB5_HUMAN Tubulin beta chain OS=Homo sapiens OX=9606 GN=TUBB PE=1 SV=2	2	40	7	7	34	33	36	34	35	34	31	34	33	31	35	33	35	33	33	33	31	31	30	32	39	37	6	6	6	6	5	5	5	5	5	5	6	6	6	6	6	6
P07602;P07602-2;P07602-3	P07602;P07602-2;P07602-3	25;24;24	25;24;24	25;24;24	Prosaposin;Saposin-A;Saposin-B-Val;Saposin-B;Saposin-C;Saposin-D	PSAP	sp|P07602|SAP_HUMAN Prosaposin OS=Homo sapiens OX=9606 GN=PSAP PE=1 SV=2;sp|P07602-2|SAP_HUMAN Isoform Sap-mu-6 of Prosaposin OS=Homo sapiens OX=9606 GN=PSAP;sp|P07602-3|SAP_HUMAN Isoform Sap-mu-9 of Prosaposin OS=Homo sapiens OX=9606 GN=PSAP	3	25	25	25	18	16	17	15	12	13	13	12	12	15	19	19	15	16	19	20	15	12	11	11	2	3	18	16	17	15	12	13	13	12	12	15	19	19	15	16	19	20
P07686	P07686	20	20	20	Beta-hexosaminidase subunit beta;Beta-hexosaminidase subunit beta chain B;Beta-hexosaminidase subunit beta chain A	HEXB	sp|P07686|HEXB_HUMAN Beta-hexosaminidase subunit beta OS=Homo sapiens OX=9606 GN=HEXB PE=1 SV=3	1	20	20	20	13	17	16	13	15	14	15	15	13	14	18	18	15	14	16	17	10	11	12	14	13	14	13	17	16	13	15	14	15	15	13	14	18	18	15	14	16	17
P07711	P07711	4	4	4	Cathepsin L1;Cathepsin L1 heavy chain;Cathepsin L1 light chain	CTSL	sp|P07711|CATL1_HUMAN Cathepsin L1 OS=Homo sapiens OX=9606 GN=CTSL PE=1 SV=2	1	4	4	4	0	1	2	1	2	2	2	1	2	3	1	1	1	1	1	1	2	1	3	2	2	2	0	1	2	1	2	2	2	1	2	3	1	1	1	1	1	1
P07737;CON__P02584	P07737	21;6	21;6	21;6	Profilin-1	PFN1	sp|P07737|PROF1_HUMAN Profilin-1 OS=Homo sapiens OX=9606 GN=PFN1 PE=1 SV=2	2	21	21	21	18	18	17	15	17	16	15	15	13	15	18	18	16	15	17	16	17	18	15	14	19	18	18	18	17	15	17	16	15	15	13	15	18	18	16	15	17	16
P07738	P07738	10	10	10	Bisphosphoglycerate mutase	BPGM	sp|P07738|PMGE_HUMAN Bisphosphoglycerate mutase OS=Homo sapiens OX=9606 GN=BPGM PE=1 SV=2	1	10	10	10	7	5	3	5	3	3	3	5	3	4	6	4	5	4	6	4	2	4	4	3	6	6	7	5	3	5	3	3	3	5	3	4	6	4	5	4	6	4
P07741;P07741-2	P07741;P07741-2	10;9	10;9	10;9	Adenine phosphoribosyltransferase	APRT	sp|P07741|APT_HUMAN Adenine phosphoribosyltransferase OS=Homo sapiens OX=9606 GN=APRT PE=1 SV=2;sp|P07741-2|APT_HUMAN Isoform 2 of Adenine phosphoribosyltransferase OS=Homo sapiens OX=9606 GN=APRT	2	10	10	10	5	6	7	5	5	5	5	5	5	5	7	7	6	6	6	5	6	5	5	4	8	8	5	6	7	5	5	5	5	5	5	5	7	7	6	6	6	5
P07814	P07814	100	100	100	Bifunctional glutamate/proline--tRNA ligase;Glutamate--tRNA ligase;Proline--tRNA ligase	EPRS	sp|P07814|SYEP_HUMAN Bifunctional glutamate/proline--tRNA ligase OS=Homo sapiens OX=9606 GN=EPRS1 PE=1 SV=5	1	100	100	100	71	72	75	72	71	70	72	62	69	65	72	76	74	63	74	68	69	69	66	63	62	61	71	72	75	72	71	70	72	62	69	65	72	76	74	63	74	68
P07858	P07858	14	14	14	Cathepsin B;Cathepsin B light chain;Cathepsin B heavy chain	CTSB	sp|P07858|CATB_HUMAN Cathepsin B OS=Homo sapiens OX=9606 GN=CTSB PE=1 SV=3	1	14	14	14	13	9	12	13	10	10	10	10	11	10	13	13	12	12	12	10	10	9	9	11	10	10	13	9	12	13	10	10	10	10	11	10	13	13	12	12	12	10
P07900-2;P07900;Q14568	P07900-2;P07900	78;78;9	54;54;1	48;48;1	Heat shock protein HSP 90-alpha	HSP90AA1	sp|P07900-2|HS90A_HUMAN Isoform 2 of Heat shock protein HSP 90-alpha OS=Homo sapiens OX=9606 GN=HSP90AA1;sp|P07900|HS90A_HUMAN Heat shock protein HSP 90-alpha OS=Homo sapiens OX=9606 GN=HSP90AA1 PE=1 SV=5	3	78	54	48	61	63	58	60	54	54	56	55	55	53	59	62	58	57	61	61	55	61	57	55	63	61	42	43	40	42	38	40	40	40	40	39	40	42	42	41	41	42
P07910-2;P07910;P07910-4;O60812;P0DMR1;B7ZW38;Q86SE5;Q86SE5-3	P07910-2;P07910;P07910-4	25;23;22;12;11;11;1;1	25;23;22;12;11;11;1;1	6;4;6;0;0;0;1;1	Heterogeneous nuclear ribonucleoproteins C1/C2	HNRNPC	sp|P07910-2|HNRPC_HUMAN Isoform C1 of Heterogeneous nuclear ribonucleoproteins C1/C2 OS=Homo sapiens OX=9606 GN=HNRNPC;sp|P07910|HNRPC_HUMAN Heterogeneous nuclear ribonucleoproteins C1/C2 OS=Homo sapiens OX=9606 GN=HNRNPC PE=1 SV=4;sp|P07910-4|HNRPC_HUMAN	8	25	25	6	22	22	22	20	20	19	21	20	20	18	20	19	18	17	21	20	19	19	19	19	20	21	22	22	22	20	20	19	21	20	20	18	20	19	18	17	21	20
P07919;A0A096LP55	P07919	5;1	5;1	5;1	Cytochrome b-c1 complex subunit 6, mitochondrial	UQCRH	sp|P07919|QCR6_HUMAN Cytochrome b-c1 complex subunit 6, mitochondrial OS=Homo sapiens OX=9606 GN=UQCRH PE=1 SV=2	2	5	5	5	2	2	1	2	1	1	1	1	1	1	2	1	1	1	2	2	1	2	1	1	2	2	2	2	1	2	1	1	1	1	1	1	2	1	1	1	2	2
P07942	P07942	26	26	26	Laminin subunit beta-1	LAMB1	sp|P07942|LAMB1_HUMAN Laminin subunit beta-1 OS=Homo sapiens OX=9606 GN=LAMB1 PE=1 SV=2	1	26	26	26	6	6	15	16	16	14	16	17	17	16	14	16	13	13	13	8	11	17	18	16	6	5	6	6	15	16	16	14	16	17	17	16	14	16	13	13	13	8
P07947	P07947	9	9	6	Tyrosine-protein kinase Yes	YES1	sp|P07947|YES_HUMAN Tyrosine-protein kinase Yes OS=Homo sapiens OX=9606 GN=YES1 PE=1 SV=3	1	9	9	6	1	1	5	5	2	4	3	4	4	4	4	4	5	5	4	4	4	5	4	4	2	3	1	1	5	5	2	4	3	4	4	4	4	4	5	5	4	4
P07954-2;P07954	P07954-2;P07954	19;19	19;19	19;19	Fumarate hydratase, mitochondrial	FH	sp|P07954-2|FUMH_HUMAN Isoform Cytoplasmic of Fumarate hydratase, mitochondrial OS=Homo sapiens OX=9606 GN=FH;sp|P07954|FUMH_HUMAN Fumarate hydratase, mitochondrial OS=Homo sapiens OX=9606 GN=FH PE=1 SV=3	2	19	19	19	13	15	16	15	15	15	15	14	15	16	14	16	15	13	13	14	13	16	14	14	17	17	13	15	16	15	15	15	15	14	15	16	14	16	15	13	13	14
P08034	P08034	2	2	2	Gap junction beta-1 protein	GJB1	sp|P08034|CXB1_HUMAN Gap junction beta-1 protein OS=Homo sapiens OX=9606 GN=GJB1 PE=1 SV=1	1	2	2	2	0	0	1	1	1	1	1	1	1	1	0	1	1	0	1	0	0	1	1	1	1	1	0	0	1	1	1	1	1	1	1	1	0	1	1	0	1	0
P08047-3;P08047;P08047-2	P08047-3;P08047;P08047-2	3;3;2	3;3;2	3;3;2	Transcription factor Sp1	SP1	sp|P08047-3|SP1_HUMAN Isoform 3 of Transcription factor Sp1 OS=Homo sapiens OX=9606 GN=SP1;sp|P08047|SP1_HUMAN Transcription factor Sp1 OS=Homo sapiens OX=9606 GN=SP1 PE=1 SV=3;sp|P08047-2|SP1_HUMAN Isoform 2 of Transcription factor Sp1 OS=Homo sapiens OX=	3	3	3	3	1	0	1	1	2	3	3	2	1	2	2	2	2	2	1	1	1	1	1	1	1	1	1	0	1	1	2	3	3	2	1	2	2	2	2	2	1	1
P08069	P08069	5	5	5	Insulin-like growth factor 1 receptor;Insulin-like growth factor 1 receptor alpha chain;Insulin-like growth factor 1 receptor beta chain	IGF1R	sp|P08069|IGF1R_HUMAN Insulin-like growth factor 1 receptor OS=Homo sapiens OX=9606 GN=IGF1R PE=1 SV=1	1	5	5	5	2	1	3	3	3	3	3	2	3	3	2	4	2	2	3	3	2	3	3	2	4	3	2	1	3	3	3	3	3	2	3	3	2	4	2	2	3	3
P08133;P08133-2	P08133;P08133-2	59;57	59;57	59;57	Annexin A6	ANXA6	sp|P08133|ANXA6_HUMAN Annexin A6 OS=Homo sapiens OX=9606 GN=ANXA6 PE=1 SV=3;sp|P08133-2|ANXA6_HUMAN Isoform 2 of Annexin A6 OS=Homo sapiens OX=9606 GN=ANXA6	2	59	59	59	44	44	46	46	44	42	46	44	42	42	48	46	45	40	44	39	36	38	40	43	47	44	44	44	46	46	44	42	46	44	42	42	48	46	45	40	44	39
P08134	P08134	14	4	4	Rho-related GTP-binding protein RhoC	RHOC	sp|P08134|RHOC_HUMAN Rho-related GTP-binding protein RhoC OS=Homo sapiens OX=9606 GN=RHOC PE=1 SV=1	1	14	4	4	9	10	10	9	10	10	9	7	8	9	10	11	10	9	10	11	9	9	10	8	7	7	2	3	2	2	3	4	1	2	1	2	2	3	2	1	1	3
P08138-2;P08138	P08138-2;P08138	2;2	2;2	2;2	Tumor necrosis factor receptor superfamily member 16	NGFR	sp|P08138-2|TNR16_HUMAN Isoform 2 of Tumor necrosis factor receptor superfamily member 16 OS=Homo sapiens OX=9606 GN=NGFR;sp|P08138|TNR16_HUMAN Tumor necrosis factor receptor superfamily member 16 OS=Homo sapiens OX=9606 GN=NGFR PE=1 SV=1	2	2	2	2	1	0	2	2	0	0	1	1	1	0	2	2	2	2	2	1	1	0	1	0	0	1	1	0	2	2	0	0	1	1	1	0	2	2	2	2	2	1
P08174-4;P08174;P08174-3;P08174-5;P08174-2;P08174-6;P08174-7	P08174-4;P08174;P08174-3;P08174-5;P08174-2;P08174-6;P08174-7	3;3;3;3;3;3;3	3;3;3;3;3;3;3	3;3;3;3;3;3;3	Complement decay-accelerating factor	CD55	sp|P08174-4|DAF_HUMAN Isoform 4 of Complement decay-accelerating factor OS=Homo sapiens OX=9606 GN=CD55;sp|P08174|DAF_HUMAN Complement decay-accelerating factor OS=Homo sapiens OX=9606 GN=CD55 PE=1 SV=4;sp|P08174-3|DAF_HUMAN Isoform 3 of Complement decay-a	7	3	3	3	0	0	0	0	1	0	1	1	0	0	0	0	1	1	1	1	0	1	0	1	0	0	0	0	0	0	1	0	1	1	0	0	0	0	1	1	1	1
P08195-3;P08195;P08195-4	P08195-3;P08195;P08195-4	32;32;32	1;1;1	1;1;1	4F2 cell-surface antigen heavy chain	SLC3A2	sp|P08195-3|4F2_HUMAN Isoform 3 of 4F2 cell-surface antigen heavy chain OS=Homo sapiens OX=9606 GN=SLC3A2;sp|P08195|4F2_HUMAN 4F2 cell-surface antigen heavy chain OS=Homo sapiens OX=9606 GN=SLC3A2 PE=1 SV=3;sp|P08195-4|4F2_HUMAN Isoform 4 of 4F2 cell-surfa	3	32	1	1	22	21	23	22	25	25	22	23	20	19	26	27	22	21	24	25	20	23	22	21	27	25	0	0	1	0	0	0	0	0	0	0	1	1	0	1	0	0
P08195-2	P08195-2	32	32	1	4F2 cell-surface antigen heavy chain	SLC3A2	sp|P08195-2|4F2_HUMAN Isoform 2 of 4F2 cell-surface antigen heavy chain OS=Homo sapiens OX=9606 GN=SLC3A2	1	32	32	1	23	22	23	23	26	26	23	24	21	20	26	27	23	21	25	26	21	24	23	22	27	25	23	22	23	23	26	26	23	24	21	20	26	27	23	21	25	26
P08237-3;P08237;P08237-2	P08237-3;P08237;P08237-2	34;34;32	31;31;30	30;30;30	ATP-dependent 6-phosphofructokinase, muscle type	PFKM	sp|P08237-3|PFKAM_HUMAN Isoform 3 of ATP-dependent 6-phosphofructokinase, muscle type OS=Homo sapiens OX=9606 GN=PFKM;sp|P08237|PFKAM_HUMAN ATP-dependent 6-phosphofructokinase, muscle type OS=Homo sapiens OX=9606 GN=PFKM PE=1 SV=2;sp|P08237-2|PFKAM_HUMAN I	3	34	31	30	24	20	19	19	21	21	21	19	17	19	23	24	15	16	23	24	19	22	16	17	19	22	21	18	18	18	20	20	20	18	16	18	21	22	14	16	21	22
P08238;Q58FF7	P08238	84;34	84;34	53;17	Heat shock protein HSP 90-beta	HSP90AB1	sp|P08238|HS90B_HUMAN Heat shock protein HSP 90-beta OS=Homo sapiens OX=9606 GN=HSP90AB1 PE=1 SV=4	2	84	84	53	67	68	65	62	61	62	62	60	60	63	65	65	60	58	67	60	65	65	56	61	74	75	67	68	65	62	61	62	62	60	60	63	65	65	60	58	67	60
P08240;P08240-2	P08240;P08240-2	17;16	17;16	17;16	Signal recognition particle receptor subunit alpha	SRPR	sp|P08240|SRPRA_HUMAN Signal recognition particle receptor subunit alpha OS=Homo sapiens OX=9606 GN=SRPRA PE=1 SV=2;sp|P08240-2|SRPRA_HUMAN Isoform 2 of Signal recognition particle receptor subunit alpha OS=Homo sapiens OX=9606 GN=SRPRA	2	17	17	17	13	13	12	13	12	13	11	12	12	11	17	16	13	13	13	14	5	8	10	7	12	10	13	13	12	13	12	13	11	12	12	11	17	16	13	13	13	14
P08243;P08243-2;P08243-3	P08243;P08243-2;P08243-3	8;8;7	8;8;7	8;8;7	Asparagine synthetase [glutamine-hydrolyzing]	ASNS	sp|P08243|ASNS_HUMAN Asparagine synthetase [glutamine-hydrolyzing] OS=Homo sapiens OX=9606 GN=ASNS PE=1 SV=4;sp|P08243-2|ASNS_HUMAN Isoform 2 of Asparagine synthetase [glutamine-hydrolyzing] OS=Homo sapiens OX=9606 GN=ASNS;sp|P08243-3|ASNS_HUMAN Isoform 3	3	8	8	8	7	6	7	7	3	3	4	3	3	4	6	5	4	3	3	2	4	4	4	5	4	5	7	6	7	7	3	3	4	3	3	4	6	5	4	3	3	2
P08397;P08397-3;P08397-2;P08397-4	P08397;P08397-3;P08397-2;P08397-4	6;5;5;4	6;5;5;4	6;5;5;4	Porphobilinogen deaminase	HMBS	sp|P08397|HEM3_HUMAN Porphobilinogen deaminase OS=Homo sapiens OX=9606 GN=HMBS PE=1 SV=2;sp|P08397-3|HEM3_HUMAN Isoform 3 of Porphobilinogen deaminase OS=Homo sapiens OX=9606 GN=HMBS;sp|P08397-2|HEM3_HUMAN Isoform 2 of Porphobilinogen deaminase OS=Homo sap	4	6	6	6	2	4	3	4	4	4	4	4	4	4	4	3	4	4	3	4	2	1	4	4	3	4	2	4	3	4	4	4	4	4	4	4	4	3	4	4	3	4
P08473	P08473	11	11	11	Neprilysin	MME	sp|P08473|NEP_HUMAN Neprilysin OS=Homo sapiens OX=9606 GN=MME PE=1 SV=2	1	11	11	11	7	5	5	7	5	5	5	6	6	6	8	9	6	4	8	5	5	7	4	3	7	7	7	5	5	7	5	5	5	6	6	6	8	9	6	4	8	5
P08559;P08559-4;P08559-3;P08559-2;P29803	P08559;P08559-4;P08559-3;P08559-2	27;27;26;26;6	27;27;26;26;6	27;27;26;26;6	Pyruvate dehydrogenase E1 component subunit alpha, somatic form, mitochondrial	PDHA1	sp|P08559|ODPA_HUMAN Pyruvate dehydrogenase E1 component subunit alpha, somatic form, mitochondrial OS=Homo sapiens OX=9606 GN=PDHA1 PE=1 SV=3;sp|P08559-4|ODPA_HUMAN Isoform 4 of Pyruvate dehydrogenase E1 component subunit alpha, somatic form, mitochondria	5	27	27	27	21	19	18	18	17	18	17	18	19	15	22	22	16	12	19	19	14	16	16	15	13	14	21	19	18	18	17	18	17	18	19	15	22	22	16	12	19	19
P08572	P08572	11	11	11	Collagen alpha-2(IV) chain;Canstatin	COL4A2	sp|P08572|CO4A2_HUMAN Collagen alpha-2(IV) chain OS=Homo sapiens OX=9606 GN=COL4A2 PE=1 SV=4	1	11	11	11	6	5	9	8	7	7	8	8	6	7	9	9	9	9	8	9	5	6	4	5	4	2	6	5	9	8	7	7	8	8	6	7	9	9	9	9	8	9
P08574	P08574	7	7	7	Cytochrome c1, heme protein, mitochondrial	CYC1	sp|P08574|CY1_HUMAN Cytochrome c1, heme protein, mitochondrial OS=Homo sapiens OX=9606 GN=CYC1 PE=1 SV=3	1	7	7	7	5	5	5	5	5	4	5	5	6	5	6	5	5	6	7	6	4	4	5	5	4	4	5	5	5	5	5	4	5	5	6	5	6	5	5	6	7	6
P08579	P08579	4	3	3	U2 small nuclear ribonucleoprotein B	SNRPB2	sp|P08579|RU2B_HUMAN U2 small nuclear ribonucleoprotein B OS=Homo sapiens OX=9606 GN=SNRPB2 PE=1 SV=1	1	4	3	3	3	3	3	3	3	3	3	3	3	2	2	3	3	3	3	2	3	3	3	2	3	3	3	3	3	3	3	3	3	3	3	2	2	3	3	3	3	2
P08582;P08582-2	P08582	15;5	15;5	15;5	Melanotransferrin	MFI2	sp|P08582|TRFM_HUMAN Melanotransferrin OS=Homo sapiens OX=9606 GN=MELTF PE=1 SV=2	2	15	15	15	8	7	10	7	8	7	6	6	5	5	11	9	7	9	10	8	5	3	1	3	3	3	8	7	10	7	8	7	6	6	5	5	11	9	7	9	10	8
P08621;P08621-2;P08621-3;P08621-4	P08621;P08621-2;P08621-3	24;21;13;9	24;21;13;9	24;21;13;9	U1 small nuclear ribonucleoprotein 70 kDa	SNRNP70	sp|P08621|RU17_HUMAN U1 small nuclear ribonucleoprotein 70 kDa OS=Homo sapiens OX=9606 GN=SNRNP70 PE=1 SV=2;sp|P08621-2|RU17_HUMAN Isoform 2 of U1 small nuclear ribonucleoprotein 70 kDa OS=Homo sapiens OX=9606 GN=SNRNP70;sp|P08621-3|RU17_HUMAN Isoform 3 of	4	24	24	24	14	14	17	15	17	16	17	18	15	15	16	18	16	16	14	14	16	15	13	15	13	13	14	14	17	15	17	16	17	18	15	15	16	18	16	16	14	14
P08648	P08648	4	4	4	Integrin alpha-5;Integrin alpha-5 heavy chain;Integrin alpha-5 light chain	ITGA5	sp|P08648|ITA5_HUMAN Integrin alpha-5 OS=Homo sapiens OX=9606 GN=ITGA5 PE=1 SV=2	1	4	4	4	2	1	4	1	3	3	2	3	2	2	2	3	1	0	2	3	2	1	0	2	2	2	2	1	4	1	3	3	2	3	2	2	2	3	1	0	2	3
P08651-4;P08651-5;P08651-3;P08651-6;P08651-2;P08651	P08651-4;P08651-5;P08651-3;P08651-6;P08651-2;P08651	7;7;7;7;7;7	7;7;7;7;7;7	7;7;7;7;7;7	Nuclear factor 1 C-type	NFIC	sp|P08651-4|NFIC_HUMAN Isoform 3 of Nuclear factor 1 C-type OS=Homo sapiens OX=9606 GN=NFIC;sp|P08651-5|NFIC_HUMAN Isoform 5 of Nuclear factor 1 C-type OS=Homo sapiens OX=9606 GN=NFIC;sp|P08651-3|NFIC_HUMAN Isoform 2 of Nuclear factor 1 C-type OS=Homo sapi	6	7	7	7	2	2	6	7	6	6	6	6	5	6	6	7	6	5	4	4	2	4	6	6	4	3	2	2	6	7	6	6	6	6	5	6	6	7	6	5	4	4
P08670;P41219;P41219-2;CON__H-INV:HIT000292931;CON__Q9H552;CON__Q8N1N4-2;CON__Q7RTT2;Q16352;Q8N1N4;P07197-2;P07197;P07196	P08670	88;6;6;2;2;2;2;2;2;2;2;1	88;6;6;2;2;2;2;2;2;2;2;1	79;4;4;0;0;0;0;0;0;0;0;0	Vimentin	VIM	sp|P08670|VIME_HUMAN Vimentin OS=Homo sapiens OX=9606 GN=VIM PE=1 SV=4	12	88	88	79	75	73	77	72	69	70	70	69	71	73	74	75	77	73	76	75	72	73	73	73	80	81	75	73	77	72	69	70	70	69	71	73	74	75	77	73	76	75
62;1005663;1005664;1005665;1005666;1005667;1005668;1005669;1005670;1005671;1005672;1005673;1005674;1005675;1005676;1005677;1005678;1005679;1005680;1005681;1005682;1005683;1005684;1005685;1005686;1005687;1006217;1006218;1006219;1006220;1006221;1006222;1006223;1006224;1006225;1006226;1006227;1006228;1006229;1006230;1006231;1006232;1006233;1006234;1006235;1006236;1006237;1006238;1006239;1006240;1006…	54978;54979;54980;54981;54982;54983;54984;54985;54986;54987;54988;54989;54990;54991;54992;54993;54994;54995;54996;54997;54998;54999;55000;55001;55002;55003;55004;55005;55006;55007;55008;55009;93794;93795;93796;93797;93798;93799;93800;93801;93802;93803;93804;93805;93806;93807;93808;93809;93810;93811;93812;93813;93814;93815;93816;93817;93818;93819;93820;93821;93822;93823;93824;93825;93826;93827;938…	54985;93794;106258;113773;122602;122635;133695;133712;141729;141755;141785;151530;151547;156963;157898;157925;157967;159037;159059;173189;173224;248766;288759;288817;304328;304385;304409;335841;336274;336291;348248;348281;373417;373463;373507;380090;380201;396719;402731;402848;415598;415627;416365;416374;416440;424050;445679;445701;453027;453081;492346;492360;509339;514231;517414;518493;532461;53…	42;43;44;45;46;47	154;193;347;372;376;391	9606;9606;9606;-1;-1;-1;-1;9606;9606;9606;9606;9606
P08708	P08708	15	15	15	40S ribosomal protein S17	RPS17	sp|P08708|RS17_HUMAN 40S ribosomal protein S17 OS=Homo sapiens OX=9606 GN=RPS17 PE=1 SV=2	1	15	15	15	10	10	12	7	8	9	9	9	9	10	10	11	9	7	9	9	7	9	9	9	13	13	10	10	12	7	8	9	9	9	9	10	10	11	9	7	9	9
P08754	P08754	20	14	13	Guanine nucleotide-binding protein G(k) subunit alpha	GNAI3	sp|P08754|GNAI3_HUMAN Guanine nucleotide-binding protein G(i) subunit alpha OS=Homo sapiens OX=9606 GN=GNAI3 PE=1 SV=3	1	20	14	13	10	12	10	8	7	6	6	7	6	7	12	12	8	7	13	10	9	11	5	7	11	11	6	8	6	6	4	4	3	4	4	4	8	7	5	4	8	7
P08758	P08758	35	35	35	Annexin A5	ANXA5	sp|P08758|ANXA5_HUMAN Annexin A5 OS=Homo sapiens OX=9606 GN=ANXA5 PE=1 SV=2	1	35	35	35	28	28	24	20	24	25	23	20	21	23	25	23	22	20	24	24	25	23	21	22	30	30	28	28	24	20	24	25	23	20	21	23	25	23	22	20	24	24
P08865	P08865	21	21	21	40S ribosomal protein SA	RPSA	sp|P08865|RSSA_HUMAN 40S ribosomal protein SA OS=Homo sapiens OX=9606 GN=RPSA PE=1 SV=4	1	21	21	21	18	18	18	16	16	15	15	16	16	15	17	18	16	16	18	17	17	17	16	15	17	17	18	18	18	16	16	15	15	16	16	15	17	18	16	16	18	17
P08962-3;P08962-2;P08962	P08962-3;P08962-2;P08962	2;2;2	2;2;2	2;2;2	CD63 antigen	CD63	sp|P08962-3|CD63_HUMAN Isoform 3 of CD63 antigen OS=Homo sapiens OX=9606 GN=CD63;sp|P08962-2|CD63_HUMAN Isoform 2 of CD63 antigen OS=Homo sapiens OX=9606 GN=CD63;sp|P08962|CD63_HUMAN CD63 antigen OS=Homo sapiens OX=9606 GN=CD63 PE=1 SV=2	3	2	2	2	1	2	1	2	2	2	1	2	2	2	2	2	1	1	2	1	1	1	2	2	0	1	1	2	1	2	2	2	1	2	2	2	2	2	1	1	2	1
P09001	P09001	8	8	8	39S ribosomal protein L3, mitochondrial	MRPL3	sp|P09001|RM03_HUMAN 39S ribosomal protein L3, mitochondrial OS=Homo sapiens OX=9606 GN=MRPL3 PE=1 SV=1	1	8	8	8	8	5	4	5	6	5	4	6	5	4	6	7	6	6	7	5	7	5	4	4	4	5	8	5	4	5	6	5	4	6	5	4	6	7	6	6	7	5
P09012	P09012	8	8	7	U1 small nuclear ribonucleoprotein A	SNRPA	sp|P09012|SNRPA_HUMAN U1 small nuclear ribonucleoprotein A OS=Homo sapiens OX=9606 GN=SNRPA PE=1 SV=3	1	8	8	7	3	5	5	5	5	5	5	5	6	5	5	5	4	4	6	4	4	7	5	5	2	4	3	5	5	5	5	5	5	5	6	5	5	5	4	4	6	4
P09104;P09104-2	P09104;P09104-2	30;27	27;25	26;24	Gamma-enolase	ENO2	sp|P09104|ENOG_HUMAN Gamma-enolase OS=Homo sapiens OX=9606 GN=ENO2 PE=1 SV=3;sp|P09104-2|ENOG_HUMAN Isoform 2 of Gamma-enolase OS=Homo sapiens OX=9606 GN=ENO2	2	30	27	26	21	20	17	17	16	14	16	16	18	16	19	16	15	15	18	19	14	15	16	17	20	21	18	17	15	15	14	12	14	14	16	14	16	14	13	13	16	16
P09110;P09110-2	P09110;P09110-2	12;7	12;7	12;7	3-ketoacyl-CoA thiolase, peroxisomal	ACAA1	sp|P09110|THIK_HUMAN 3-ketoacyl-CoA thiolase, peroxisomal OS=Homo sapiens OX=9606 GN=ACAA1 PE=1 SV=2;sp|P09110-2|THIK_HUMAN Isoform 2 of 3-ketoacyl-CoA thiolase, peroxisomal OS=Homo sapiens OX=9606 GN=ACAA1	2	12	12	12	8	6	7	7	7	7	7	7	6	5	10	9	5	5	11	10	8	8	7	6	7	8	8	6	7	7	7	7	7	7	6	5	10	9	5	5	11	10
P09132;P09132-2	P09132;P09132-2	10;5	10;5	10;5	Signal recognition particle 19 kDa protein	SRP19	sp|P09132|SRP19_HUMAN Signal recognition particle 19 kDa protein OS=Homo sapiens OX=9606 GN=SRP19 PE=1 SV=3;sp|P09132-2|SRP19_HUMAN Isoform 2 of Signal recognition particle 19 kDa protein OS=Homo sapiens OX=9606 GN=SRP19	2	10	10	10	6	4	6	6	6	6	6	6	5	5	8	8	5	5	8	6	6	6	6	5	2	3	6	4	6	6	6	6	6	6	5	5	8	8	5	5	8	6
P09211	P09211	20	20	20	Glutathione S-transferase P	GSTP1	sp|P09211|GSTP1_HUMAN Glutathione S-transferase P OS=Homo sapiens OX=9606 GN=GSTP1 PE=1 SV=2	1	20	20	20	17	17	17	16	16	16	17	16	16	16	17	17	16	16	17	16	17	15	17	17	17	18	17	17	17	16	16	16	17	16	16	16	17	17	16	16	17	16
P09234	P09234	8	8	8	U1 small nuclear ribonucleoprotein C	SNRPC	sp|P09234|RU1C_HUMAN U1 small nuclear ribonucleoprotein C OS=Homo sapiens OX=9606 GN=SNRPC PE=1 SV=1	1	8	8	8	4	5	5	5	5	7	8	7	6	7	8	6	6	5	6	5	5	6	8	7	4	4	4	5	5	5	5	7	8	7	6	7	8	6	6	5	6	5
P09382	P09382	16	16	16	Galectin-1	LGALS1	sp|P09382|LEG1_HUMAN Galectin-1 OS=Homo sapiens OX=9606 GN=LGALS1 PE=1 SV=2	1	16	16	16	14	14	15	15	15	15	16	14	15	14	15	15	15	16	15	15	14	14	13	16	16	16	14	14	15	15	15	15	16	14	15	14	15	15	15	16	15	15
P09417;P09417-2	P09417;P09417-2	12;11	12;11	12;11	Dihydropteridine reductase	QDPR	sp|P09417|DHPR_HUMAN Dihydropteridine reductase OS=Homo sapiens OX=9606 GN=QDPR PE=1 SV=2;sp|P09417-2|DHPR_HUMAN Isoform 2 of Dihydropteridine reductase OS=Homo sapiens OX=9606 GN=QDPR	2	12	12	12	10	8	10	10	10	11	10	10	8	8	10	9	8	8	10	8	11	9	8	7	9	9	10	8	10	10	10	11	10	10	8	8	10	9	8	8	10	8
P09429	P09429	24	24	10	High mobility group protein B1	HMGB1	sp|P09429|HMGB1_HUMAN High mobility group protein B1 OS=Homo sapiens OX=9606 GN=HMGB1 PE=1 SV=3	1	24	24	10	19	20	23	23	24	24	23	24	24	24	19	21	24	21	21	17	18	20	23	23	22	21	19	20	23	23	24	24	23	24	24	24	19	21	24	21	21	17
P09466-3;P09466-2;P09466	P09466-3;P09466-2;P09466	1;1;1	1;1;1	1;1;1	Glycodelin	PAEP	sp|P09466-3|PAEP_HUMAN Isoform 3 of Glycodelin OS=Homo sapiens OX=9606 GN=PAEP;sp|P09466-2|PAEP_HUMAN Isoform 2 of Glycodelin OS=Homo sapiens OX=9606 GN=PAEP;sp|P09466|PAEP_HUMAN Glycodelin OS=Homo sapiens OX=9606 GN=PAEP PE=1 SV=2	3	1	1	1	1	1	1	0	1	1	1	1	1	1	1	0	1	1	1	1	1	1	1	1	1	1	1	1	1	0	1	1	1	1	1	1	1	0	1	1	1	1
P09471-2;P09471	P09471-2;P09471	15;12	10;10	10;10	Guanine nucleotide-binding protein G(o) subunit alpha	GNAO1	sp|P09471-2|GNAO_HUMAN Isoform Alpha-2 of Guanine nucleotide-binding protein G(o) subunit alpha OS=Homo sapiens OX=9606 GN=GNAO1;sp|P09471|GNAO_HUMAN Guanine nucleotide-binding protein G(o) subunit alpha OS=Homo sapiens OX=9606 GN=GNAO1 PE=1 SV=4	2	15	10	10	8	7	10	9	9	9	9	7	9	11	10	12	7	6	8	5	9	8	7	9	12	9	6	5	6	7	7	7	7	6	7	8	7	8	4	4	5	2
P09486	P09486	12	12	12	SPARC	SPARC	sp|P09486|SPRC_HUMAN SPARC OS=Homo sapiens OX=9606 GN=SPARC PE=1 SV=1	1	12	12	12	7	9	10	11	8	10	8	8	7	8	11	10	7	8	11	11	7	9	6	7	7	7	7	9	10	11	8	10	8	8	7	8	11	10	7	8	11	11
P09493-2;P09493-9;P09493-8;P09493-7;P09493-3	P09493-2;P09493-9;P09493-8;P09493-7;P09493-3	18;15;15;15;15	2;2;2;2;2	2;2;2;2;2			sp|P09493-2|TPM1_HUMAN Isoform 2 of Tropomyosin alpha-1 chain OS=Homo sapiens OX=9606 GN=TPM1;sp|P09493-9|TPM1_HUMAN Isoform 9 of Tropomyosin alpha-1 chain OS=Homo sapiens OX=9606 GN=TPM1;sp|P09493-8|TPM1_HUMAN Isoform 8 of Tropomyosin alpha-1 chain OS=Hom	5	18	2	2	13	12	17	15	16	17	17	16	16	17	16	14	17	15	16	15	12	13	16	17	18	18	0	0	2	2	2	2	2	2	2	2	1	1	2	2	1	1
P09493-5;P09493-10	P09493-5;P09493-10	19;13	9;3	3;0			sp|P09493-5|TPM1_HUMAN Isoform 5 of Tropomyosin alpha-1 chain OS=Homo sapiens OX=9606 GN=TPM1;sp|P09493-10|TPM1_HUMAN Isoform 10 of Tropomyosin alpha-1 chain OS=Homo sapiens OX=9606 GN=TPM1	2	19	9	3	16	15	18	15	15	18	17	17	16	17	17	15	18	15	18	17	13	16	16	17	18	18	7	5	8	7	6	9	8	8	7	7	8	6	8	6	9	8
P09496-2;P09496-4;P09496-3;P09496;P09496-5	P09496-2;P09496-4;P09496-3;P09496;P09496-5	9;8;8;8;5	9;8;8;8;5	9;8;8;8;5	Clathrin light chain A	CLTA	sp|P09496-2|CLCA_HUMAN Isoform Non-brain of Clathrin light chain A OS=Homo sapiens OX=9606 GN=CLTA;sp|P09496-4|CLCA_HUMAN Isoform 4 of Clathrin light chain A OS=Homo sapiens OX=9606 GN=CLTA;sp|P09496-3|CLCA_HUMAN Isoform 3 of Clathrin light chain A OS=Homo	5	9	9	9	8	8	5	8	7	8	8	6	8	7	8	6	7	6	7	7	6	6	7	8	8	8	8	8	5	8	7	8	8	6	8	7	8	6	7	6	7	7
P09497-2;P09497	P09497-2;P09497	11;9	11;9	11;9	Clathrin light chain B	CLTB	sp|P09497-2|CLCB_HUMAN Isoform Non-brain of Clathrin light chain B OS=Homo sapiens OX=9606 GN=CLTB;sp|P09497|CLCB_HUMAN Clathrin light chain B OS=Homo sapiens OX=9606 GN=CLTB PE=1 SV=1	2	11	11	11	7	8	6	6	4	5	5	5	6	6	8	6	7	3	10	9	5	6	4	5	6	7	7	8	6	6	4	5	5	5	6	6	8	6	7	3	10	9
P09525;P09525-2	P09525;P09525-2	20;17	20;17	20;17	Annexin A4	ANXA4	sp|P09525|ANXA4_HUMAN Annexin A4 OS=Homo sapiens OX=9606 GN=ANXA4 PE=1 SV=4;sp|P09525-2|ANXA4_HUMAN Isoform 2 of Annexin A4 OS=Homo sapiens OX=9606 GN=ANXA4	2	20	20	20	13	11	14	11	12	12	12	12	12	12	11	11	12	10	13	12	12	14	11	12	11	12	13	11	14	11	12	12	12	12	12	12	11	11	12	10	13	12
P09543-2;P09543	P09543-2;P09543	33;32	33;32	32;32	2,3-cyclic-nucleotide 3-phosphodiesterase	CNP	sp|P09543-2|CN37_HUMAN Isoform CNPI of 2,3-cyclic-nucleotide 3-phosphodiesterase OS=Homo sapiens OX=9606 GN=CNP;sp|P09543|CN37_HUMAN 2,3-cyclic-nucleotide 3-phosphodiesterase OS=Homo sapiens OX=9606 GN=CNP PE=1 SV=2	2	33	33	32	24	22	19	20	20	20	19	20	18	21	19	19	18	18	22	20	22	17	20	20	21	23	24	22	19	20	20	20	19	20	18	21	19	19	18	18	22	20
P09601	P09601	11	11	11	Heme oxygenase 1	HMOX1	sp|P09601|HMOX1_HUMAN Heme oxygenase 1 OS=Homo sapiens OX=9606 GN=HMOX1 PE=1 SV=1	1	11	11	11	4	5	6	7	7	6	6	7	6	7	9	10	6	8	10	7	4	6	7	7	5	6	4	5	6	7	7	6	6	7	6	7	9	10	6	8	10	7
P09622;P09622-2;P09622-3	P09622;P09622-2;P09622-3	25;21;21	25;21;21	25;21;21	Dihydrolipoyl dehydrogenase, mitochondrial	DLD	sp|P09622|DLDH_HUMAN Dihydrolipoyl dehydrogenase, mitochondrial OS=Homo sapiens OX=9606 GN=DLD PE=1 SV=2;sp|P09622-2|DLDH_HUMAN Isoform 2 of Dihydrolipoyl dehydrogenase, mitochondrial OS=Homo sapiens OX=9606 GN=DLD;sp|P09622-3|DLDH_HUMAN Isoform 3 of Dihyd	3	25	25	25	22	17	17	18	18	18	20	17	19	18	16	16	14	14	18	18	16	17	17	18	18	17	22	17	17	18	18	18	20	17	19	18	16	16	14	14	18	18
P09651;P09651-3;Q32P51	P09651;P09651-3;Q32P51	40;37;22	1;0;0	1;0;0	Heterogeneous nuclear ribonucleoprotein A1;Heterogeneous nuclear ribonucleoprotein A1, N-terminally processed;Heterogeneous nuclear ribonucleoprotein A1-like 2	HNRNPA1;HNRNPA1L2	sp|P09651|ROA1_HUMAN Heterogeneous nuclear ribonucleoprotein A1 OS=Homo sapiens OX=9606 GN=HNRNPA1 PE=1 SV=5;sp|P09651-3|ROA1_HUMAN Isoform 2 of Heterogeneous nuclear ribonucleoprotein A1 OS=Homo sapiens OX=9606 GN=HNRNPA1;sp|Q32P51|RA1L2_HUMAN Heterogeneo	3	40	1	1	29	28	32	31	32	32	32	32	30	30	33	37	32	34	34	32	27	31	30	32	37	36	0	0	1	1	1	1	1	1	1	1	1	1	1	1	1	0
P09651-2	P09651-2	40	39	1	Heterogeneous nuclear ribonucleoprotein A1;Heterogeneous nuclear ribonucleoprotein A1, N-terminally processed	HNRNPA1	sp|P09651-2|ROA1_HUMAN Isoform A1-A of Heterogeneous nuclear ribonucleoprotein A1 OS=Homo sapiens OX=9606 GN=HNRNPA1	1	40	39	1	29	28	32	31	32	32	32	32	30	29	33	37	32	33	34	33	28	32	29	31	37	36	29	28	32	31	32	32	31	31	29	28	33	37	32	32	34	33
P09661	P09661	20	20	20	U2 small nuclear ribonucleoprotein A	SNRPA1	sp|P09661|RU2A_HUMAN U2 small nuclear ribonucleoprotein A OS=Homo sapiens OX=9606 GN=SNRPA1 PE=1 SV=2	1	20	20	20	11	9	12	11	10	11	12	10	11	10	13	12	9	9	11	9	11	13	9	9	14	14	11	9	12	11	10	11	12	10	11	10	13	12	9	9	11	9
P09668	P09668	3	3	3	Pro-cathepsin H;Cathepsin H mini chain;Cathepsin H;Cathepsin H heavy chain;Cathepsin H light chain	CTSH	sp|P09668|CATH_HUMAN Pro-cathepsin H OS=Homo sapiens OX=9606 GN=CTSH PE=1 SV=4	1	3	3	3	0	0	1	2	2	2	1	1	2	2	2	2	1	2	1	2	0	1	1	2	0	0	0	0	1	2	2	2	1	1	2	2	2	2	1	2	1	2
P09669	P09669	6	6	6	Cytochrome c oxidase subunit 6C	COX6C	sp|P09669|COX6C_HUMAN Cytochrome c oxidase subunit 6C OS=Homo sapiens OX=9606 GN=COX6C PE=1 SV=2	1	6	6	6	6	6	3	3	3	3	3	3	3	3	4	4	4	4	6	5	5	4	3	3	4	4	6	6	3	3	3	3	3	3	3	3	4	4	4	4	6	5
P09874	P09874	74	74	74	Poly [ADP-ribose] polymerase 1	PARP1	sp|P09874|PARP1_HUMAN Poly [ADP-ribose] polymerase 1 OS=Homo sapiens OX=9606 GN=PARP1 PE=1 SV=4	1	74	74	74	51	52	53	47	53	51	49	51	50	50	53	55	54	51	52	49	49	49	49	51	58	60	51	52	53	47	53	51	49	51	50	50	53	55	54	51	52	49
P09884	P09884	15	15	15	DNA polymerase alpha catalytic subunit	POLA1	sp|P09884|DPOLA_HUMAN DNA polymerase alpha catalytic subunit OS=Homo sapiens OX=9606 GN=POLA1 PE=1 SV=2	1	15	15	15	3	2	9	11	10	8	10	11	11	11	11	7	9	7	4	4	2	3	10	10	4	5	3	2	9	11	10	8	10	11	11	11	11	7	9	7	4	4
P09960;P09960-4;P09960-2;P09960-3	P09960;P09960-4;P09960-2;P09960-3	28;25;22;19	28;25;22;19	28;25;22;19	Leukotriene A-4 hydrolase	LTA4H	sp|P09960|LKHA4_HUMAN Leukotriene A-4 hydrolase OS=Homo sapiens OX=9606 GN=LTA4H PE=1 SV=2;sp|P09960-4|LKHA4_HUMAN Isoform 4 of Leukotriene A-4 hydrolase OS=Homo sapiens OX=9606 GN=LTA4H;sp|P09960-2|LKHA4_HUMAN Isoform 2 of Leukotriene A-4 hydrolase OS=Hom	4	28	28	28	18	17	21	17	23	23	20	22	18	17	24	22	19	19	21	20	17	17	18	17	19	20	18	17	21	17	23	23	20	22	18	17	24	22	19	19	21	20
P09972	P09972	18	15	15	Fructose-bisphosphate aldolase C	ALDOC	sp|P09972|ALDOC_HUMAN Fructose-bisphosphate aldolase C OS=Homo sapiens OX=9606 GN=ALDOC PE=1 SV=2	1	18	15	15	14	14	14	12	15	13	13	14	12	12	11	12	10	8	12	12	9	13	12	12	11	9	12	12	12	9	12	10	10	11	10	10	9	10	8	7	10	10
Q71UI9;P0C0S5;Q71UI9-4;Q71UI9-2	Q71UI9;P0C0S5;Q71UI9-4;Q71UI9-2	7;7;6;4	5;5;5;2	0;0;0;0	Histone H2A.V;Histone H2A.Z	H2AFV;H2AFZ	sp|Q71UI9|H2AV_HUMAN Histone H2A.V OS=Homo sapiens OX=9606 GN=H2AZ2 PE=1 SV=3;sp|P0C0S5|H2AZ_HUMAN Histone H2A.Z OS=Homo sapiens OX=9606 GN=H2AZ1 PE=1 SV=2;sp|Q71UI9-4|H2AV_HUMAN Isoform 4 of Histone H2A.V OS=Homo sapiens OX=9606 GN=H2AZ2;sp|Q71UI9-2|H2AV_	4	7	5	0	5	6	5	4	5	5	4	5	4	4	4	4	4	4	5	5	5	5	5	5	6	6	3	4	3	2	3	3	2	3	2	2	2	2	2	2	3	3
Q99878;Q96KK5;Q9BTM1;Q16777;Q6FI13;P20671;P0C0S8;Q9BTM1-2	Q99878;Q96KK5;Q9BTM1;Q16777;Q6FI13;P20671;P0C0S8;Q9BTM1-2	9;9;9;9;9;9;9;5	9;9;9;9;9;9;9;5	4;4;4;4;4;4;4;2	Histone H2A type 1-J;Histone H2A type 1-H;Histone H2A.J;Histone H2A type 2-C;Histone H2A type 2-A;Histone H2A type 1-D;Histone H2A type 1	HIST1H2AJ;HIST1H2AH;H2AFJ;HIST2H2AC;HIST2H2AA3;HIST1H2AD;HIST1H2AG	sp|Q99878|H2A1J_HUMAN Histone H2A type 1-J OS=Homo sapiens OX=9606 GN=H2AC14 PE=1 SV=3;sp|Q96KK5|H2A1H_HUMAN Histone H2A type 1-H OS=Homo sapiens OX=9606 GN=H2AC12 PE=1 SV=3;sp|Q9BTM1|H2AJ_HUMAN Histone H2A.J OS=Homo sapiens OX=9606 GN=H2AJ PE=1 SV=1;sp|Q1	8	9	9	4	7	7	8	7	7	8	8	8	8	7	7	7	8	8	7	7	7	7	8	8	9	9	7	7	8	7	7	8	8	8	8	7	7	7	8	8	7	7
P0C221	P0C221	2	2	2	Coiled-coil domain-containing protein 175	CCDC175	sp|P0C221|CC175_HUMAN Coiled-coil domain-containing protein 175 OS=Homo sapiens OX=9606 GN=CCDC175 PE=4 SV=2	1	2	2	2	0	0	1	1	2	2	1	2	2	2	2	2	1	2	0	0	0	0	1	1	1	0	0	0	1	1	2	2	1	2	2	2	2	2	1	2	0	0
P0C7P0	P0C7P0	1	1	1	CDGSH iron-sulfur domain-containing protein 3, mitochondrial	CISD3	sp|P0C7P0|CISD3_HUMAN CDGSH iron-sulfur domain-containing protein 3, mitochondrial OS=Homo sapiens OX=9606 GN=CISD3 PE=1 SV=1	1	1	1	1	0	0	1	1	1	1	1	1	1	1	1	0	1	0	0	0	0	0	0	1	0	0	0	0	1	1	1	1	1	1	1	1	1	0	1	0	0	0
P0C7P4	P0C7P4	5	1	1	Putative cytochrome b-c1 complex subunit Rieske-like protein 1	UQCRFS1P1	sp|P0C7P4|UCRIL_HUMAN Putative cytochrome b-c1 complex subunit Rieske-like protein 1 OS=Homo sapiens OX=9606 GN=UQCRFS1P1 PE=5 SV=1	1	5	1	1	3	3	3	4	4	3	4	4	3	4	3	3	3	3	3	3	4	3	3	4	3	3	0	0	1	1	1	0	1	1	1	1	0	0	1	1	0	0
P0CAP2-3;P0CAP2;P0CAP2-2;Q9BZD3	P0CAP2-3;P0CAP2;P0CAP2-2;Q9BZD3	2;2;1;1	2;2;1;1	2;2;1;1	DNA-directed RNA polymerase II subunit GRINL1A;Putative GRINL1B complex locus protein 2	POLR2M;GCOM2	sp|P0CAP2-3|GRL1A_HUMAN Isoform 3 of DNA-directed RNA polymerase II subunit GRINL1A OS=Homo sapiens OX=9606 GN=POLR2M;sp|P0CAP2|GRL1A_HUMAN DNA-directed RNA polymerase II subunit GRINL1A OS=Homo sapiens OX=9606 GN=POLR2M PE=1 SV=1;sp|P0CAP2-2|GRL1A_HUMAN I	4	2	2	2	0	0	0	0	1	1	1	1	1	1	1	0	0	0	0	0	0	0	1	1	0	0	0	0	0	0	1	1	1	1	1	1	1	0	0	0	0	0
P0CG13	P0CG13	1	1	1	Chromosome transmission fidelity protein 8 homolog	CHTF8	sp|P0CG13|CTF8_HUMAN Chromosome transmission fidelity protein 8 homolog OS=Homo sapiens OX=9606 GN=CHTF8 PE=1 SV=1	1	1	1	1	0	0	1	1	1	1	1	1	1	1	1	1	1	1	0	0	0	0	1	1	1	1	0	0	1	1	1	1	1	1	1	1	1	1	1	1	0	0
P0CG30;P0CG29	P0CG30;P0CG29	7;7	7;7	7;7	Glutathione S-transferase theta-2B;Glutathione S-transferase theta-2	GSTT2B;GSTT2	sp|P0CG30|GSTT2_HUMAN Glutathione S-transferase theta-2B OS=Homo sapiens OX=9606 GN=GSTT2B PE=1 SV=1;sp|P0CG29|GST2_HUMAN Glutathione S-transferase theta-2 OS=Homo sapiens OX=9606 GN=GSTT2 PE=1 SV=1	2	7	7	7	3	3	6	2	4	2	2	4	4	3	5	5	2	2	4	3	4	4	3	5	4	2	3	3	6	2	4	2	2	4	4	3	5	5	2	2	4	3
P0DMV8;P0DMV9;P0DMV8-2	P0DMV8;P0DMV9;P0DMV8-2	49;49;43	44;44;38	29;29;24	Heat shock 70 kDa protein 1A;Heat shock 70 kDa protein 1B	HSPA1A;HSPA1B	sp|P0DMV8|HS71A_HUMAN Heat shock 70 kDa protein 1A OS=Homo sapiens OX=9606 GN=HSPA1A PE=1 SV=1;sp|P0DMV9|HS71B_HUMAN Heat shock 70 kDa protein 1B OS=Homo sapiens OX=9606 GN=HSPA1B PE=1 SV=1;sp|P0DMV8-2|HS71A_HUMAN Isoform 2 of Heat shock 70 kDa protein 1A	3	49	44	29	37	36	36	36	39	39	34	39	36	36	38	39	30	31	38	38	37	37	38	39	42	44	33	32	32	33	36	36	31	36	33	33	35	36	28	28	35	35
P0DN76;Q01081;Q01081-4;Q8WU68-3;Q8WU68;Q01081-3;Q8WU68-2	P0DN76;Q01081;Q01081-4	11;11;7;4;4;3;3	11;11;7;4;4;3;3	1;1;0;0;0;0;0	Splicing factor U2AF 35 kDa subunit	U2AF1	sp|P0DN76|U2AF5_HUMAN Splicing factor U2AF 35 kDa subunit-like protein OS=Homo sapiens OX=9606 GN=U2AF1L5 PE=1 SV=1;sp|Q01081|U2AF1_HUMAN Splicing factor U2AF 35 kDa subunit OS=Homo sapiens OX=9606 GN=U2AF1 PE=1 SV=3;sp|Q01081-4|U2AF1_HUMAN Isoform 4 of Sp	7	11	11	1	9	9	7	6	6	7	6	7	7	5	7	7	9	7	9	7	6	5	6	7	5	7	9	9	7	6	6	7	6	7	7	5	7	7	9	7	9	7
P0DN79;P35520;P35520-2	P0DN79;P35520;P35520-2	9;9;9	9;9;9	9;9;9	Cystathionine beta-synthase	CBS	sp|P0DN79|CBSL_HUMAN Cystathionine beta-synthase-like protein OS=Homo sapiens OX=9606 GN=CBSL PE=1 SV=1;sp|P35520|CBS_HUMAN Cystathionine beta-synthase OS=Homo sapiens OX=9606 GN=CBS PE=1 SV=2;sp|P35520-2|CBS_HUMAN Isoform 2 of Cystathionine beta-synthase	3	9	9	9	2	2	6	7	7	7	7	7	4	5	4	4	4	5	2	3	5	5	7	7	5	5	2	2	6	7	7	7	7	7	4	5	4	4	4	5	2	3
P0DP25;P0DP24;P0DP23	P0DP25;P0DP24;P0DP23	8;8;8	8;8;8	8;8;8			sp|P0DP25|CALM3_HUMAN Calmodulin-3 OS=Homo sapiens OX=9606 GN=CALM3 PE=1 SV=1;sp|P0DP24|CALM2_HUMAN Calmodulin-2 OS=Homo sapiens OX=9606 GN=CALM2 PE=1 SV=1;sp|P0DP23|CALM1_HUMAN Calmodulin-1 OS=Homo sapiens OX=9606 GN=CALM1 PE=1 SV=1	3	8	8	8	8	8	6	7	7	7	7	7	7	7	8	8	7	7	8	8	8	8	7	7	8	8	8	8	6	7	7	7	7	7	7	7	8	8	7	7	8	8
P0DPB6	P0DPB6	5	5	4			sp|P0DPB6|RPAC2_HUMAN DNA-directed RNA polymerases I and III subunit RPAC2 OS=Homo sapiens OX=9606 GN=POLR1D PE=1 SV=1	1	5	5	4	2	2	5	3	4	3	4	4	3	4	3	3	4	4	2	2	2	3	3	2	1	1	2	2	5	3	4	3	4	4	3	4	3	3	4	4	2	2
P10109	P10109	3	3	3	Adrenodoxin, mitochondrial	FDX1	sp|P10109|ADX_HUMAN Adrenodoxin, mitochondrial OS=Homo sapiens OX=9606 GN=FDX1 PE=1 SV=1	1	3	3	3	2	2	1	2	1	1	1	1	1	1	3	3	1	2	3	3	0	1	1	1	1	1	2	2	1	2	1	1	1	1	1	1	3	3	1	2	3	3
P10114	P10114	3	2	2	Ras-related protein Rap-2a	RAP2A	sp|P10114|RAP2A_HUMAN Ras-related protein Rap-2a OS=Homo sapiens OX=9606 GN=RAP2A PE=1 SV=1	1	3	2	2	2	3	2	2	2	1	1	2	1	1	2	2	2	2	3	3	0	1	1	1	2	2	2	2	2	2	2	1	1	2	1	1	2	2	2	2	2	2
P10155;P10155-3;P10155-5;P10155-4;P10155-2	P10155;P10155-3;P10155-5;P10155-4	23;22;22;22;10	23;22;22;22;10	23;22;22;22;10	60 kDa SS-A/Ro ribonucleoprotein	TROVE2	sp|P10155|RO60_HUMAN 60 kDa SS-A/Ro ribonucleoprotein OS=Homo sapiens OX=9606 GN=RO60 PE=1 SV=2;sp|P10155-3|RO60_HUMAN Isoform 3 of 60 kDa SS-A/Ro ribonucleoprotein OS=Homo sapiens OX=9606 GN=RO60;sp|P10155-5|RO60_HUMAN Isoform 5 of 60 kDa SS-A/Ro ribonucl	5	23	23	23	11	12	14	14	15	13	12	11	13	14	17	17	14	15	13	12	14	15	14	15	19	18	11	12	14	14	15	13	12	11	13	14	17	17	14	15	13	12
P10321;P10321-2	P10321;P10321-2	13;12	10;9	8;8	HLA class I histocompatibility antigen, Cw-7 alpha chain	HLA-C	sp|P10321|HLAC_HUMAN HLA class I histocompatibility antigen, C alpha chain OS=Homo sapiens OX=9606 GN=HLA-C PE=1 SV=3;sp|P10321-2|HLAC_HUMAN Isoform 2 of HLA class I histocompatibility antigen, C alpha chain OS=Homo sapiens OX=9606 GN=HLA-C	2	13	10	8	8	7	8	7	8	8	9	8	9	8	8	9	7	8	8	7	3	5	7	7	6	5	5	4	5	4	5	5	6	5	6	5	5	6	4	5	5	4
P10412;P16402;P22492	P10412;P16402	18;15;5	18;15;5	4;1;0	Histone H1.4;Histone H1.3	HIST1H1E;HIST1H1D	sp|P10412|H14_HUMAN Histone H1.4 OS=Homo sapiens OX=9606 GN=H1-4 PE=1 SV=2;sp|P16402|H13_HUMAN Histone H1.3 OS=Homo sapiens OX=9606 GN=H1-3 PE=1 SV=2	3	18	18	4	17	16	16	15	13	15	13	13	13	14	13	14	12	12	16	15	16	14	13	12	15	15	17	16	16	15	13	15	13	13	13	14	13	14	12	12	16	15
P10415-2;P10415	P10415-2;P10415	3;3	3;3	2;2	Apoptosis regulator Bcl-2	BCL2	sp|P10415-2|BCL2_HUMAN Isoform Beta of Apoptosis regulator Bcl-2 OS=Homo sapiens OX=9606 GN=BCL2;sp|P10415|BCL2_HUMAN Apoptosis regulator Bcl-2 OS=Homo sapiens OX=9606 GN=BCL2 PE=1 SV=2	2	3	3	2	0	0	2	1	2	2	2	1	1	1	1	3	1	1	0	1	1	0	1	1	1	2	0	0	2	1	2	2	2	1	1	1	1	3	1	1	0	1
P10515	P10515	17	17	17	Dihydrolipoyllysine-residue acetyltransferase component of pyruvate dehydrogenase complex, mitochondrial	DLAT	sp|P10515|ODP2_HUMAN Dihydrolipoyllysine-residue acetyltransferase component of pyruvate dehydrogenase complex, mitochondrial OS=Homo sapiens OX=9606 GN=DLAT PE=1 SV=3	1	17	17	17	12	13	8	10	9	10	12	8	6	5	12	11	8	11	11	14	14	12	6	6	11	10	12	13	8	10	9	10	12	8	6	5	12	11	8	11	11	14
P10599;P10599-2	P10599;P10599-2	12;9	12;9	12;9	Thioredoxin	TXN	sp|P10599|THIO_HUMAN Thioredoxin OS=Homo sapiens OX=9606 GN=TXN PE=1 SV=3;sp|P10599-2|THIO_HUMAN Isoform 2 of Thioredoxin OS=Homo sapiens OX=9606 GN=TXN	2	12	12	12	9	8	10	10	8	9	9	8	8	9	9	9	8	8	9	7	9	9	8	9	8	9	9	8	10	10	8	9	9	8	8	9	9	9	8	8	9	7
P10606	P10606	8	8	8	Cytochrome c oxidase subunit 5B, mitochondrial	COX5B	sp|P10606|COX5B_HUMAN Cytochrome c oxidase subunit 5B, mitochondrial OS=Homo sapiens OX=9606 GN=COX5B PE=1 SV=2	1	8	8	8	5	6	6	6	6	6	7	7	7	7	7	7	6	5	7	5	5	6	6	6	6	6	5	6	6	6	6	6	7	7	7	7	7	7	6	5	7	5
P10619-2;P10619	P10619-2;P10619	13;13	13;13	13;13	Lysosomal protective protein;Lysosomal protective protein 32 kDa chain;Lysosomal protective protein 20 kDa chain	CTSA	sp|P10619-2|PPGB_HUMAN Isoform 2 of Lysosomal protective protein OS=Homo sapiens OX=9606 GN=CTSA;sp|P10619|PPGB_HUMAN Lysosomal protective protein OS=Homo sapiens OX=9606 GN=CTSA PE=1 SV=2	2	13	13	13	6	5	10	8	9	8	7	8	8	8	8	8	7	8	9	8	5	4	6	6	6	5	6	5	10	8	9	8	7	8	8	8	8	8	7	8	9	8
P10636-3;P10636-2;P10636-4;P10636-5;P10636-6;P10636-7;P10636-8;P10636;P10636-9	P10636-3;P10636-2;P10636-4;P10636-5;P10636-6;P10636-7;P10636-8;P10636;P10636-9	2;2;2;2;1;1;1;1;1	2;2;2;2;1;1;1;1;1	2;2;2;2;1;1;1;1;1	Microtubule-associated protein tau	MAPT	sp|P10636-3|TAU_HUMAN Isoform Tau-A of Microtubule-associated protein tau OS=Homo sapiens OX=9606 GN=MAPT;sp|P10636-2|TAU_HUMAN Isoform Fetal-tau of Microtubule-associated protein tau OS=Homo sapiens OX=9606 GN=MAPT;sp|P10636-4|TAU_HUMAN Isoform Tau-B of M	9	2	2	2	0	0	1	1	2	2	2	2	2	2	0	0	0	0	0	0	0	1	1	2	0	1	0	0	1	1	2	2	2	2	2	2	0	0	0	0	0	0
P10721;P10721-2;P10721-3	P10721;P10721-2	5;5;2	5;5;2	5;5;2	Mast/stem cell growth factor receptor Kit	KIT	sp|P10721|KIT_HUMAN Mast/stem cell growth factor receptor Kit OS=Homo sapiens OX=9606 GN=KIT PE=1 SV=1;sp|P10721-2|KIT_HUMAN Isoform 2 of Mast/stem cell growth factor receptor Kit OS=Homo sapiens OX=9606 GN=KIT	3	5	5	5	1	1	2	2	3	1	3	3	3	3	3	4	1	0	3	1	1	2	1	3	1	1	1	1	2	2	3	1	3	3	3	3	3	4	1	0	3	1
P10768	P10768	21	21	21	S-formylglutathione hydrolase	ESD	sp|P10768|ESTD_HUMAN S-formylglutathione hydrolase OS=Homo sapiens OX=9606 GN=ESD PE=1 SV=2	1	21	21	21	17	17	17	14	15	15	14	14	13	14	15	15	15	13	15	14	13	12	13	12	12	14	17	17	17	14	15	15	14	14	13	14	15	15	15	13	15	14
P10809;P10809-2	P10809	71;10	71;10	71;10	60 kDa heat shock protein, mitochondrial	HSPD1	sp|P10809|CH60_HUMAN 60 kDa heat shock protein, mitochondrial OS=Homo sapiens OX=9606 GN=HSPD1 PE=1 SV=2	2	71	71	71	58	59	55	50	53	50	50	49	49	47	52	52	50	47	56	52	54	51	48	49	60	57	58	59	55	50	53	50	50	49	49	47	52	52	50	47	56	52
P11021	P11021	56	55	55	78 kDa glucose-regulated protein	HSPA5	sp|P11021|BIP_HUMAN Endoplasmic reticulum chaperone BiP OS=Homo sapiens OX=9606 GN=HSPA5 PE=1 SV=2	1	56	55	55	48	44	44	44	44	43	43	41	44	41	48	47	44	44	49	44	43	41	42	40	49	50	47	43	44	43	43	42	42	40	43	41	47	46	43	43	48	43
P11047	P11047	23	23	23	Laminin subunit gamma-1	LAMC1	sp|P11047|LAMC1_HUMAN Laminin subunit gamma-1 OS=Homo sapiens OX=9606 GN=LAMC1 PE=1 SV=3	1	23	23	23	4	3	12	12	11	11	10	16	11	13	13	13	14	12	9	5	7	11	14	11	5	6	4	3	12	12	11	11	10	16	11	13	13	13	14	12	9	5
P11117;P11117-2	P11117	3;1	3;1	3;1	Lysosomal acid phosphatase	ACP2	sp|P11117|PPAL_HUMAN Lysosomal acid phosphatase OS=Homo sapiens OX=9606 GN=ACP2 PE=1 SV=3	2	3	3	3	1	1	1	2	0	1	1	1	2	1	1	1	1	0	2	2	1	1	1	1	1	0	1	1	1	2	0	1	1	1	2	1	1	1	1	0	2	2
P11142;P11142-2	P11142;P11142-2	64;45	64;45	48;32	Heat shock cognate 71 kDa protein	HSPA8	sp|P11142|HSP7C_HUMAN Heat shock cognate 71 kDa protein OS=Homo sapiens OX=9606 GN=HSPA8 PE=1 SV=1;sp|P11142-2|HSP7C_HUMAN Isoform 2 of Heat shock cognate 71 kDa protein OS=Homo sapiens OX=9606 GN=HSPA8	2	64	64	48	52	53	47	48	47	49	47	47	45	43	50	49	47	46	51	52	51	50	44	44	56	57	52	53	47	48	47	49	47	47	45	43	50	49	47	46	51	52
P11166	P11166	7	7	7	Solute carrier family 2, facilitated glucose transporter member 1	SLC2A1	sp|P11166|GTR1_HUMAN Solute carrier family 2, facilitated glucose transporter member 1 OS=Homo sapiens OX=9606 GN=SLC2A1 PE=1 SV=2	1	7	7	7	5	5	4	4	4	4	4	4	4	4	5	5	4	4	5	5	5	5	4	4	5	6	5	5	4	4	4	4	4	4	4	4	5	5	4	4	5	5
P11171-4;P11171-3;P11171-2;P11171;P11171-6;P11171-5;P11171-7	P11171-4;P11171-3;P11171-2;P11171;P11171-6;P11171-5;P11171-7	9;9;9;9;7;7;6	7;7;7;7;5;5;5	7;7;7;7;5;5;5	Protein 4.1	EPB41	sp|P11171-4|41_HUMAN Isoform 4 of Protein 4.1 OS=Homo sapiens OX=9606 GN=EPB41;sp|P11171-3|41_HUMAN Isoform 3 of Protein 4.1 OS=Homo sapiens OX=9606 GN=EPB41;sp|P11171-2|41_HUMAN Isoform 2 of Protein 4.1 OS=Homo sapiens OX=9606 GN=EPB41;sp|P11171|41_HUMAN	7	9	7	7	5	4	5	6	5	5	6	6	7	6	8	8	4	6	6	6	2	7	7	5	8	7	3	2	4	5	4	4	5	5	6	5	6	6	3	5	4	4
P11172;P11172-3;P11172-2;P11172-4	P11172;P11172-3;P11172-2;P11172-4	19;18;17;13	19;18;17;13	19;18;17;13	Uridine 5-monophosphate synthase;Orotate phosphoribosyltransferase;Orotidine 5-phosphate decarboxylase	UMPS	sp|P11172|UMPS_HUMAN Uridine 5-monophosphate synthase OS=Homo sapiens OX=9606 GN=UMPS PE=1 SV=1;sp|P11172-3|UMPS_HUMAN Isoform 3 of Uridine 5-monophosphate synthase OS=Homo sapiens OX=9606 GN=UMPS;sp|P11172-2|UMPS_HUMAN Isoform 2 of Uridine 5-monophosph	4	19	19	19	12	8	10	9	12	10	11	13	11	12	13	14	10	11	11	6	8	7	10	12	14	12	12	8	10	9	12	10	11	13	11	12	13	14	10	11	11	6
P11177;P11177-2;P11177-3	P11177;P11177-2;P11177-3	17;17;15	17;17;15	17;17;15	Pyruvate dehydrogenase E1 component subunit beta, mitochondrial	PDHB	sp|P11177|ODPB_HUMAN Pyruvate dehydrogenase E1 component subunit beta, mitochondrial OS=Homo sapiens OX=9606 GN=PDHB PE=1 SV=3;sp|P11177-2|ODPB_HUMAN Isoform 2 of Pyruvate dehydrogenase E1 component subunit beta, mitochondrial OS=Homo sapiens OX=9606 GN=PD	3	17	17	17	14	12	13	10	11	11	10	11	11	9	13	14	10	10	12	13	9	9	12	11	13	12	14	12	13	10	11	11	10	11	11	9	13	14	10	10	12	13
P11182	P11182	10	10	10	Lipoamide acyltransferase component of branched-chain alpha-keto acid dehydrogenase complex, mitochondrial	DBT	sp|P11182|ODB2_HUMAN Lipoamide acyltransferase component of branched-chain alpha-keto acid dehydrogenase complex, mitochondrial OS=Homo sapiens OX=9606 GN=DBT PE=1 SV=3	1	10	10	10	6	6	5	5	6	6	6	6	6	6	6	6	6	4	4	5	7	6	5	5	6	5	6	6	5	5	6	6	6	6	6	6	6	6	6	4	4	5
P11216	P11216	80	80	66	Glycogen phosphorylase, brain form	PYGB	sp|P11216|PYGB_HUMAN Glycogen phosphorylase, brain form OS=Homo sapiens OX=9606 GN=PYGB PE=1 SV=5	1	80	80	66	69	64	59	62	57	57	58	58	58	54	69	67	56	60	69	63	61	60	60	57	59	62	69	64	59	62	57	57	58	58	58	54	69	67	56	60	69	63
P11233	P11233	9	9	4	Ras-related protein Ral-A	RALA	sp|P11233|RALA_HUMAN Ras-related protein Ral-A OS=Homo sapiens OX=9606 GN=RALA PE=1 SV=1	1	9	9	4	7	7	8	5	7	8	7	7	6	6	6	6	7	5	7	6	5	5	6	7	6	8	7	7	8	5	7	8	7	7	6	6	6	6	7	5	7	6
P11234;P11234-2;P11234-3	P11234;P11234-2;P11234-3	7;7;6	2;2;2	2;2;2	Ras-related protein Ral-B	RALB	sp|P11234|RALB_HUMAN Ras-related protein Ral-B OS=Homo sapiens OX=9606 GN=RALB PE=1 SV=1;sp|P11234-2|RALB_HUMAN Isoform 2 of Ras-related protein Ral-B OS=Homo sapiens OX=9606 GN=RALB;sp|P11234-3|RALB_HUMAN Isoform 3 of Ras-related protein Ral-B OS=Homo sap	3	7	2	2	4	4	5	3	5	5	5	5	4	3	2	3	3	3	3	3	3	2	4	4	4	5	0	0	1	1	1	1	1	1	1	0	0	1	0	1	0	0
P11279;P11279-2	P11279;P11279-2	5;3	5;3	5;3	Lysosome-associated membrane glycoprotein 1	LAMP1	sp|P11279|LAMP1_HUMAN Lysosome-associated membrane glycoprotein 1 OS=Homo sapiens OX=9606 GN=LAMP1 PE=1 SV=3;sp|P11279-2|LAMP1_HUMAN Isoform 2 of Lysosome-associated membrane glycoprotein 1 OS=Homo sapiens OX=9606 GN=LAMP1	2	5	5	5	5	5	5	3	3	4	3	3	2	3	5	5	4	3	5	5	3	4	4	4	4	3	5	5	5	3	3	4	3	3	2	3	5	5	4	3	5	5
P11310;P11310-2	P11310;P11310-2	20;20	20;20	20;20	Medium-chain specific acyl-CoA dehydrogenase, mitochondrial	ACADM	sp|P11310|ACADM_HUMAN Medium-chain specific acyl-CoA dehydrogenase, mitochondrial OS=Homo sapiens OX=9606 GN=ACADM PE=1 SV=1;sp|P11310-2|ACADM_HUMAN Isoform 2 of Medium-chain specific acyl-CoA dehydrogenase, mitochondrial OS=Homo sapiens OX=9606 GN=ACADM	2	20	20	20	16	12	17	10	15	15	13	14	12	10	13	14	12	10	14	14	14	11	11	11	15	16	16	12	17	10	15	15	13	14	12	10	13	14	12	10	14	14
P11387;Q969P6-2;Q969P6	P11387	42;4;4	42;4;4	42;4;4	DNA topoisomerase 1	TOP1	sp|P11387|TOP1_HUMAN DNA topoisomerase 1 OS=Homo sapiens OX=9606 GN=TOP1 PE=1 SV=2	3	42	42	42	30	31	25	23	22	20	19	22	25	21	27	26	25	25	33	30	21	21	21	20	25	22	30	31	25	23	22	20	19	22	25	21	27	26	25	25	33	30
P11388;P11388-2;P11388-3;P11388-4	P11388;P11388-2;P11388-3;P11388-4	67;67;67;67	67;67;67;67	54;54;54;54	DNA topoisomerase 2-alpha	TOP2A	sp|P11388|TOP2A_HUMAN DNA topoisomerase 2-alpha OS=Homo sapiens OX=9606 GN=TOP2A PE=1 SV=3;sp|P11388-2|TOP2A_HUMAN Isoform 2 of DNA topoisomerase 2-alpha OS=Homo sapiens OX=9606 GN=TOP2A;sp|P11388-3|TOP2A_HUMAN Isoform 3 of DNA topoisomerase 2-alpha OS=Hom	4	67	67	54	34	33	41	38	39	36	34	32	33	34	43	42	38	33	43	38	37	46	34	35	49	42	34	33	41	38	39	36	34	32	33	34	43	42	38	33	43	38
P11413;P11413-3;P11413-2	P11413;P11413-3;P11413-2	33;33;33	33;33;33	33;33;33	Glucose-6-phosphate 1-dehydrogenase	G6PD	sp|P11413|G6PD_HUMAN Glucose-6-phosphate 1-dehydrogenase OS=Homo sapiens OX=9606 GN=G6PD PE=1 SV=4;sp|P11413-3|G6PD_HUMAN Isoform 3 of Glucose-6-phosphate 1-dehydrogenase OS=Homo sapiens OX=9606 GN=G6PD;sp|P11413-2|G6PD_HUMAN Isoform Long of Glucose-6-phos	3	33	33	33	16	14	19	21	20	18	17	19	17	18	23	22	22	20	16	15	23	26	25	24	23	22	16	14	19	21	20	18	17	19	17	18	23	22	22	20	16	15
P11441	P11441	8	8	8	Ubiquitin-like protein 4A	UBL4A	sp|P11441|UBL4A_HUMAN Ubiquitin-like protein 4A OS=Homo sapiens OX=9606 GN=UBL4A PE=1 SV=1	1	8	8	8	1	1	1	1	2	2	2	3	2	1	3	3	3	1	2	0	4	5	1	1	3	4	1	1	1	1	2	2	2	3	2	1	3	3	3	1	2	0
P11474-2;P11474;O95718;O95718-2;O95718-1	P11474-2;P11474;O95718;O95718-2;O95718-1	2;2;1;1;1	2;2;1;1;1	2;2;1;1;1	Steroid hormone receptor ERR1;Steroid hormone receptor ERR2	ESRRA;ESRRB	sp|P11474-2|ERR1_HUMAN Isoform 2 of Steroid hormone receptor ERR1 OS=Homo sapiens OX=9606 GN=ESRRA;sp|P11474|ERR1_HUMAN Steroid hormone receptor ERR1 OS=Homo sapiens OX=9606 GN=ESRRA PE=1 SV=3;sp|O95718|ERR2_HUMAN Steroid hormone receptor ERR2 OS=Homo sapi	5	2	2	2	1	0	2	2	2	2	2	2	2	2	2	2	2	2	1	1	1	1	2	2	0	1	1	0	2	2	2	2	2	2	2	2	2	2	2	2	1	1
P11498;P11498-2	P11498	51;21	51;21	51;21	Pyruvate carboxylase, mitochondrial	PC	sp|P11498|PYC_HUMAN Pyruvate carboxylase, mitochondrial OS=Homo sapiens OX=9606 GN=PC PE=1 SV=2	2	51	51	51	39	36	39	32	30	30	32	32	31	30	40	38	32	30	40	38	30	31	29	30	35	32	39	36	39	32	30	30	32	32	31	30	40	38	32	30	40	38
[truncated: 4,783 more rows]
[truncated: 185 more columns]

## Sheet: essential data only minus conta
id	Protein IDs	Majority protein IDs	Protein names	Gene names	LFQ intensity 1_20_1_Slot1-10_1_2218	LFQ intensity 1_20_1_Slot1-10_2_2219	LFQ intensity 1_20_2_Slot1-11_1_2220	LFQ intensity 1_20_3_Slot1-12_2_2223	LFQ intensity 1_5_1_Slot1-4_1_2202	LFQ intensity 1_5_1_Slot1-4_2_2203	LFQ intensity 1_5_2_Slot1-5_1_2204	LFQ intensity 1_5_2_Slot1-5_2_2205	LFQ intensity 1_5_3_Slot1-6_1_2206	LFQ intensity 1_5_3_Slot1-6_2_2207	LFQ intensity 2_5_1_Slot1-7_1_2210	LFQ intensity 2_5_1_Slot1-7_2_2211	LFQ intensity 2_5_2_Slot1-8_1_2212	LFQ intensity 2_5_2_Slot1-8_2_2213	LFQ intensity 2_5_3_Slot1-9_1_2214	LFQ intensity 2_5_3_Slot1-9_2_2215	LFQ intensity WT1_Slot1-1_1_2195	LFQ intensity WT1_Slot1-1_1_2196	LFQ intensity WT2_Slot1-2_1_2197	LFQ intensity WT2_Slot1-2_2_2198	LFQ intensity WT3_Slot1-3_1_2199	LFQ intensity WT3_Slot1-3_1_2200	Only identified by site	Reverse	Potential contaminant
[truncated: 5,668 more rows]

[truncated: 6 more sheets: replace and pvlue calc, significant KA, significant KB, significant KC, combined upregulated, combined downregulated]
